# Supplementary material
Source: ML conference proceedings conference paper supplement (https://openreview.net/forum?id=h3pdqoIk1b)

Original prediction  
(label: 4,  
'4')

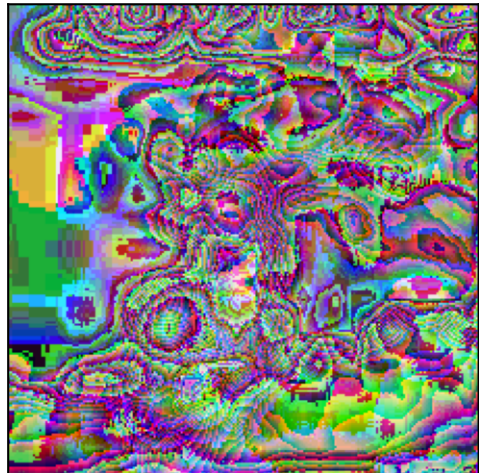

Adversarial prediction  
(label: 0,  
'0')

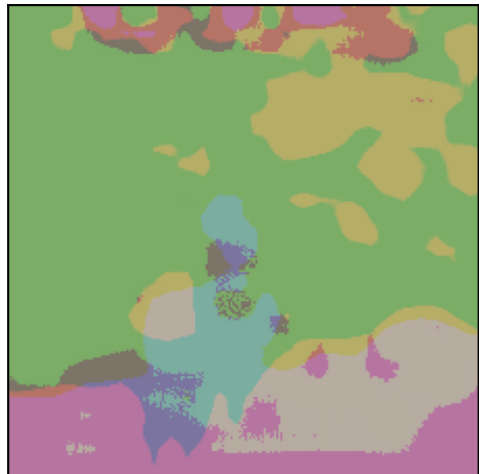

Original prediction  
(label: 9,  
'9')

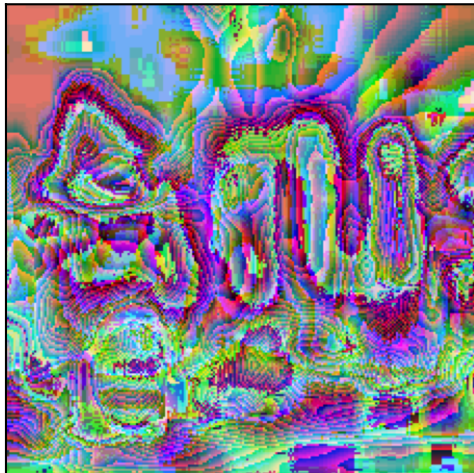

Adversarial prediction  
(label: 0,  
'0')

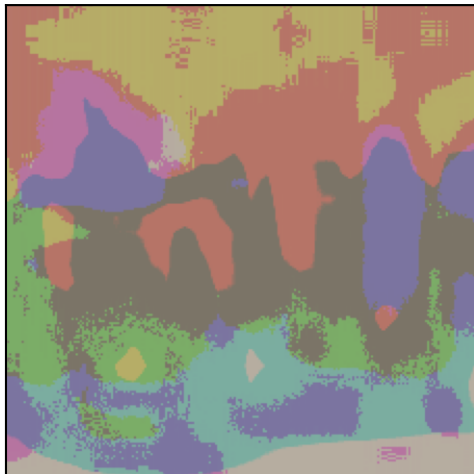

Original prediction  
(label: 7,  
'7')

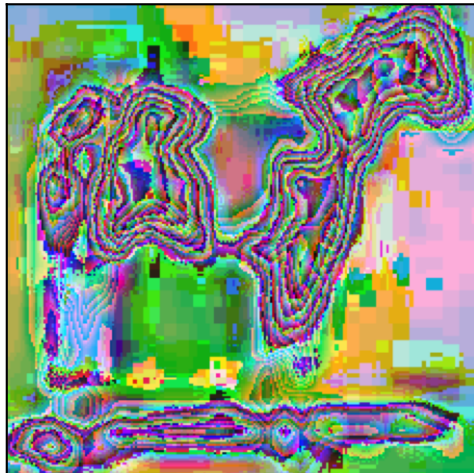

Adversarial prediction  
(label: 0,  
'0')

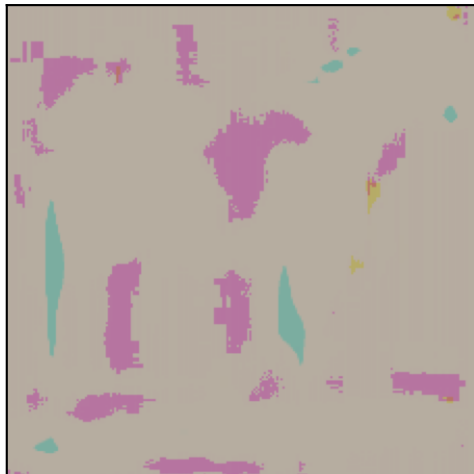

Original prediction  
(label: 3,  
'3')

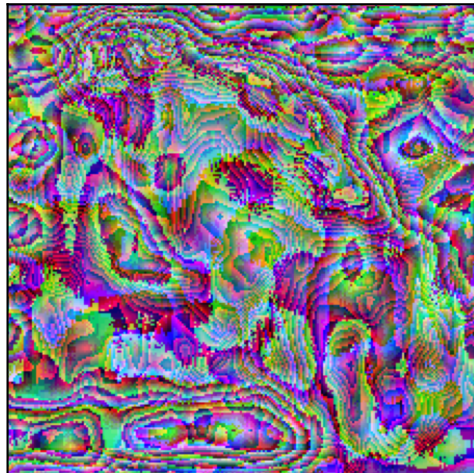

Adversarial prediction  
(label: 0,  
'0')

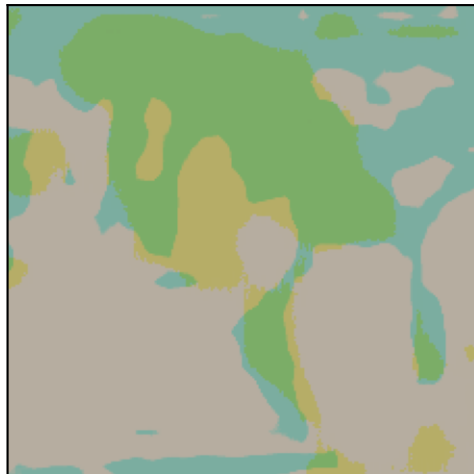

Original prediction  
(label: 3,  
'3')

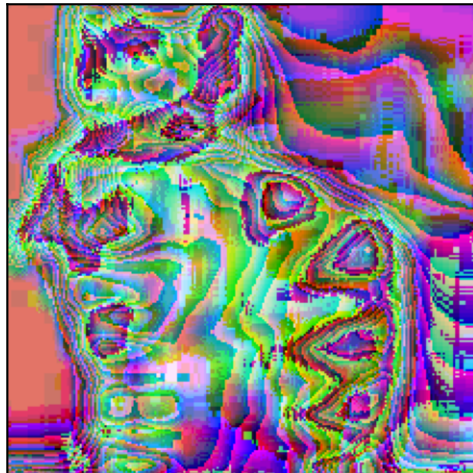

Adversarial prediction  
(label: 0,  
'0')

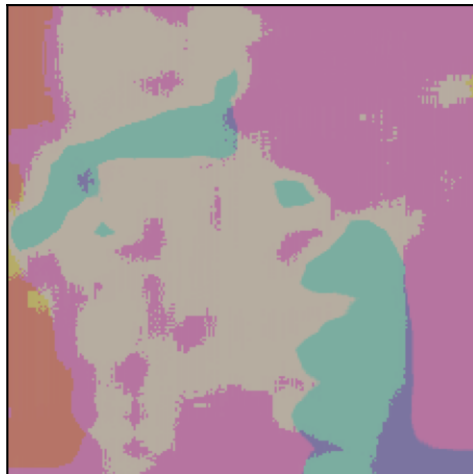

Supplement: supplementary_material [file attack_example_99_2023_05_15_01_20_43.pdf › adversarial_for_icml/ats/experiments/blackbox_budget=10_converted_alexnet_colorization_in1k_pretext/model_target=CIFAR10_deep_fulltune_data_name=CIFAR10_attack_name=Square_untargeted/results/attack_example_99_2023_05_15_01_20_43.pdf]
