# Supplementary material
Source: ML conference proceedings conference paper supplement (https://openreview.net/forum?id=h3pdqoIk1b)
Supplement: supplementary_material [file transferability_attack_type_whitebox_diff_with_longerPGD.pdf › adversarial_for_icml/figures/transferability_attack_type_whitebox_diff_with_longerPGD.pdf]

Adversarial Transferability For Different Attacks

Transferability Accuracy Difference

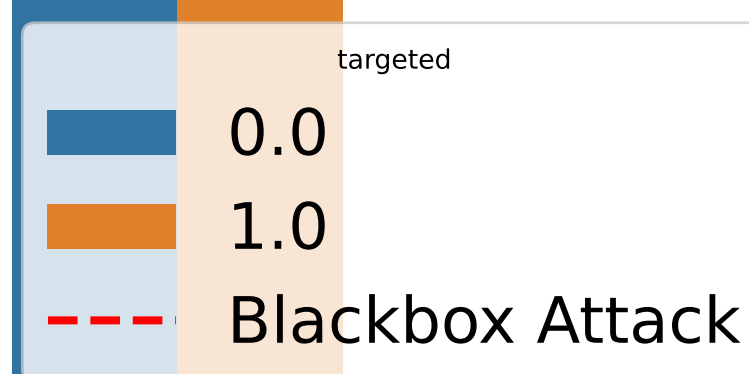

Difference Level

Backbone Attack mode

depth

dataset

depth, mode

dataset, depth

dataset, mode

dataset, depth, mode

Blackbox Attack

0

-5

-10

-15

-20

-25

-30
