# Supplementary material
Source: ML conference proceedings conference paper supplement (https://openreview.net/forum?id=h3pdqoIk1b)

Adversarial Transferability For Different Datasets

Transferability Accuracy

proxy\_dataset\_name

- CIFAR100
- oxford\_pets
- CIFAR10
- oxford\_flowers

Whitebox

Backbone Attack

mode

depth

dataset

depth, mode

dataset, depth

dataset, mode

dataset, depth, mode

Blackbox Attack

Difference Level

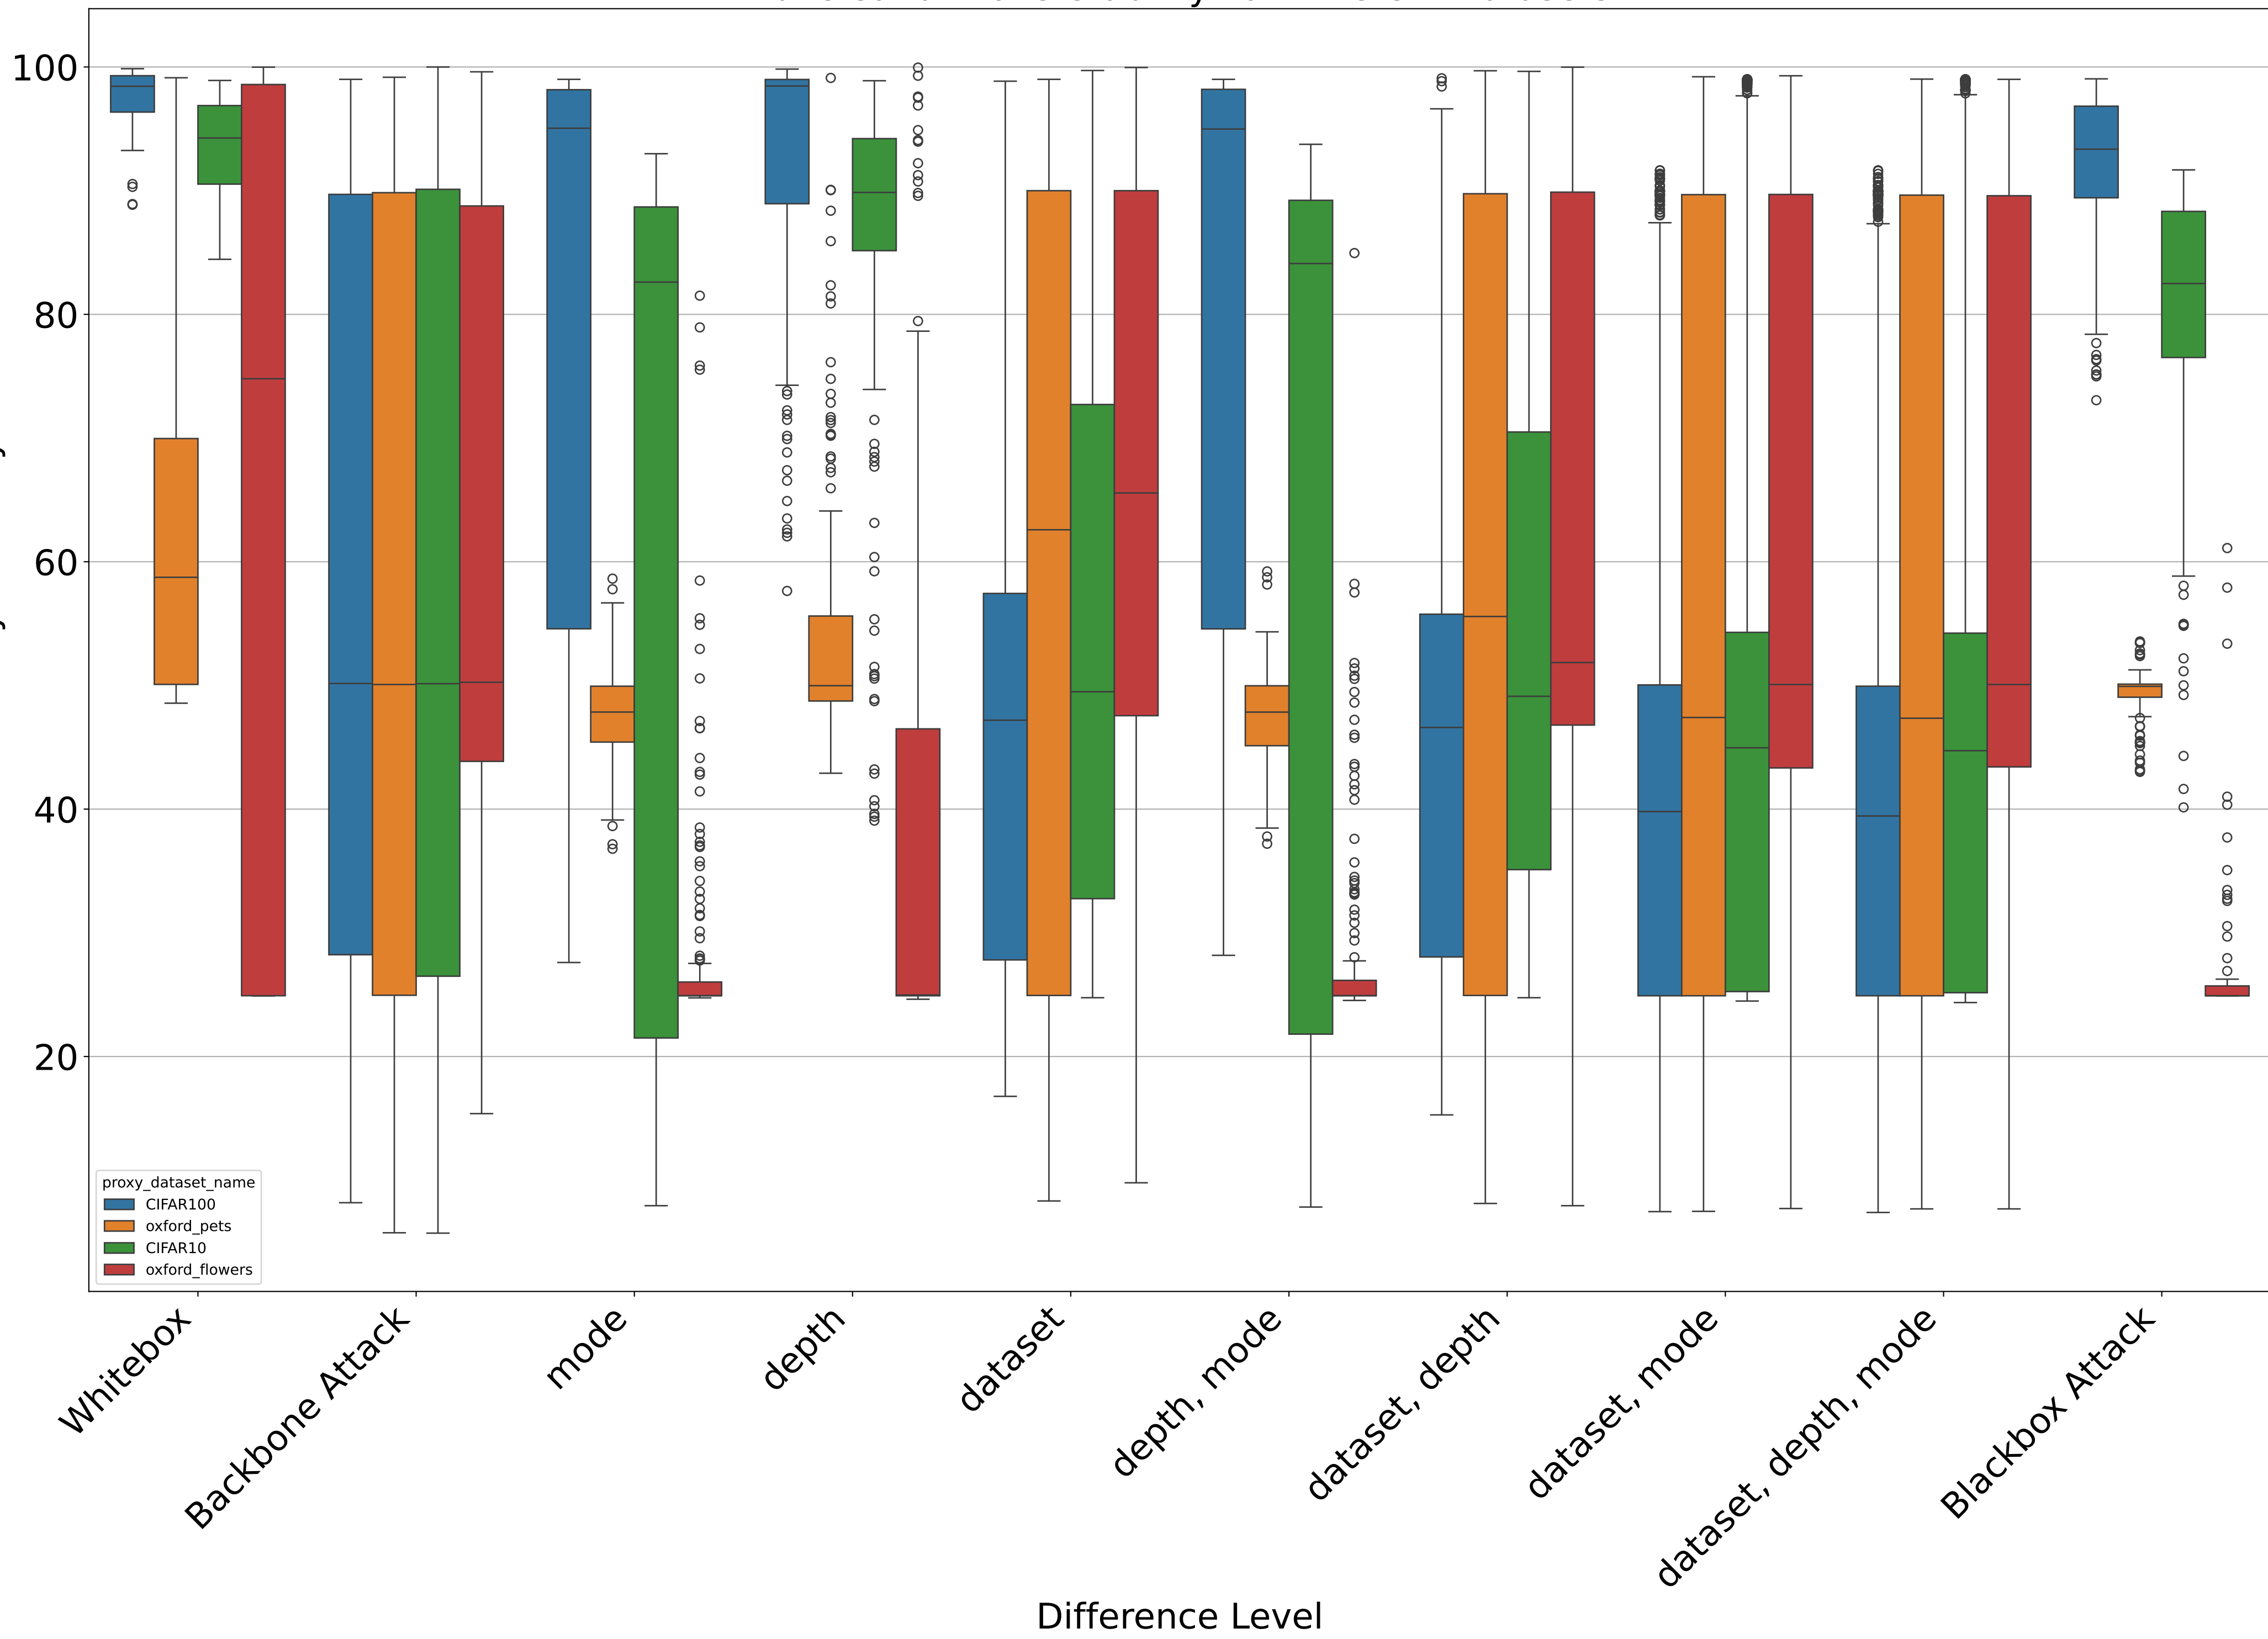

Supplement: supplementary_material [file transferability_datasets_target_proxy_with_longerPGD.pdf › adversarial_for_icml/figures/transferability_datasets_target_proxy_with_longerPGD.pdf]
