# Supplementary material
Source: ML conference proceedings conference paper supplement (https://openreview.net/forum?id=h3pdqoIk1b)

Adversarial Transferability For Different Attacks

Transferability Accuracy Difference

Blackbox Attack

Backbone Attack mode  
depth  
dataset  
depth, mode  
dataset, depth  
dataset, mode  
dataset, depth, mode  
Blackbox Attack

Difference Level

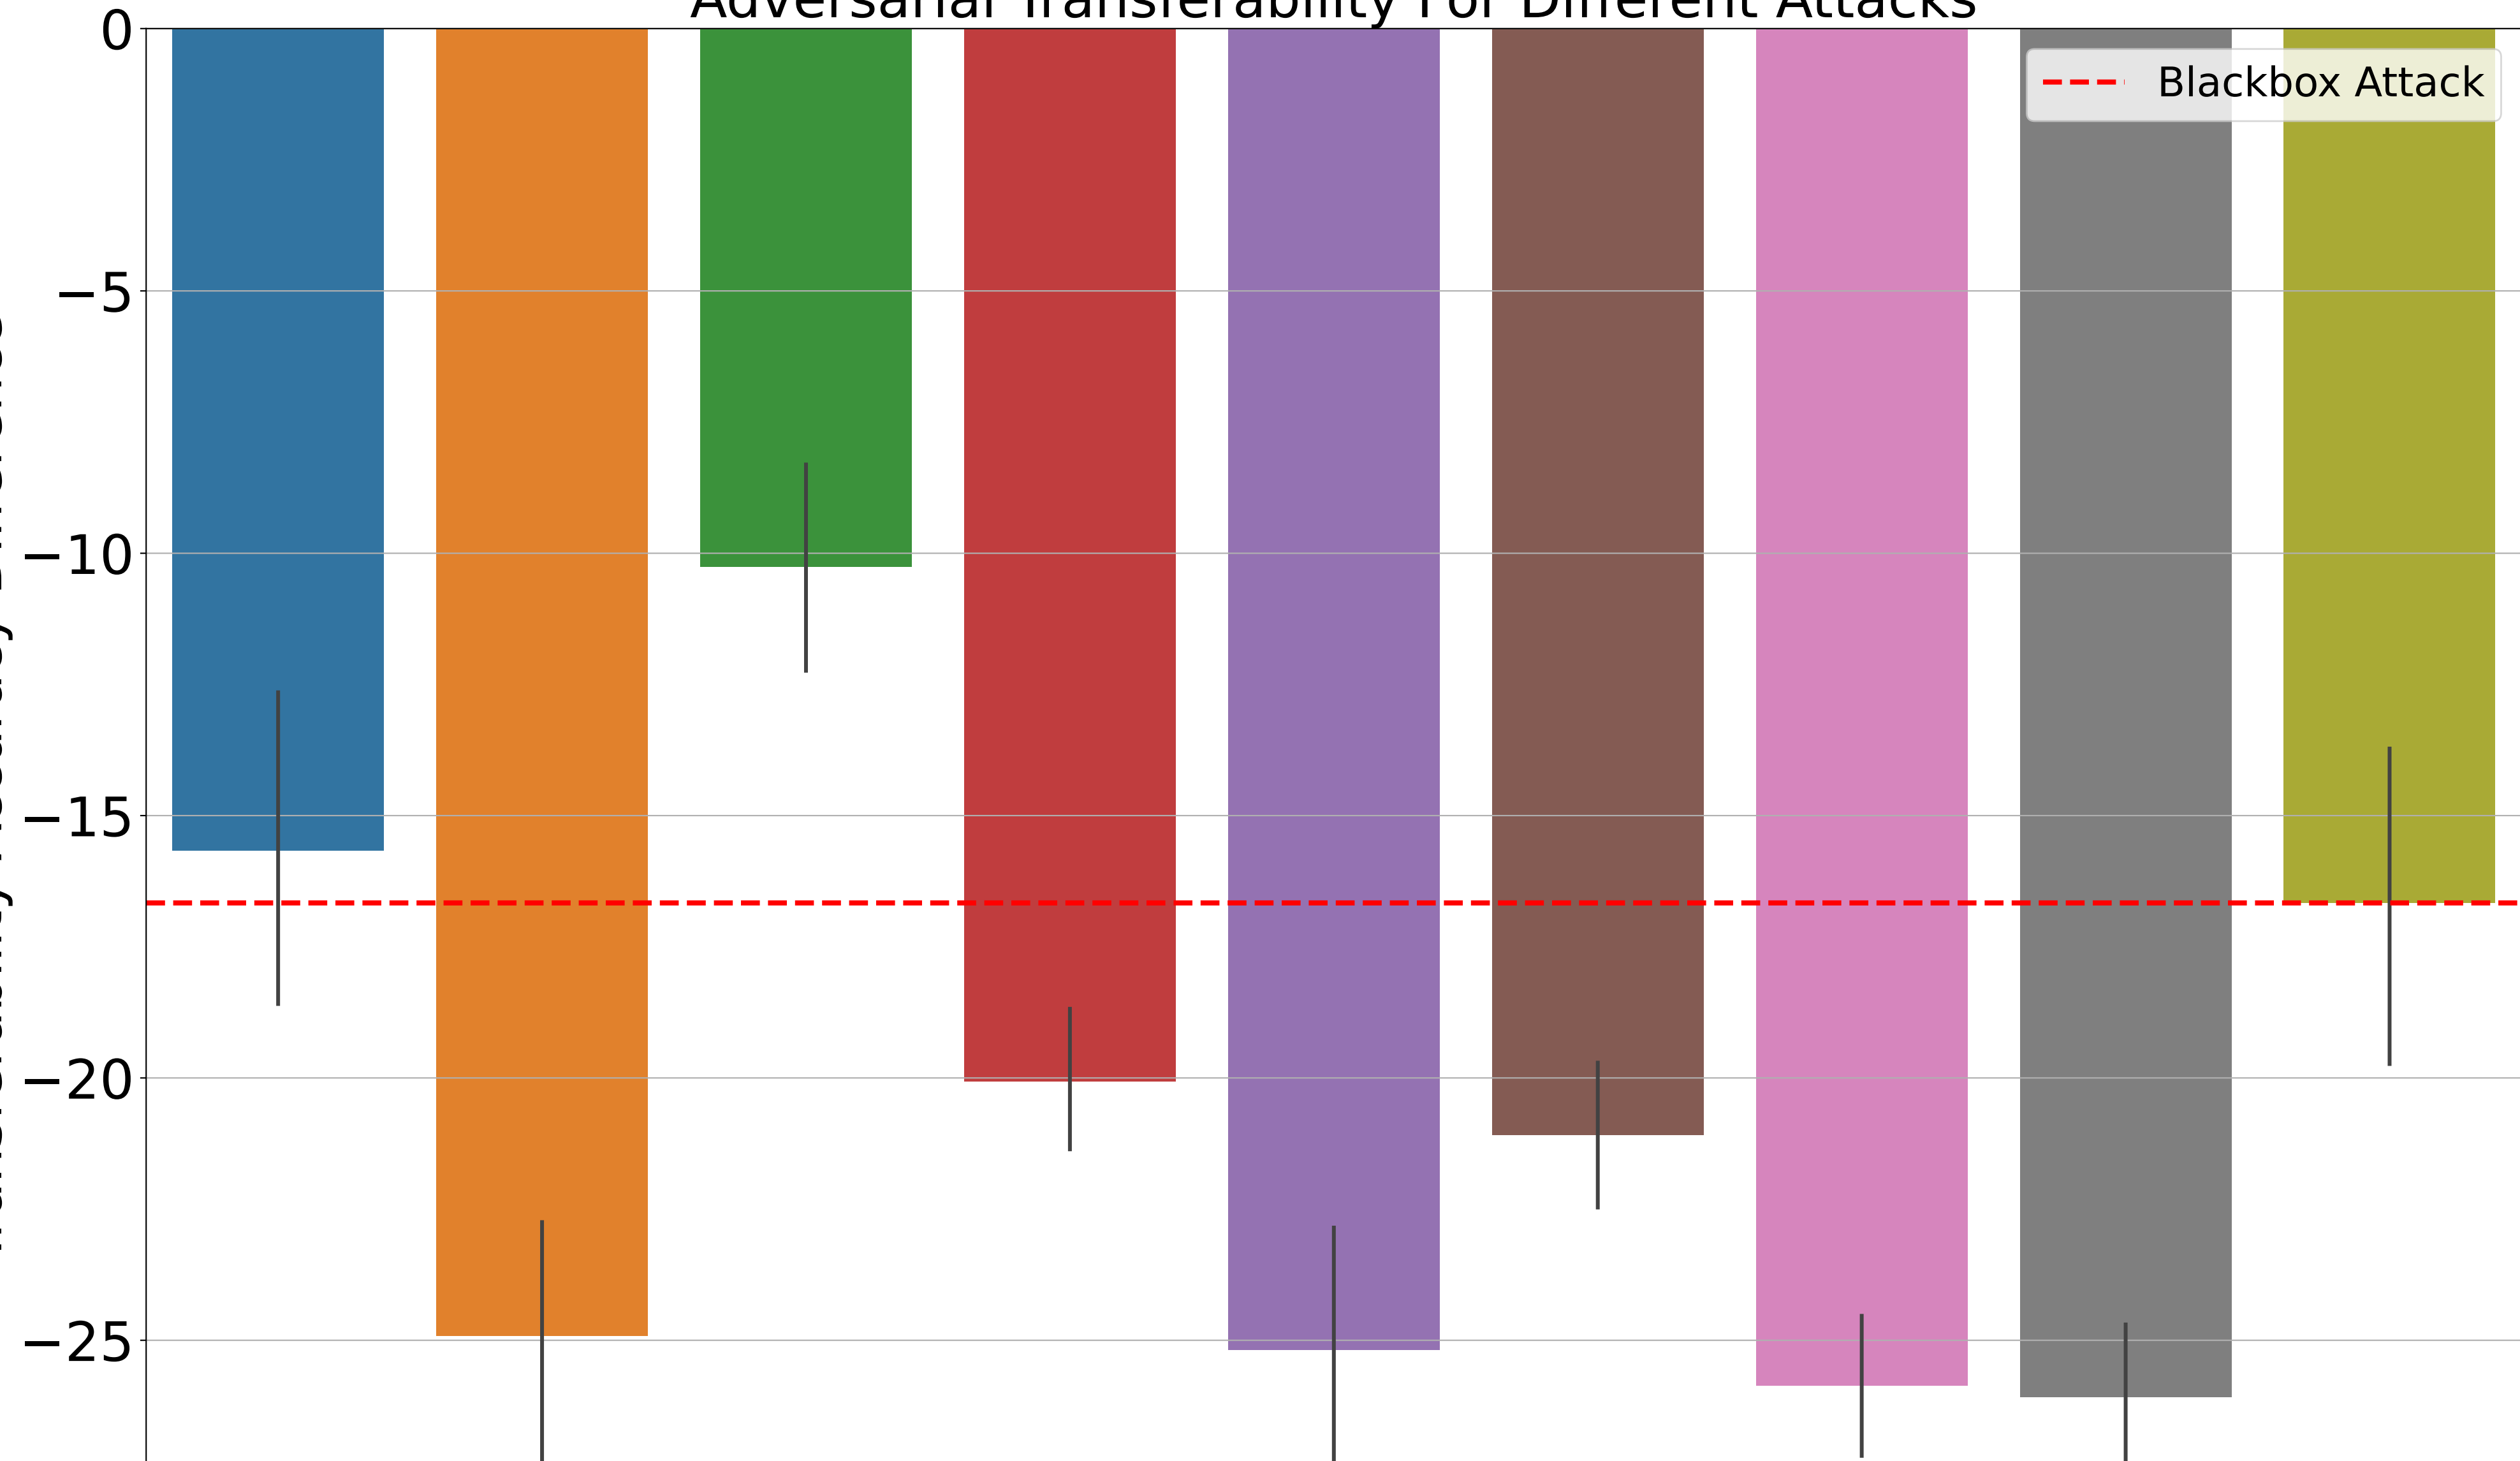

Supplement: supplementary_material [file transferability_overall_whitebox_diff_with_longerPGD.pdf › adversarial_for_icml/figures/transferability_overall_whitebox_diff_with_longerPGD.pdf]
