# Supplementary material (part 1 of 2)
Source: ML conference proceedings conference paper supplement (https://openreview.net/forum?id=h3pdqoIk1b)

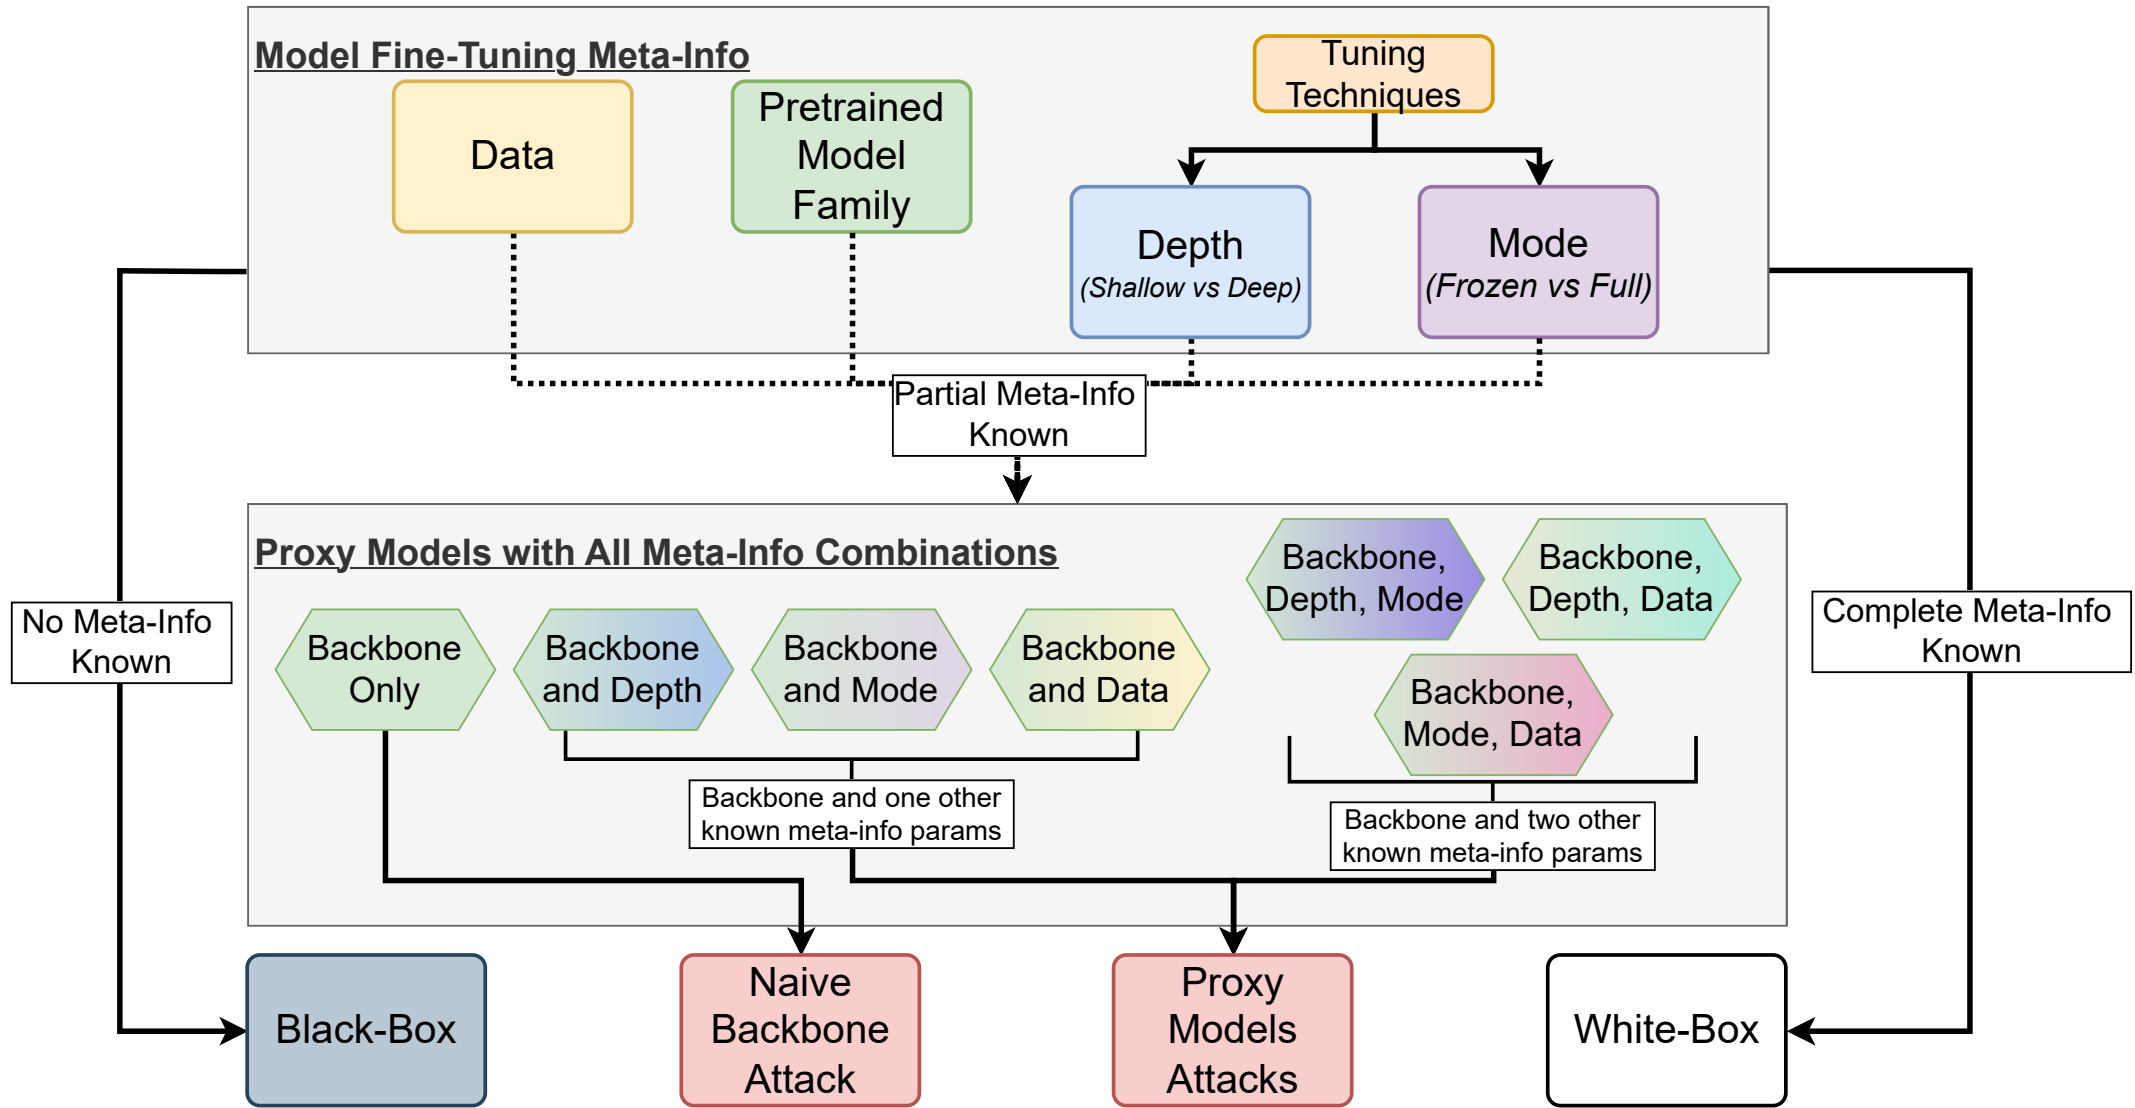

Supplement: supplementary_material [file adversarial_demo.pdf › adversarial_for_icml/figures/adversarial_demo.pdf]

JS Divergence by attack\_name

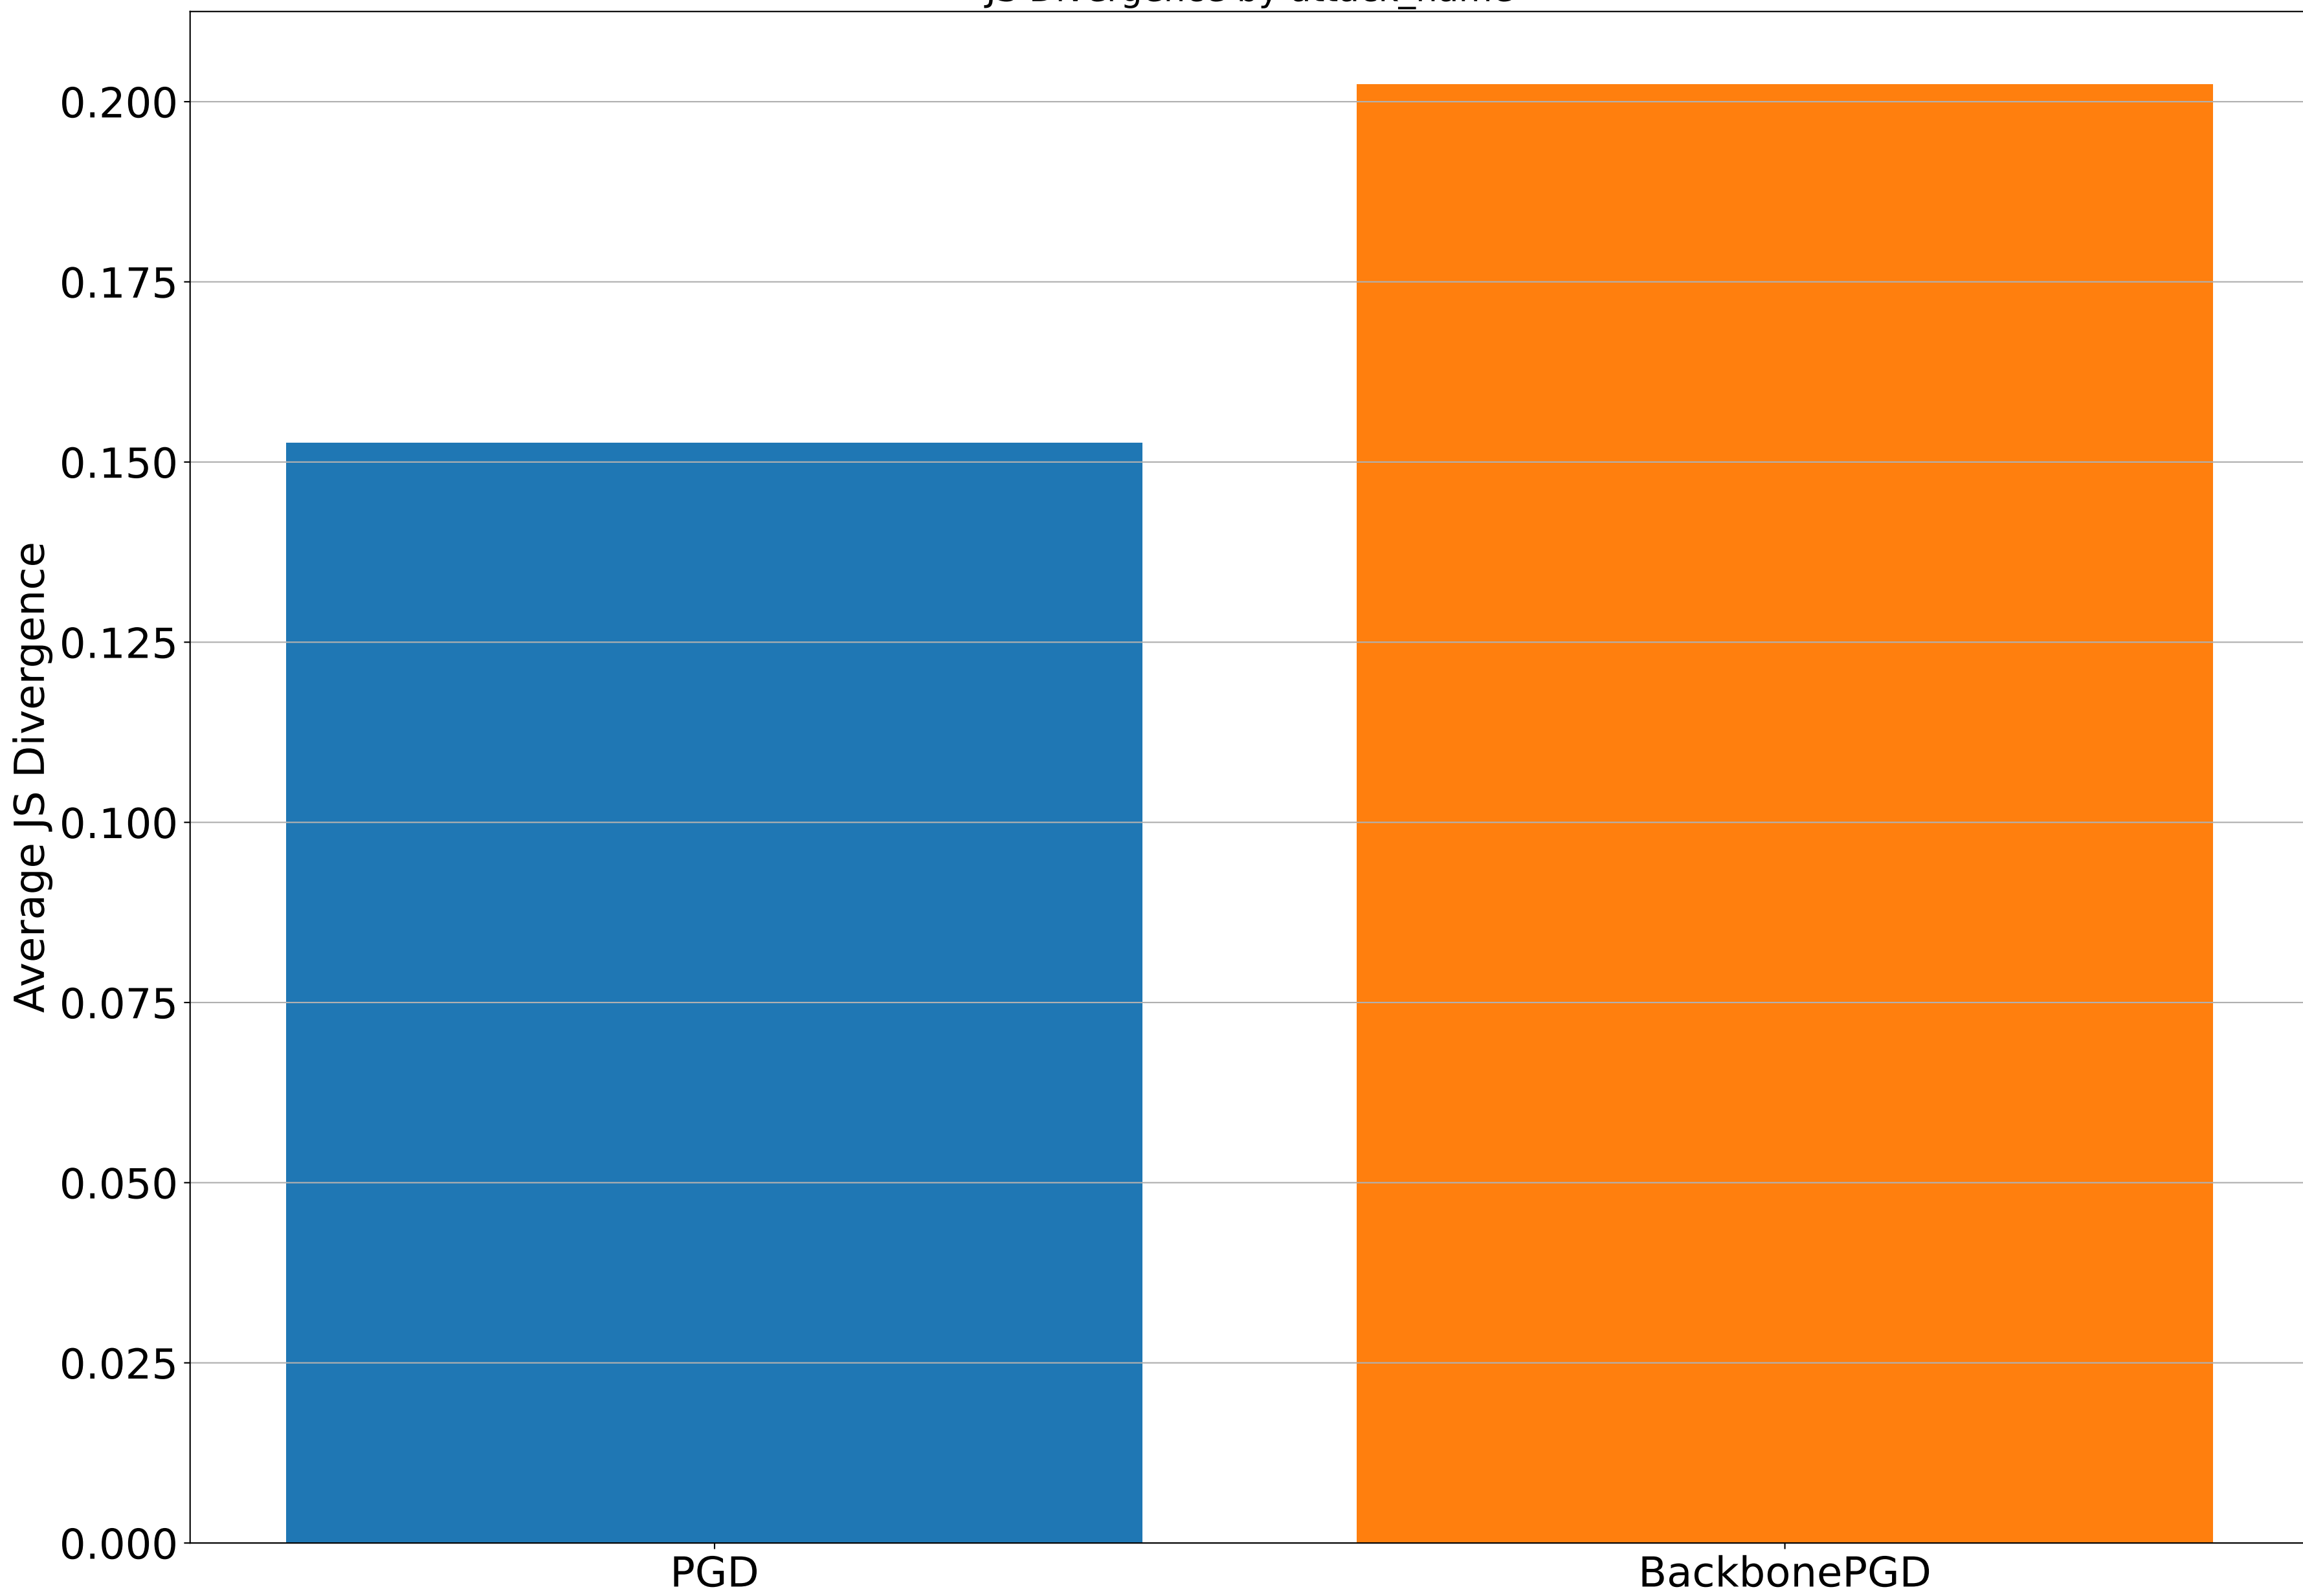

Supplement: supplementary_material [file js_divergence_attack_name.pdf › adversarial_for_icml/figures/js_div/js_divergence_attack_name.pdf]

JS Divergence by diff\_type

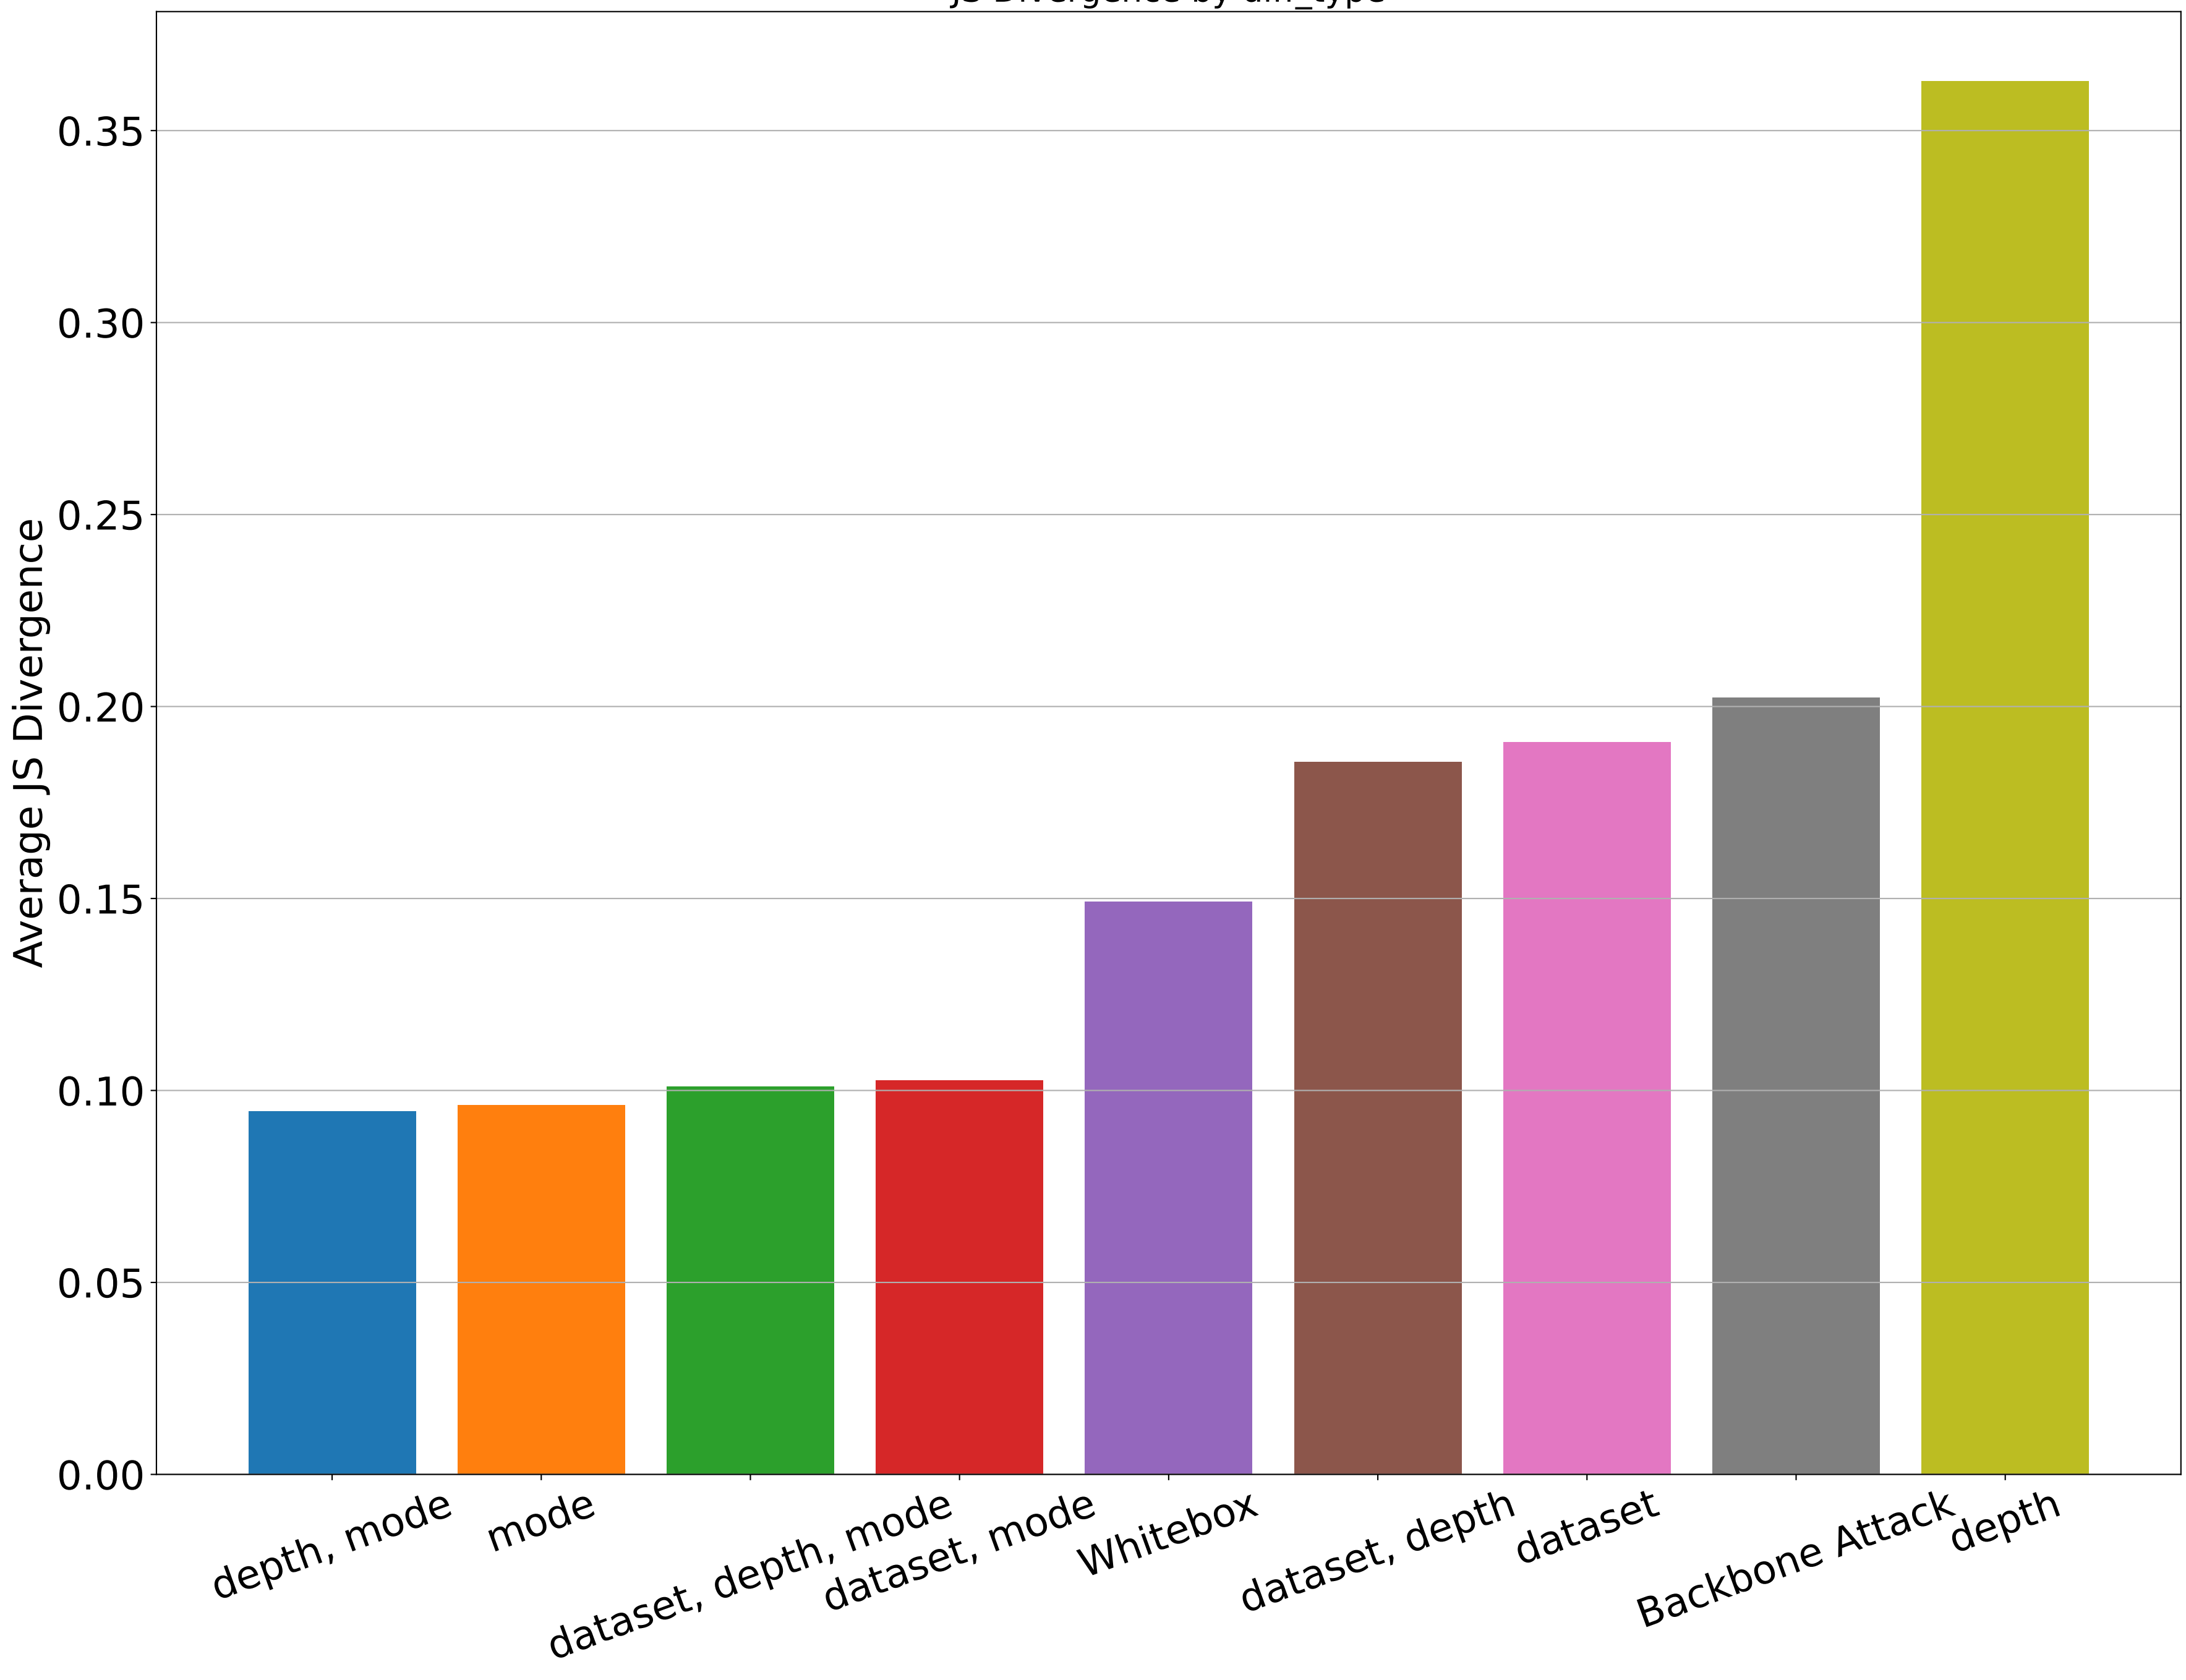

Supplement: supplementary_material [file js_divergence_diff_type.pdf › adversarial_for_icml/figures/js_div/js_divergence_diff_type.pdf]

JS Divergence by model\_family

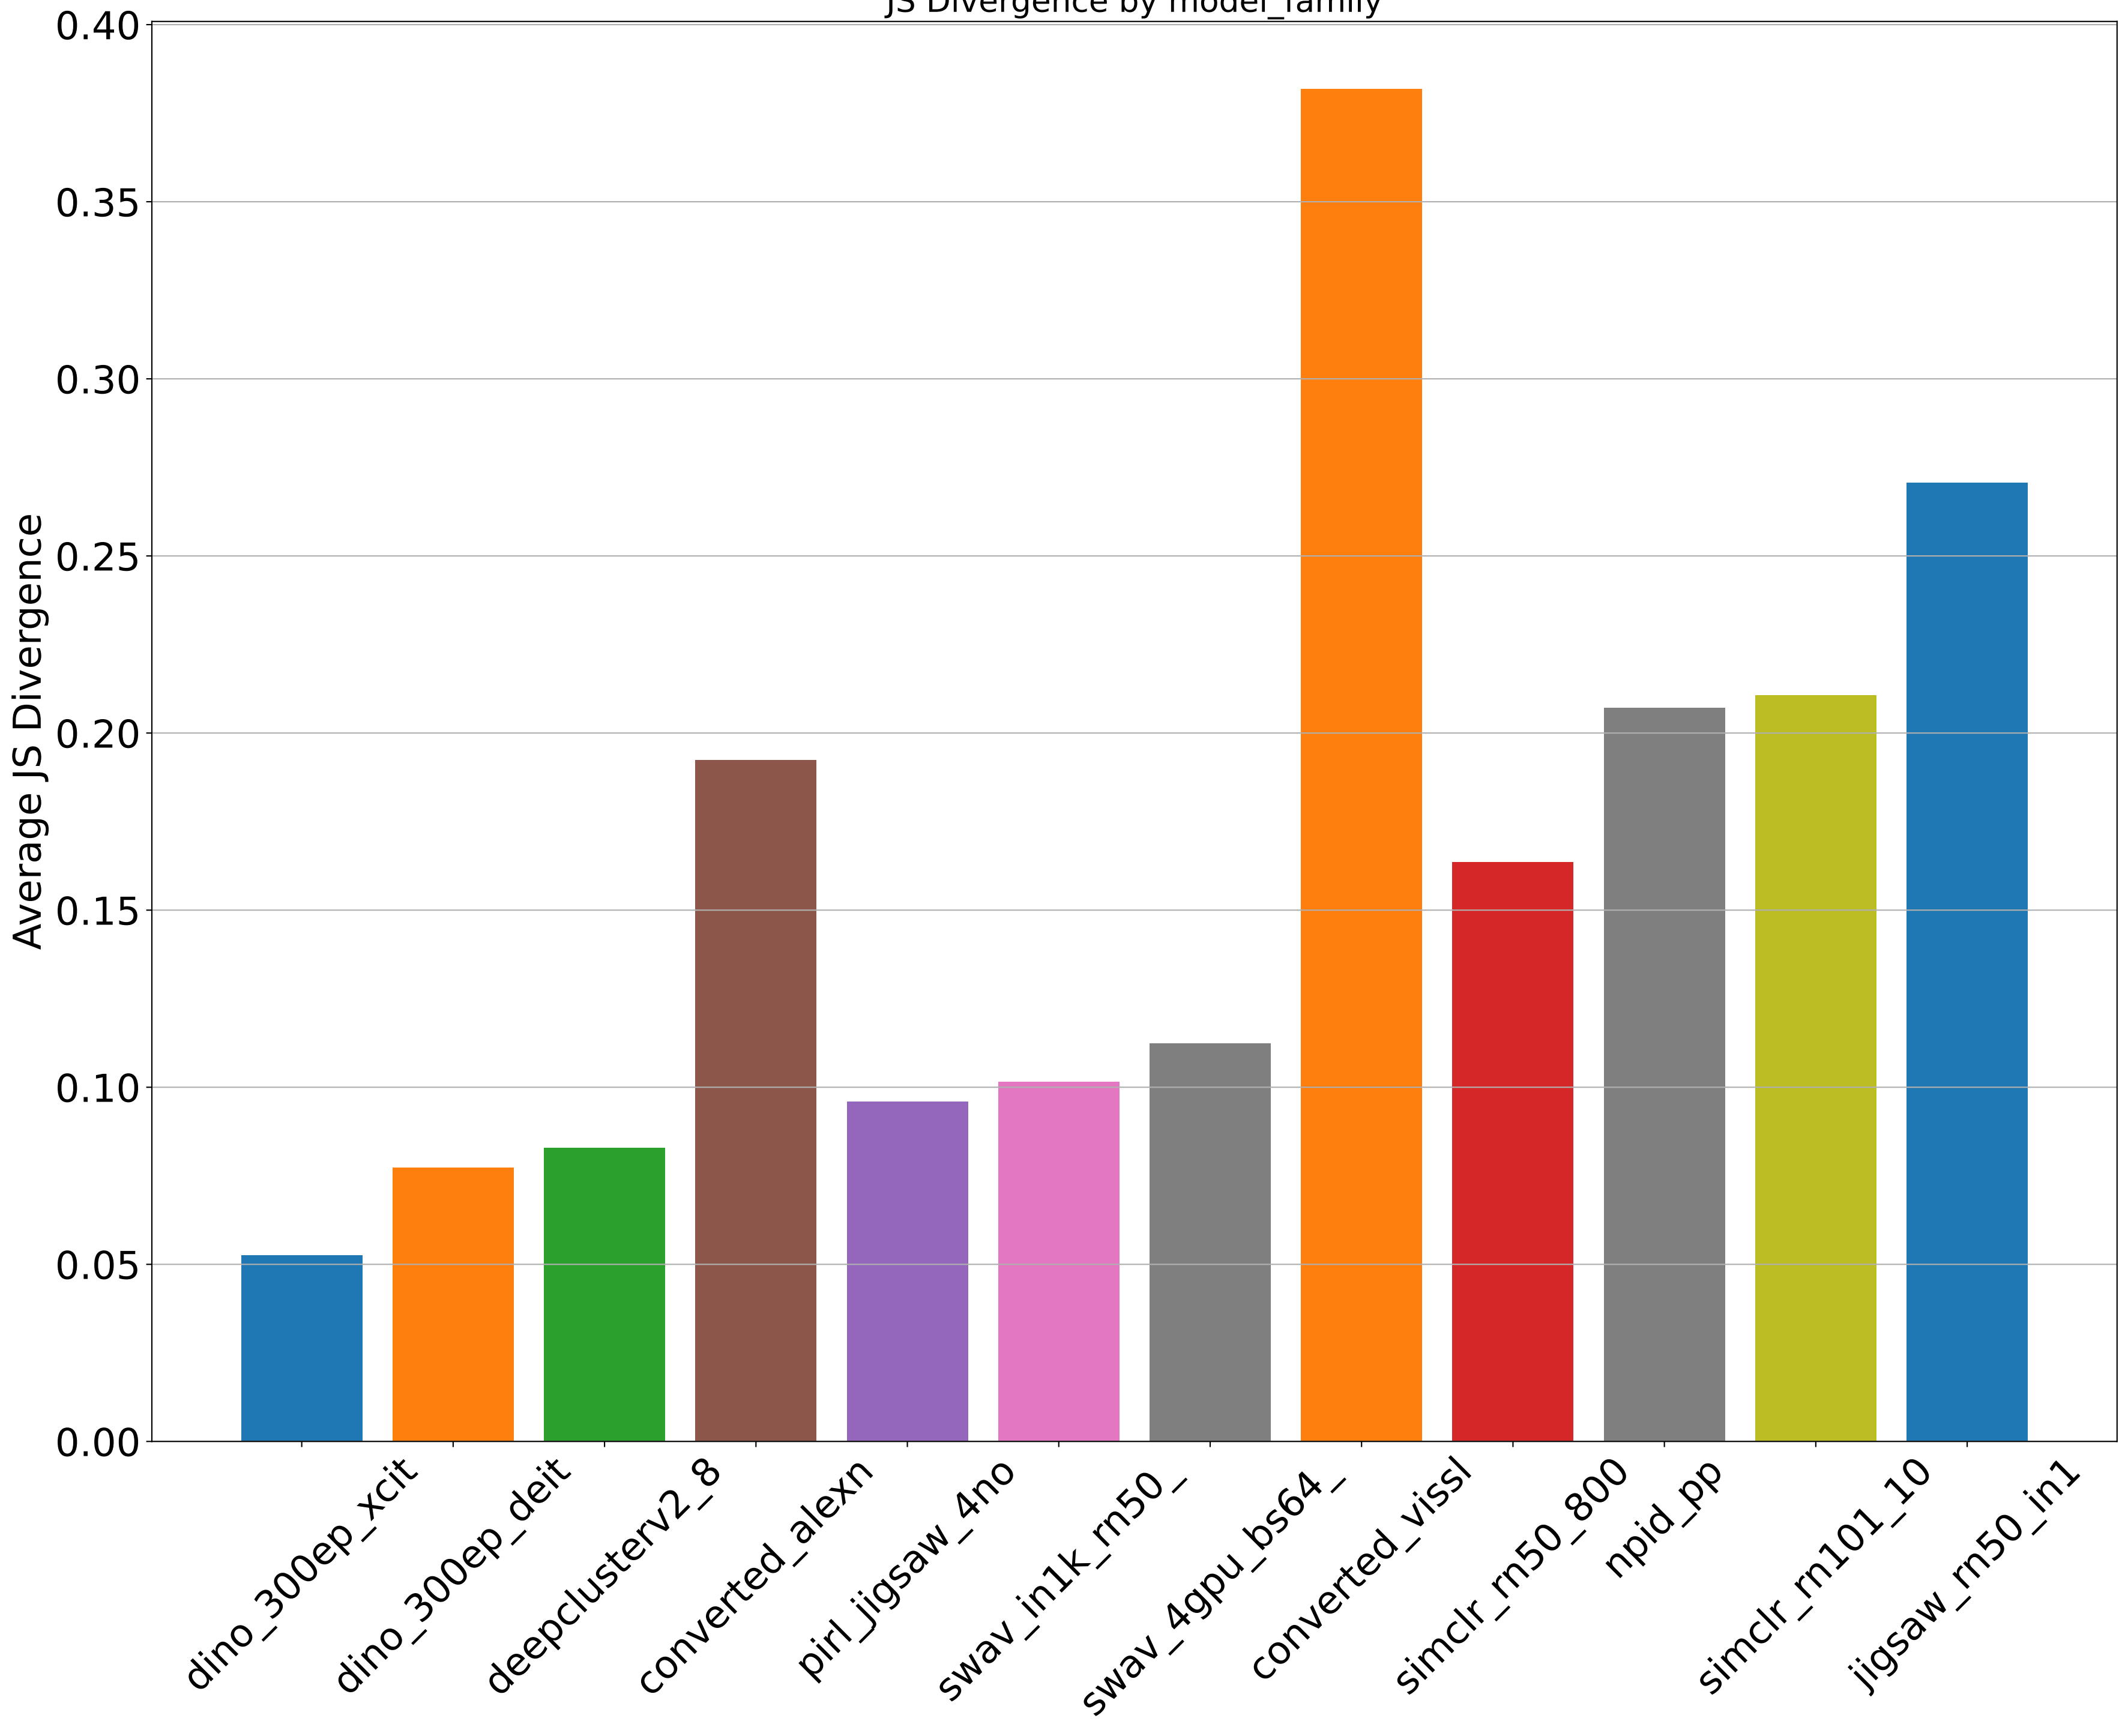

Supplement: supplementary_material [file js_divergence_model_family.pdf › adversarial_for_icml/figures/js_div/js_divergence_model_family.pdf]

JS Divergence by proxy\_dataset\_name

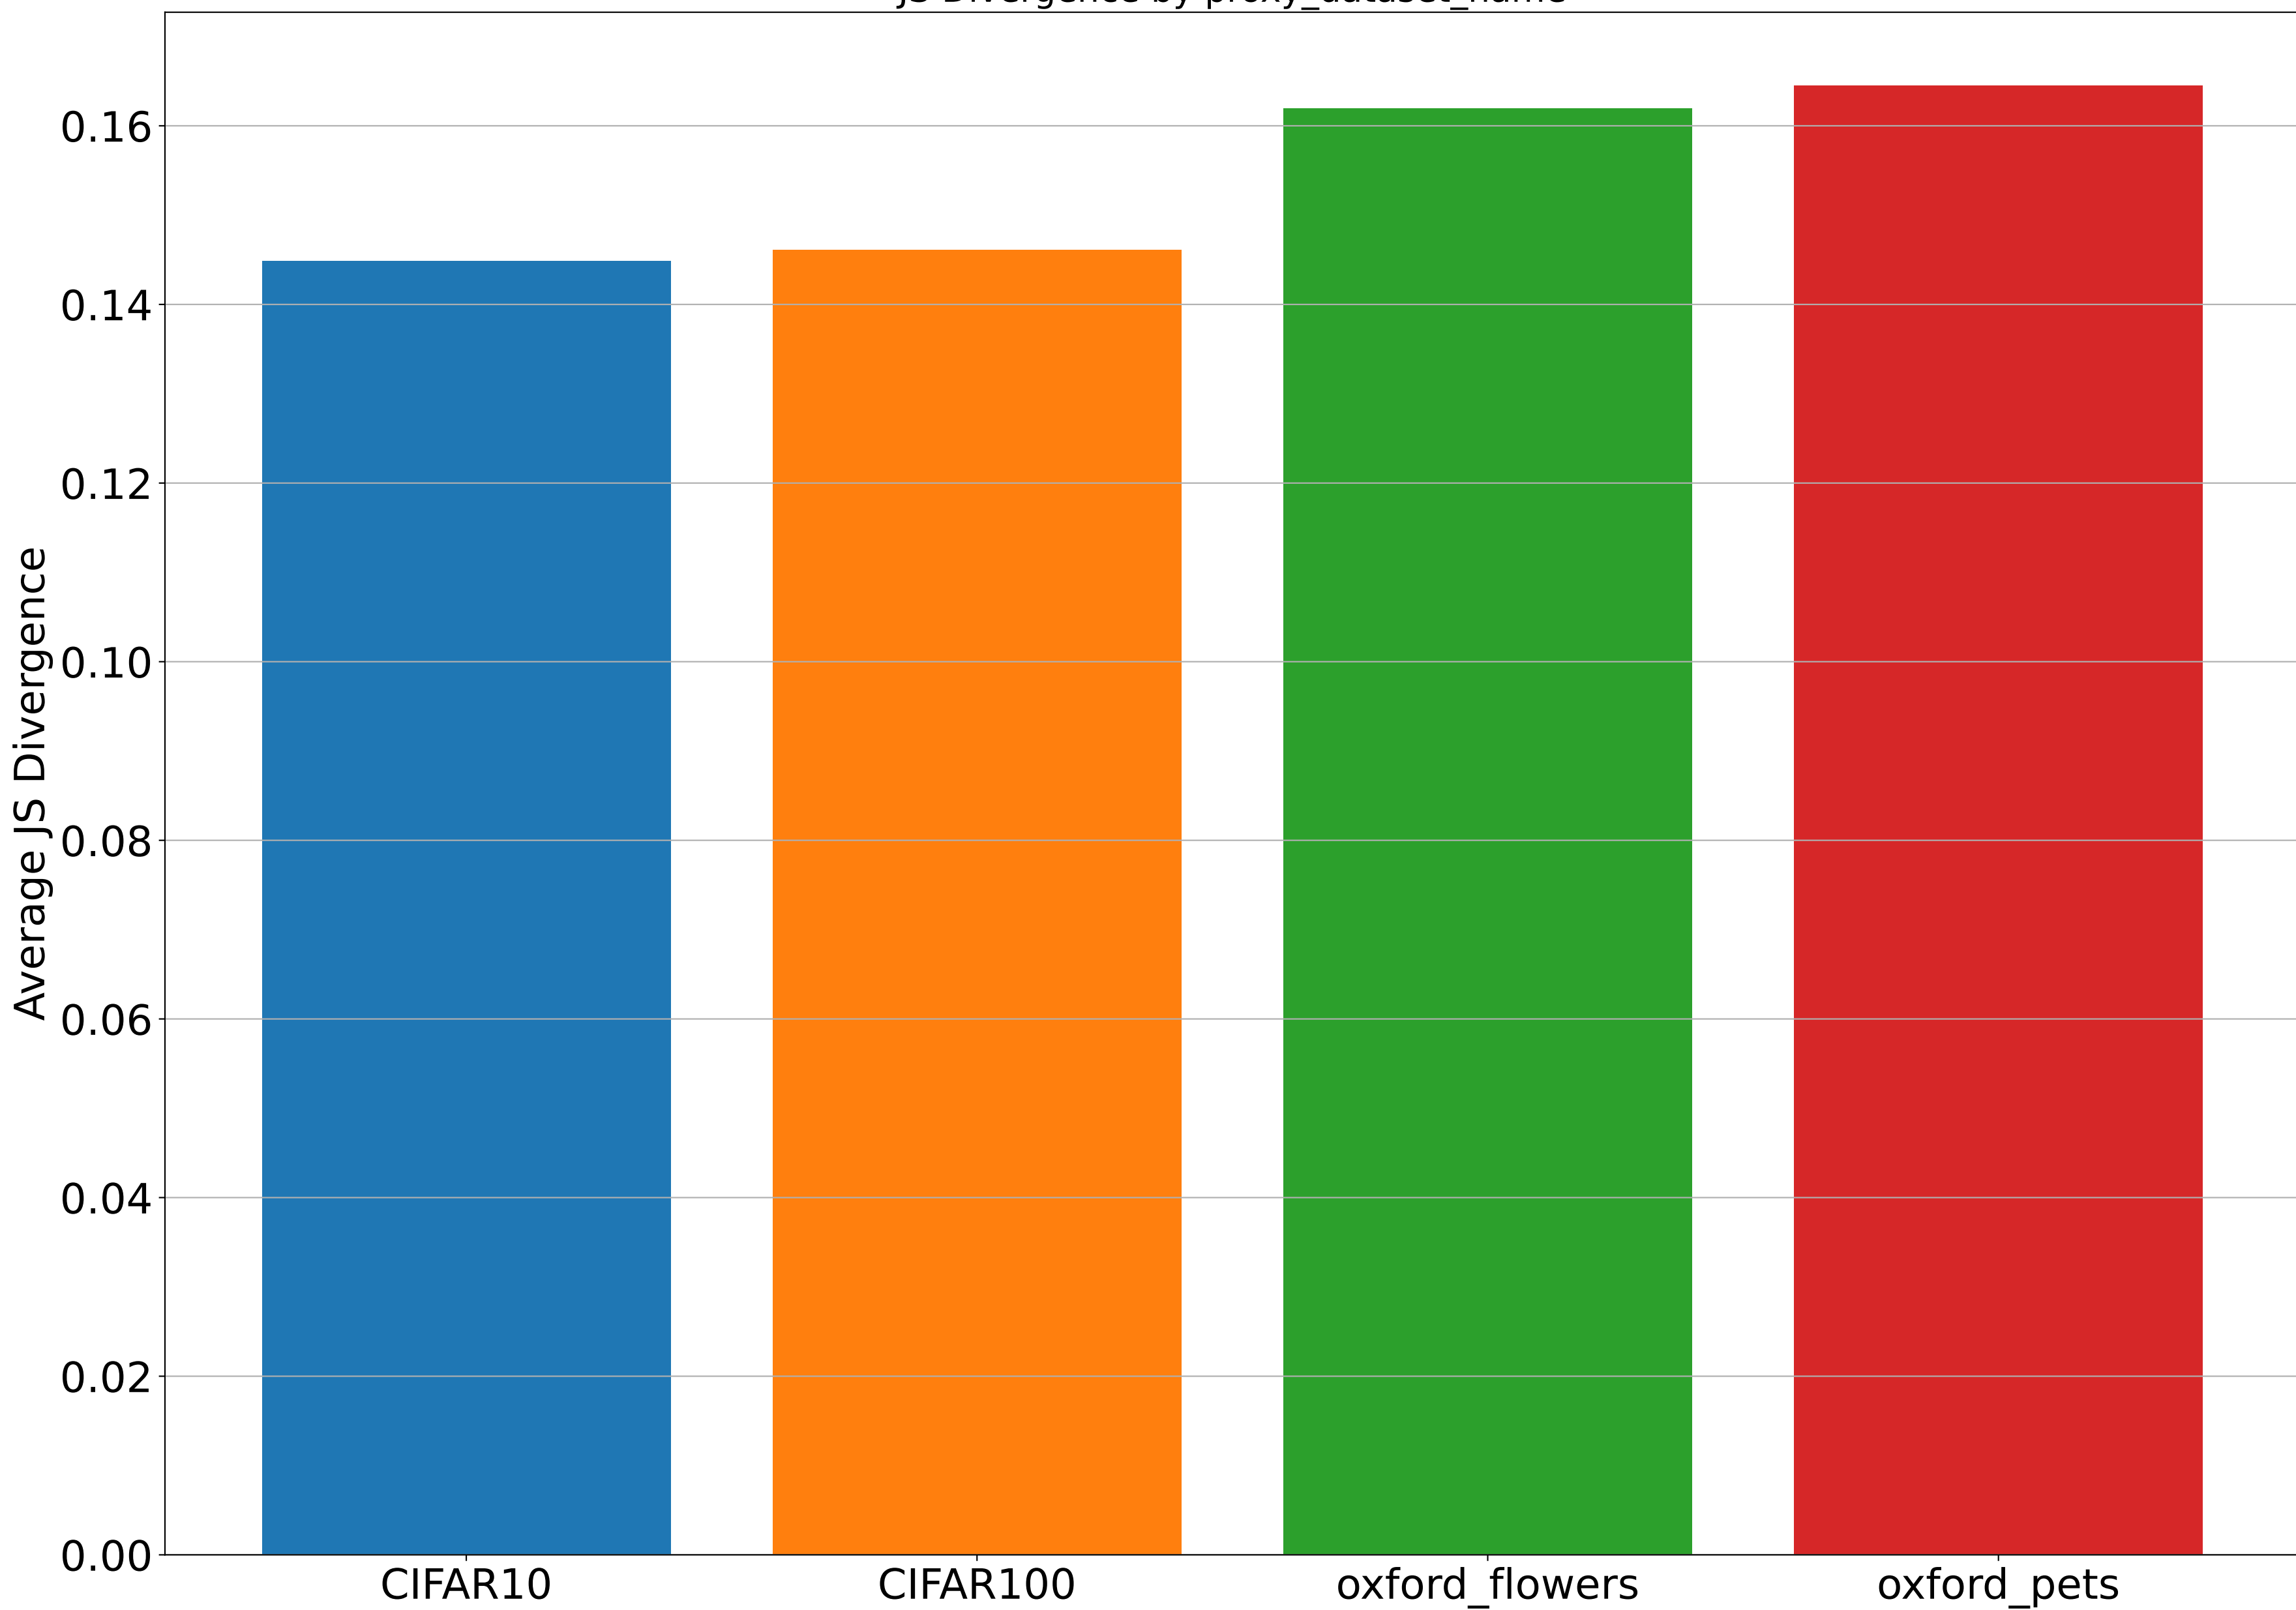

Supplement: supplementary_material [file js_divergence_proxy_dataset_name.pdf › adversarial_for_icml/figures/js_div/js_divergence_proxy_dataset_name.pdf]

JS Divergence by proxy\_tune\_mode

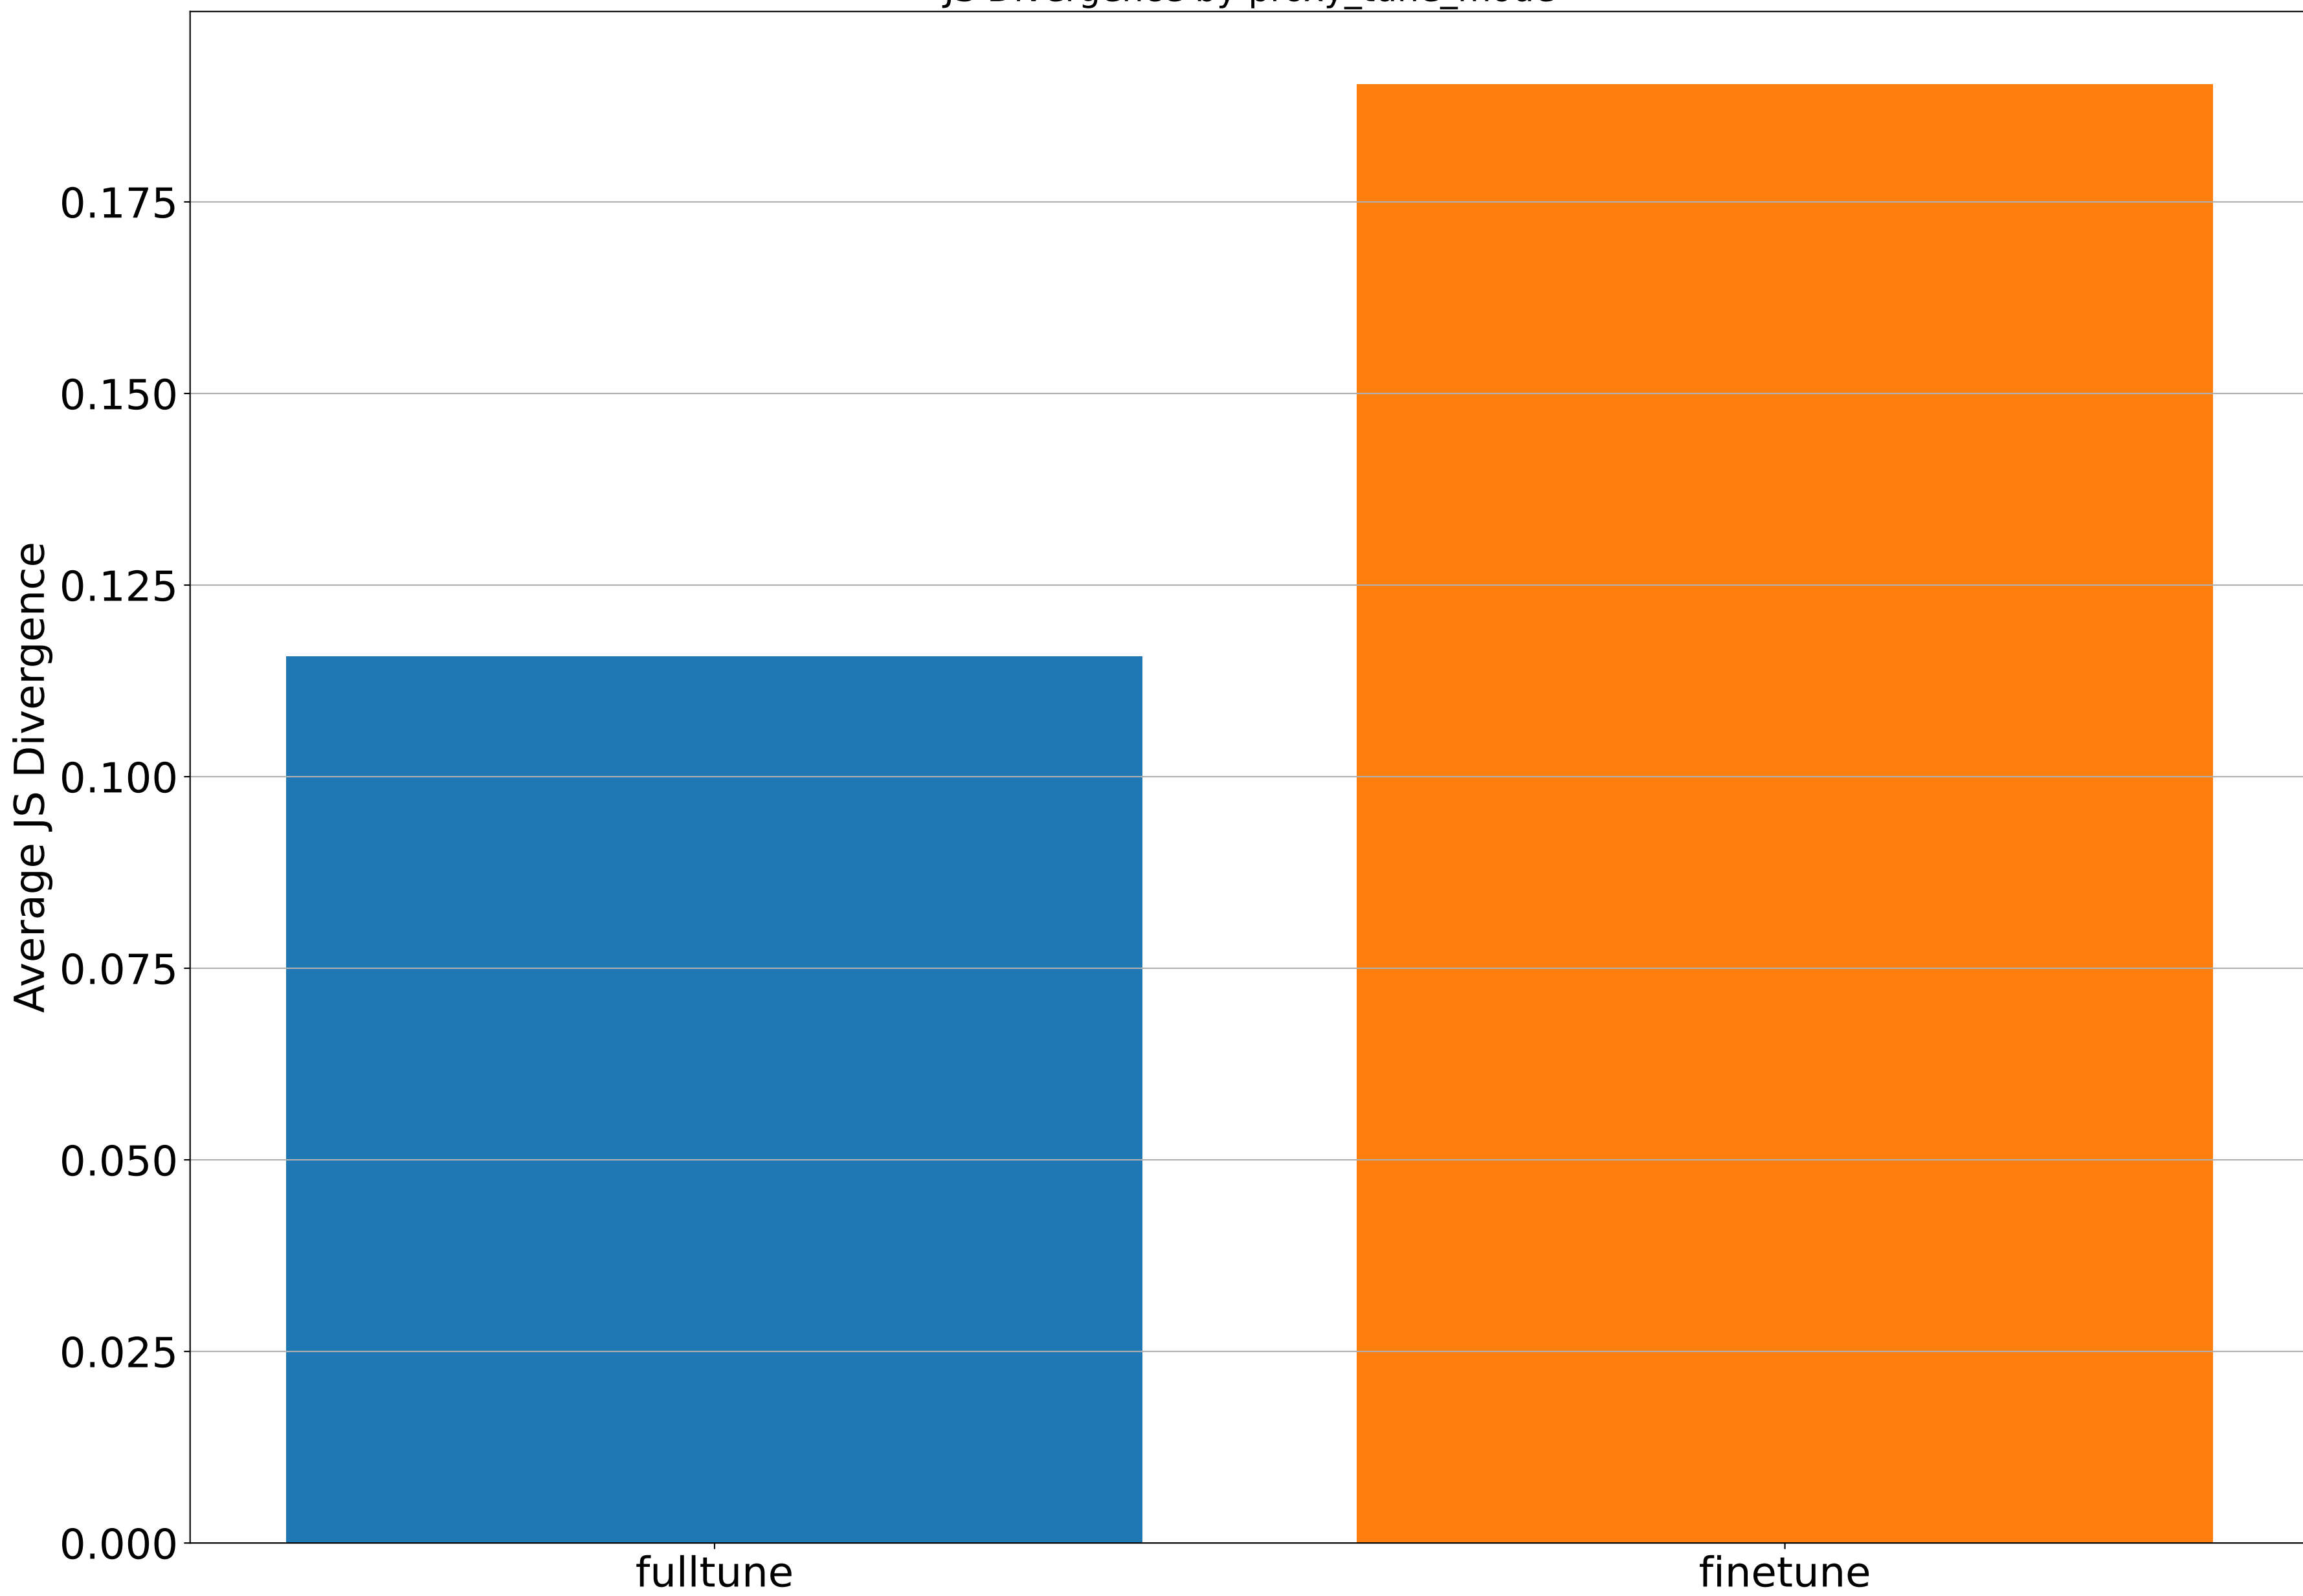

Supplement: supplementary_material [file js_divergence_proxy_tune_mode.pdf › adversarial_for_icml/figures/js_div/js_divergence_proxy_tune_mode.pdf]

JS Divergence by target\_dataset\_name

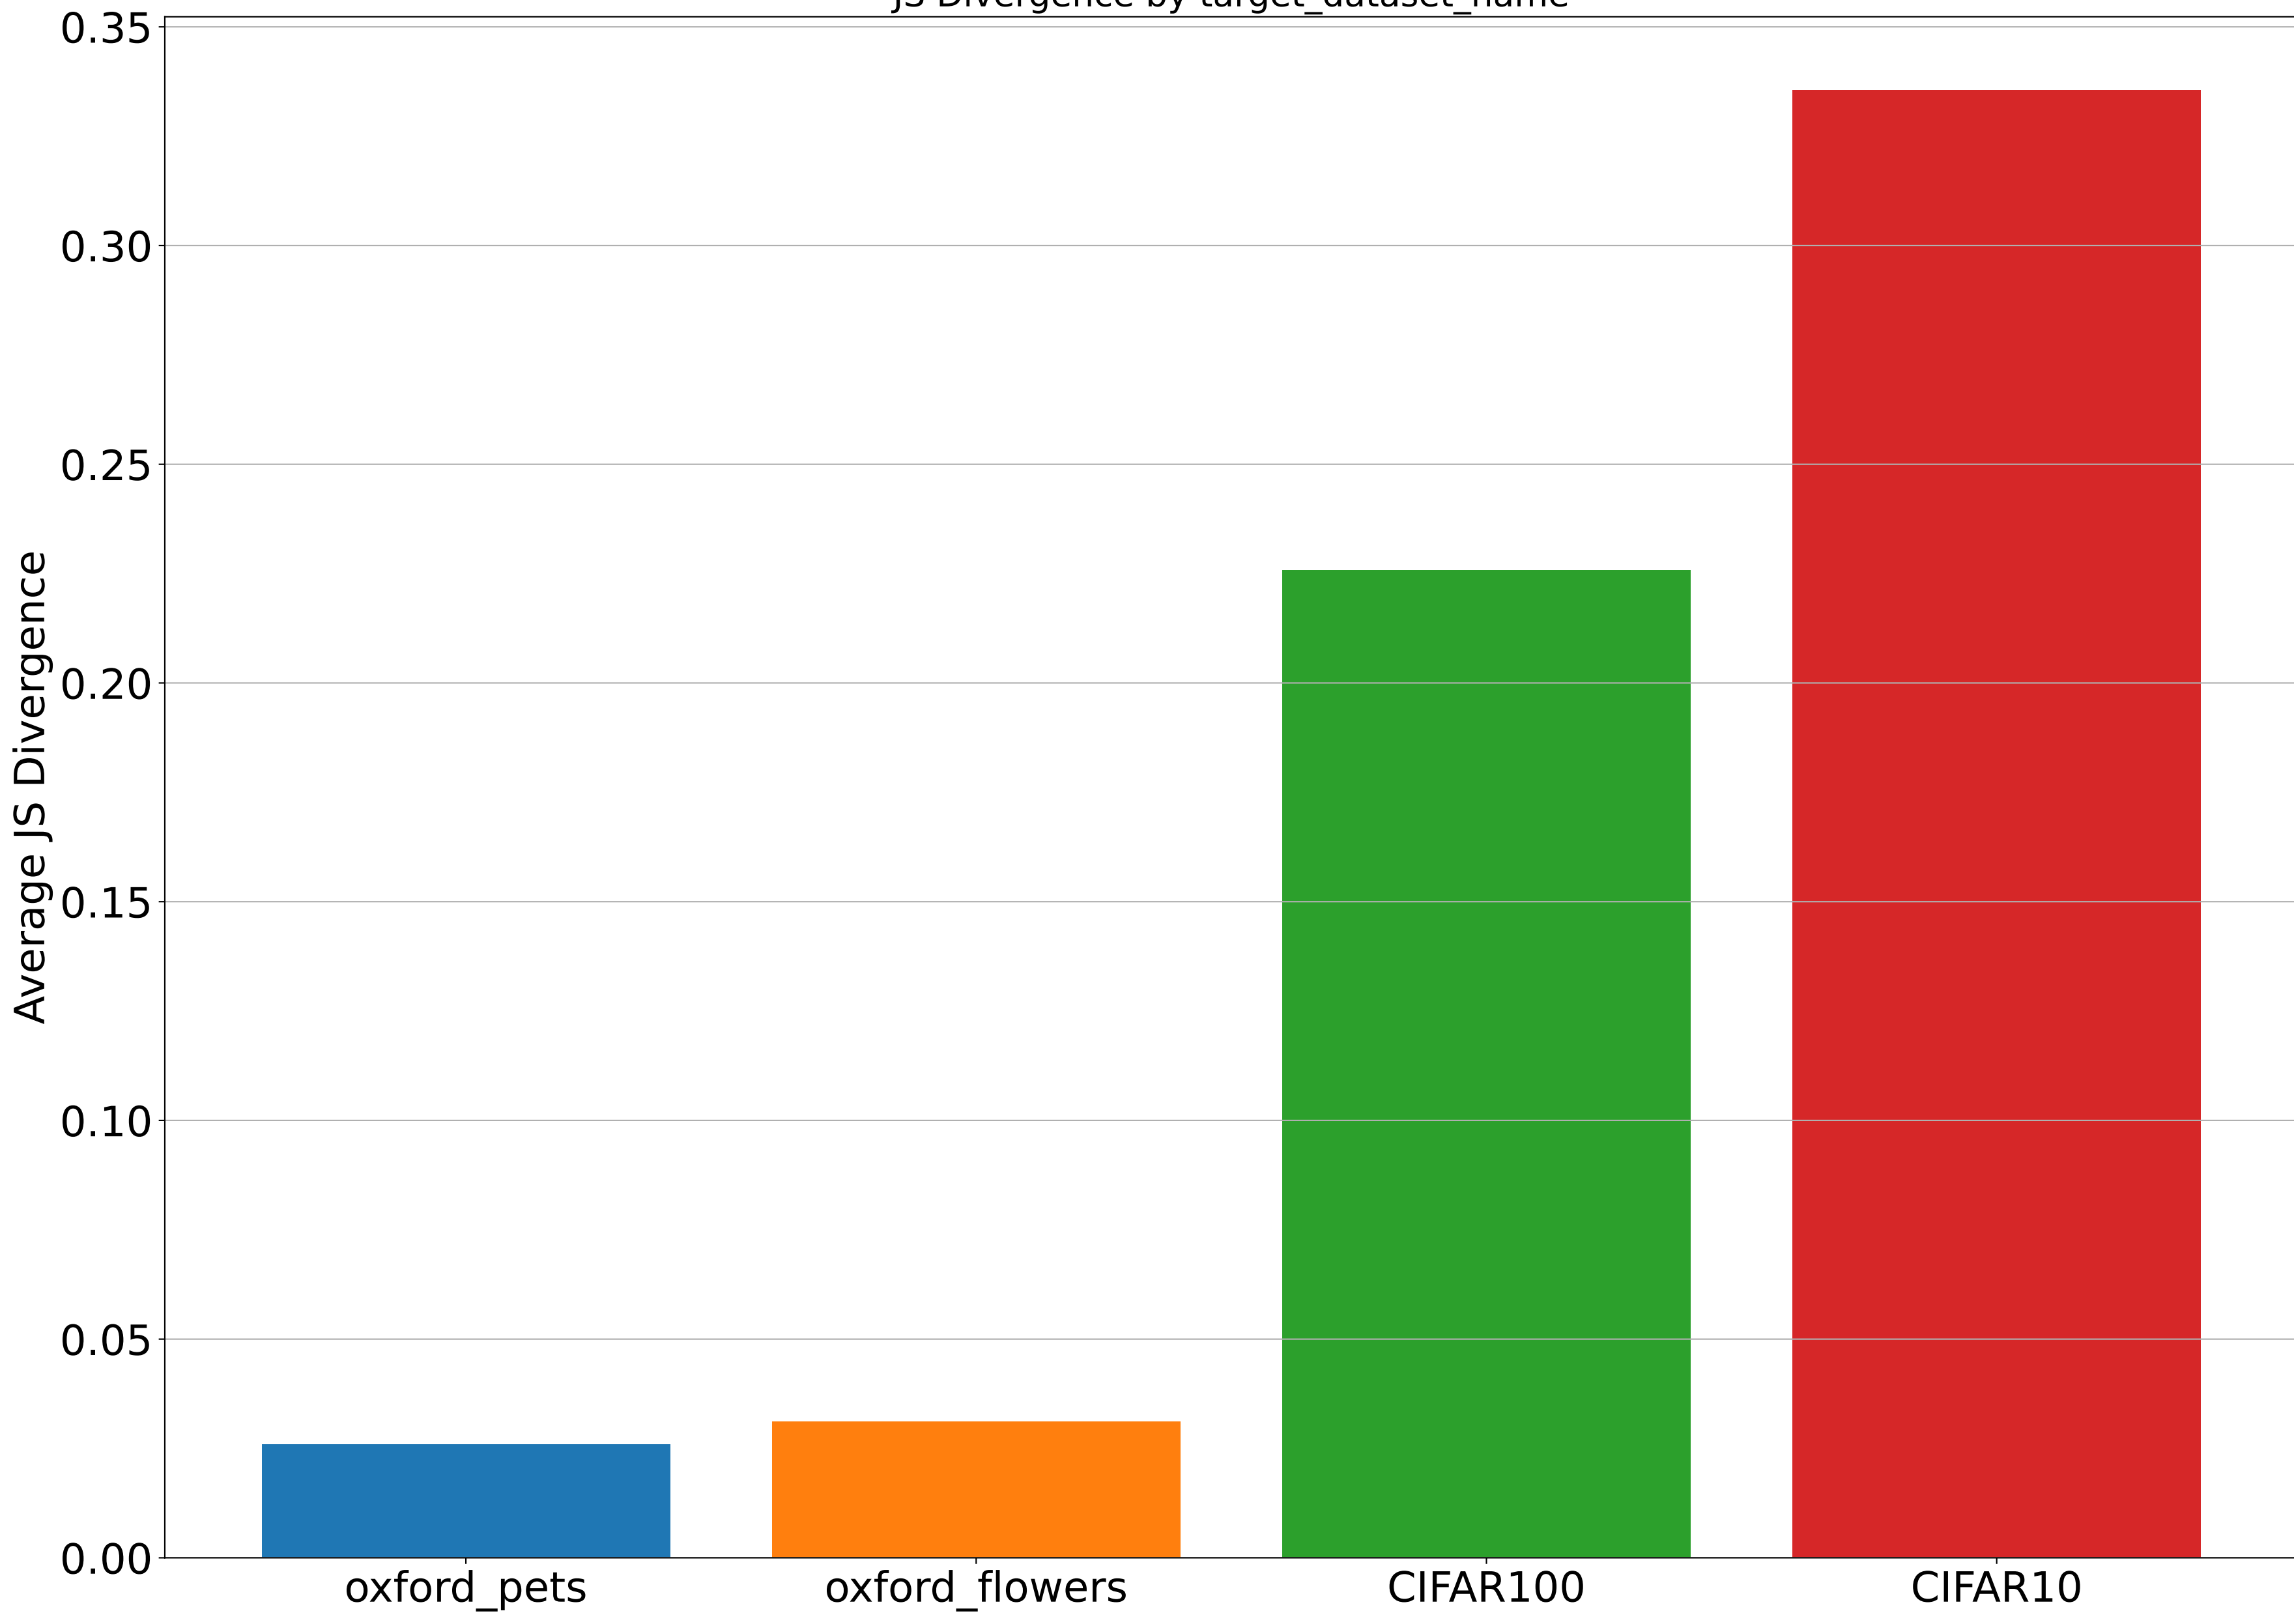

Supplement: supplementary_material [file js_divergence_target_dataset_name.pdf › adversarial_for_icml/figures/js_div/js_divergence_target_dataset_name.pdf]

JS Divergence by target\_tune\_mode

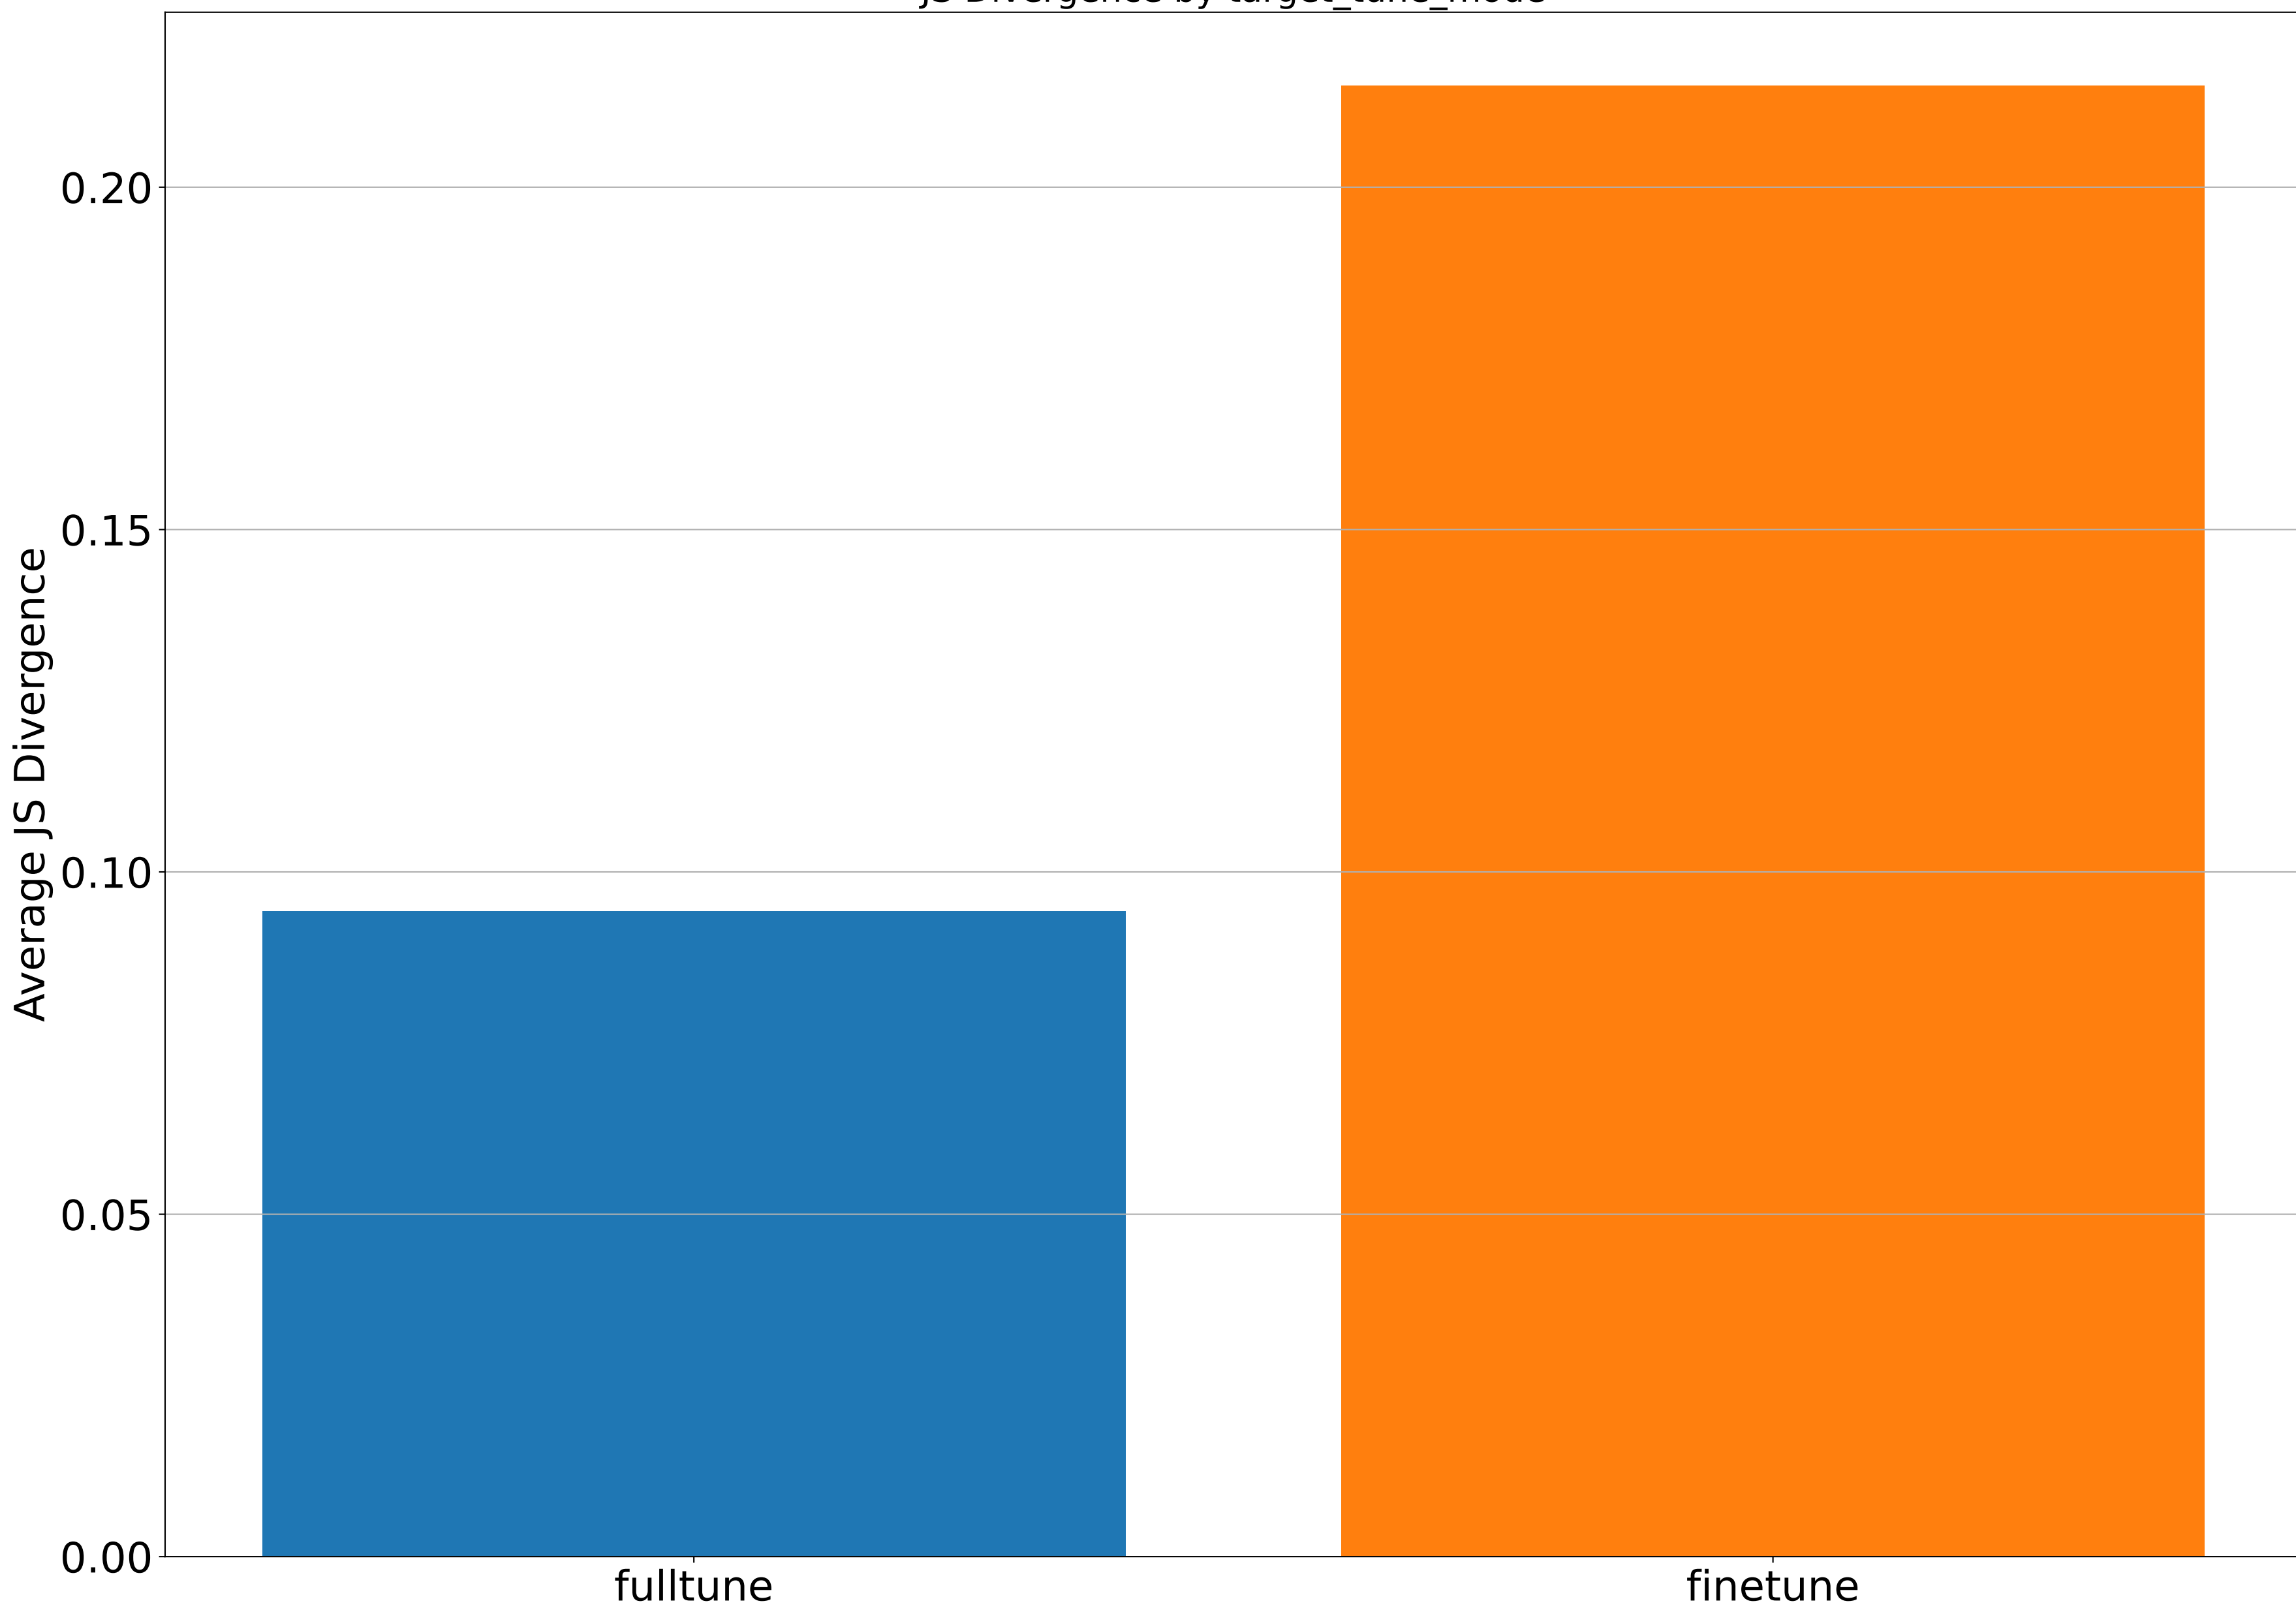

Supplement: supplementary_material [file js_divergence_target_tune_mode.pdf › adversarial_for_icml/figures/js_div/js_divergence_target_tune_mode.pdf]

JS Divergence by attack\_name



Supplement: supplementary_material [file js_divergence_attack_name.pdf › adversarial_for_icml/figures/js_divergence_attack_name.pdf]

JS Divergence by diff\_type

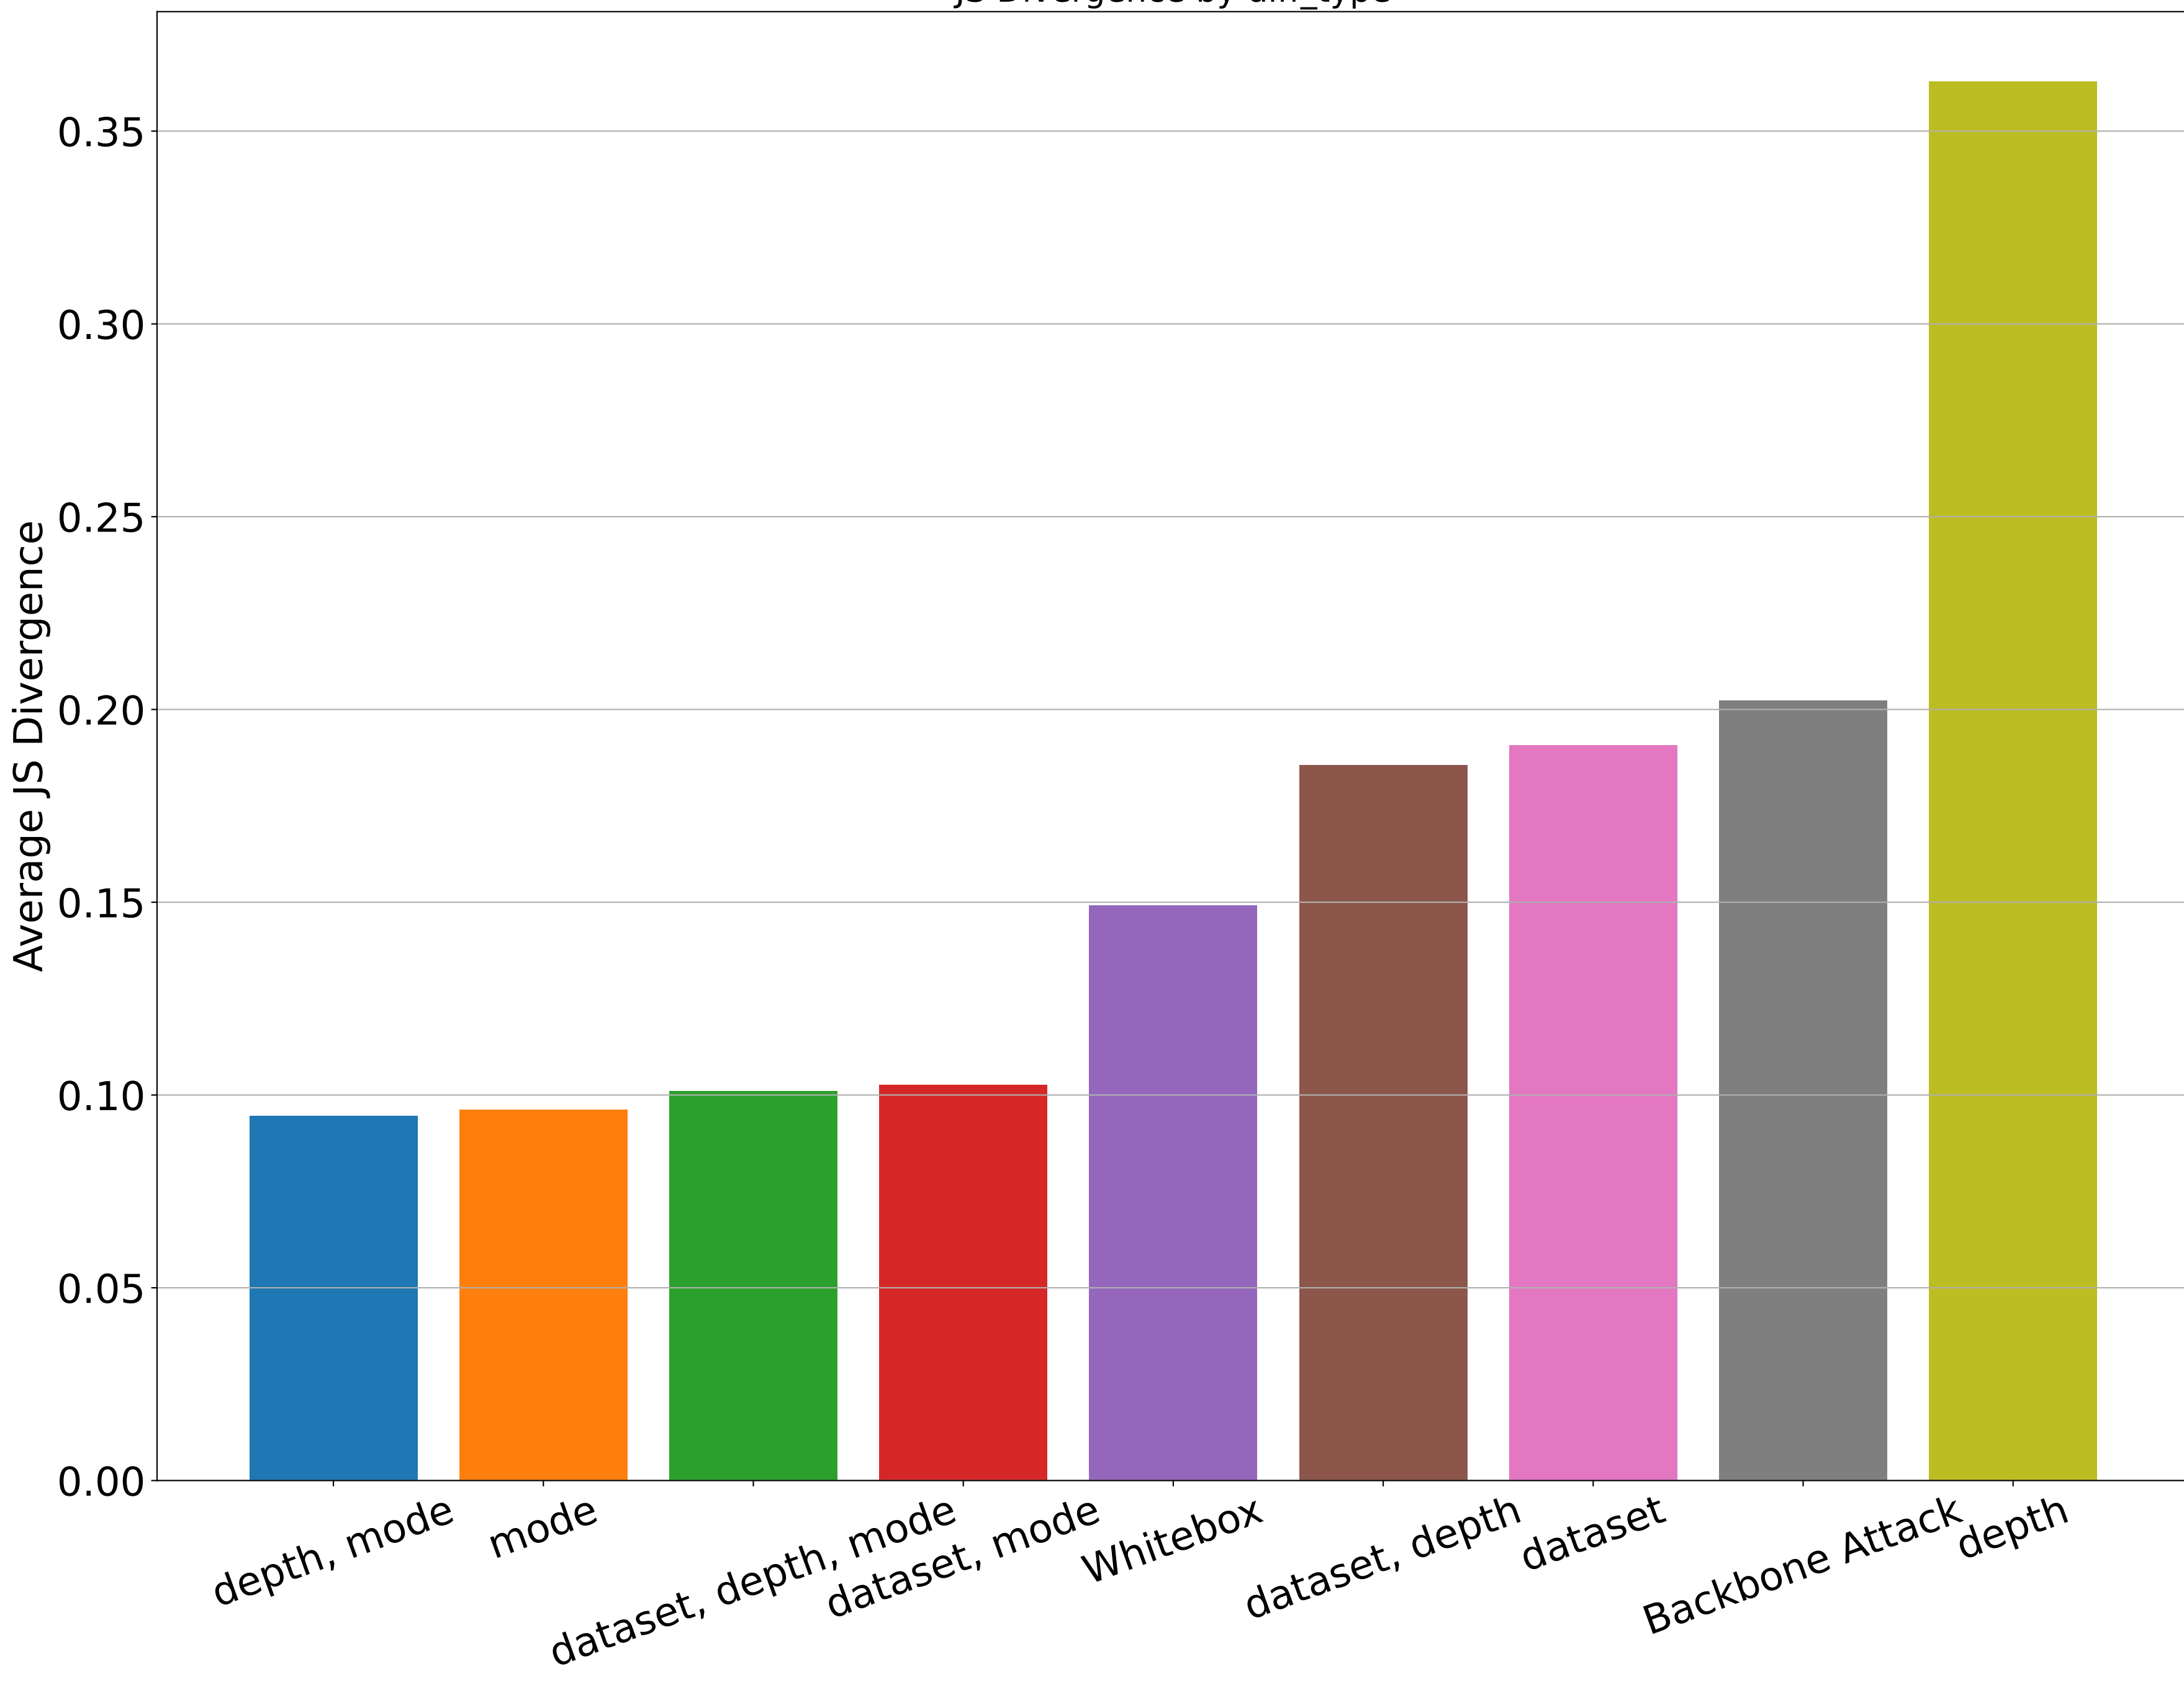

Supplement: supplementary_material [file js_divergence_diff_type.pdf › adversarial_for_icml/figures/js_divergence_diff_type.pdf]

JS Divergence by model\_family



Supplement: supplementary_material [file js_divergence_model_family.pdf › adversarial_for_icml/figures/js_divergence_model_family.pdf]

JS Divergence by proxy\_dataset\_name



Supplement: supplementary_material [file js_divergence_proxy_dataset_name.pdf › adversarial_for_icml/figures/js_divergence_proxy_dataset_name.pdf]

JS Divergence by proxy\_tune\_mode

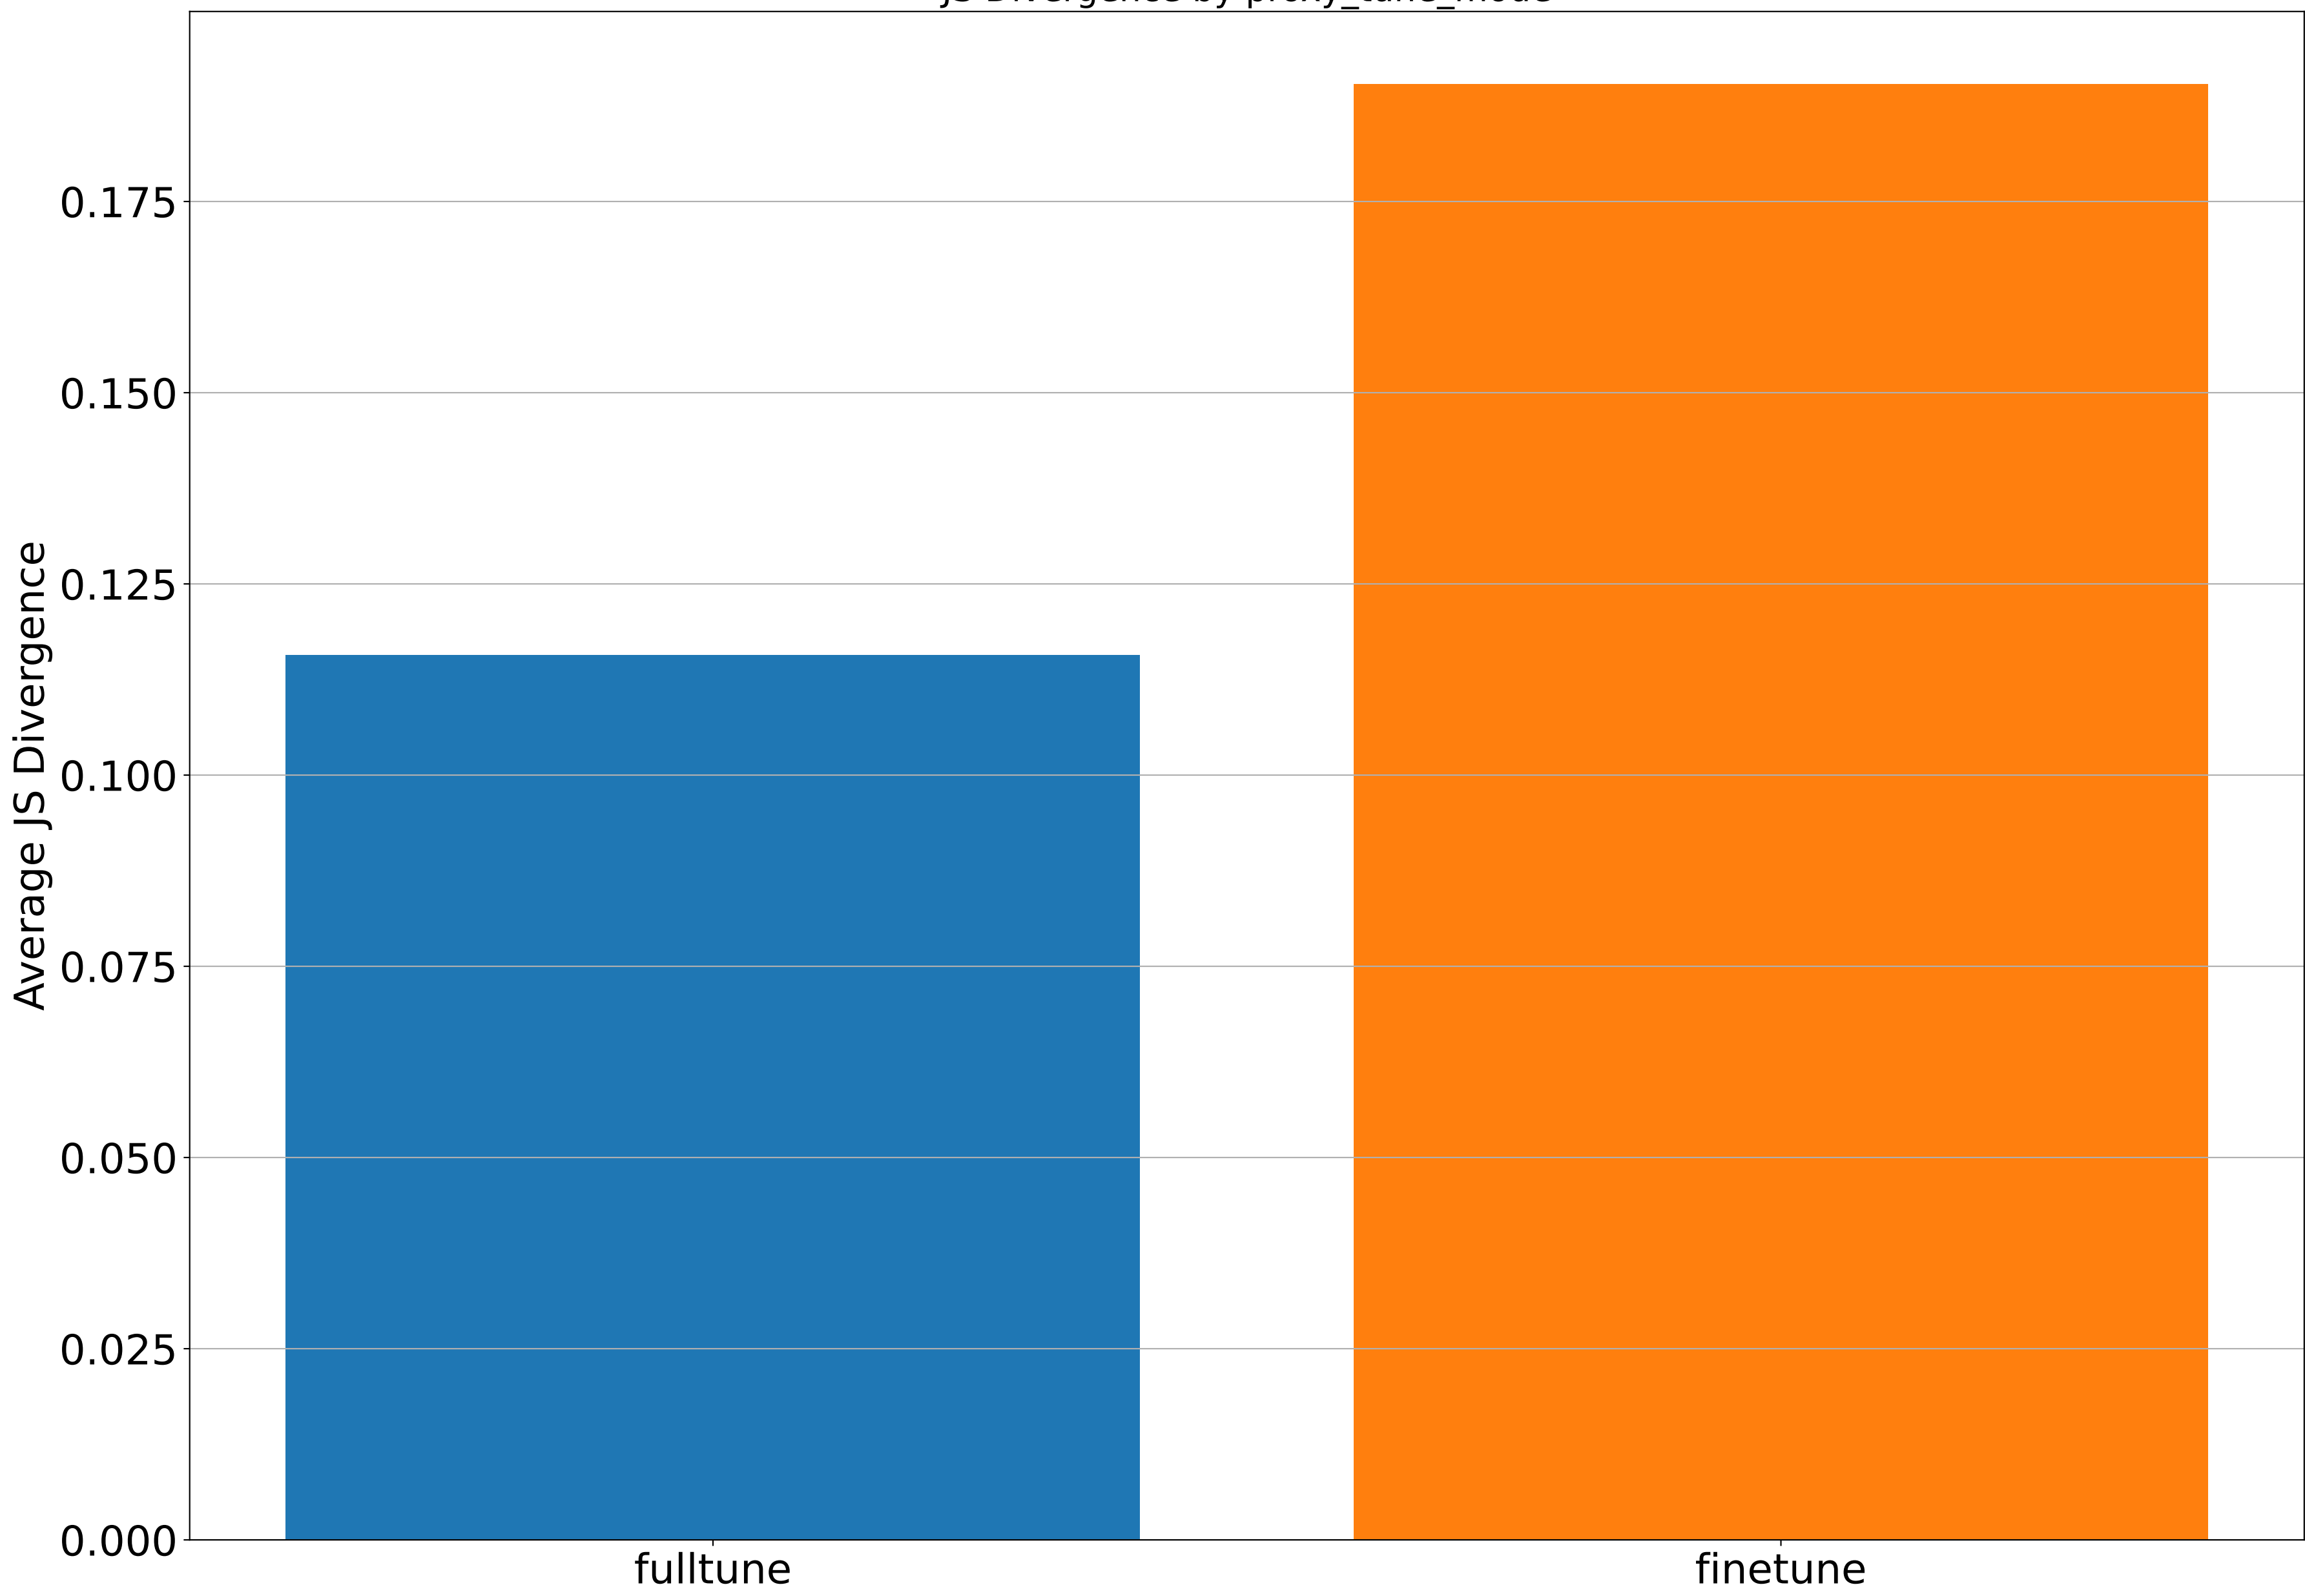

Supplement: supplementary_material [file js_divergence_proxy_tune_mode.pdf › adversarial_for_icml/figures/js_divergence_proxy_tune_mode.pdf]

JS Divergence by target\_dataset\_name

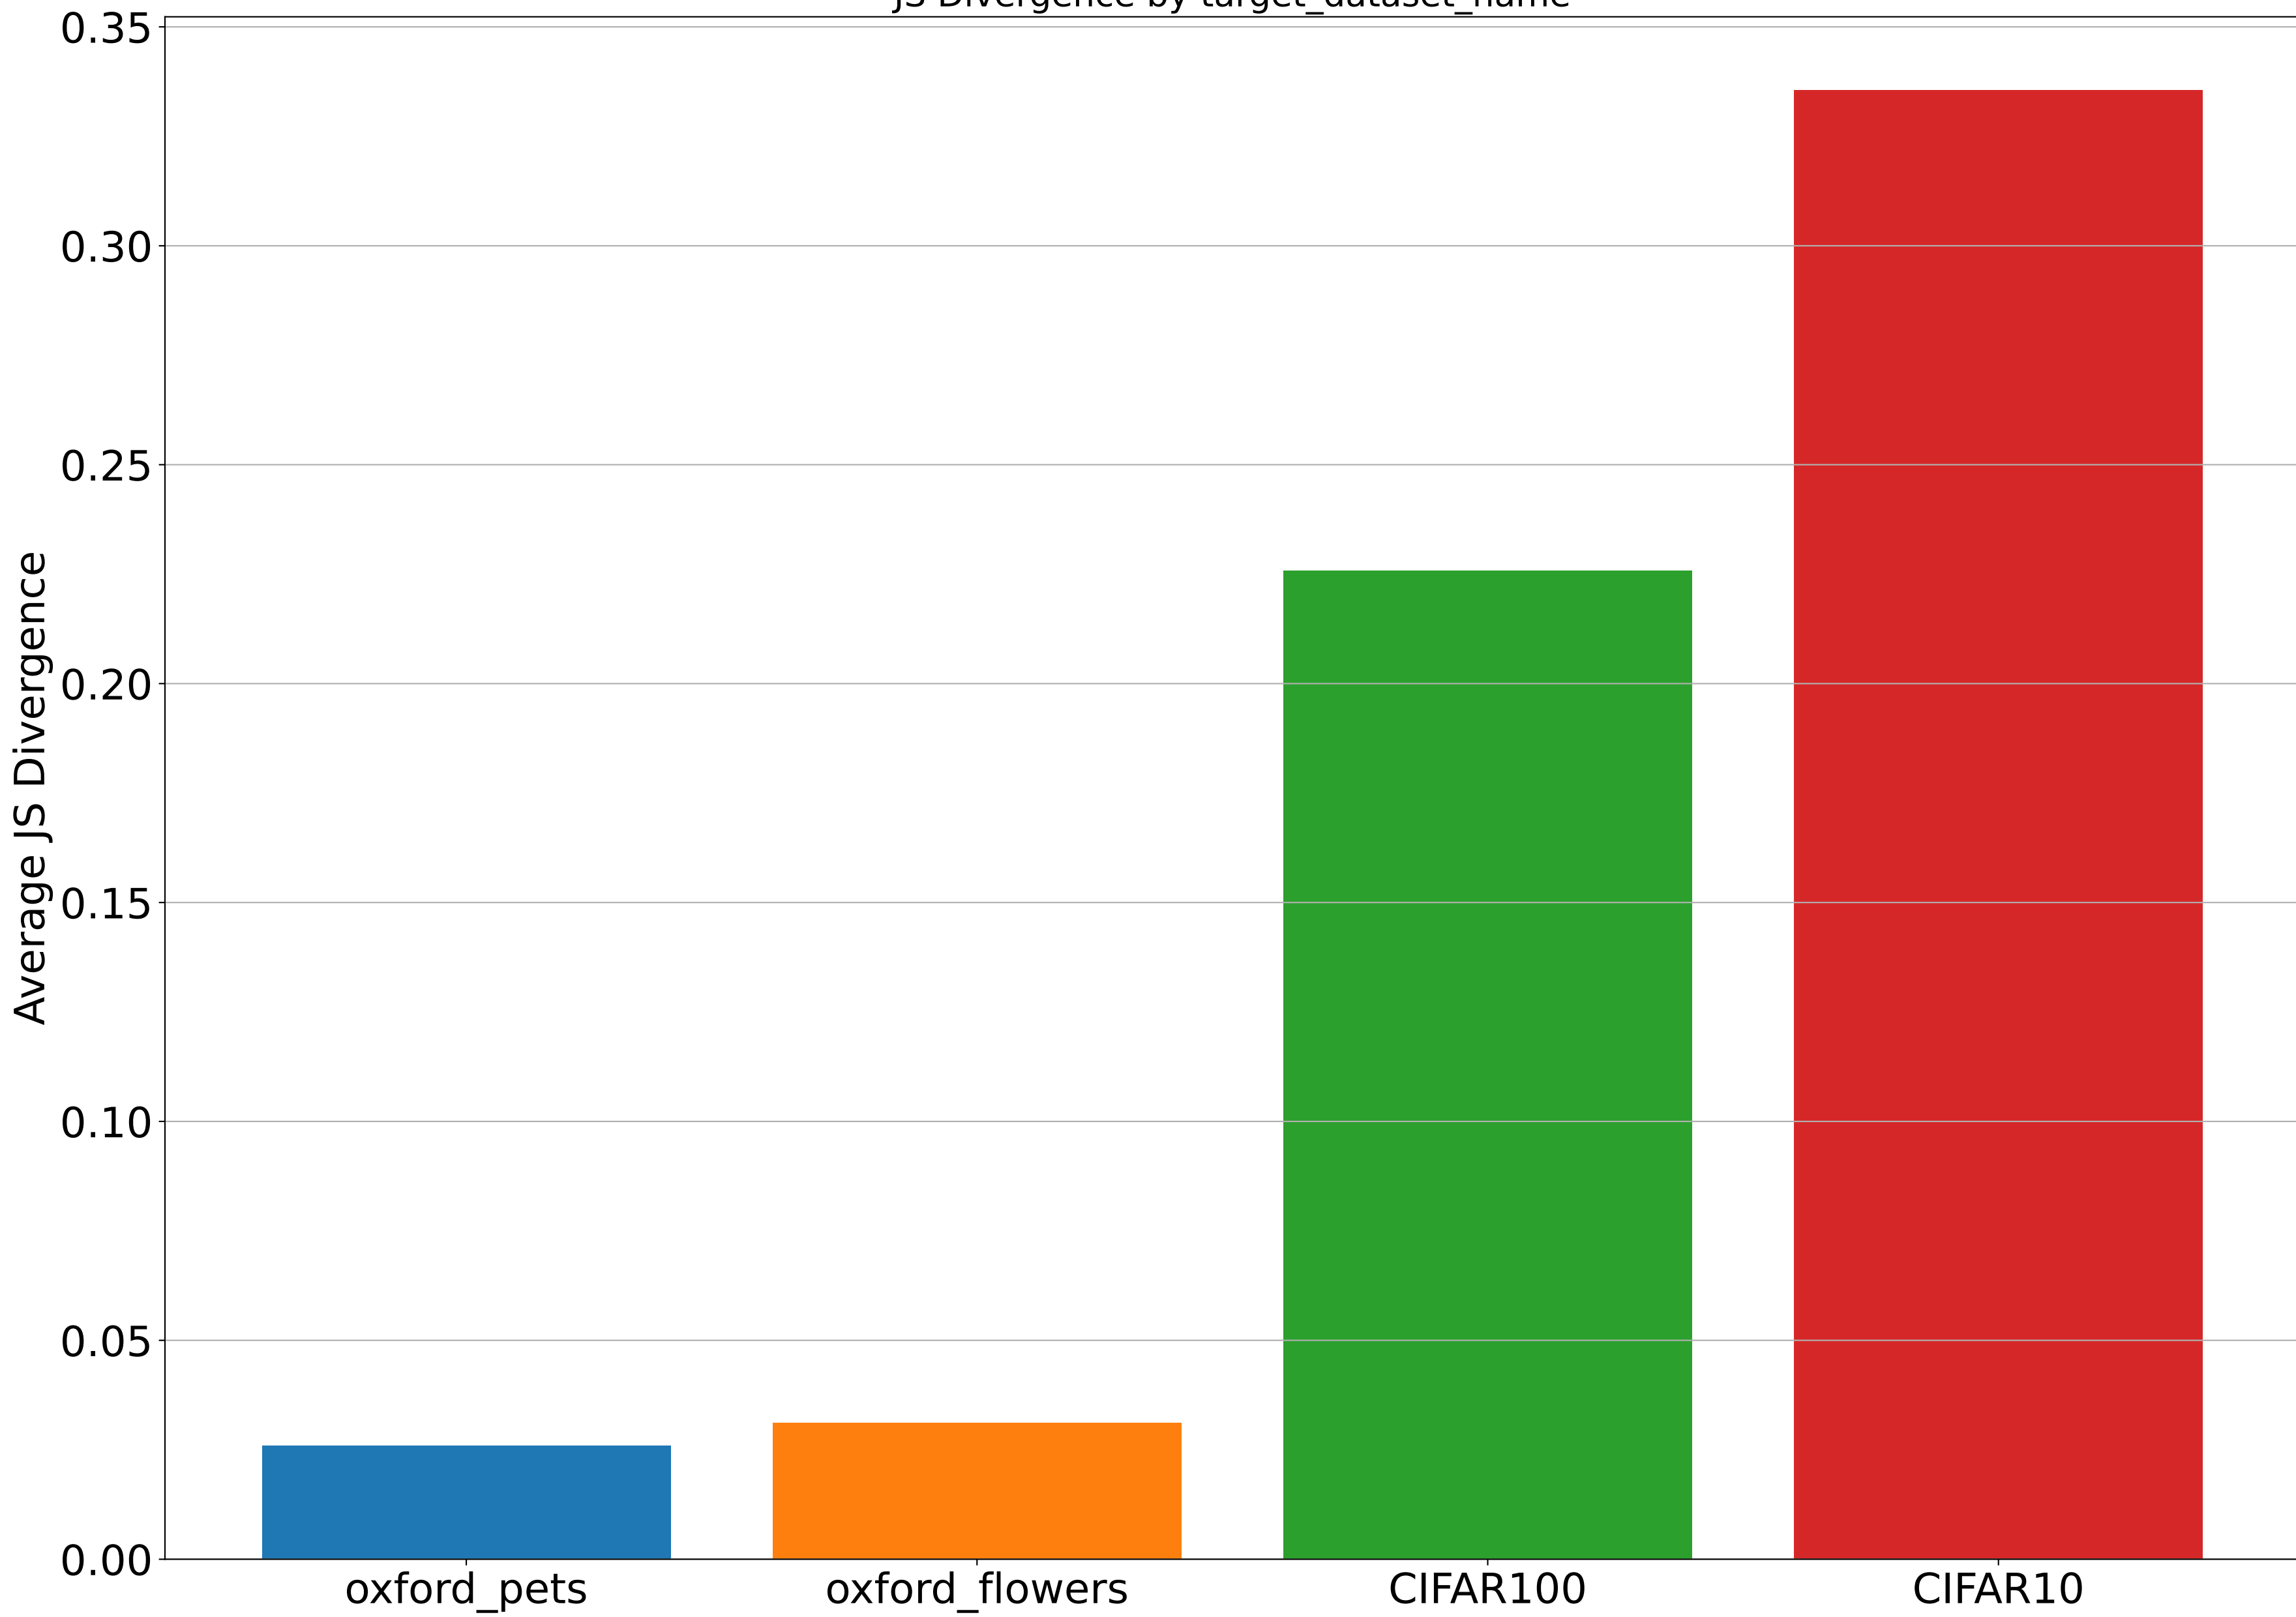

Supplement: supplementary_material [file js_divergence_target_dataset_name.pdf › adversarial_for_icml/figures/js_divergence_target_dataset_name.pdf]

JS Divergence by target\_tune\_mode



Supplement: supplementary_material [file js_divergence_target_tune_mode.pdf › adversarial_for_icml/figures/js_divergence_target_tune_mode.pdf]

Adversarial Transferability For Different Attacks

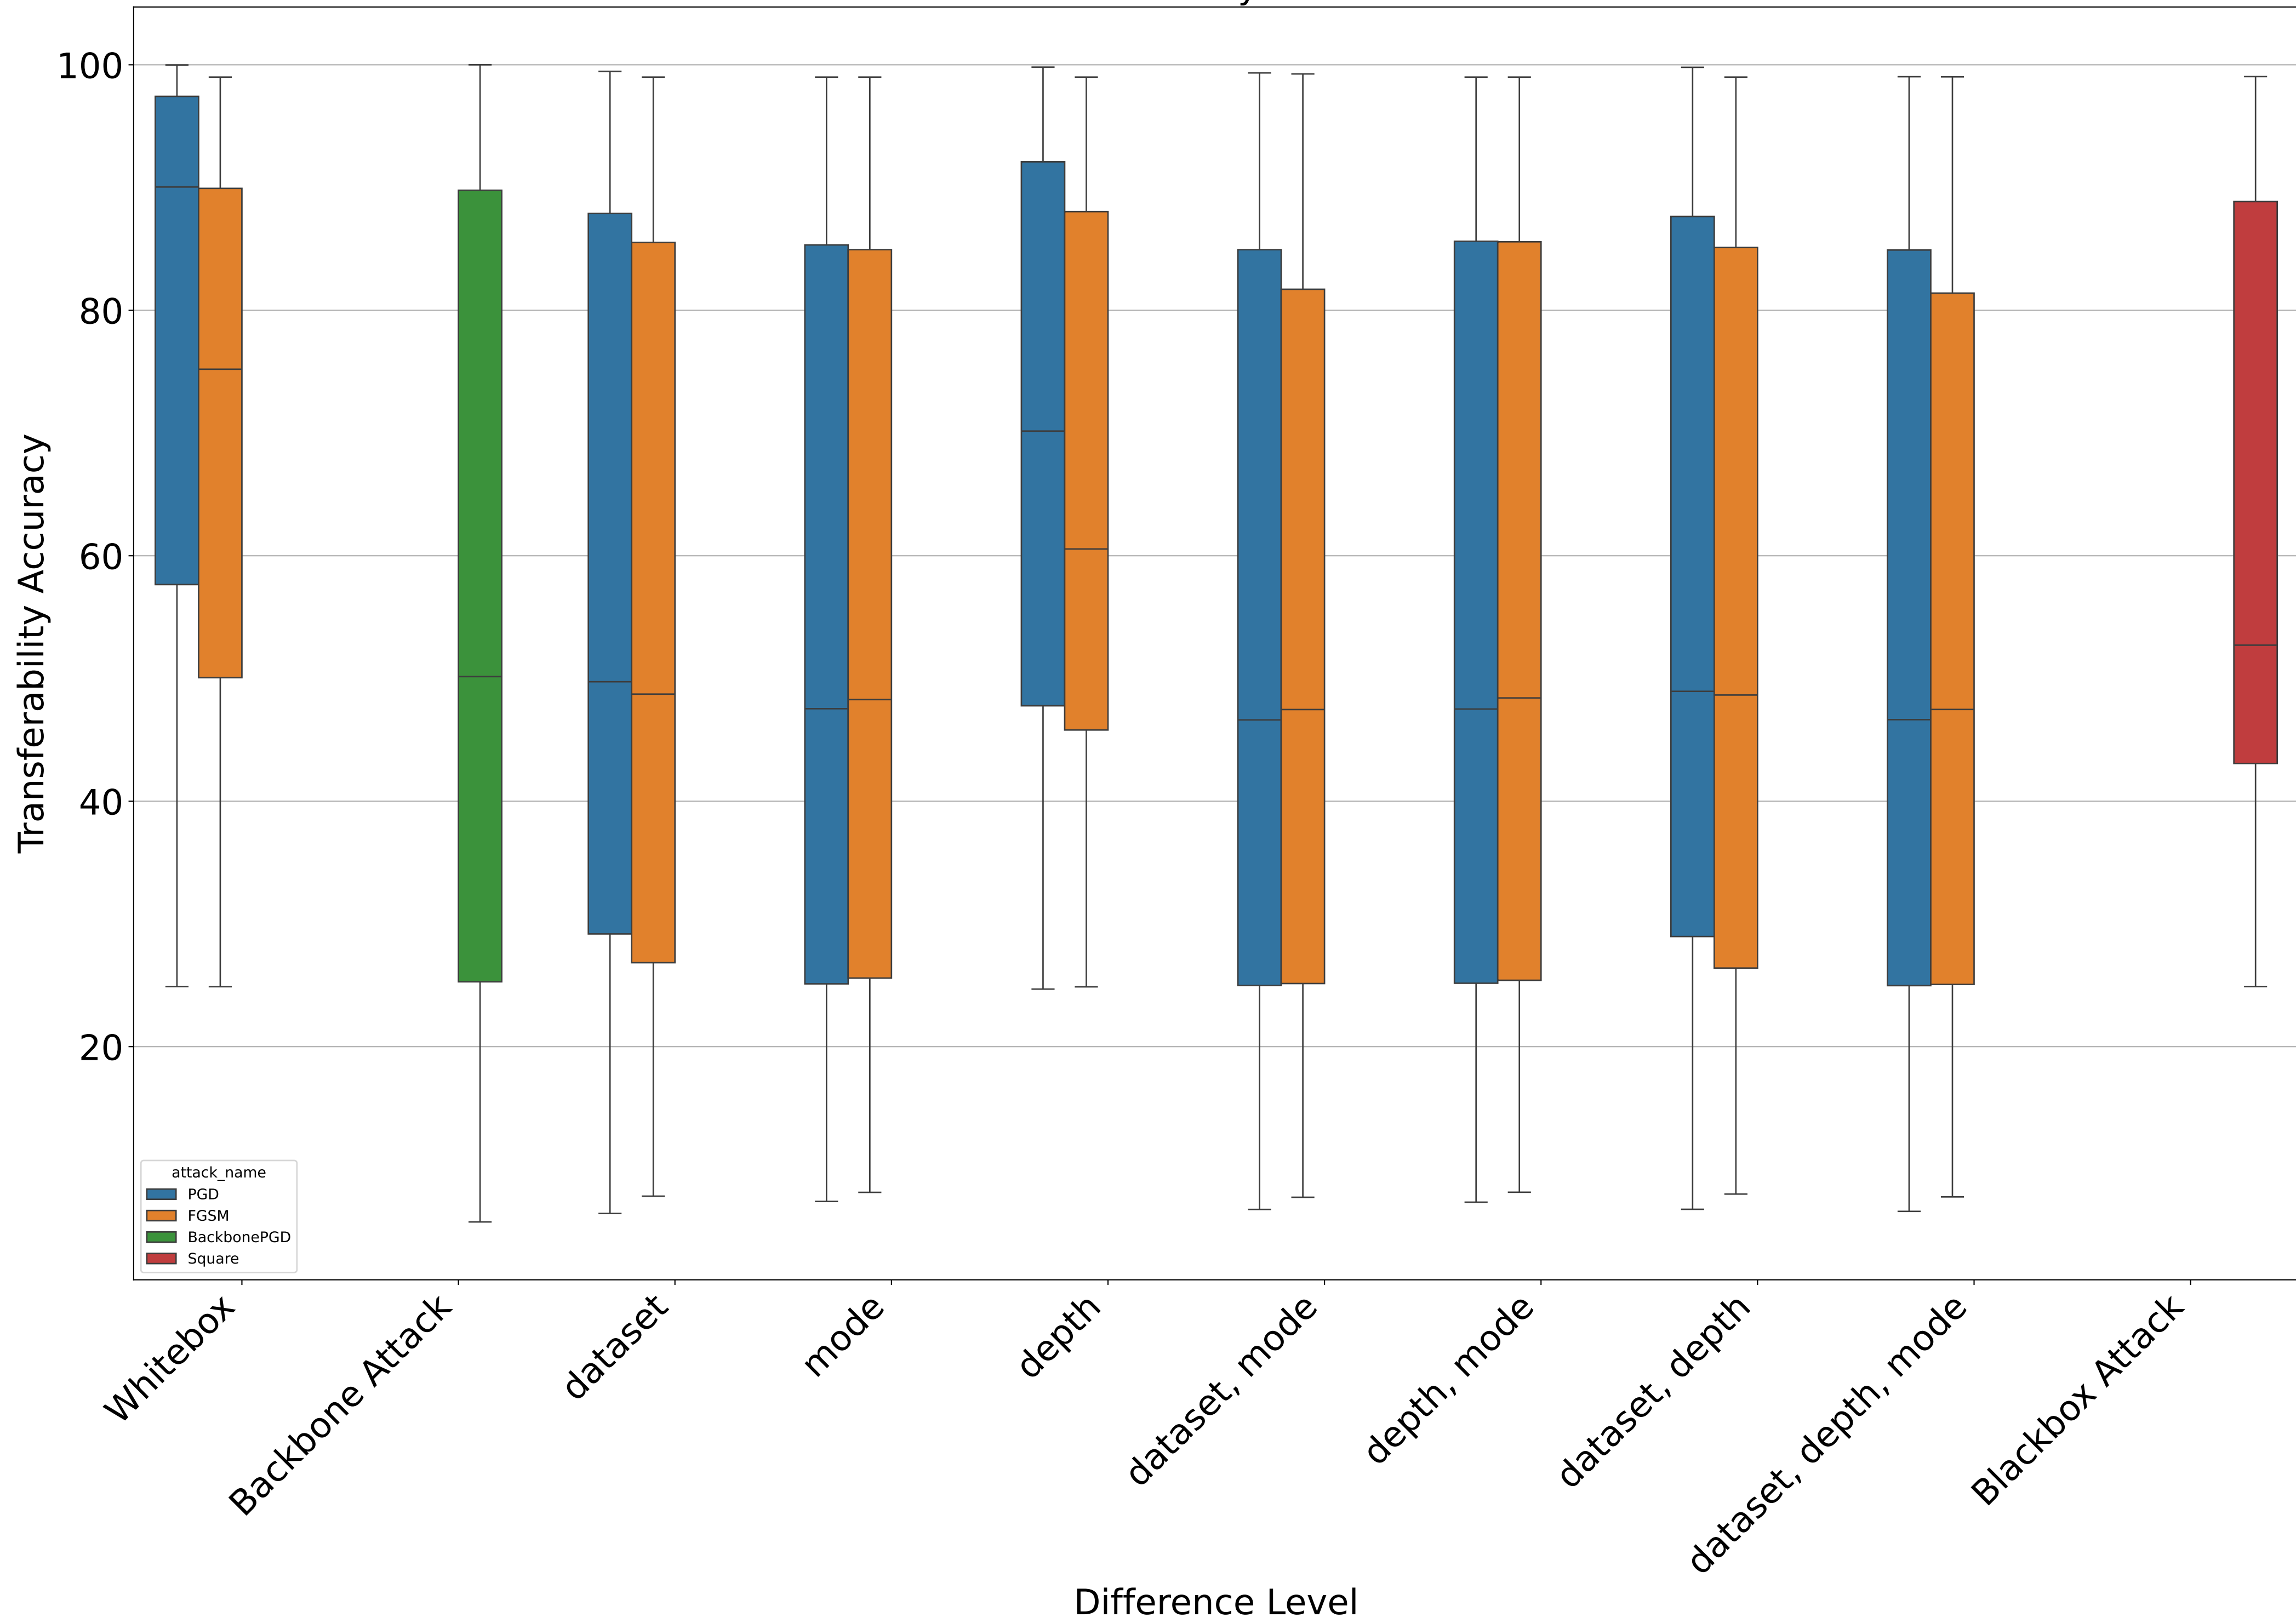

Supplement: supplementary_material [file transferability_attack_type_not_longerPGD.pdf › adversarial_for_icml/figures/not_longer_pgd/transferability_attack_type_not_longerPGD.pdf]

Adversarial Transferability For Different Datasets

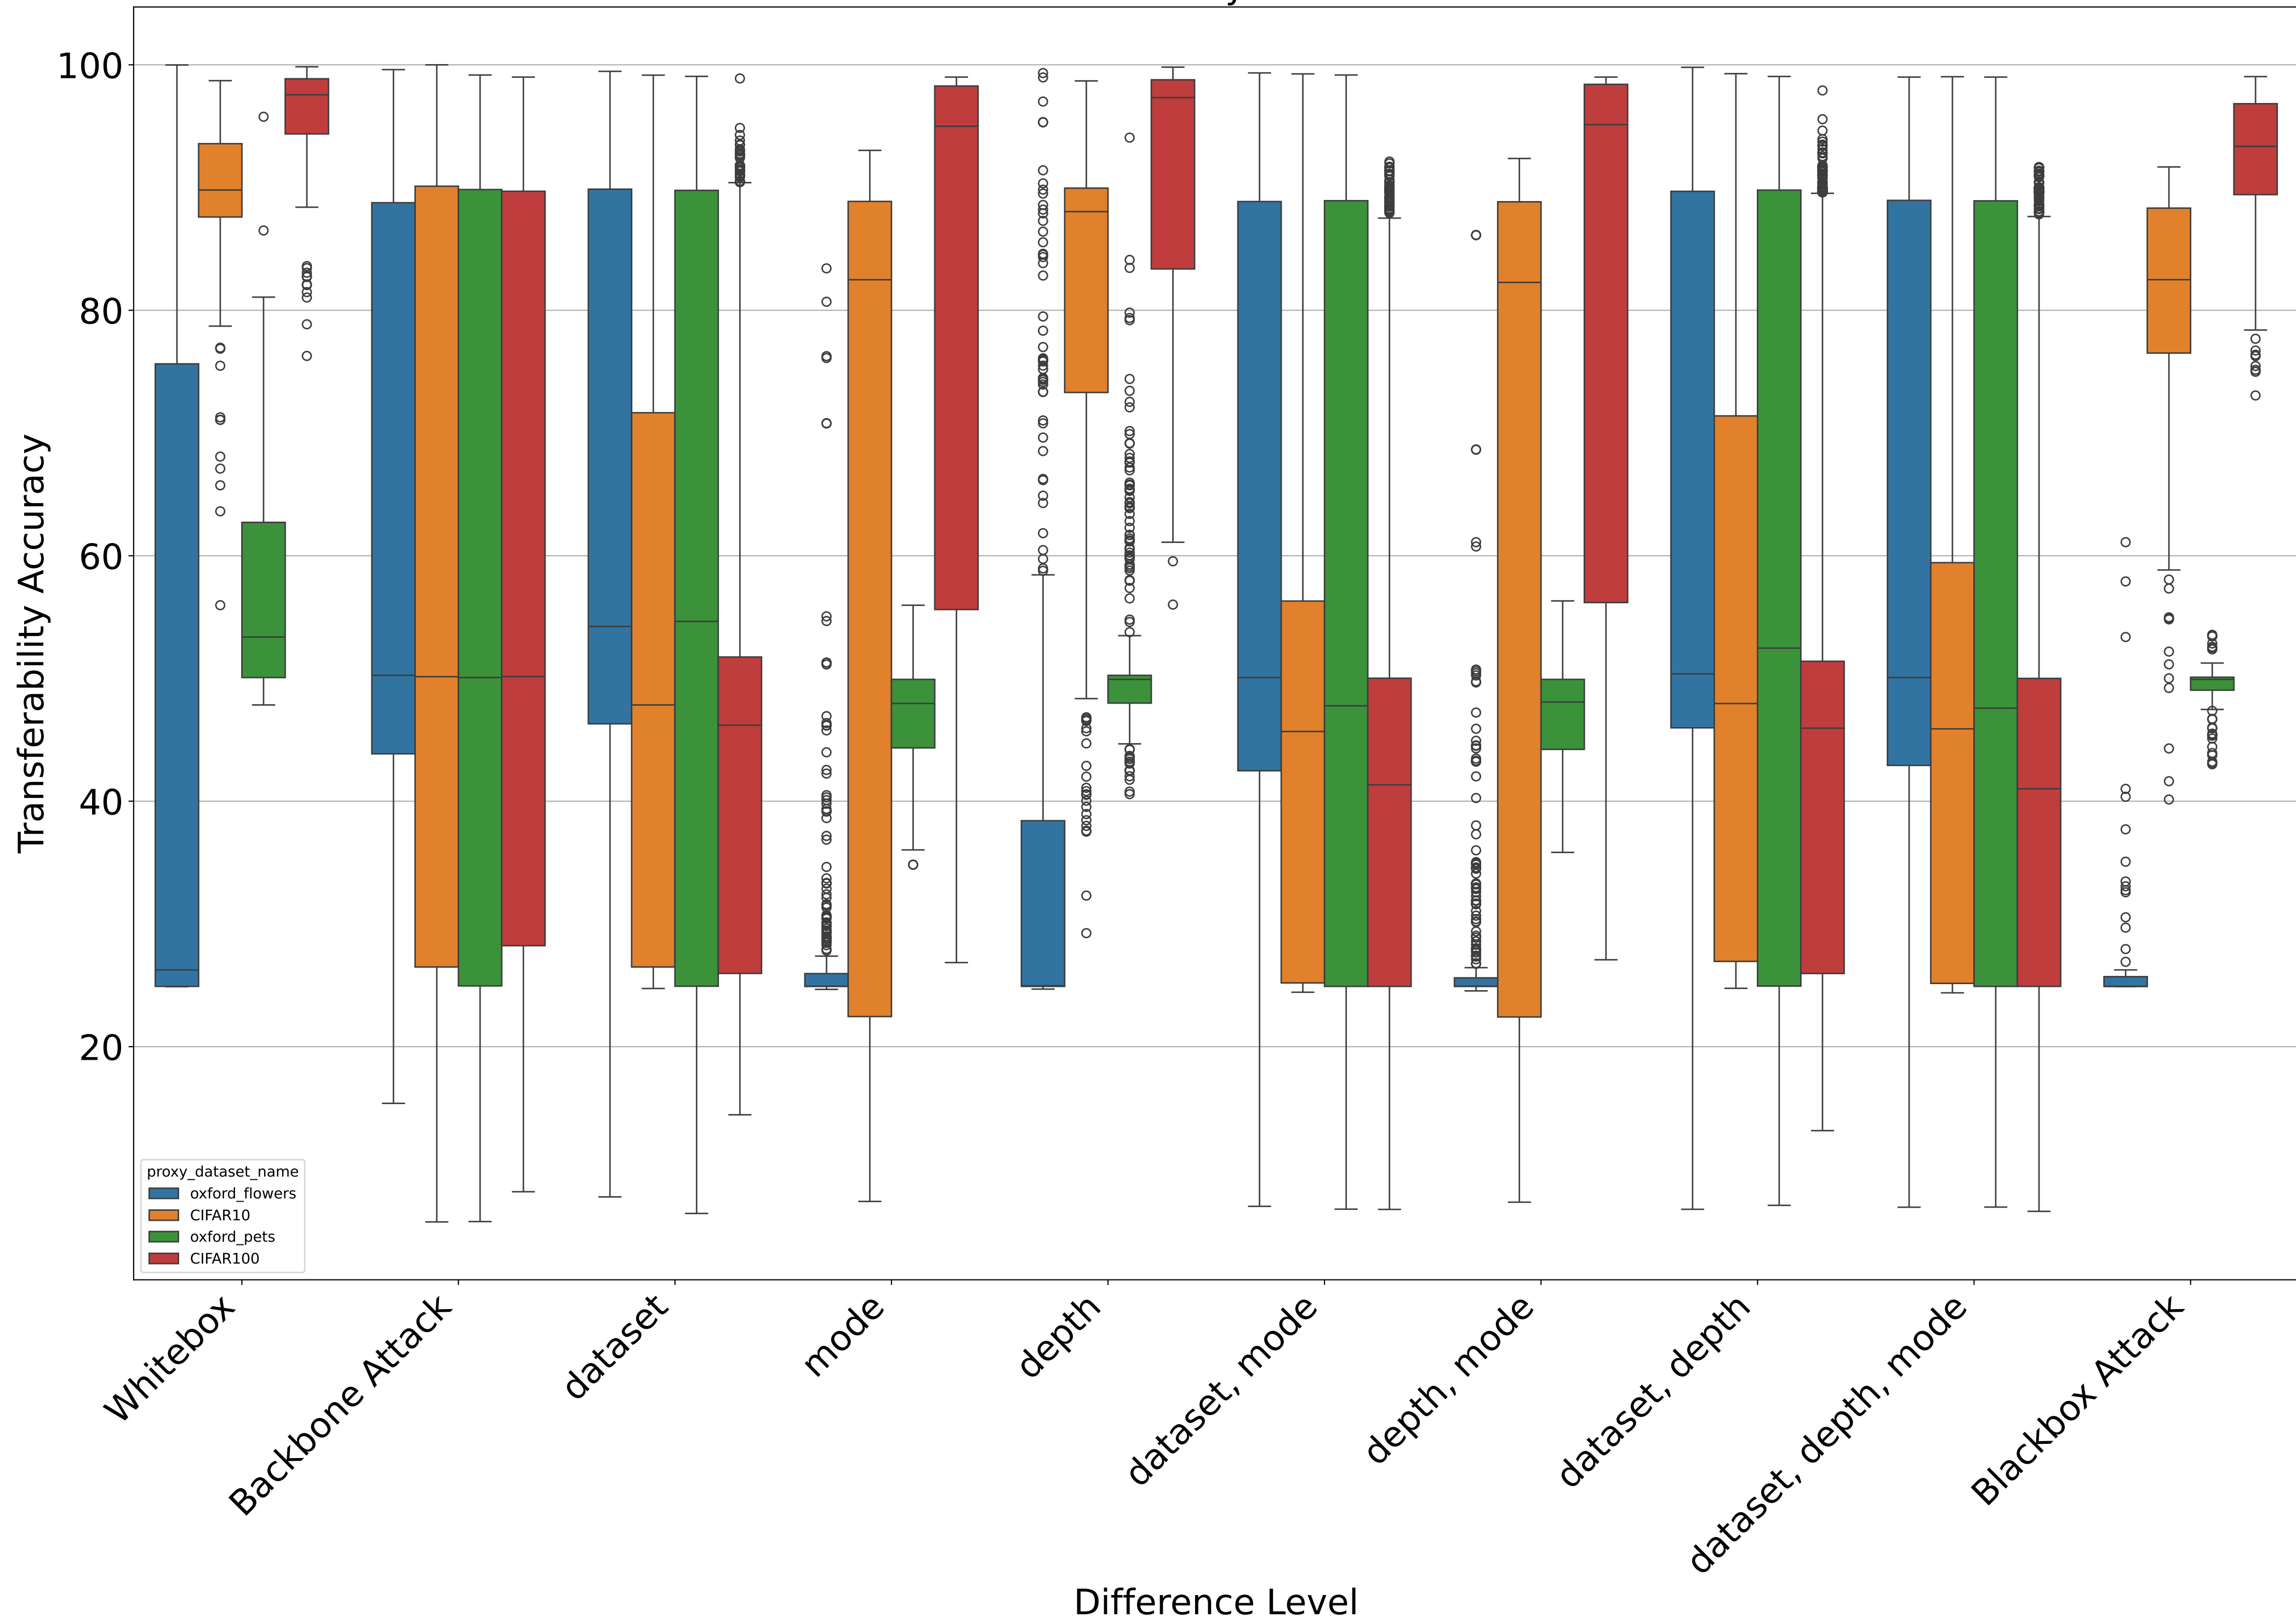

Supplement: supplementary_material [file transferability_datasets_not_longerPGD.pdf › adversarial_for_icml/figures/not_longer_pgd/transferability_datasets_not_longerPGD.pdf]

Adversarial Transferability For Different Fine-Tuning Techniques

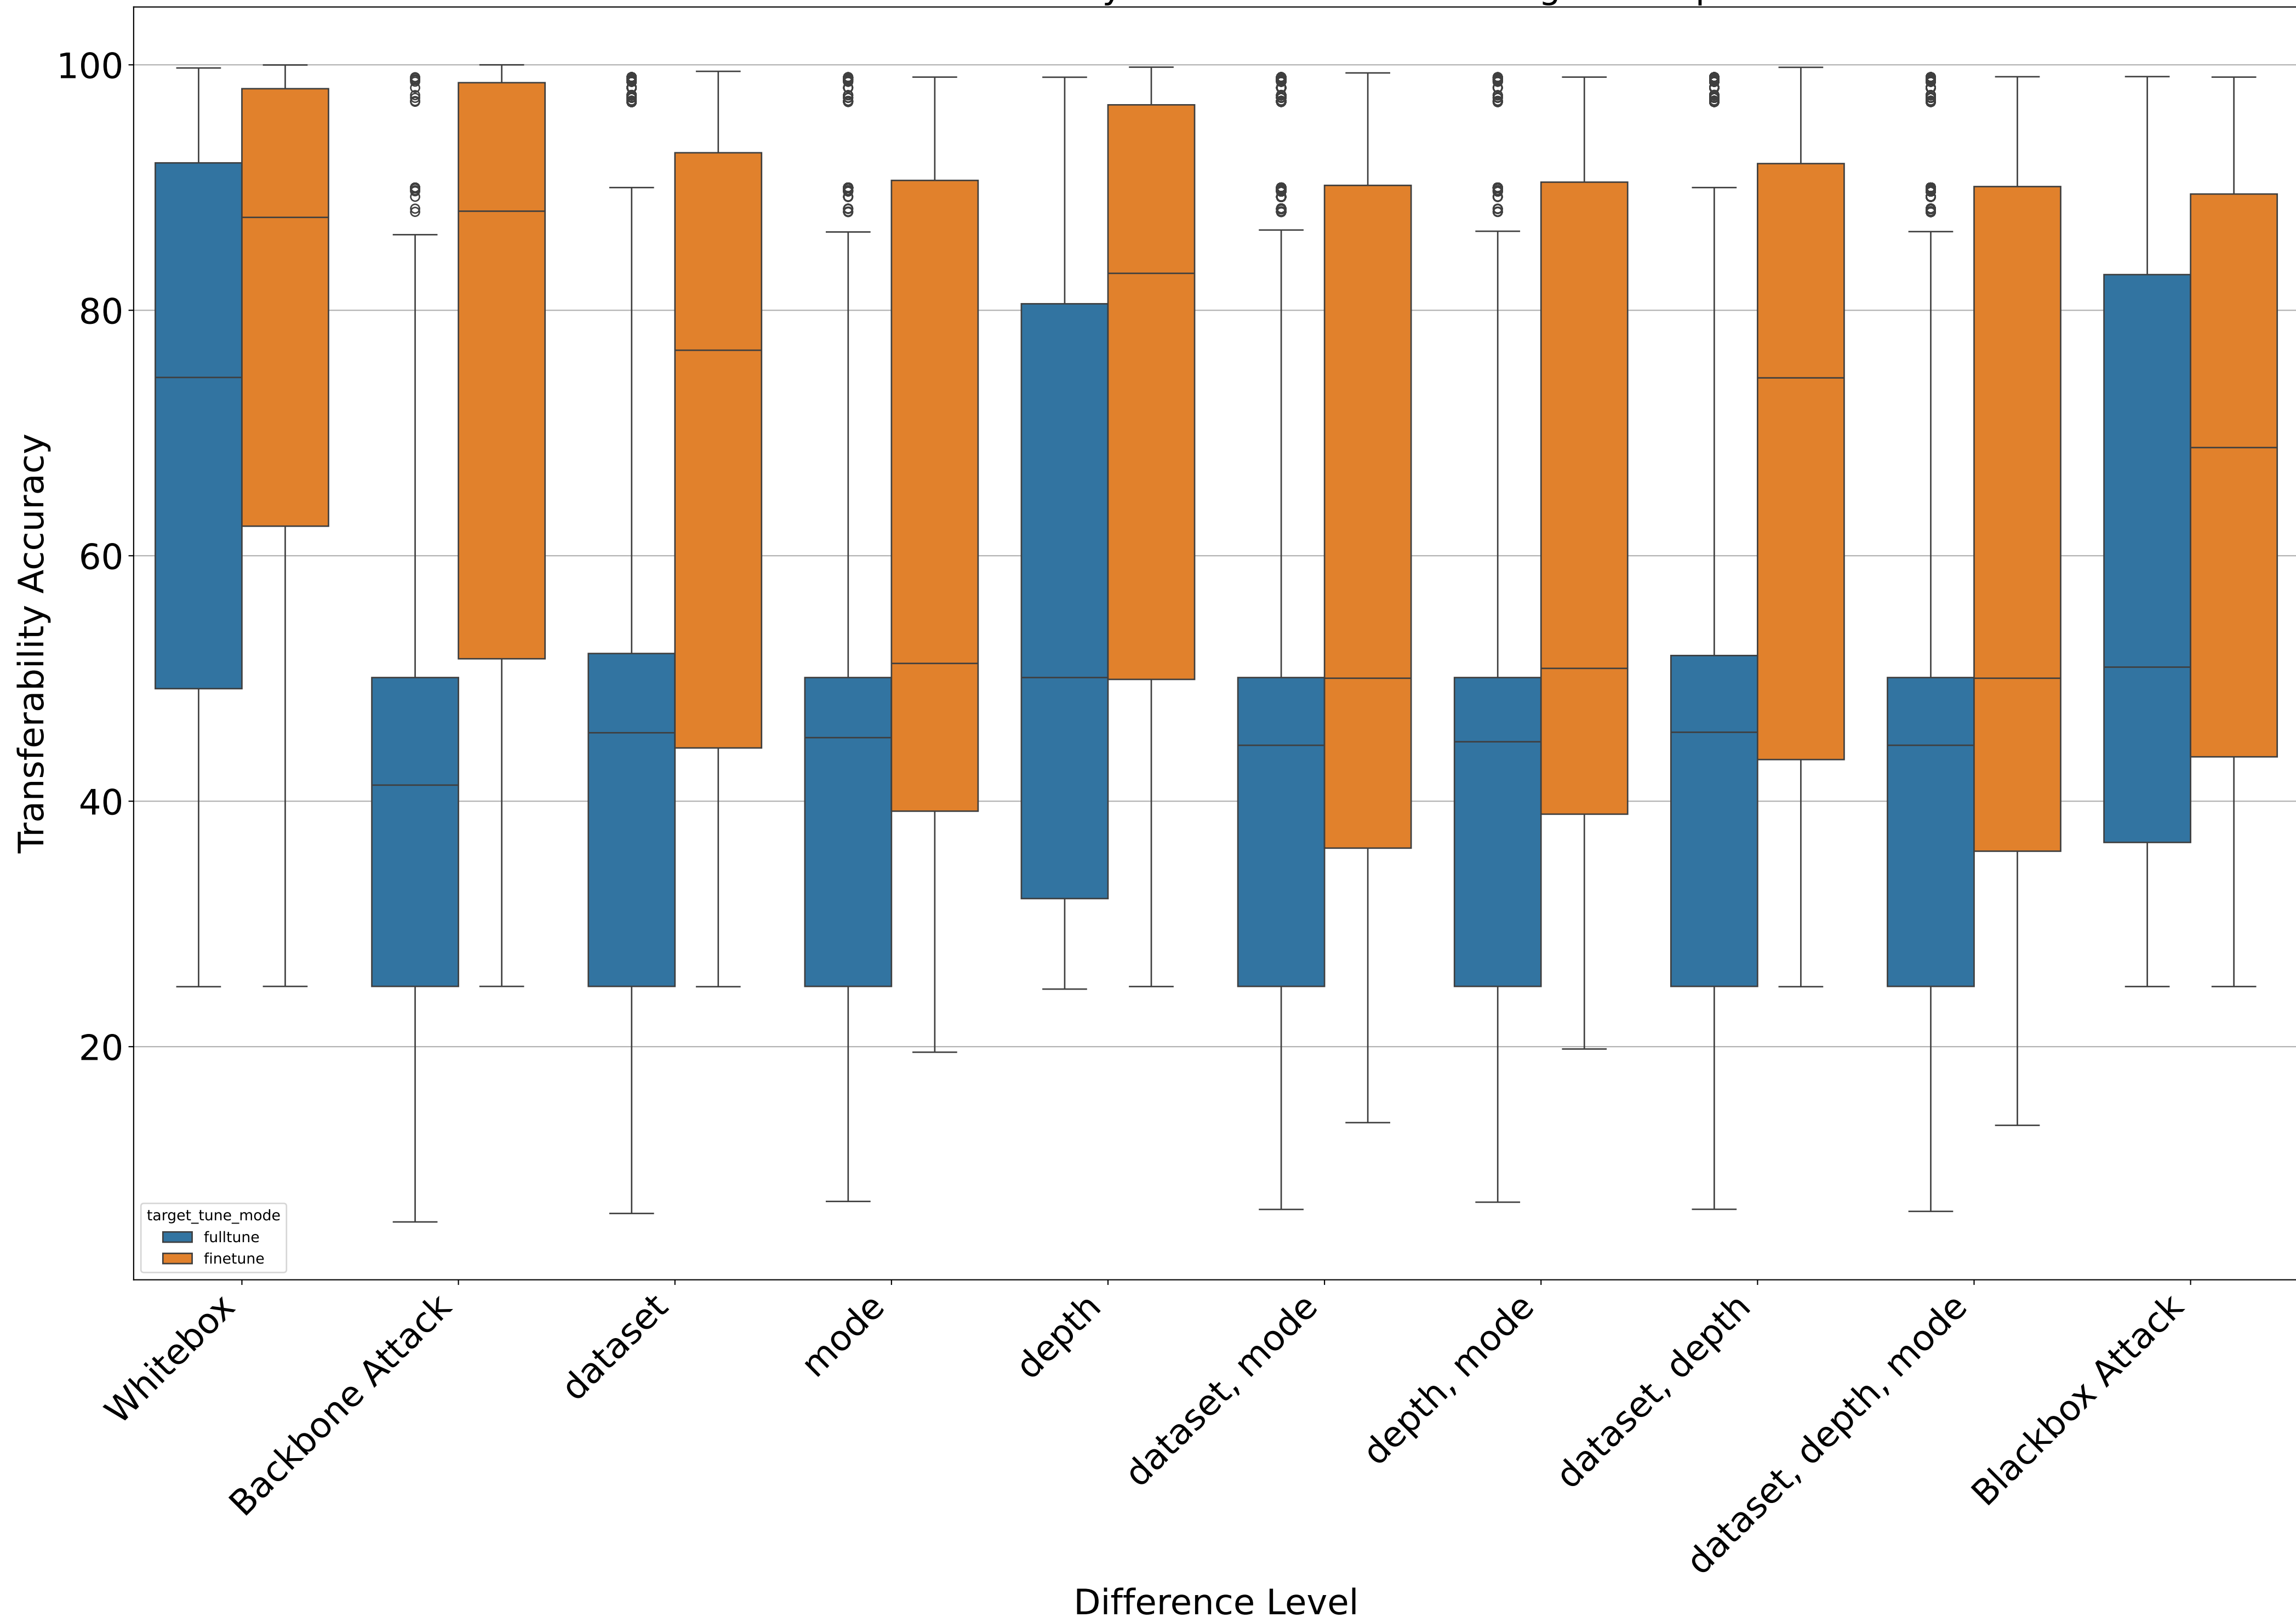

Supplement: supplementary_material [file transferability_finetuning_techniques_not_longerPGD.pdf › adversarial_for_icml/figures/not_longer_pgd/transferability_finetuning_techniques_not_longerPGD.pdf]

Adversarial Transferability For Different Fine-Tuning Types

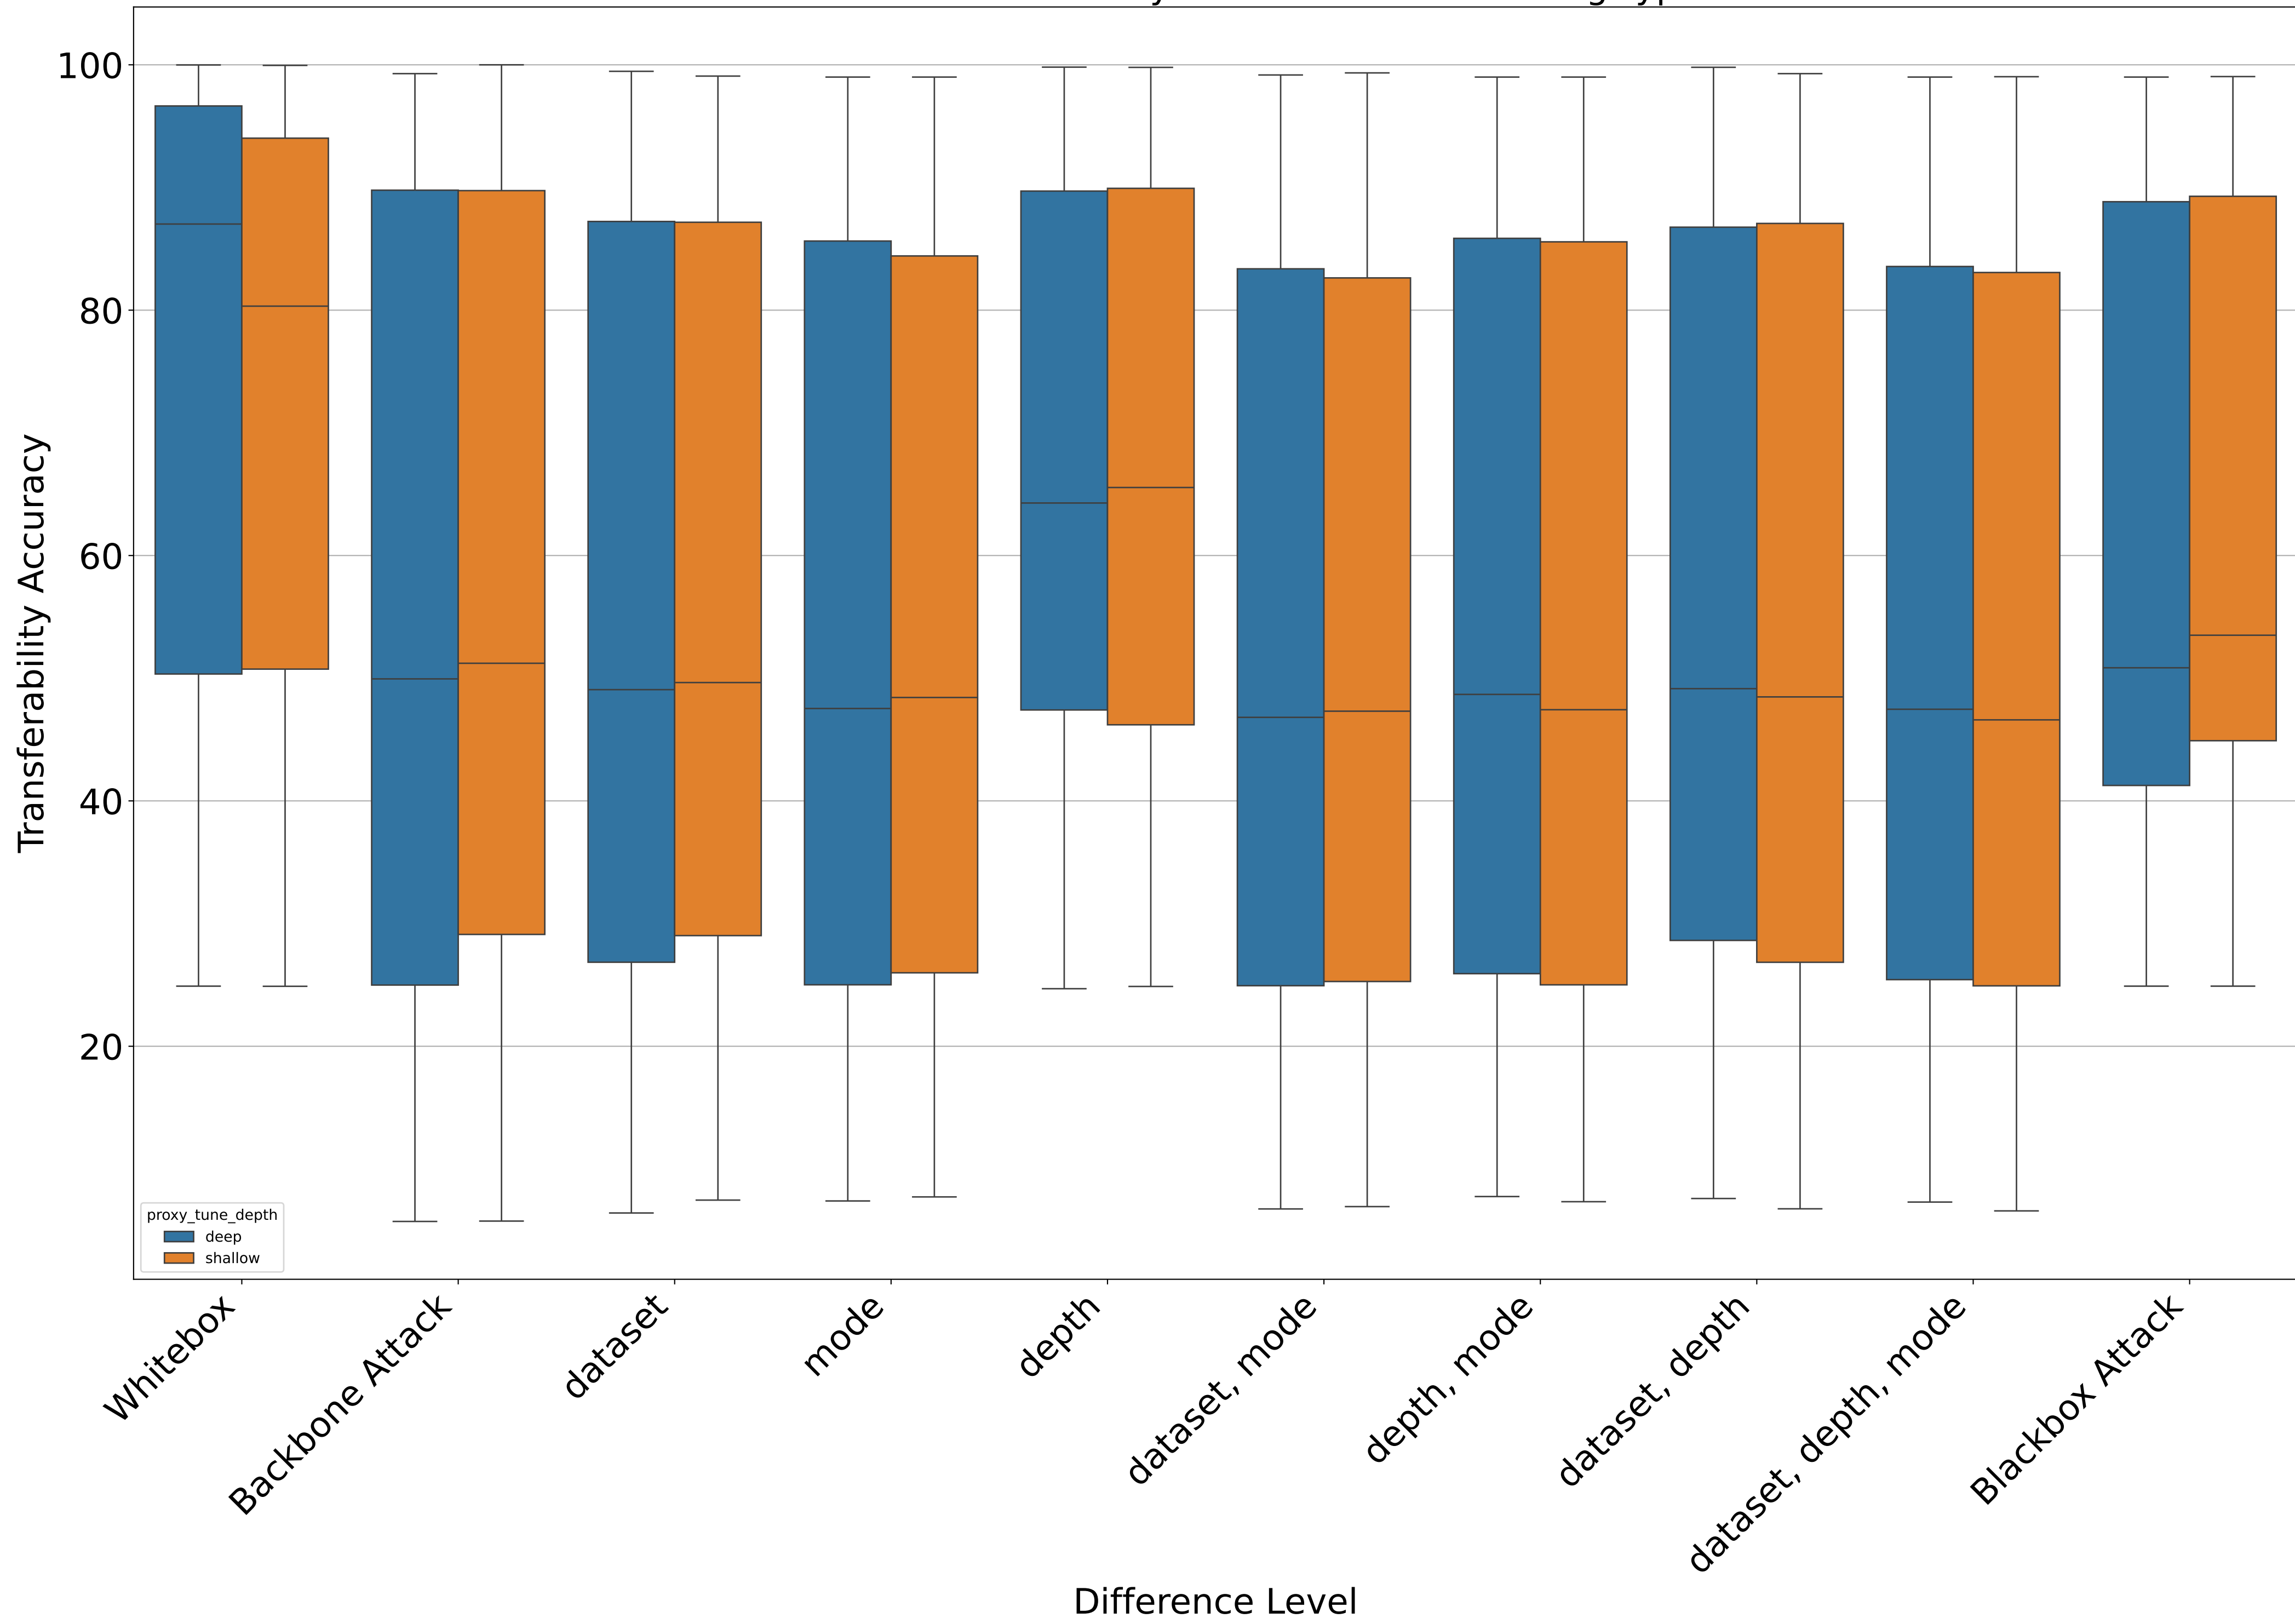

Supplement: supplementary_material [file transferability_finetuning_types_not_longerPGD.pdf › adversarial_for_icml/figures/not_longer_pgd/transferability_finetuning_types_not_longerPGD.pdf]

Adversarial Transferability For Targeted vs non-Targeted Attacks

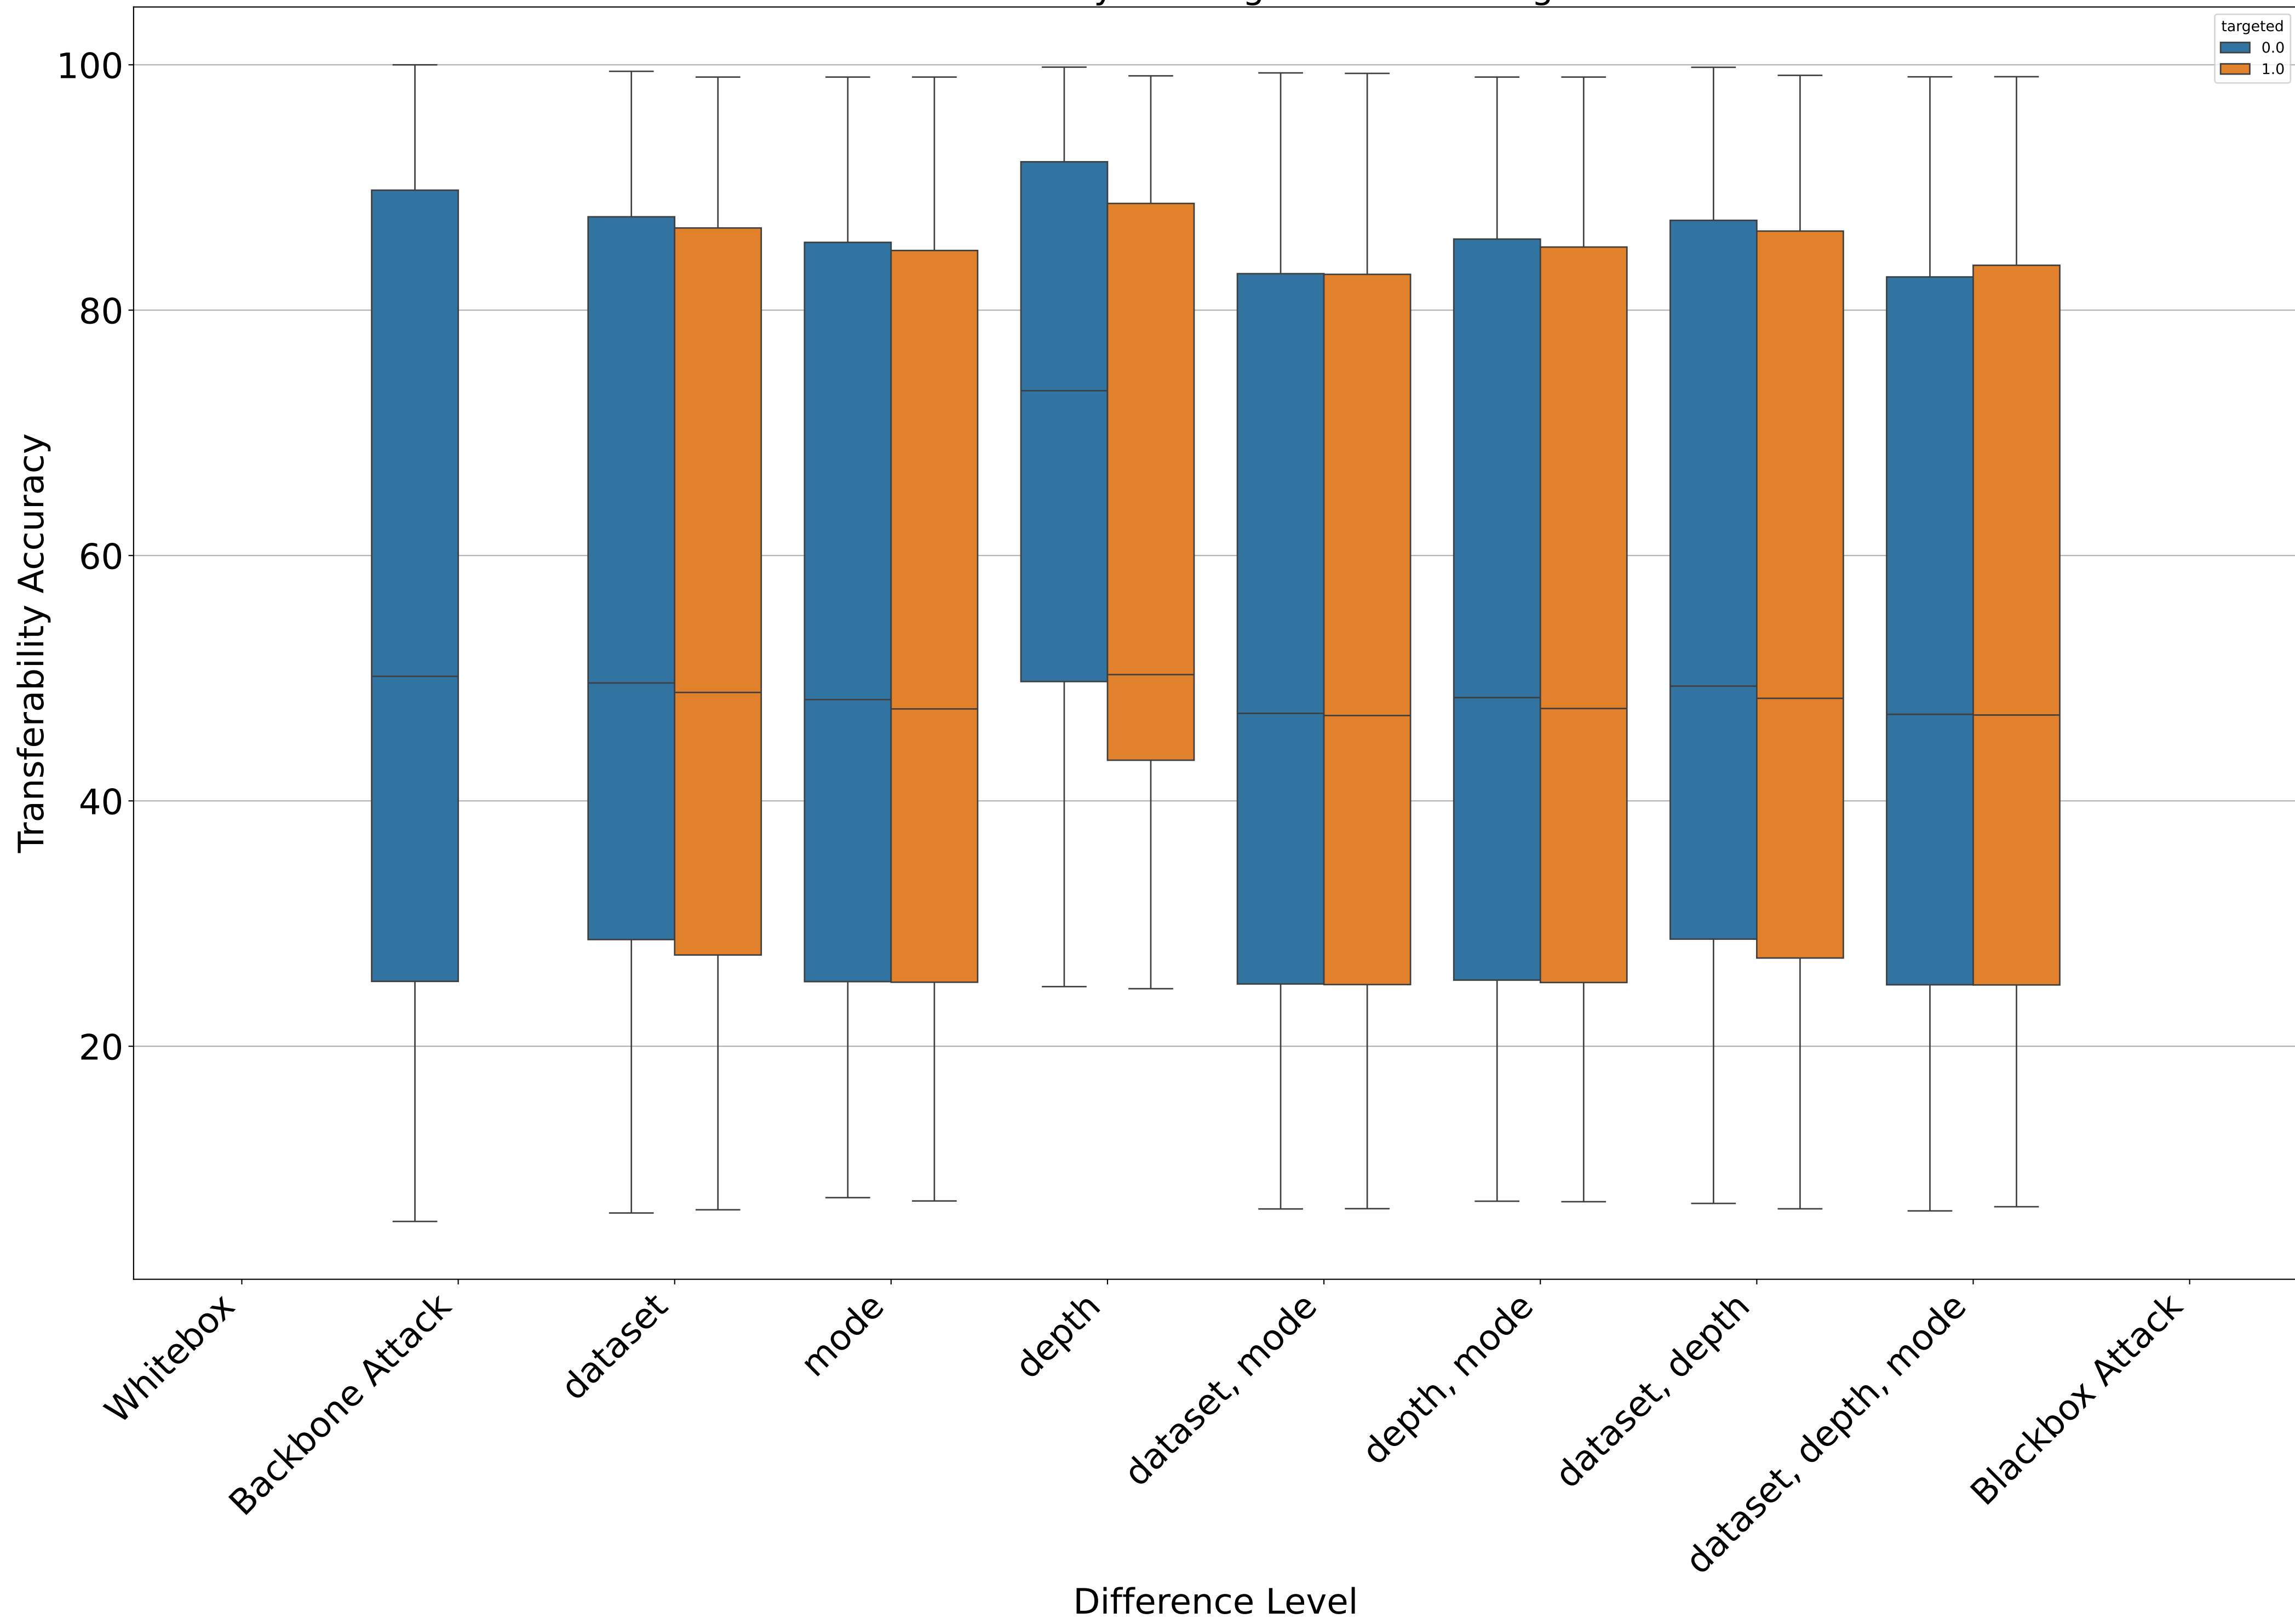

Supplement: supplementary_material [file transferability_targeted_untargeted_not_longerPGD.pdf › adversarial_for_icml/figures/not_longer_pgd/transferability_targeted_untargeted_not_longerPGD.pdf]

Adversarial Transferability For Different Attacks

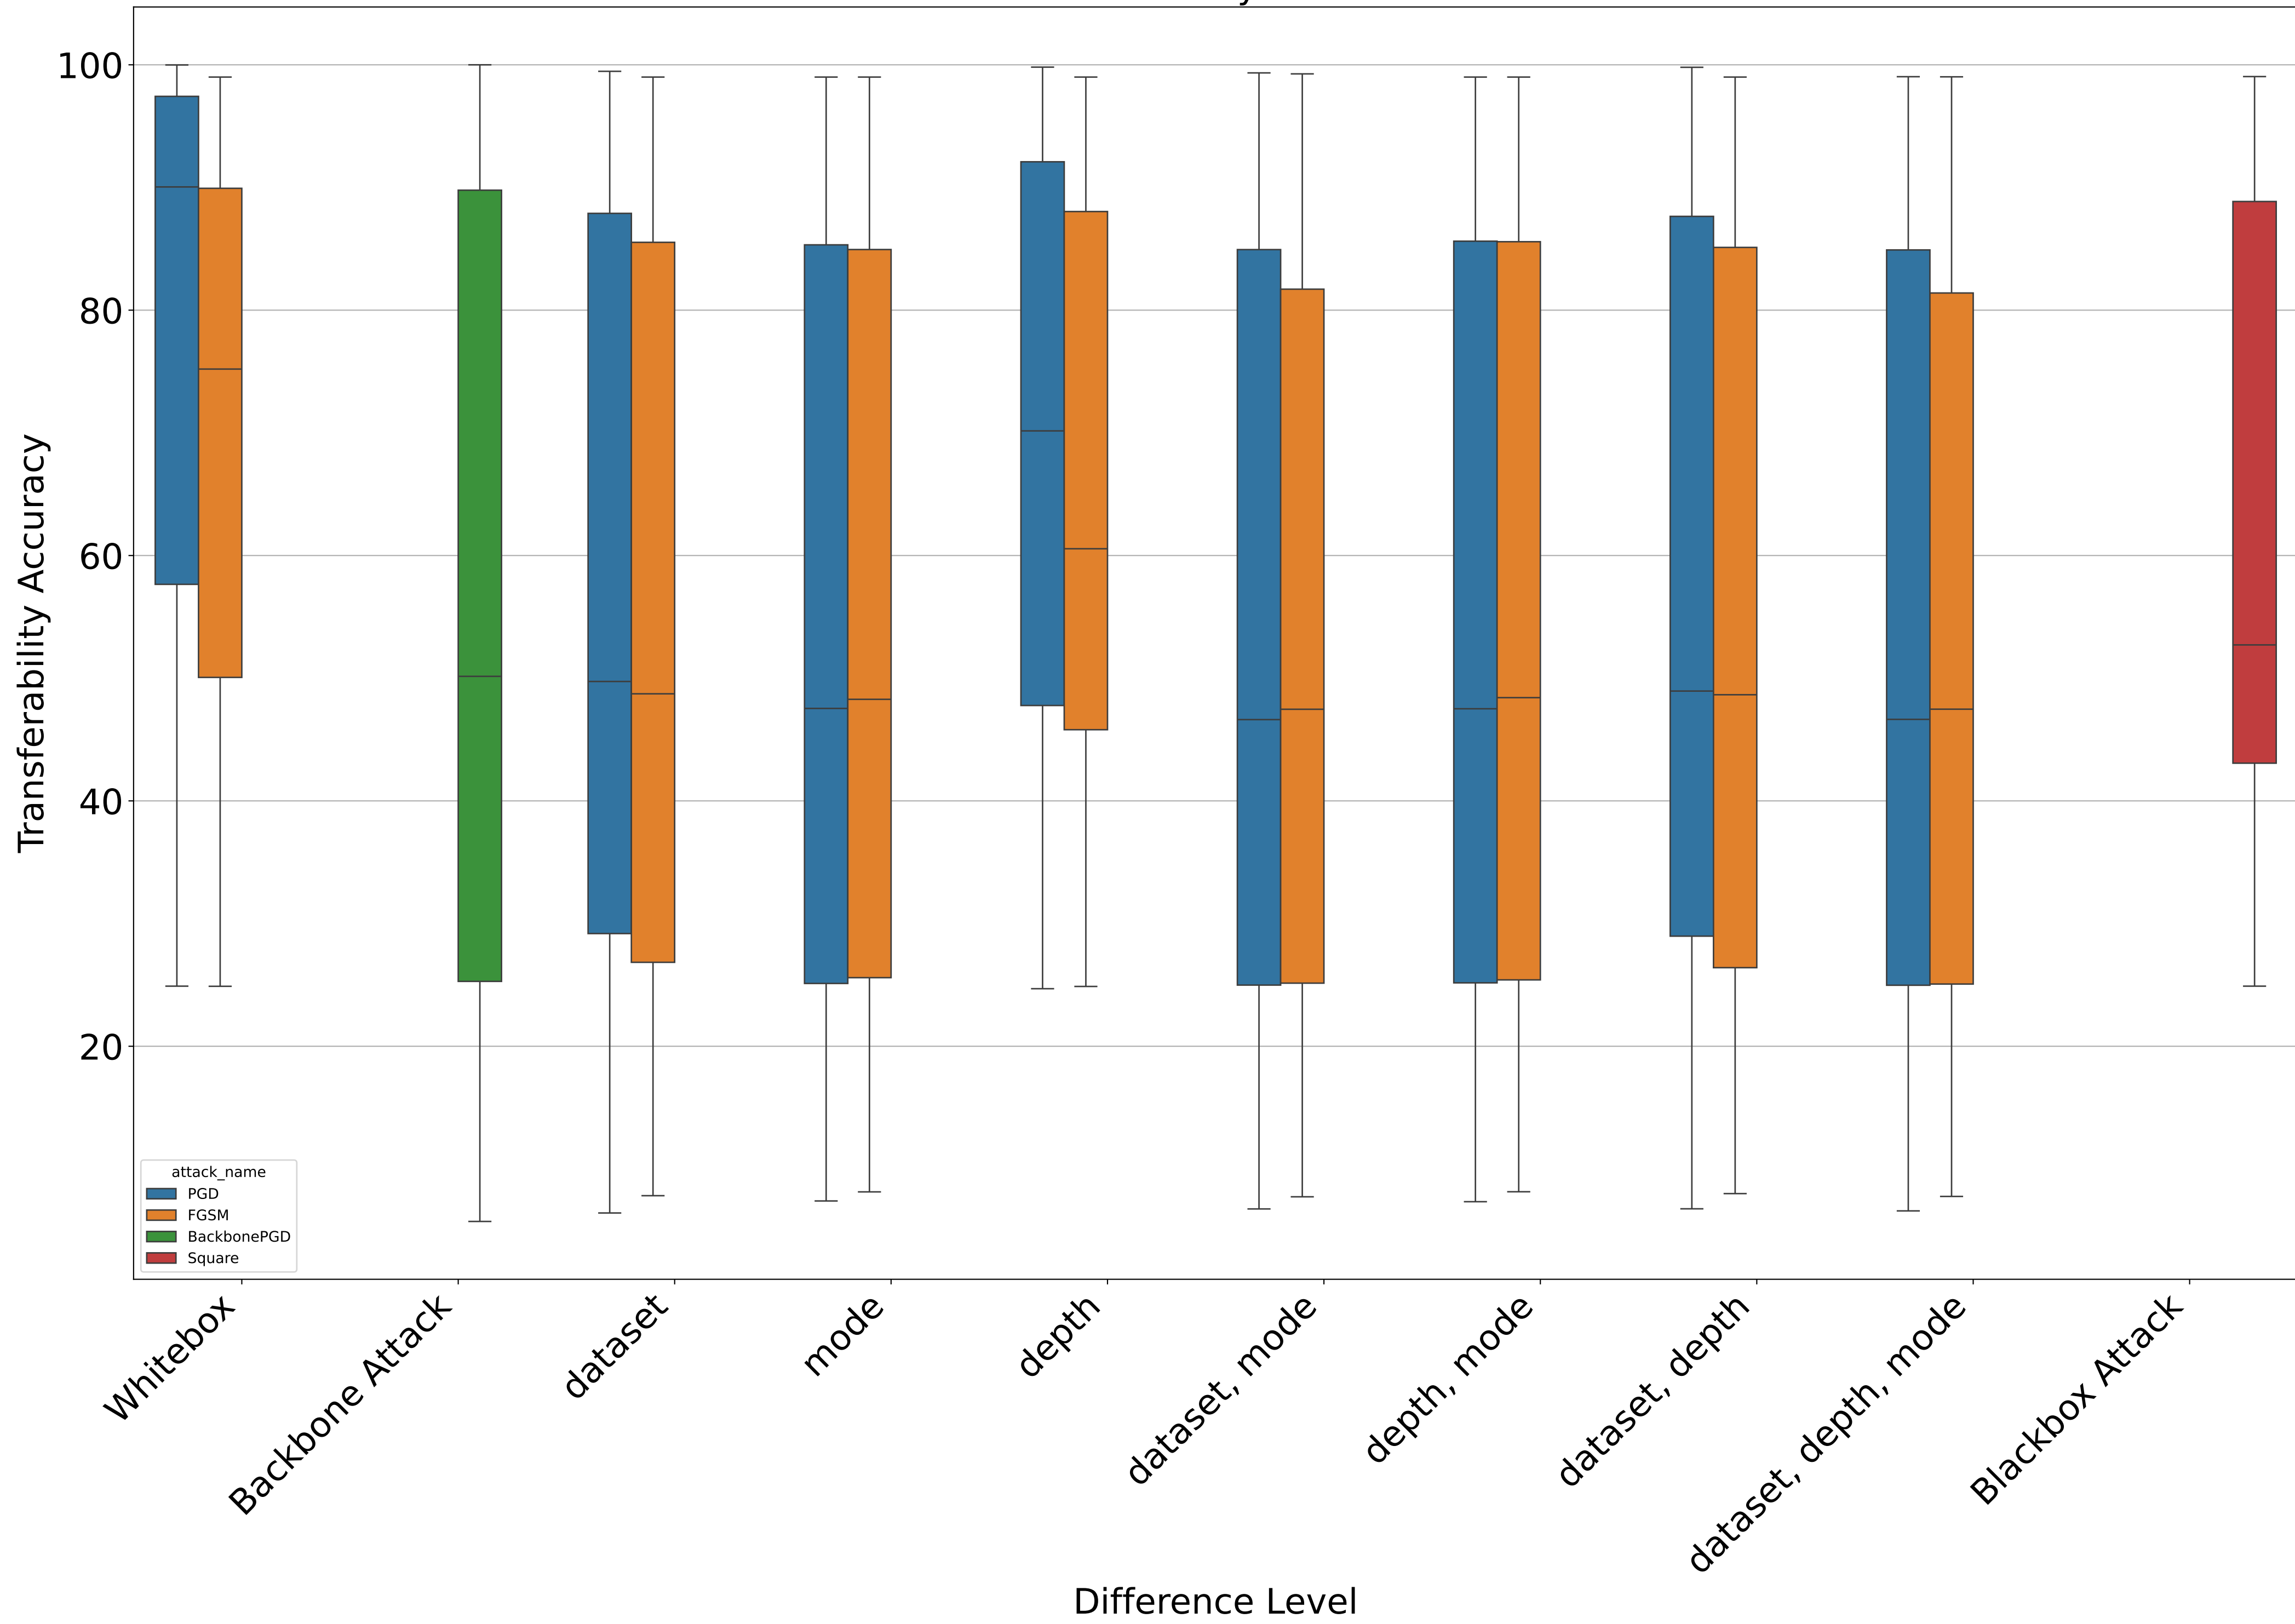

Supplement: supplementary_material [file transferability_attack_type_not_longerPGD.pdf › adversarial_for_icml/figures/old/transferability_attack_type_not_longerPGD.pdf]

# Adversarial Transferability For Different Attacks

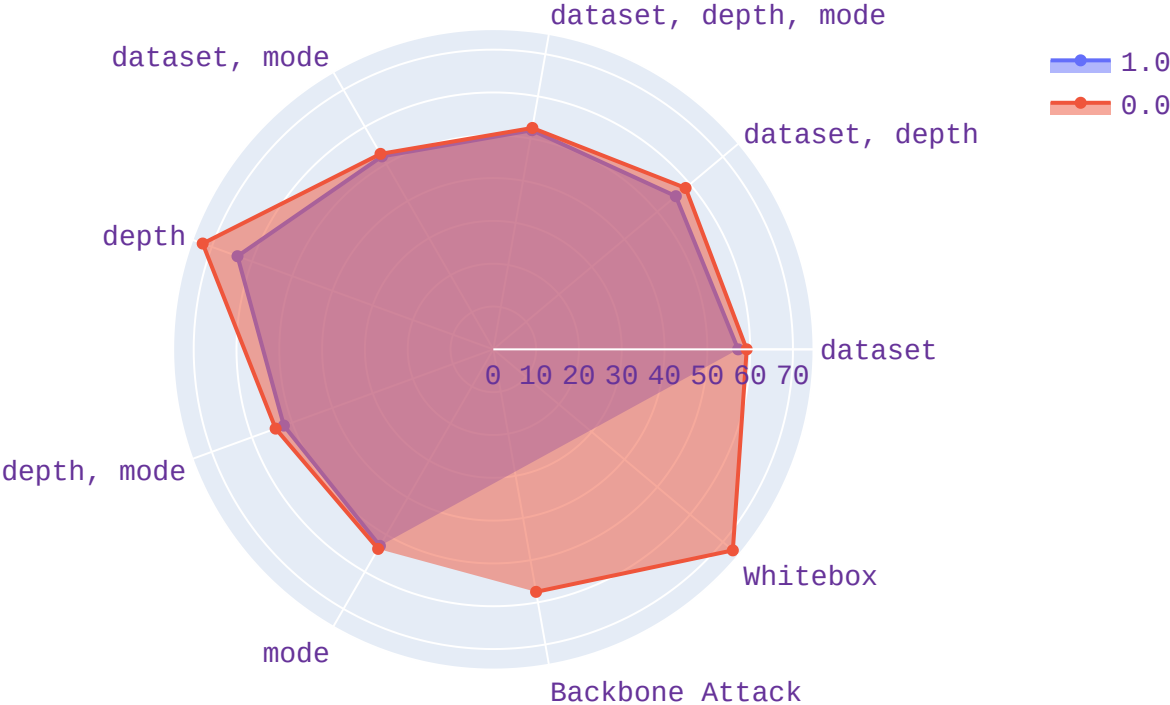

Supplement: supplementary_material [file transferability_attack_type_spider_with_longerPGD.pdf › adversarial_for_icml/figures/old/transferability_attack_type_spider_with_longerPGD.pdf]

Adversarial Transferability For Different Attacks

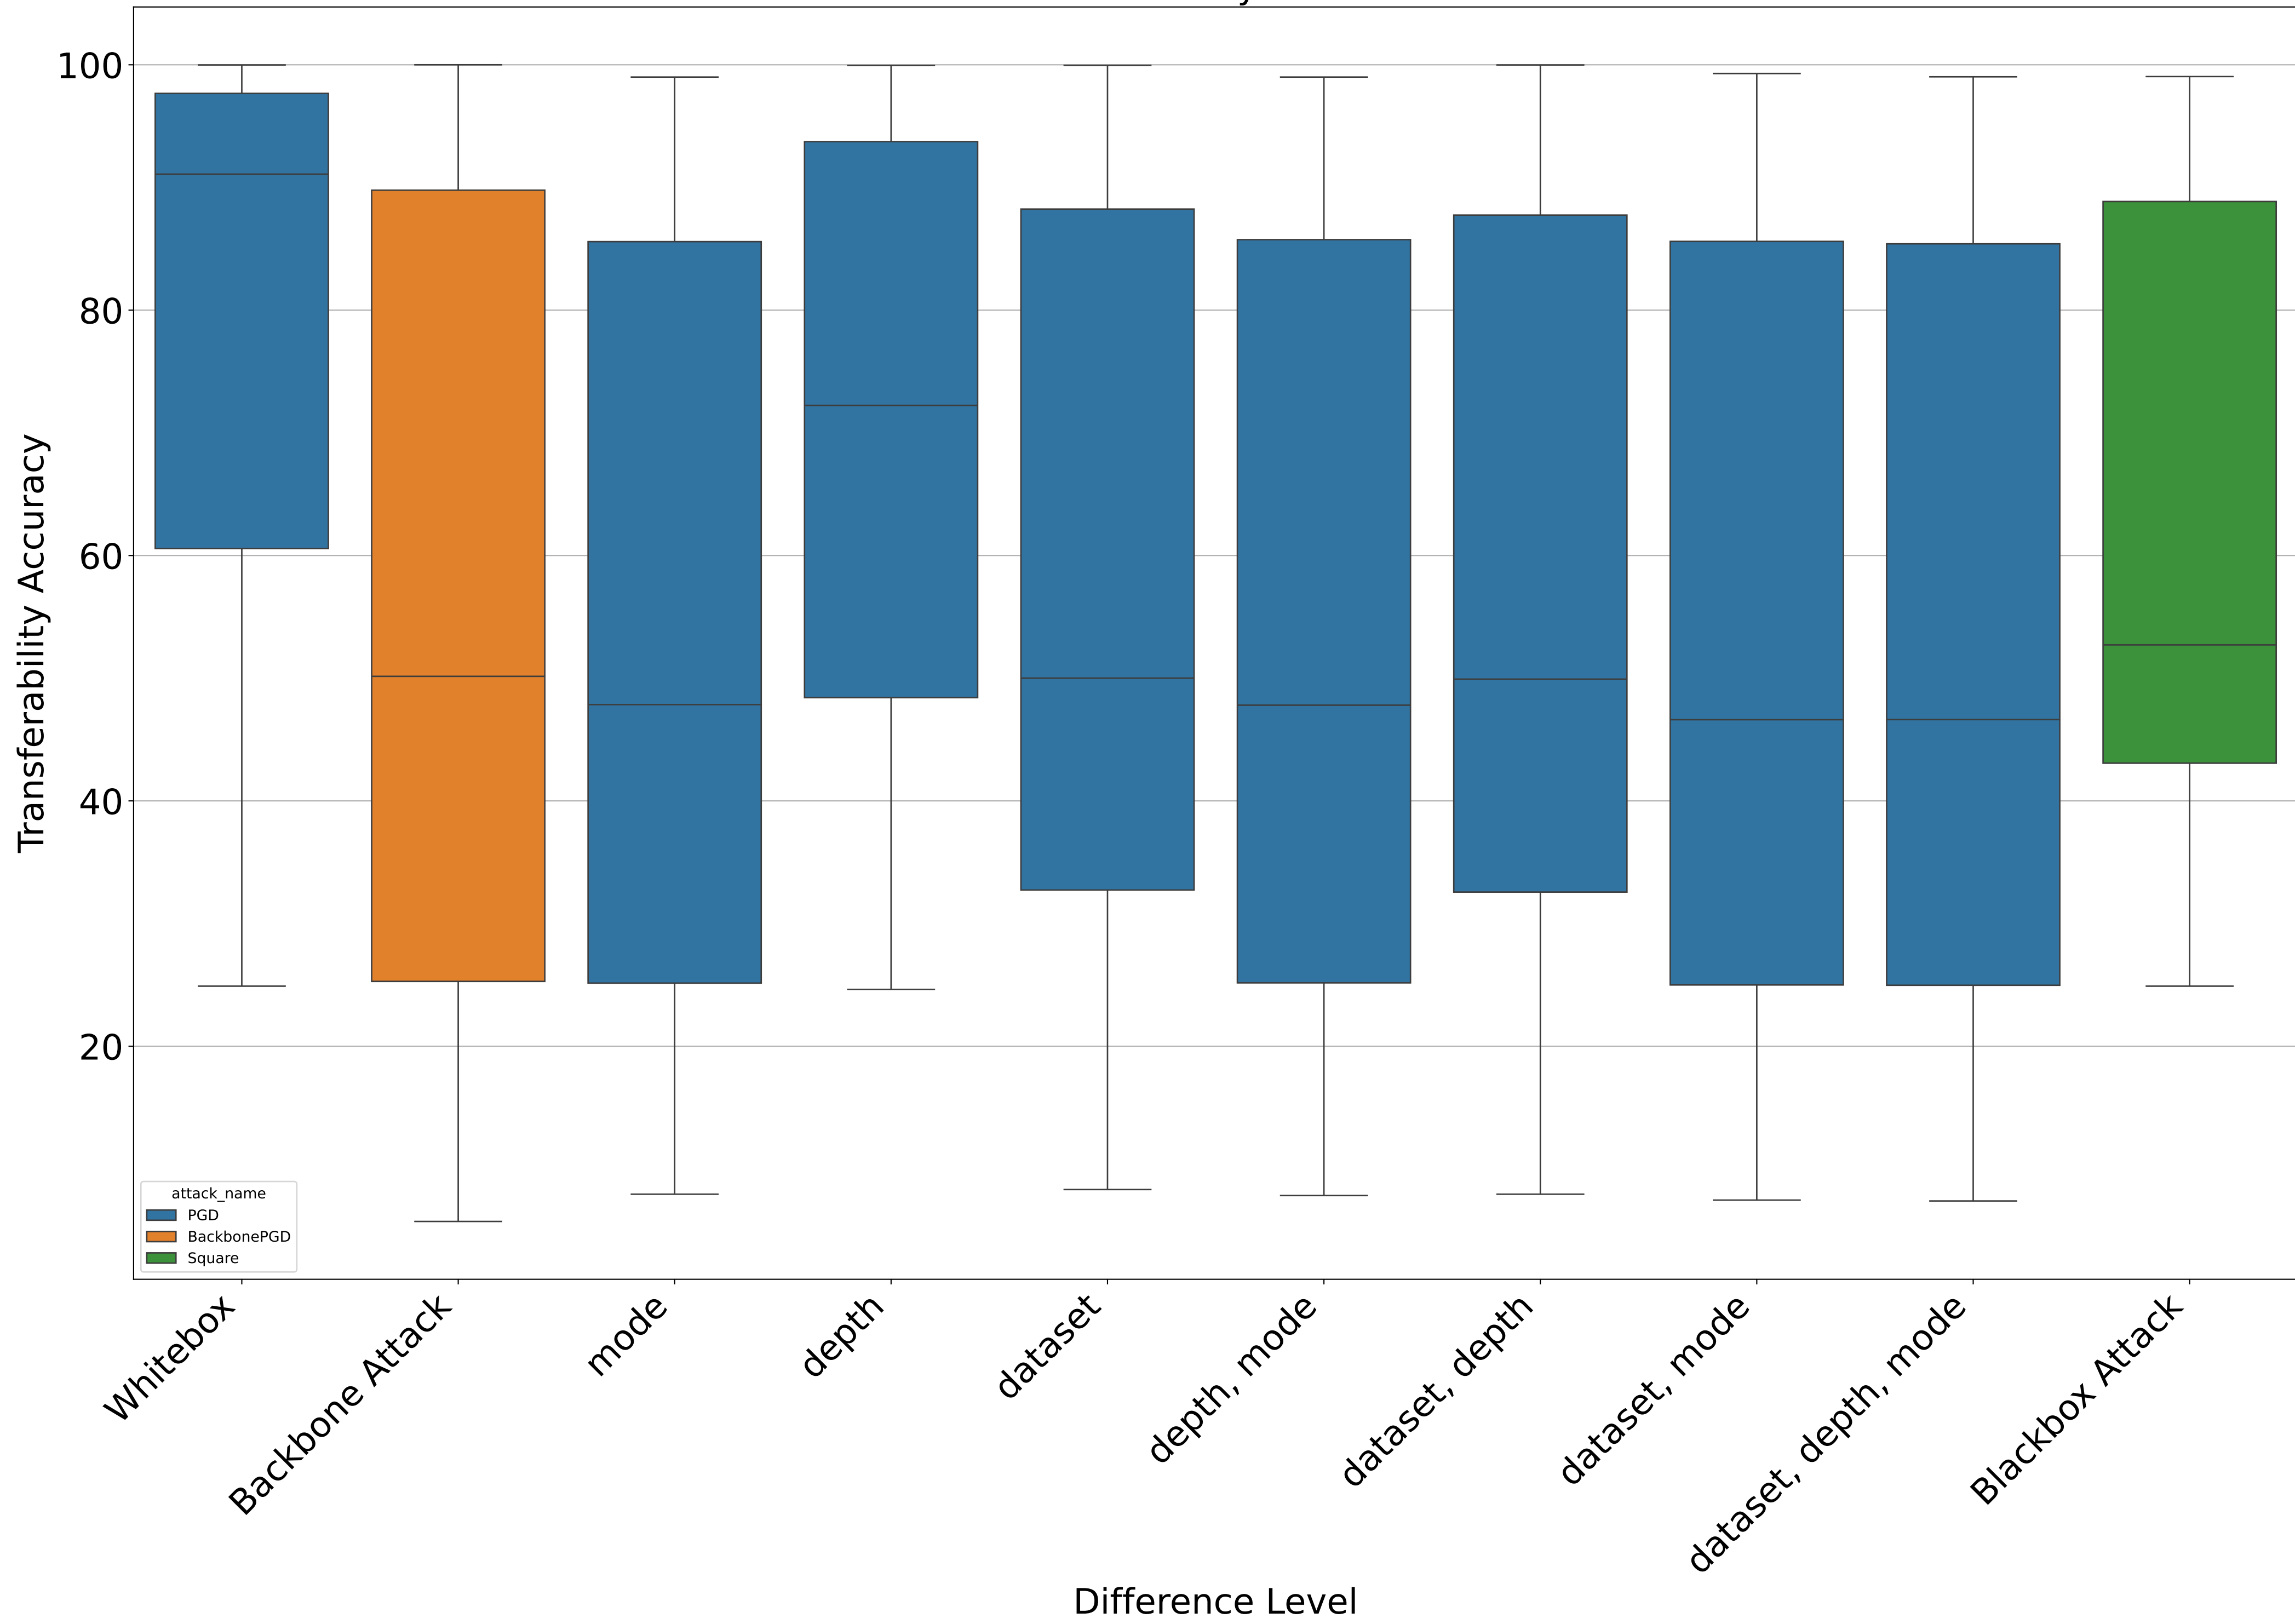

Supplement: supplementary_material [file transferability_attack_type_with_longerPGD.pdf › adversarial_for_icml/figures/old/transferability_attack_type_with_longerPGD.pdf]

Transferability average per dataset

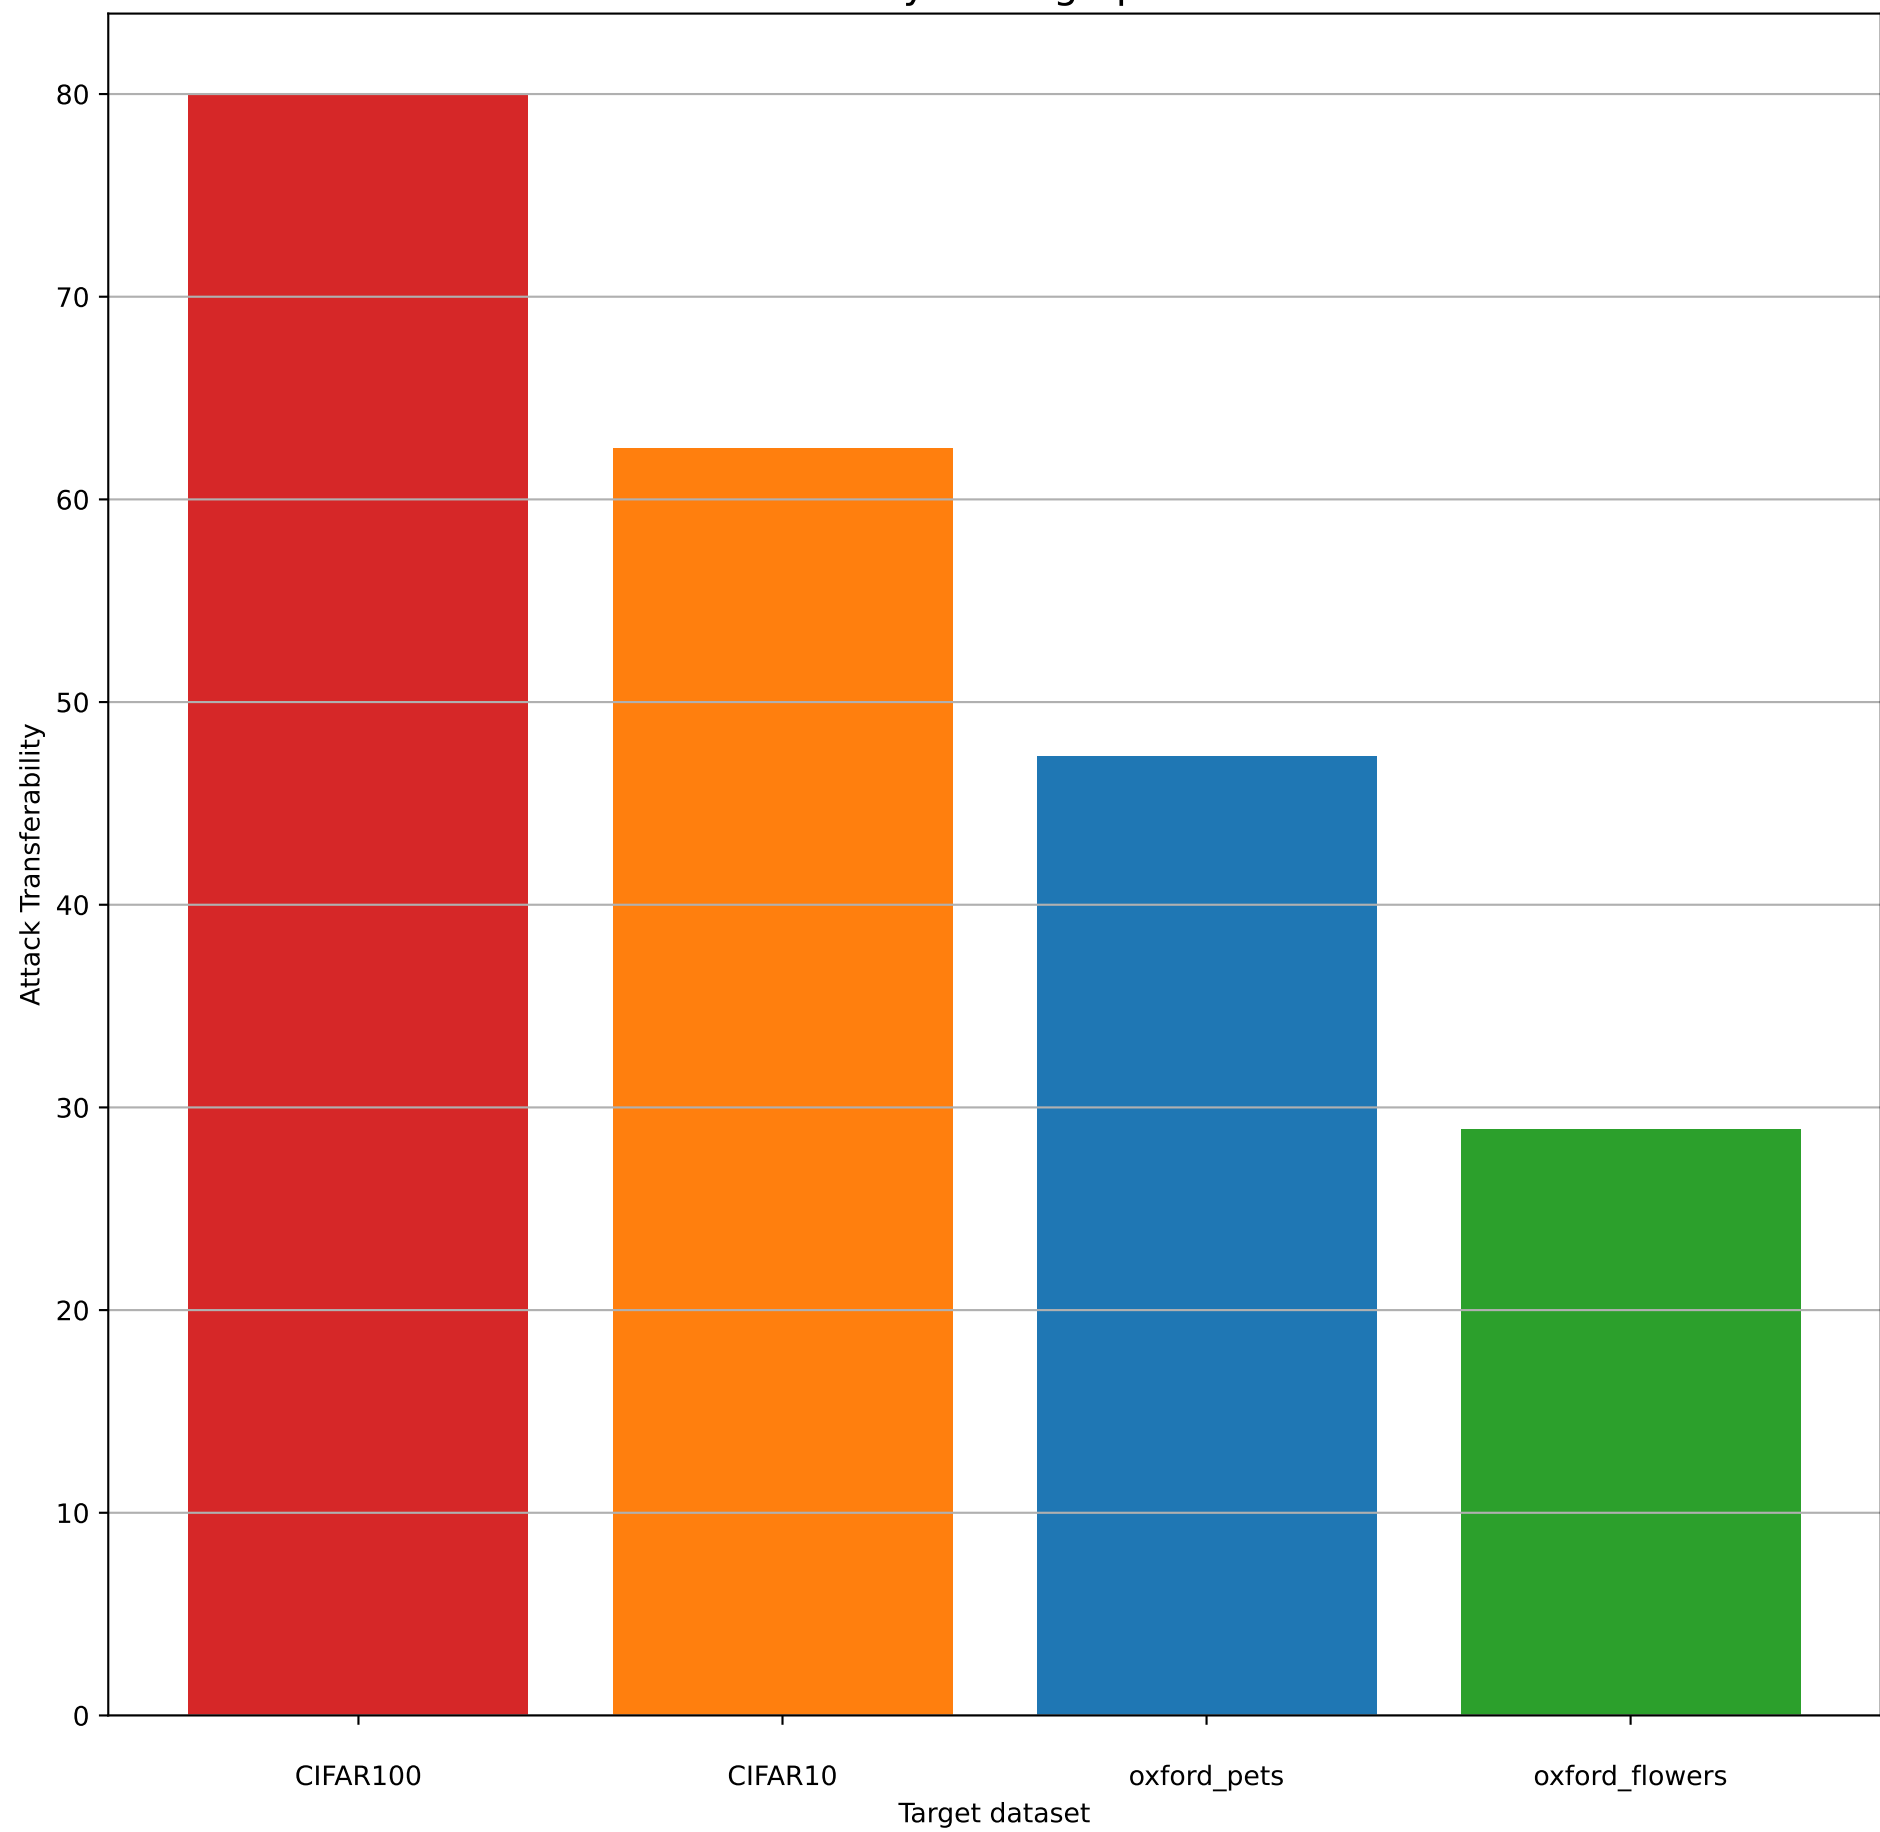

Supplement: supplementary_material [file transferability_average_per_dataset.pdf › adversarial_for_icml/figures/old/transferability_average_per_dataset.pdf]

Bar plot for proxy\_tune\_depth vs target\_tune\_depth

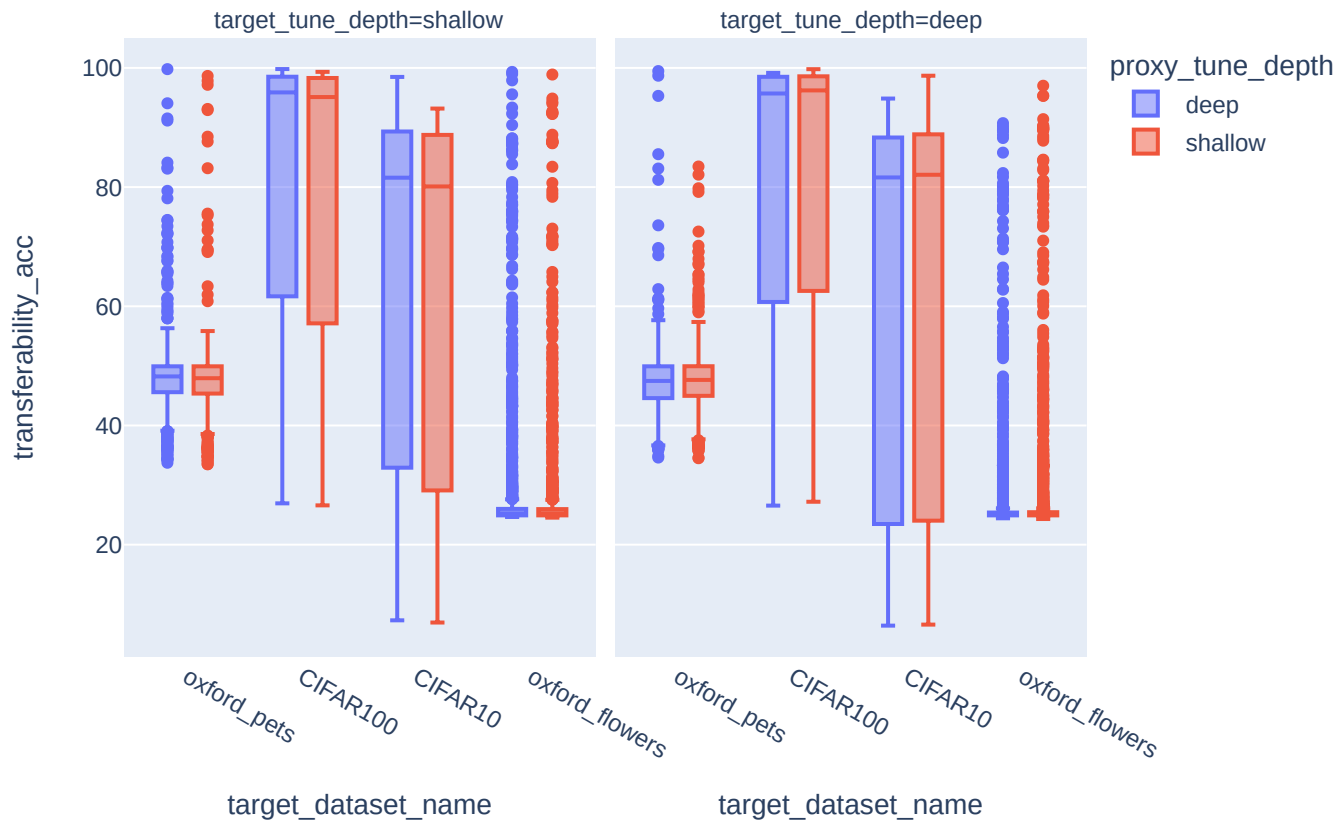

Supplement: supplementary_material [file transferability_box_averaged_per_model_proxy_tune_depth_target_tune_depth.pdf › adversarial_for_icml/figures/old/transferability_box_averaged_per_model_proxy_tune_depth_target_tune_depth.pdf]

Bar plot for proxy\_tune\_mode vs target\_tune\_mode

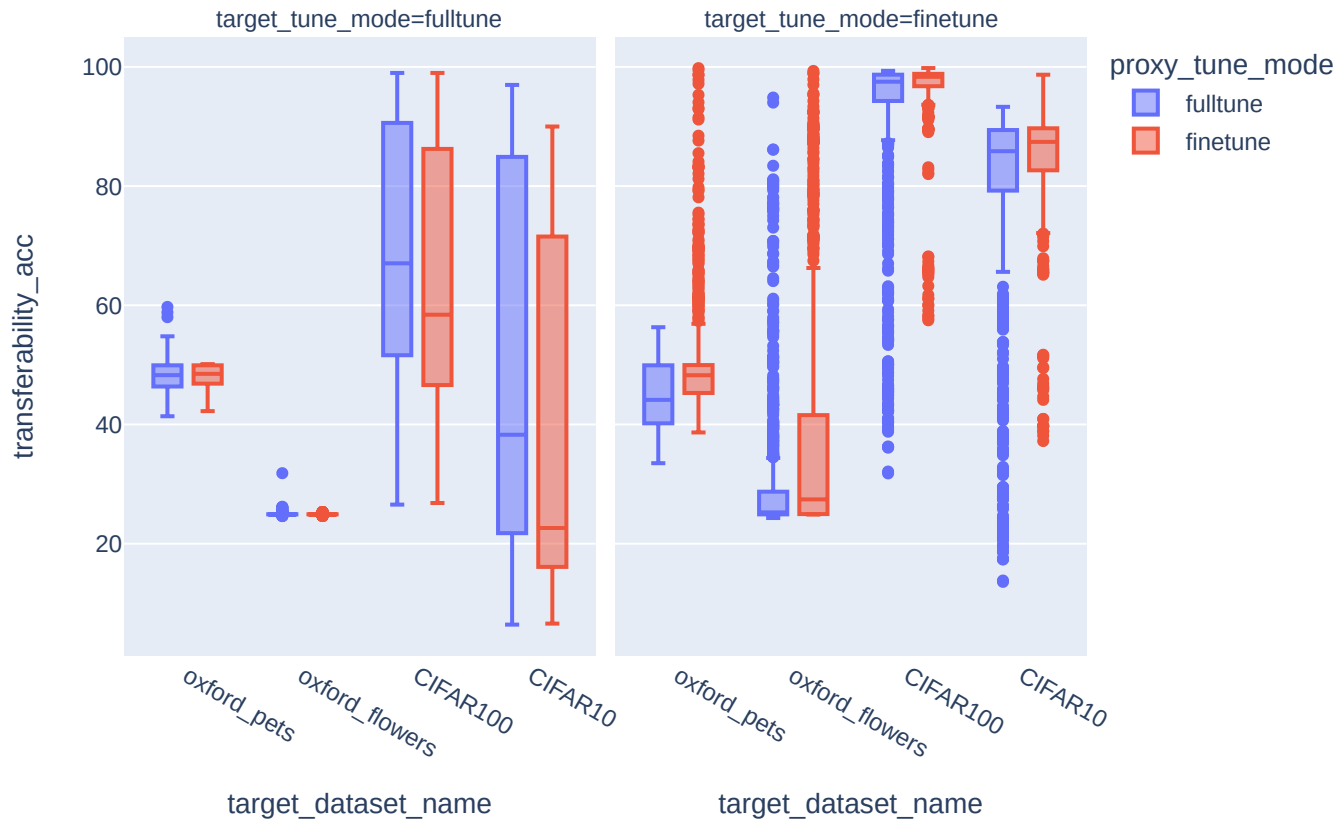

Supplement: supplementary_material [file transferability_box_averaged_per_model_proxy_tune_mode_target_tune_mode.pdf › adversarial_for_icml/figures/old/transferability_box_averaged_per_model_proxy_tune_mode_target_tune_mode.pdf]

Adversarial Transferability For Different Datasets



Supplement: supplementary_material [file transferability_datasets_not_longerPGD.pdf › adversarial_for_icml/figures/old/transferability_datasets_not_longerPGD.pdf]

Adversarial Transferability For Different Datasets

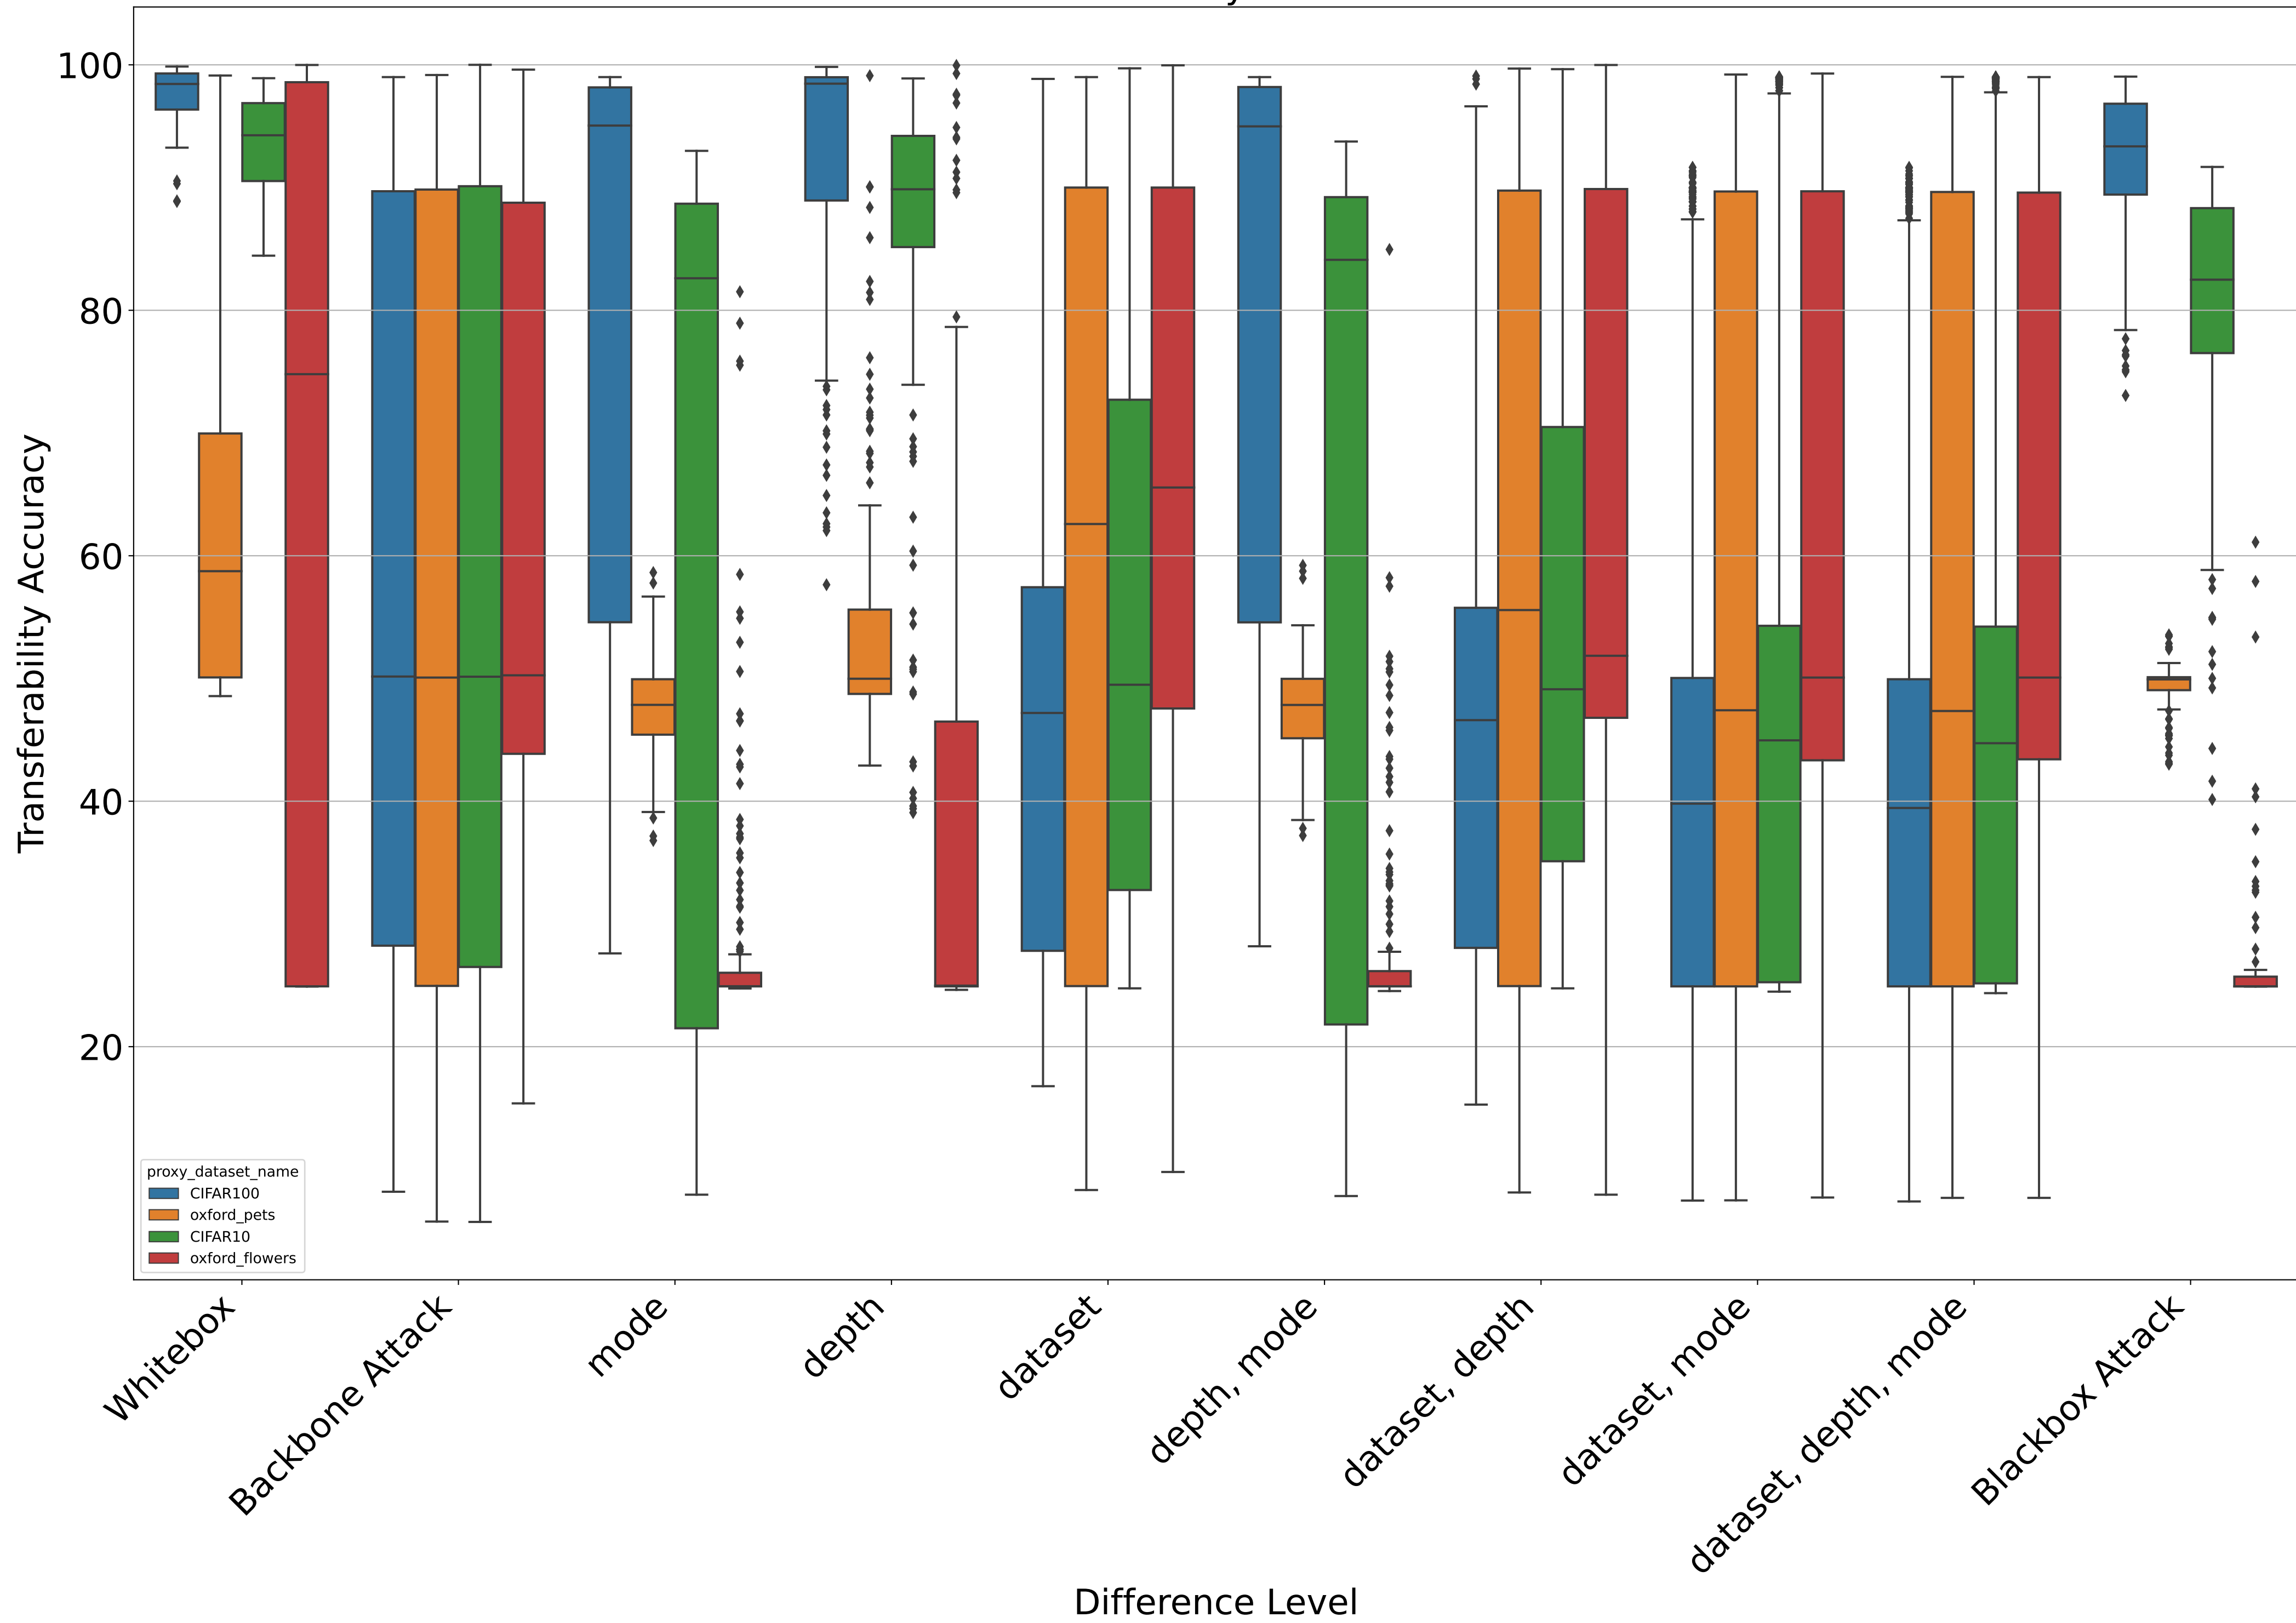

Supplement: supplementary_material [file transferability_datasets_proxy_with_longerPGD.pdf › adversarial_for_icml/figures/old/transferability_datasets_proxy_with_longerPGD.pdf]

# Adversarial Transferability For Different Attacks

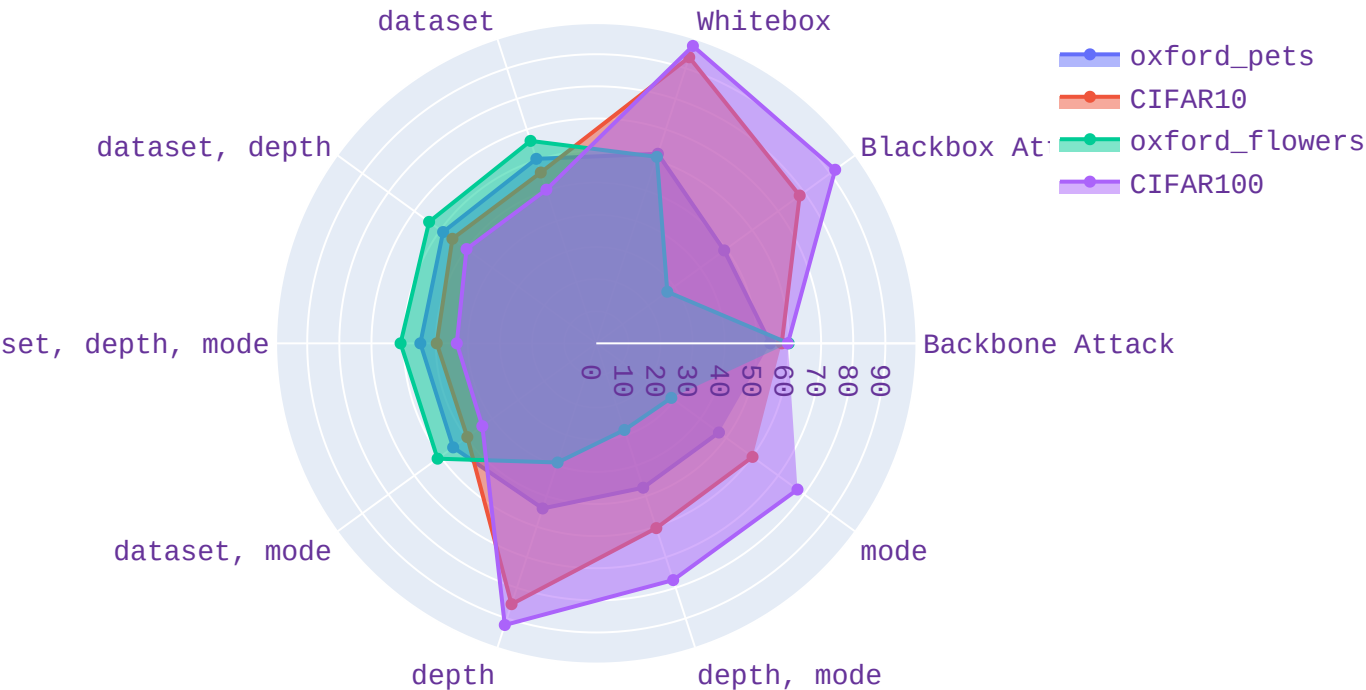

Supplement: supplementary_material [file transferability_datasets_spider_with_longerPGD.pdf › adversarial_for_icml/figures/old/transferability_datasets_spider_with_longerPGD.pdf]

# Adversarial Transferability For Different Attacks

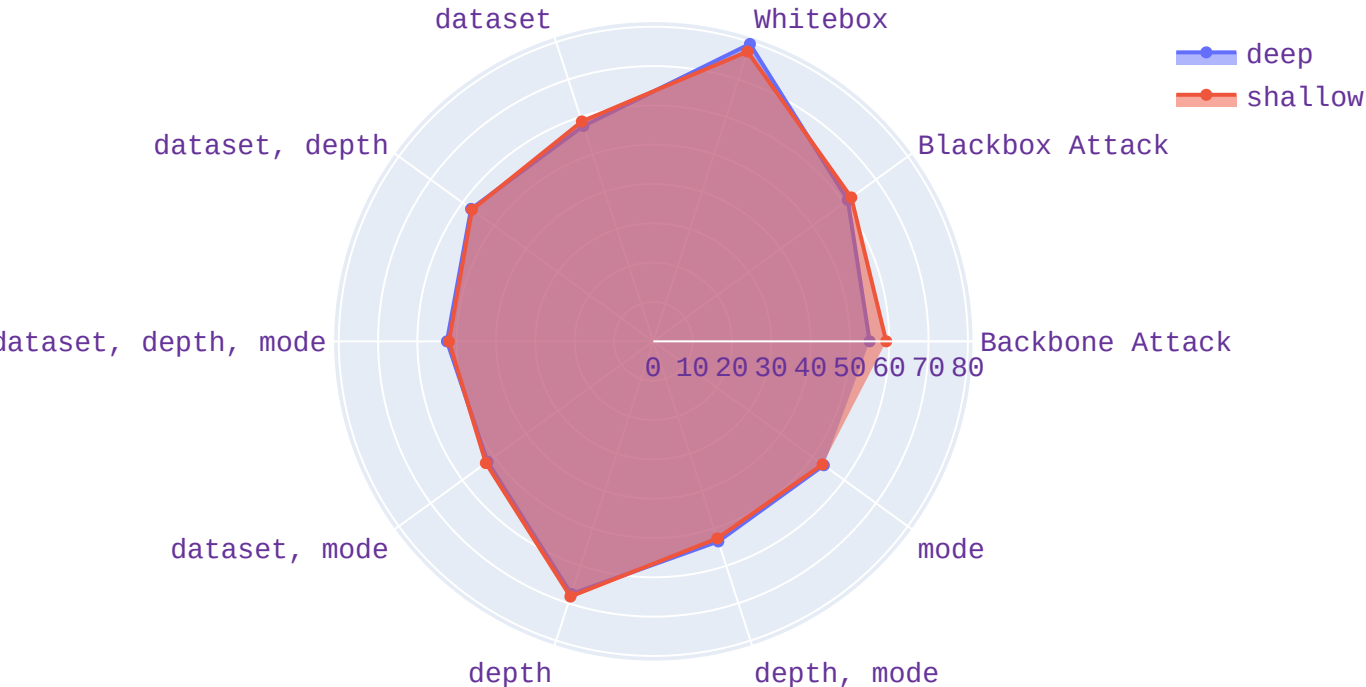

Supplement: supplementary_material [file transferability_finetechniques_spider_with_longerPGD.pdf › adversarial_for_icml/figures/old/transferability_finetechniques_spider_with_longerPGD.pdf]

Adversarial Transferability For Different Fine-Tuning Techniques



Supplement: supplementary_material [file transferability_finetuning_techniques_not_longerPGD.pdf › adversarial_for_icml/figures/old/transferability_finetuning_techniques_not_longerPGD.pdf]

# Adversarial Transferability For Different Attacks

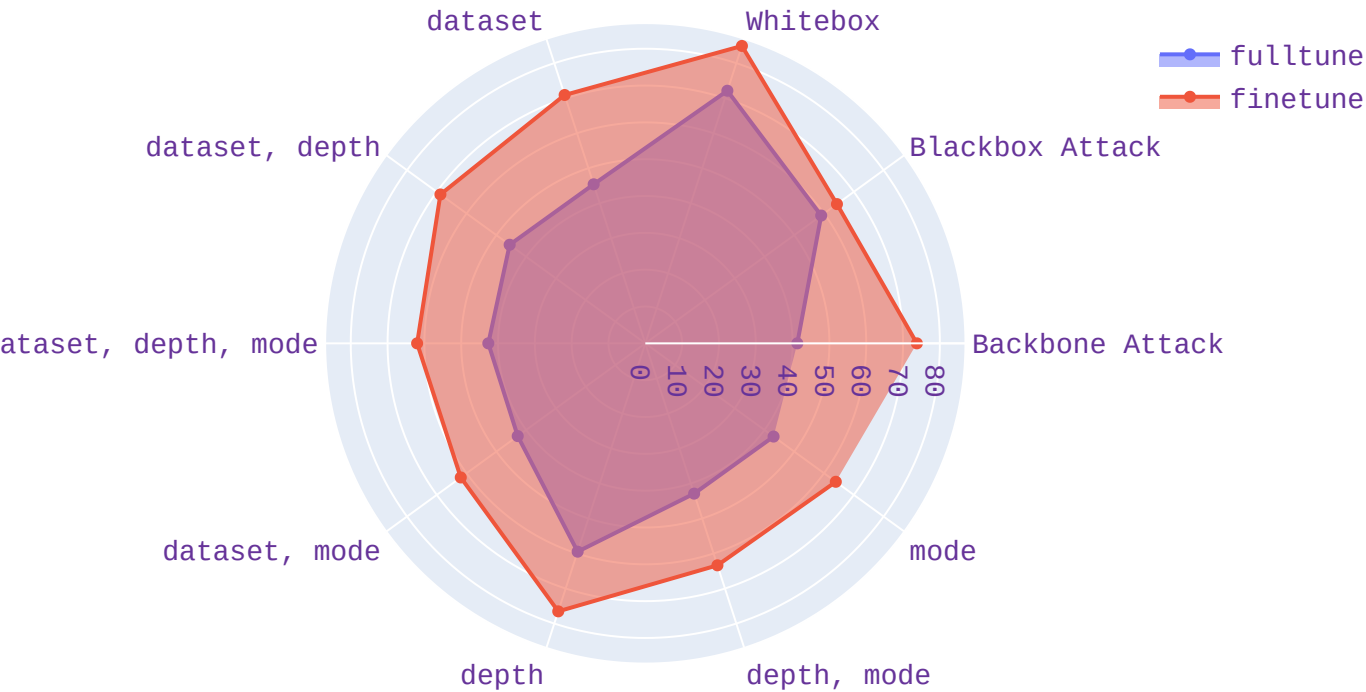

Supplement: supplementary_material [file transferability_finetuning_techniques_spider_with_longerPGD.pdf › adversarial_for_icml/figures/old/transferability_finetuning_techniques_spider_with_longerPGD.pdf]

Adversarial Transferability For Different Fine-Tuning Techniques

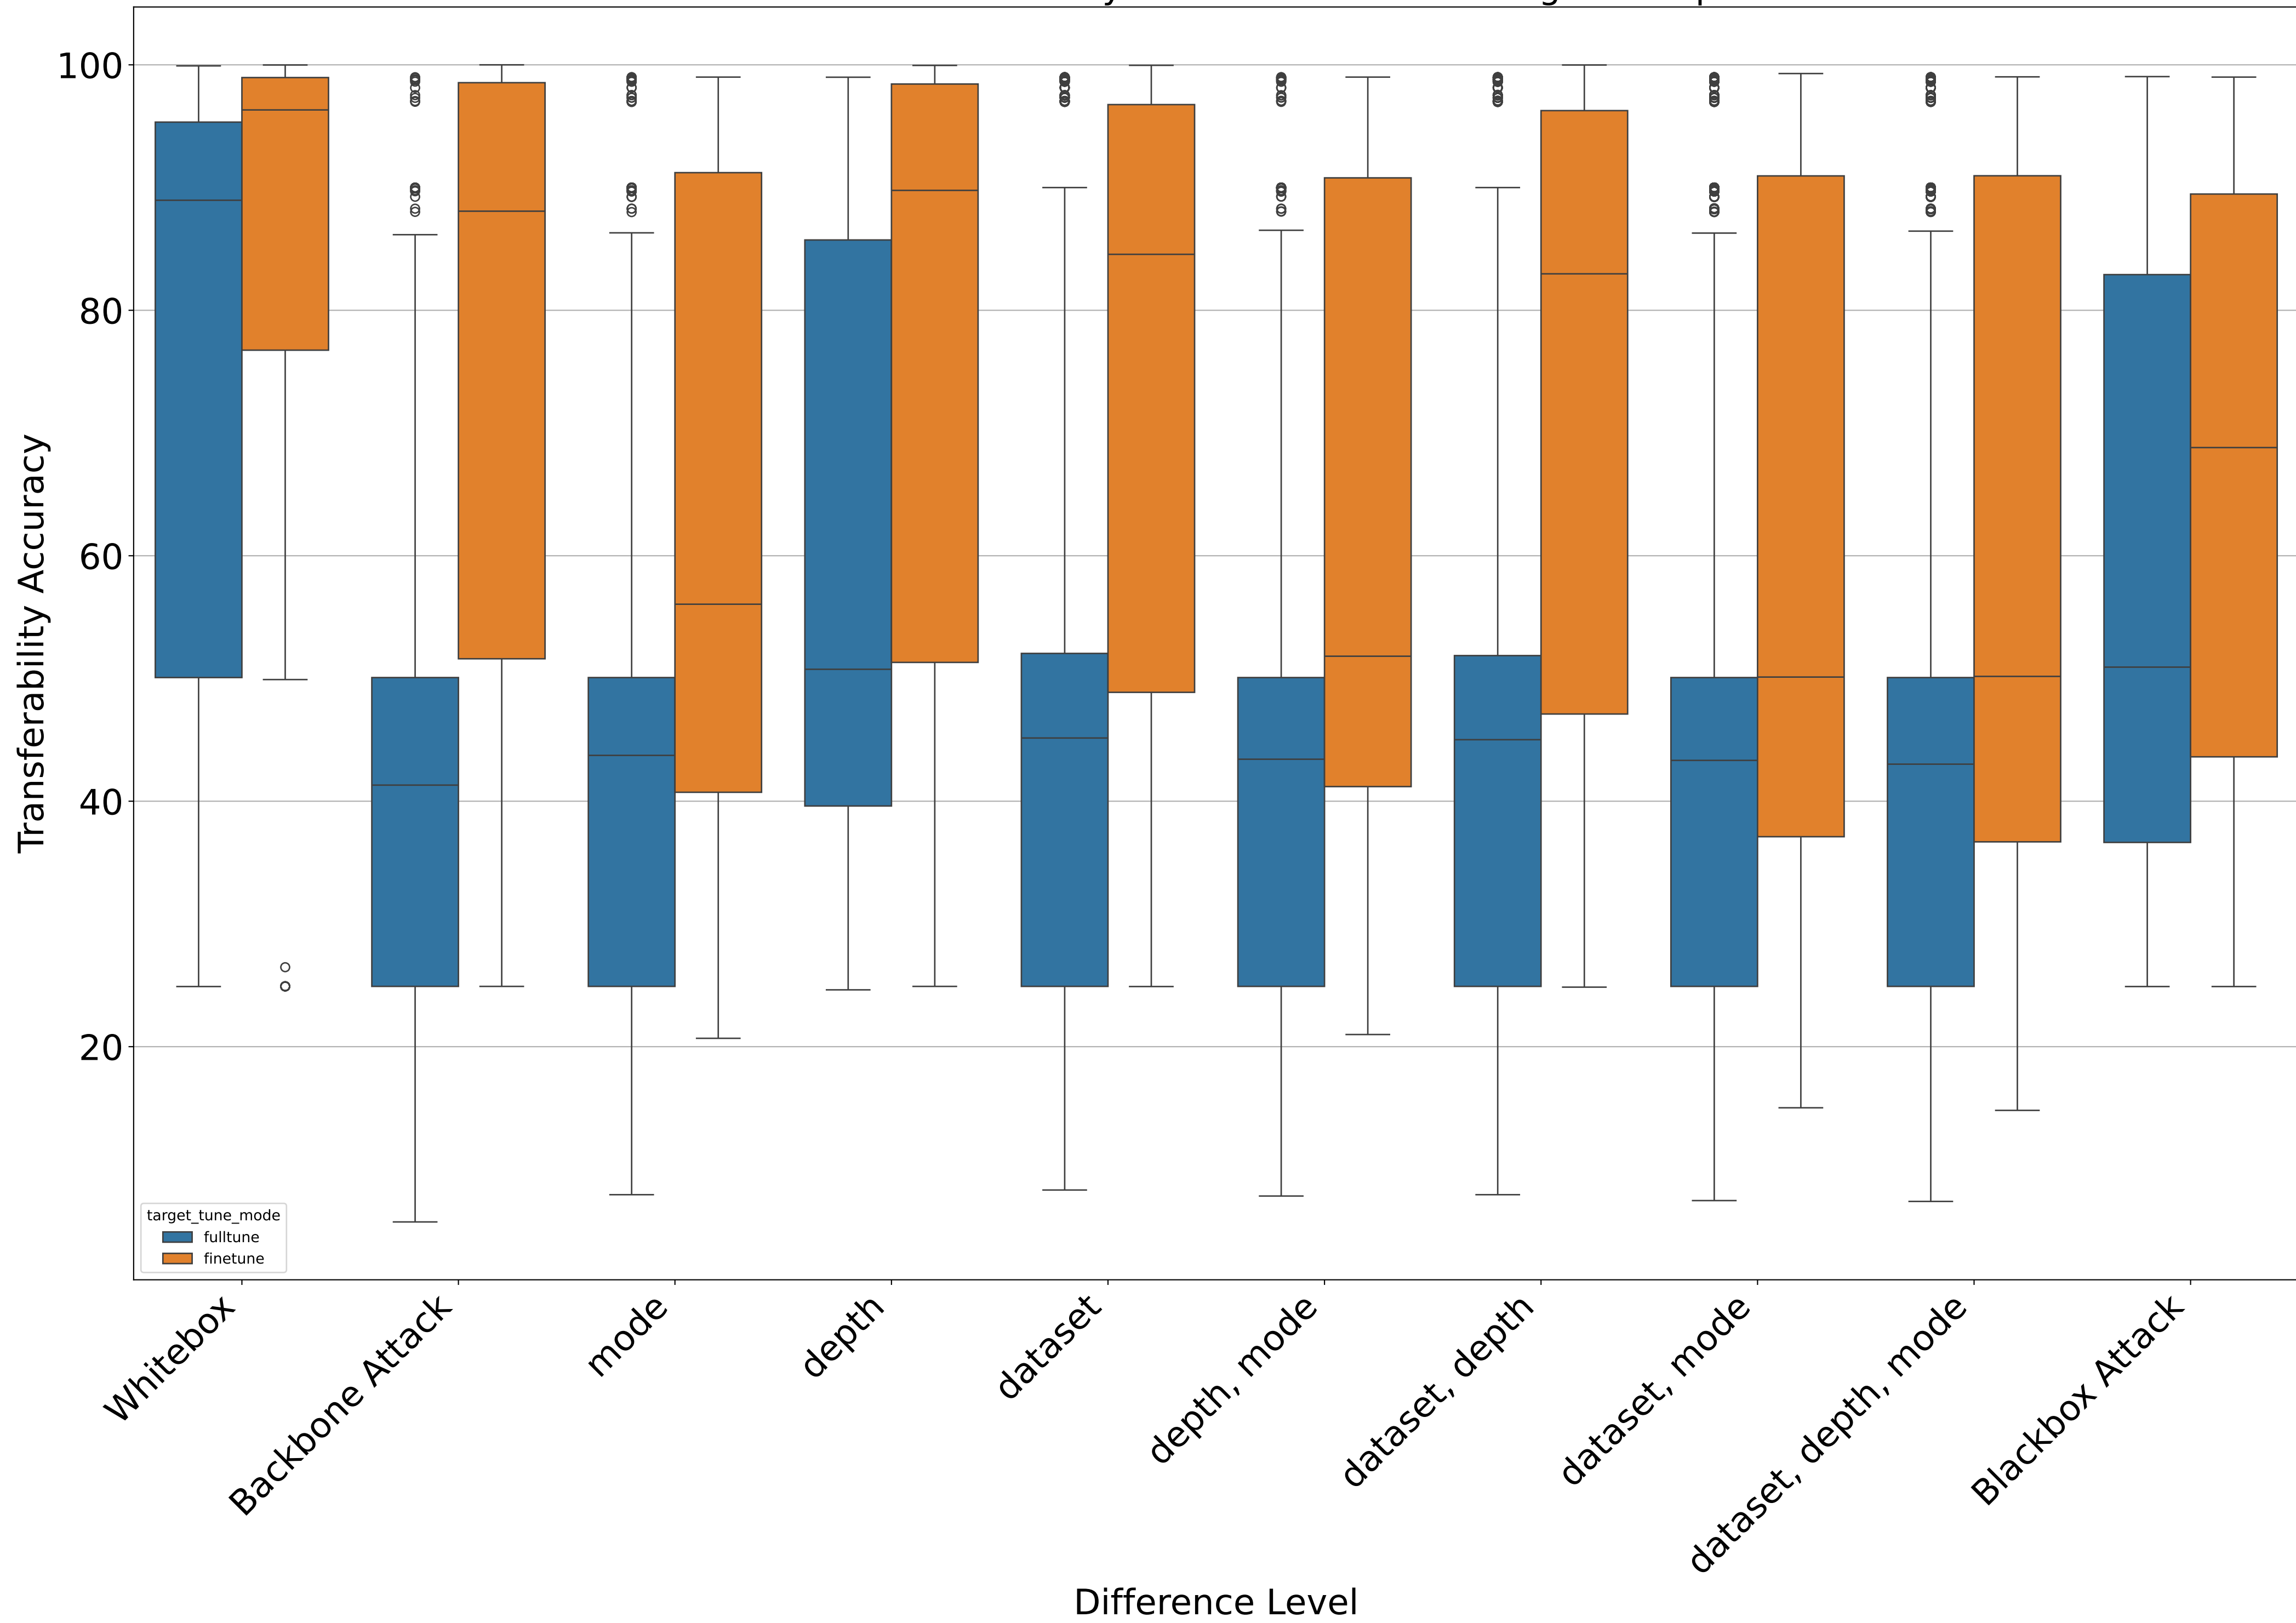

Supplement: supplementary_material [file transferability_finetuning_techniques_with_longerPGD.pdf › adversarial_for_icml/figures/old/transferability_finetuning_techniques_with_longerPGD.pdf]

Adversarial Transferability For Different Fine-Tuning Types

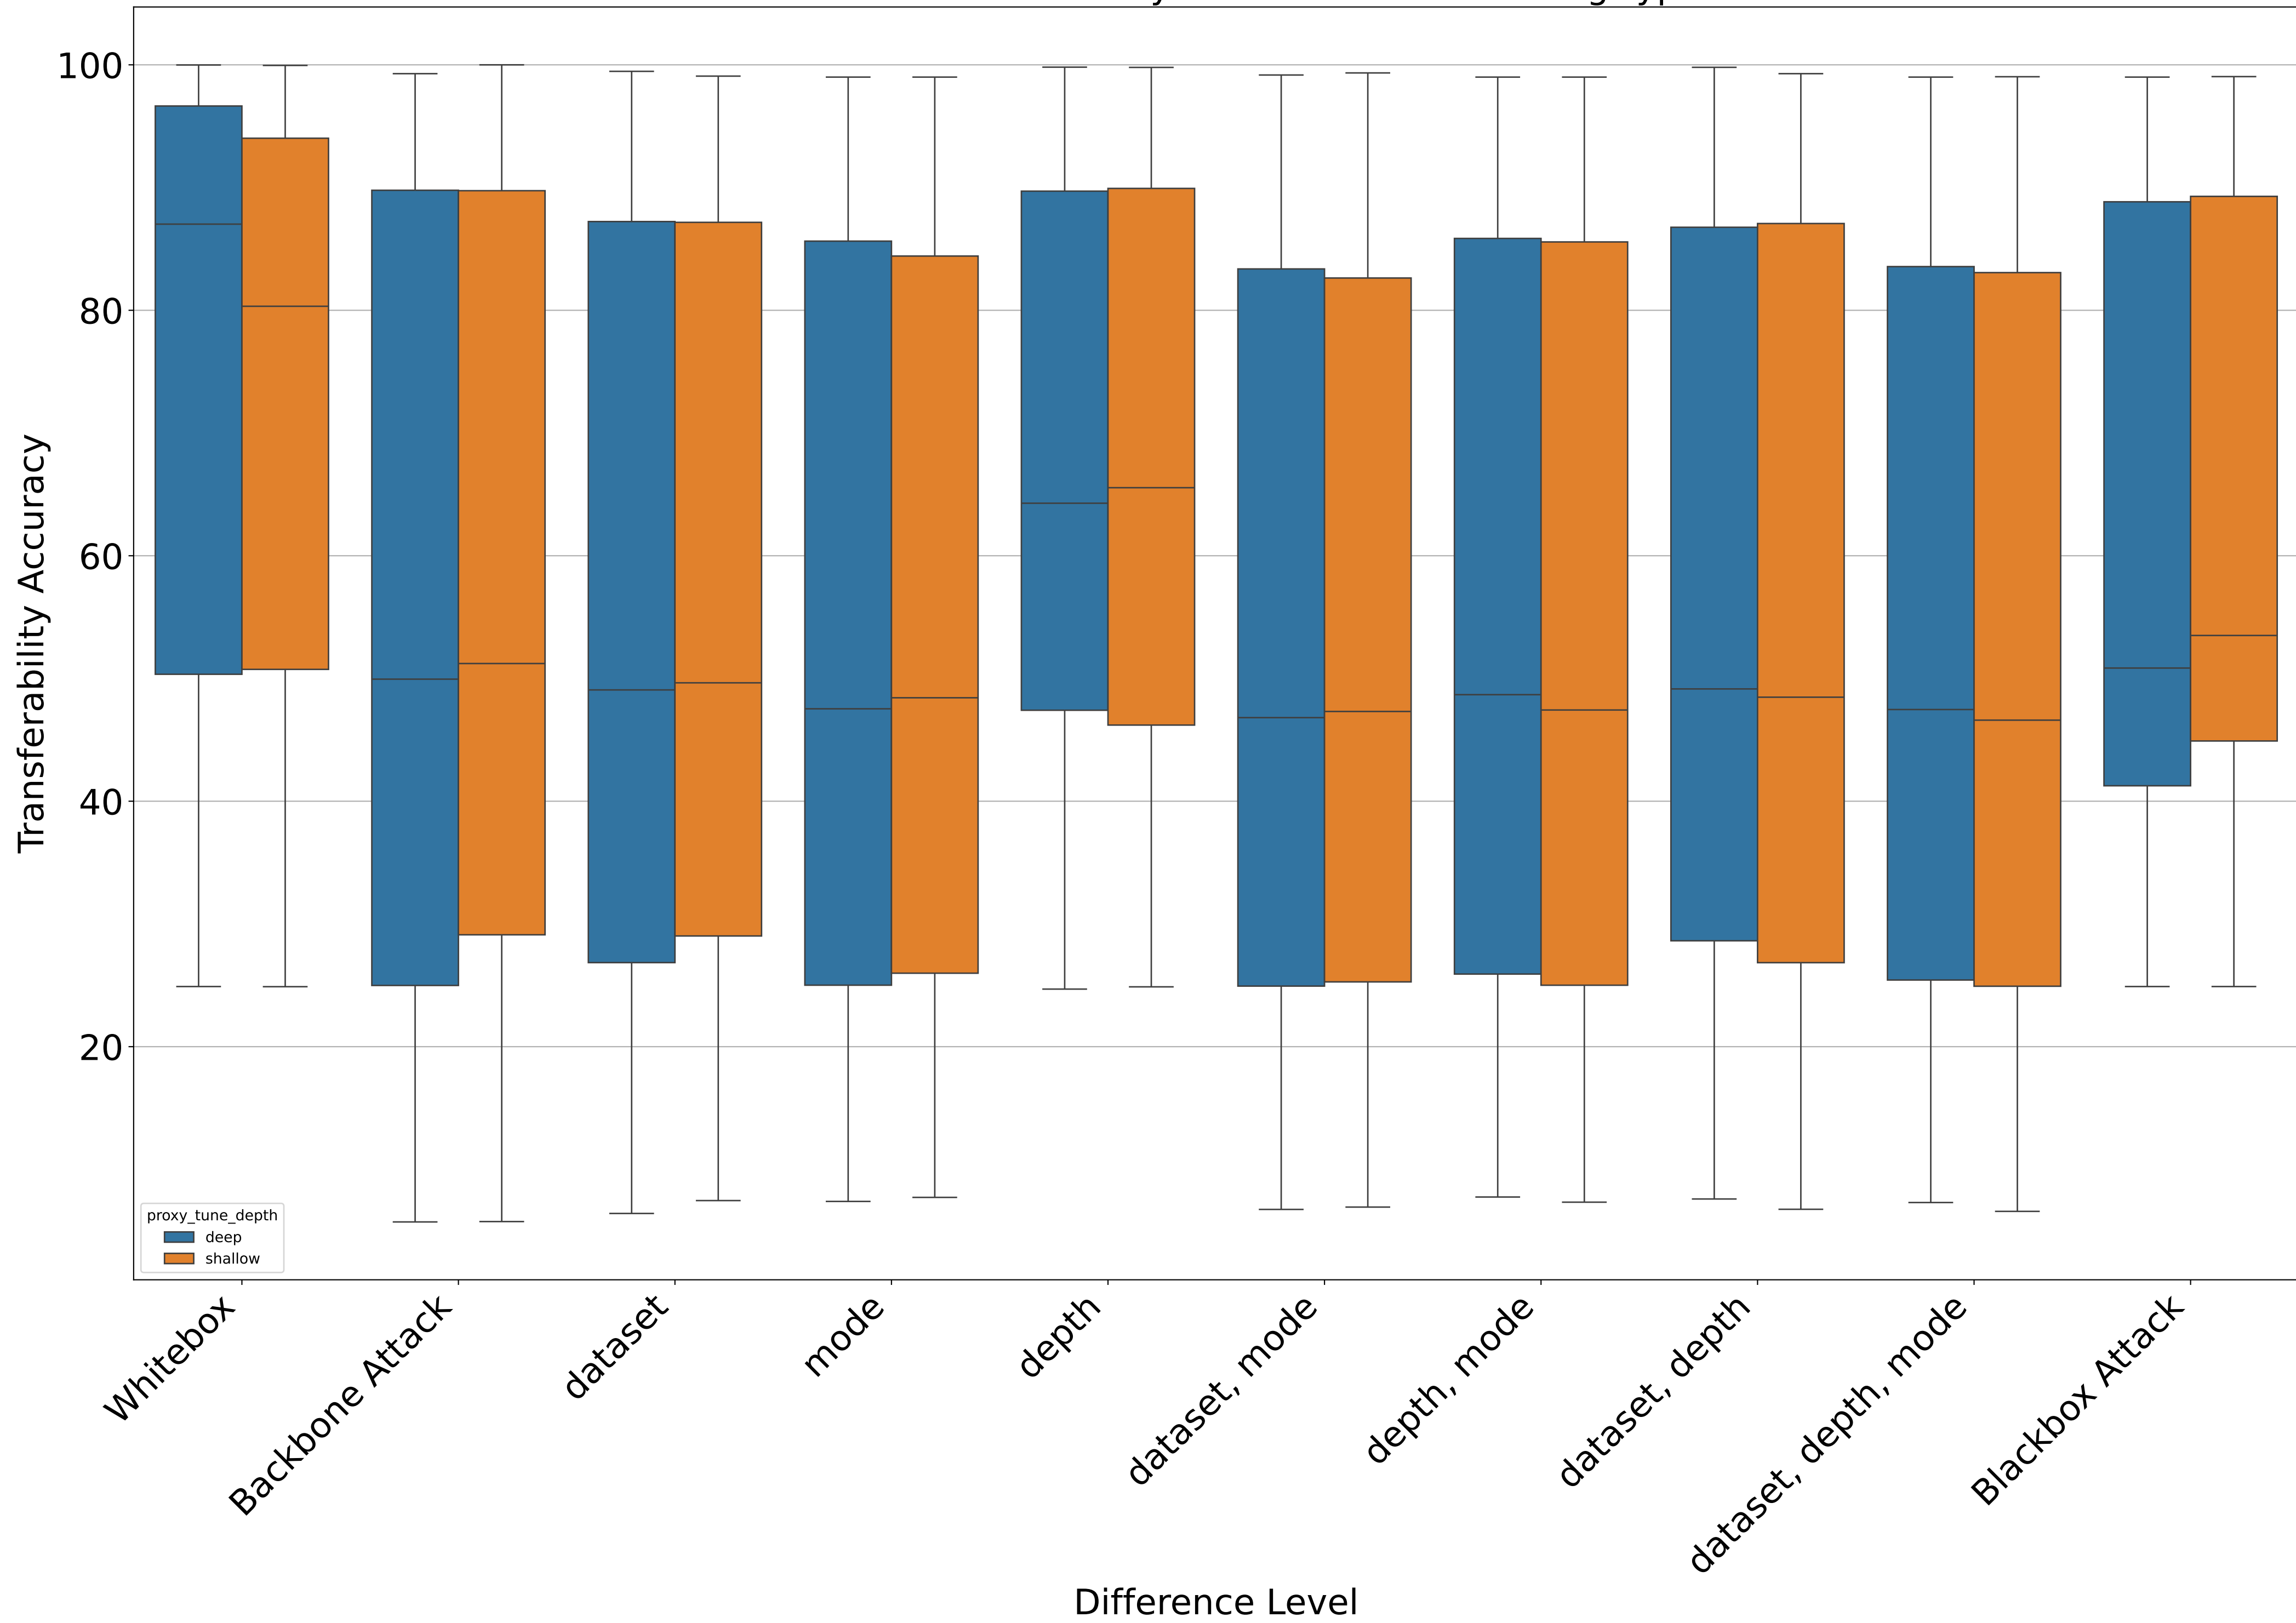

Supplement: supplementary_material [file transferability_finetuning_types_not_longerPGD.pdf › adversarial_for_icml/figures/old/transferability_finetuning_types_not_longerPGD.pdf]

# Adversarial Transferability For Different Attacks

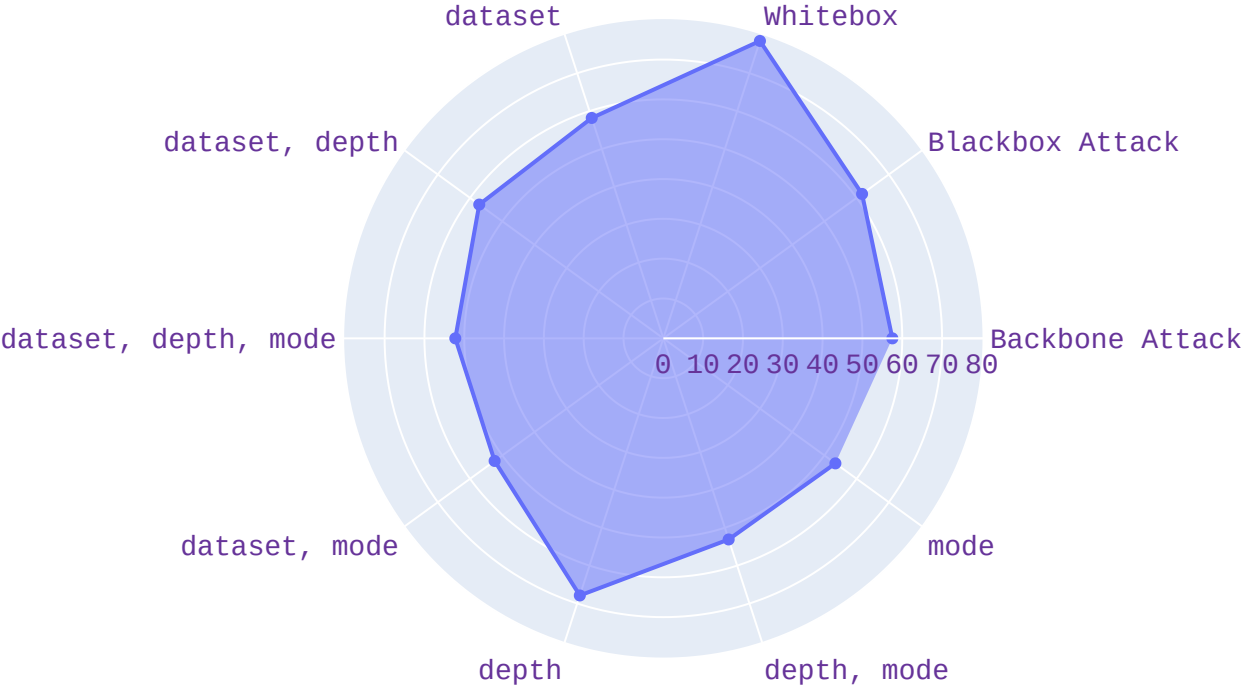

Supplement: supplementary_material [file transferability_spiider_with_longerPGD.pdf › adversarial_for_icml/figures/old/transferability_spiider_with_longerPGD.pdf]

Adversarial Transferability For Targeted vs non-Targeted Attacks



Supplement: supplementary_material [file transferability_targeted_untargeted_not_longerPGD.pdf › adversarial_for_icml/figures/old/transferability_targeted_untargeted_not_longerPGD.pdf]

## Adversarial Transferability For Targeted vs non-Targeted Attacks

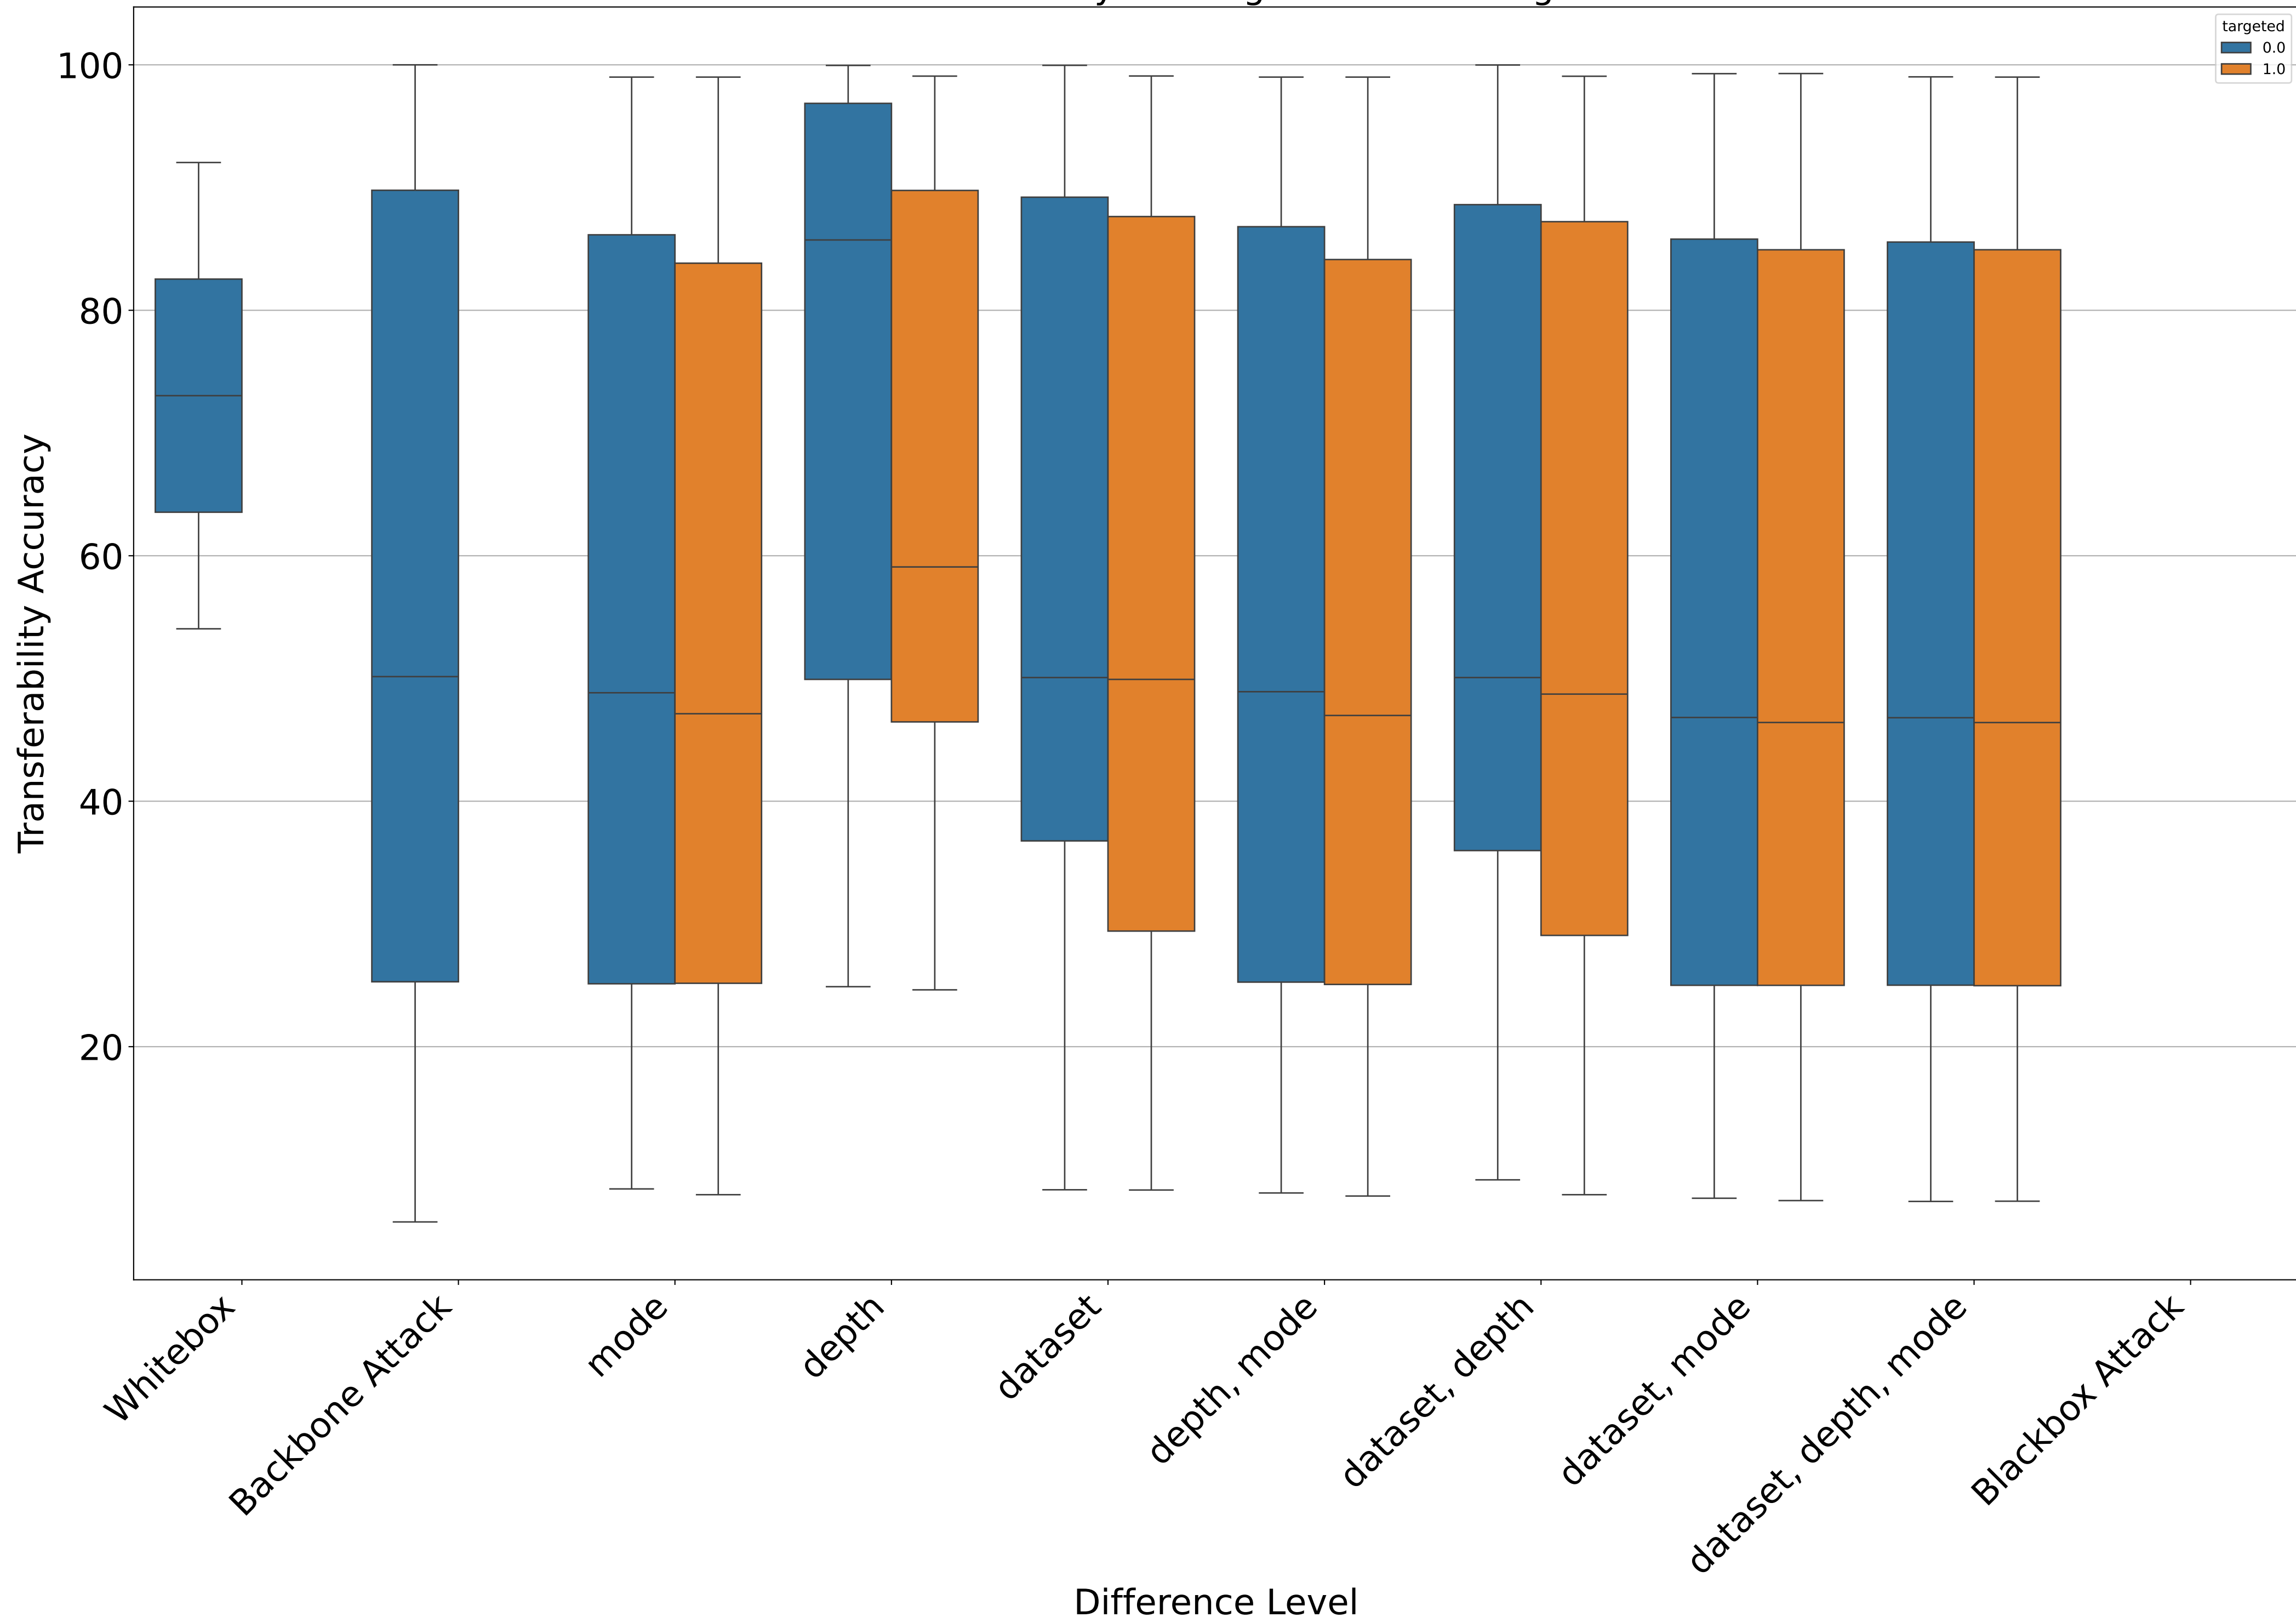

Supplement: supplementary_material [file transferability_targeted_untargeted_with_longerPGD.pdf › adversarial_for_icml/figures/old/transferability_targeted_untargeted_with_longerPGD.pdf]

Adversarial Transferability For Different Attacks

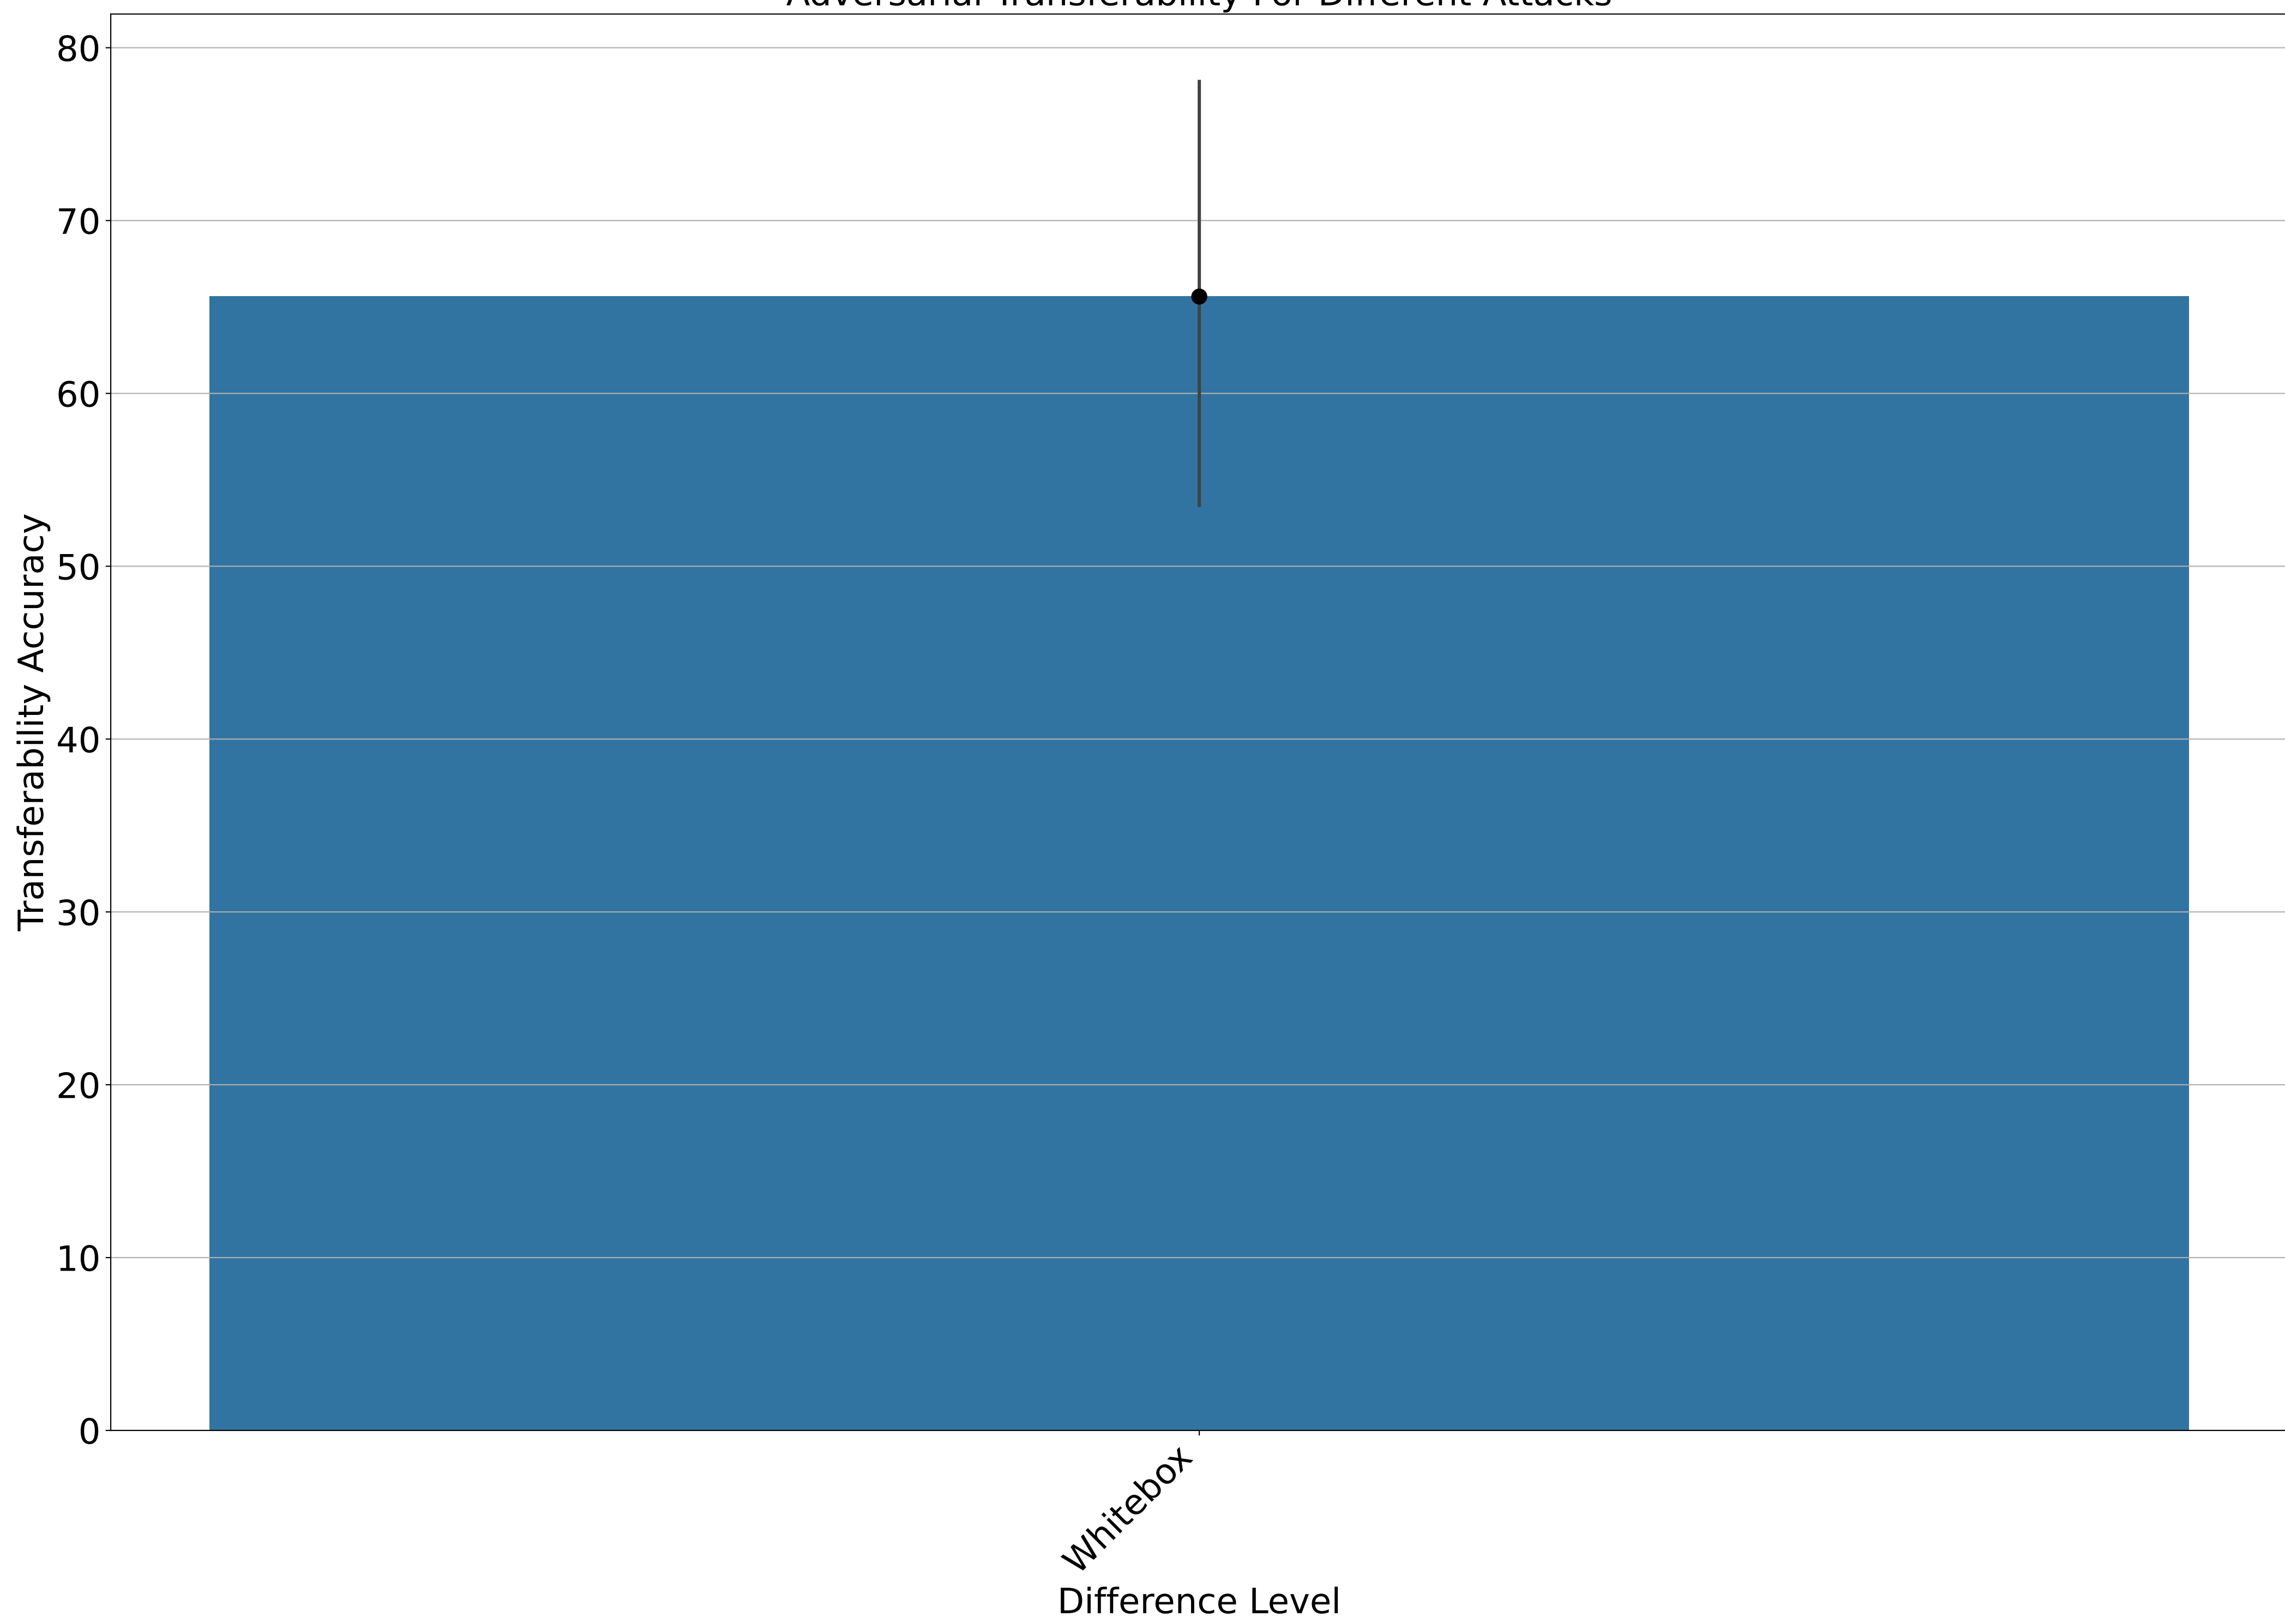

Supplement: supplementary_material [file swav_cross.pdf › adversarial_for_icml/figures/swav/swav_cross.pdf]

Comparison of PGD vs BackbonePGD by diff\_type

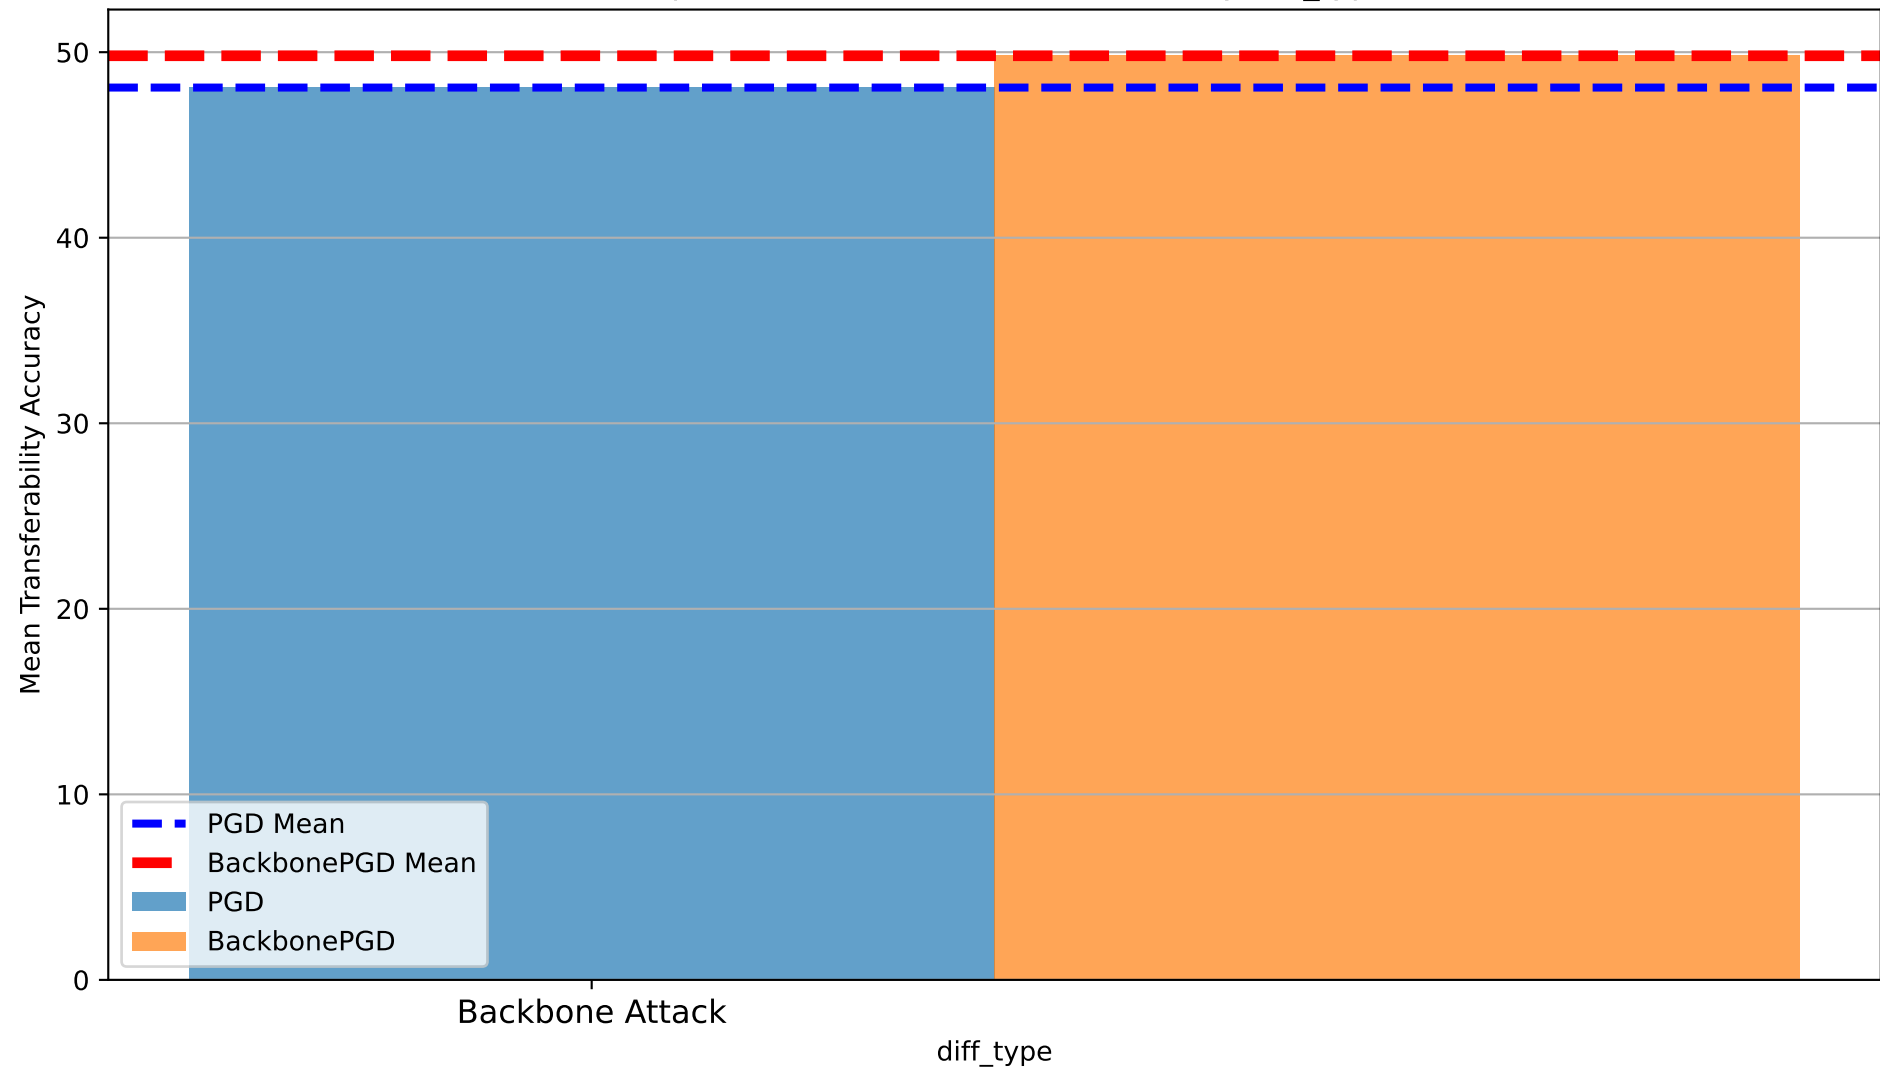

Supplement: supplementary_material [file swav_pgd_vs_backbone_pgd_diff_type.pdf › adversarial_for_icml/figures/swav/swav_pgd_vs_backbone_pgd_diff_type.pdf]

Comparison of PGD vs BackbonePGD by proxy\_dataset\_name

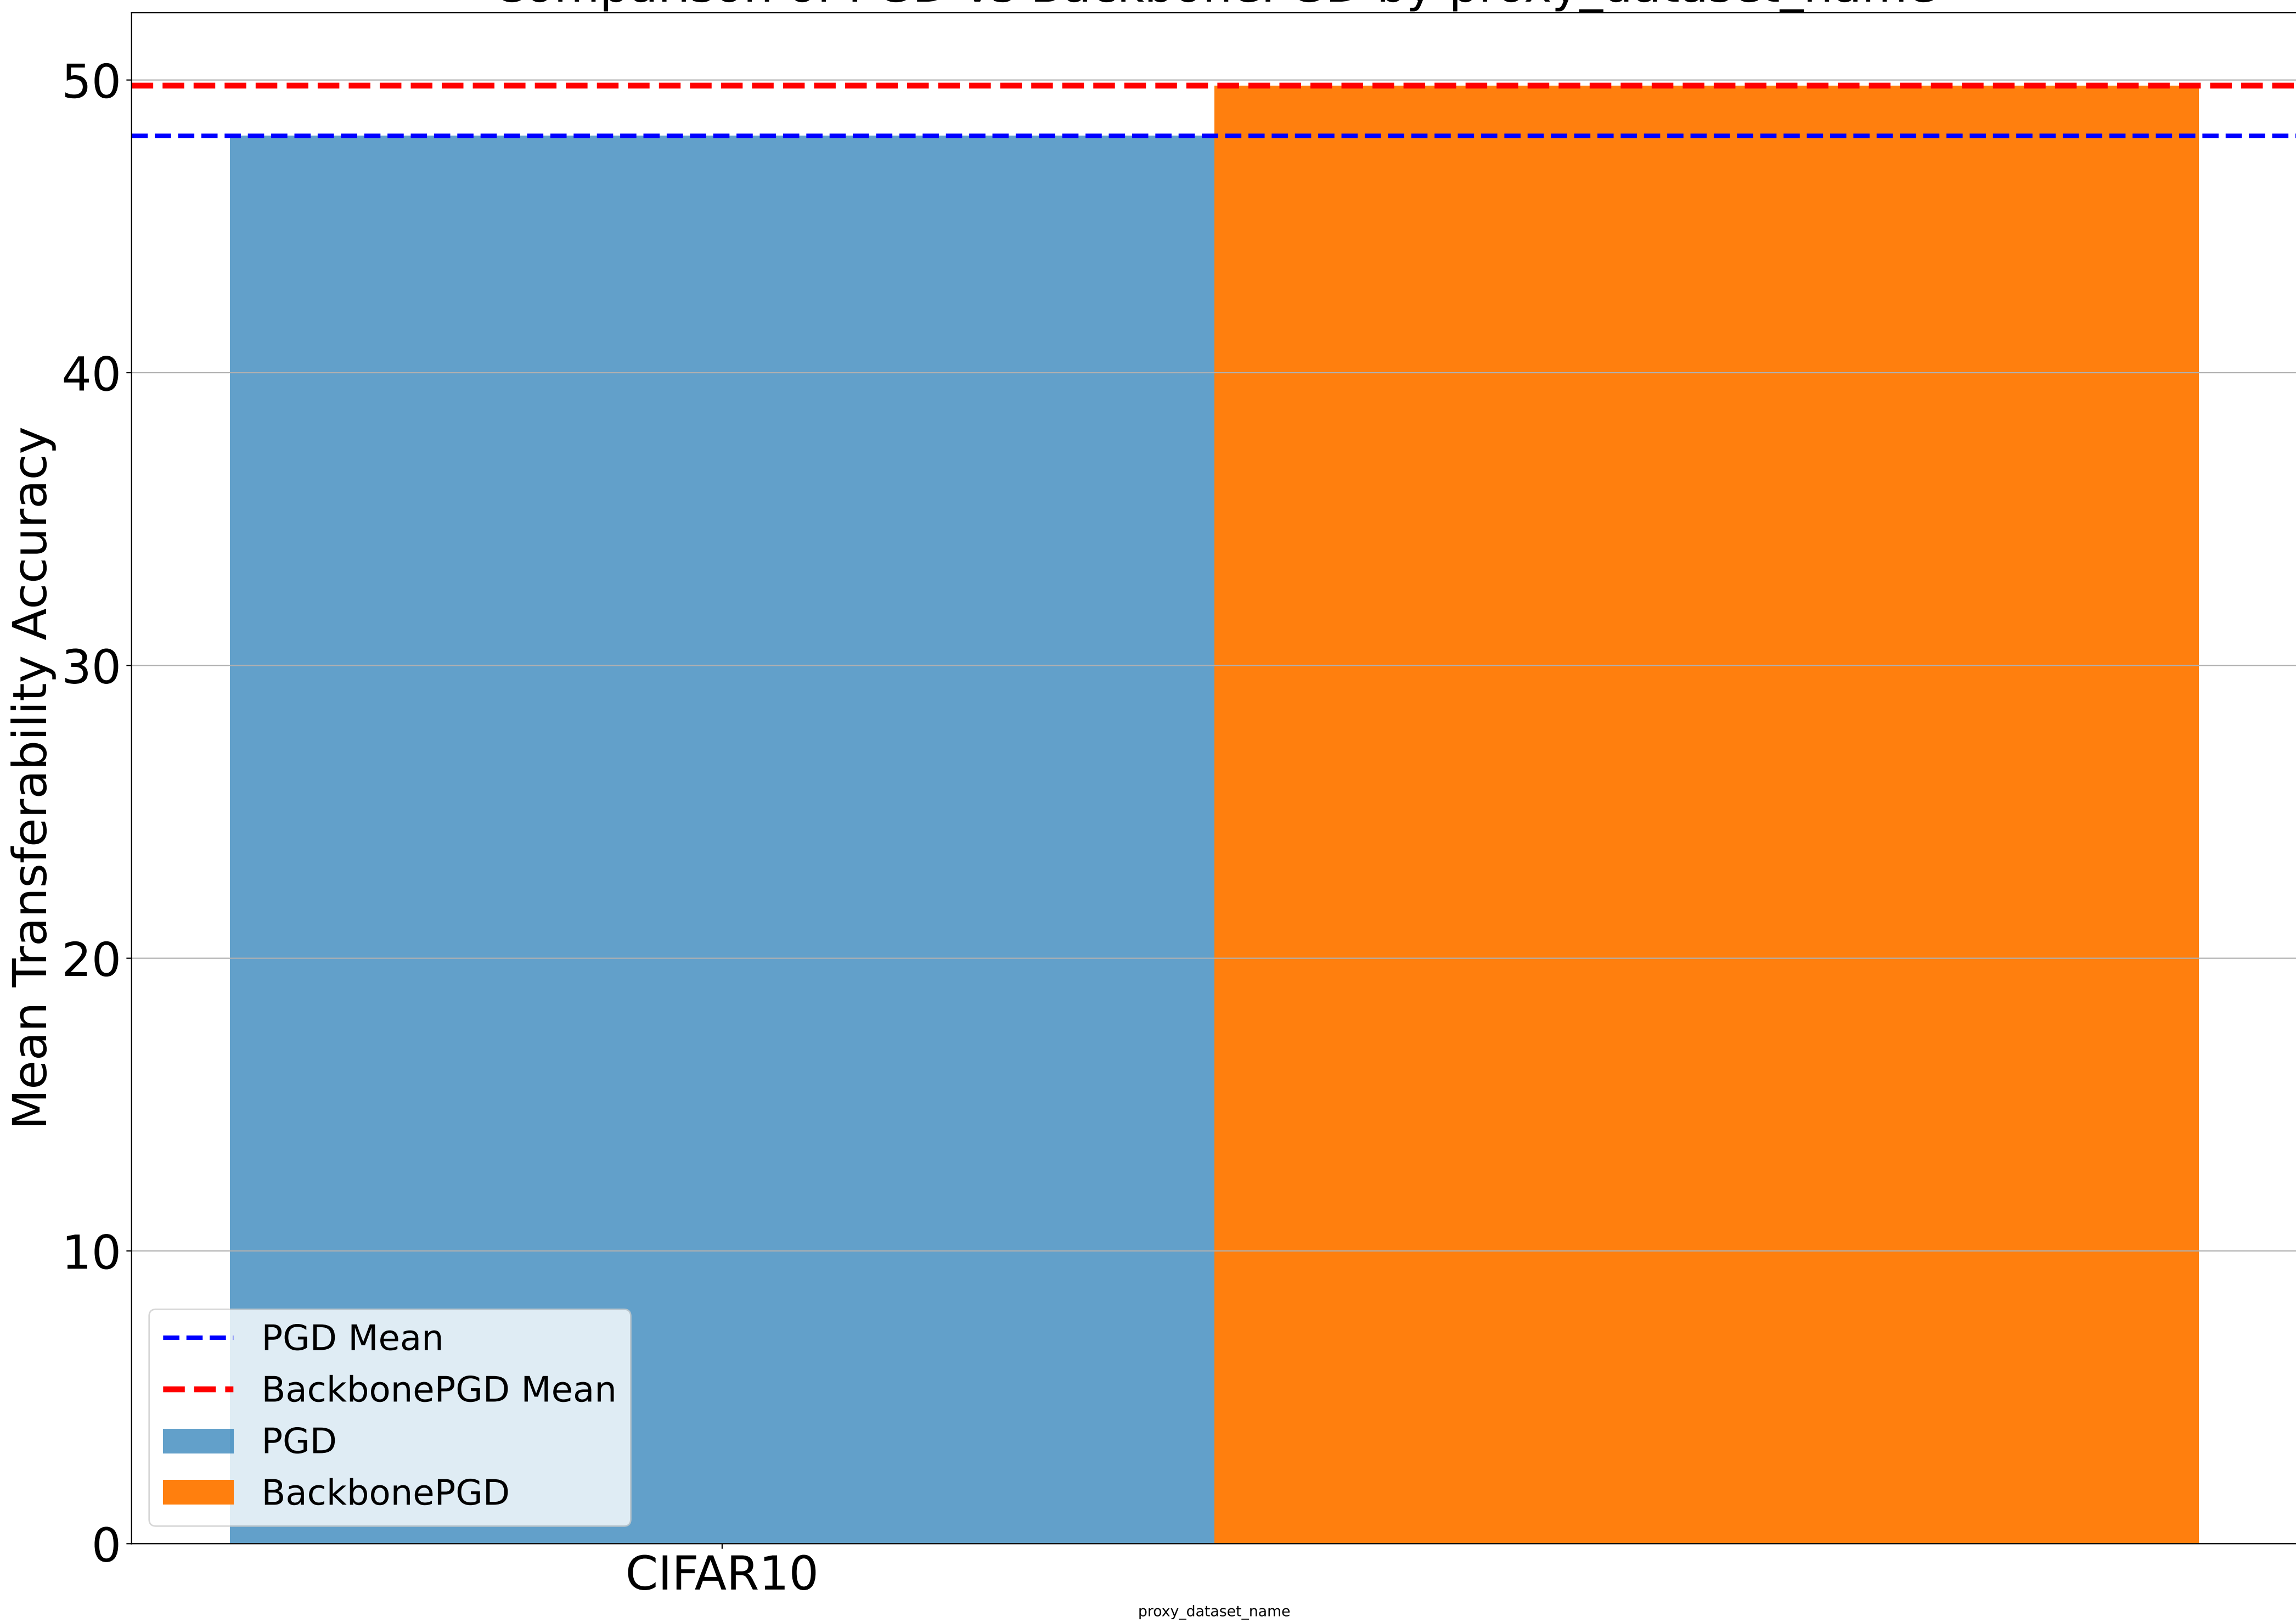

Supplement: supplementary_material [file swav_pgd_vs_backbone_pgd_proxy_dataset_name.pdf › adversarial_for_icml/figures/swav/swav_pgd_vs_backbone_pgd_proxy_dataset_name.pdf]

Comparison of PGD vs BackbonePGD by proxy\_tune\_depth

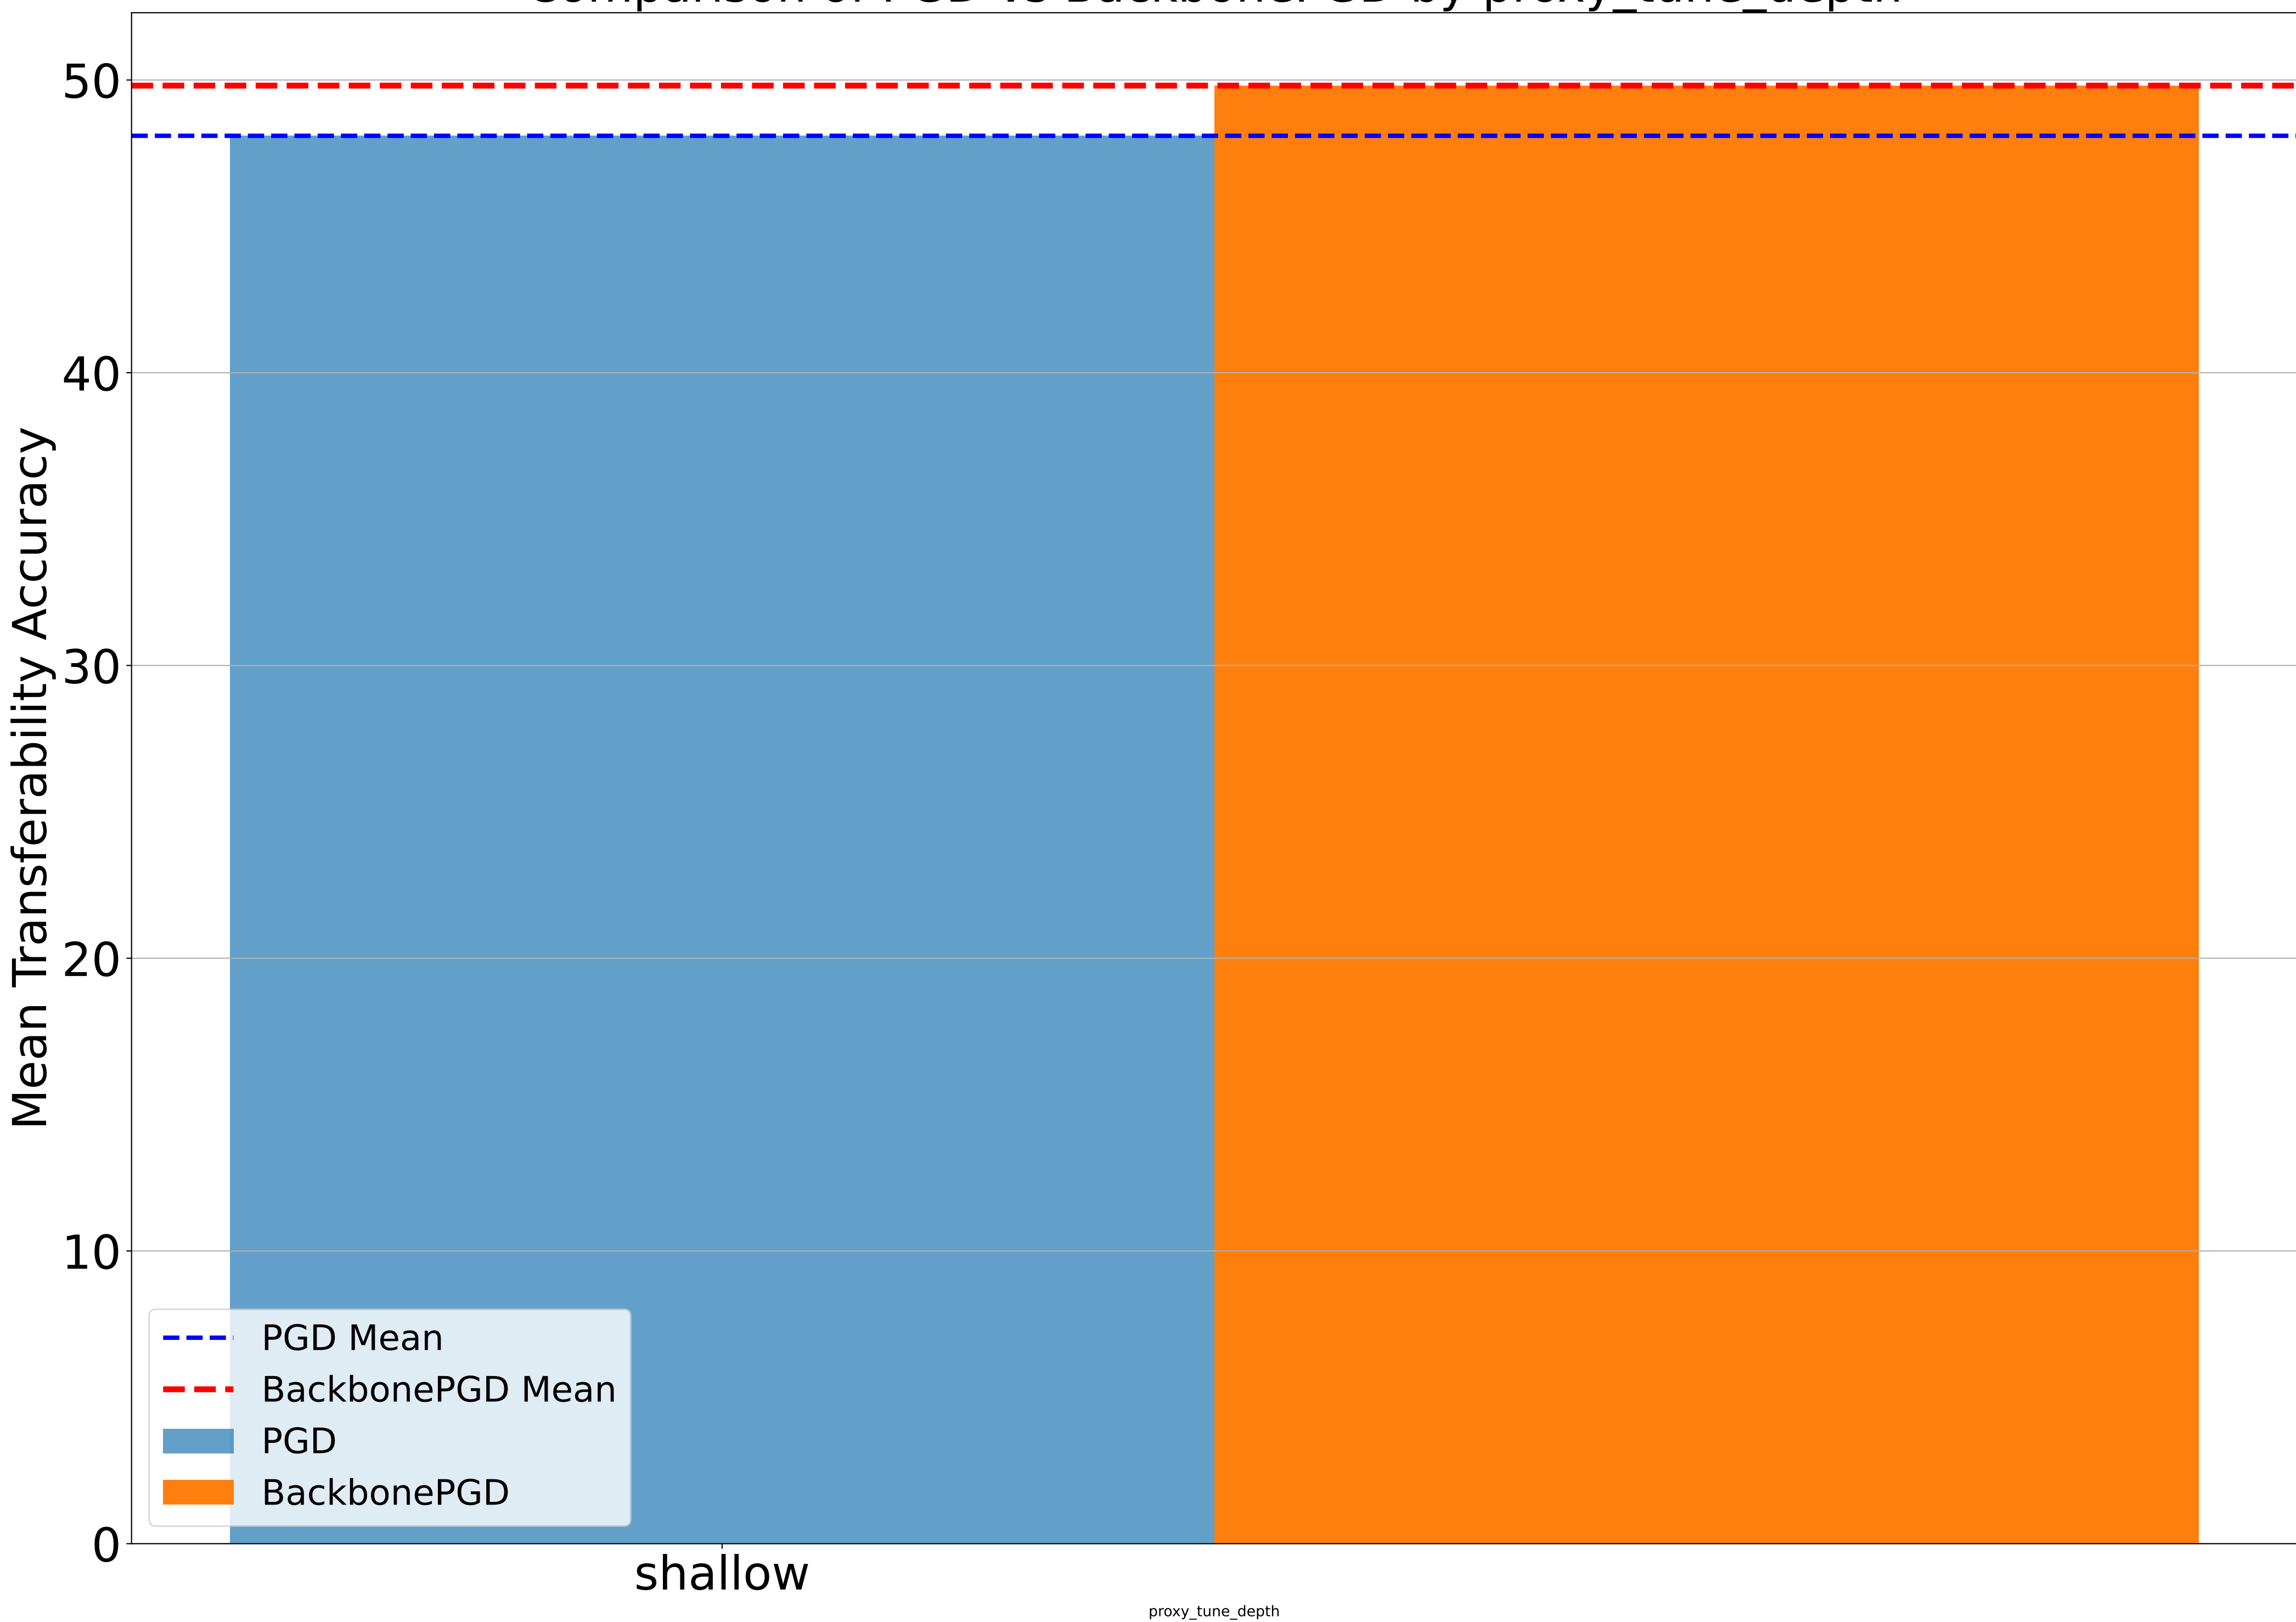

Supplement: supplementary_material [file swav_pgd_vs_backbone_pgd_proxy_tune_depth.pdf › adversarial_for_icml/figures/swav/swav_pgd_vs_backbone_pgd_proxy_tune_depth.pdf]

Comparison of PGD vs BackbonePGD by proxy\_tune\_mode

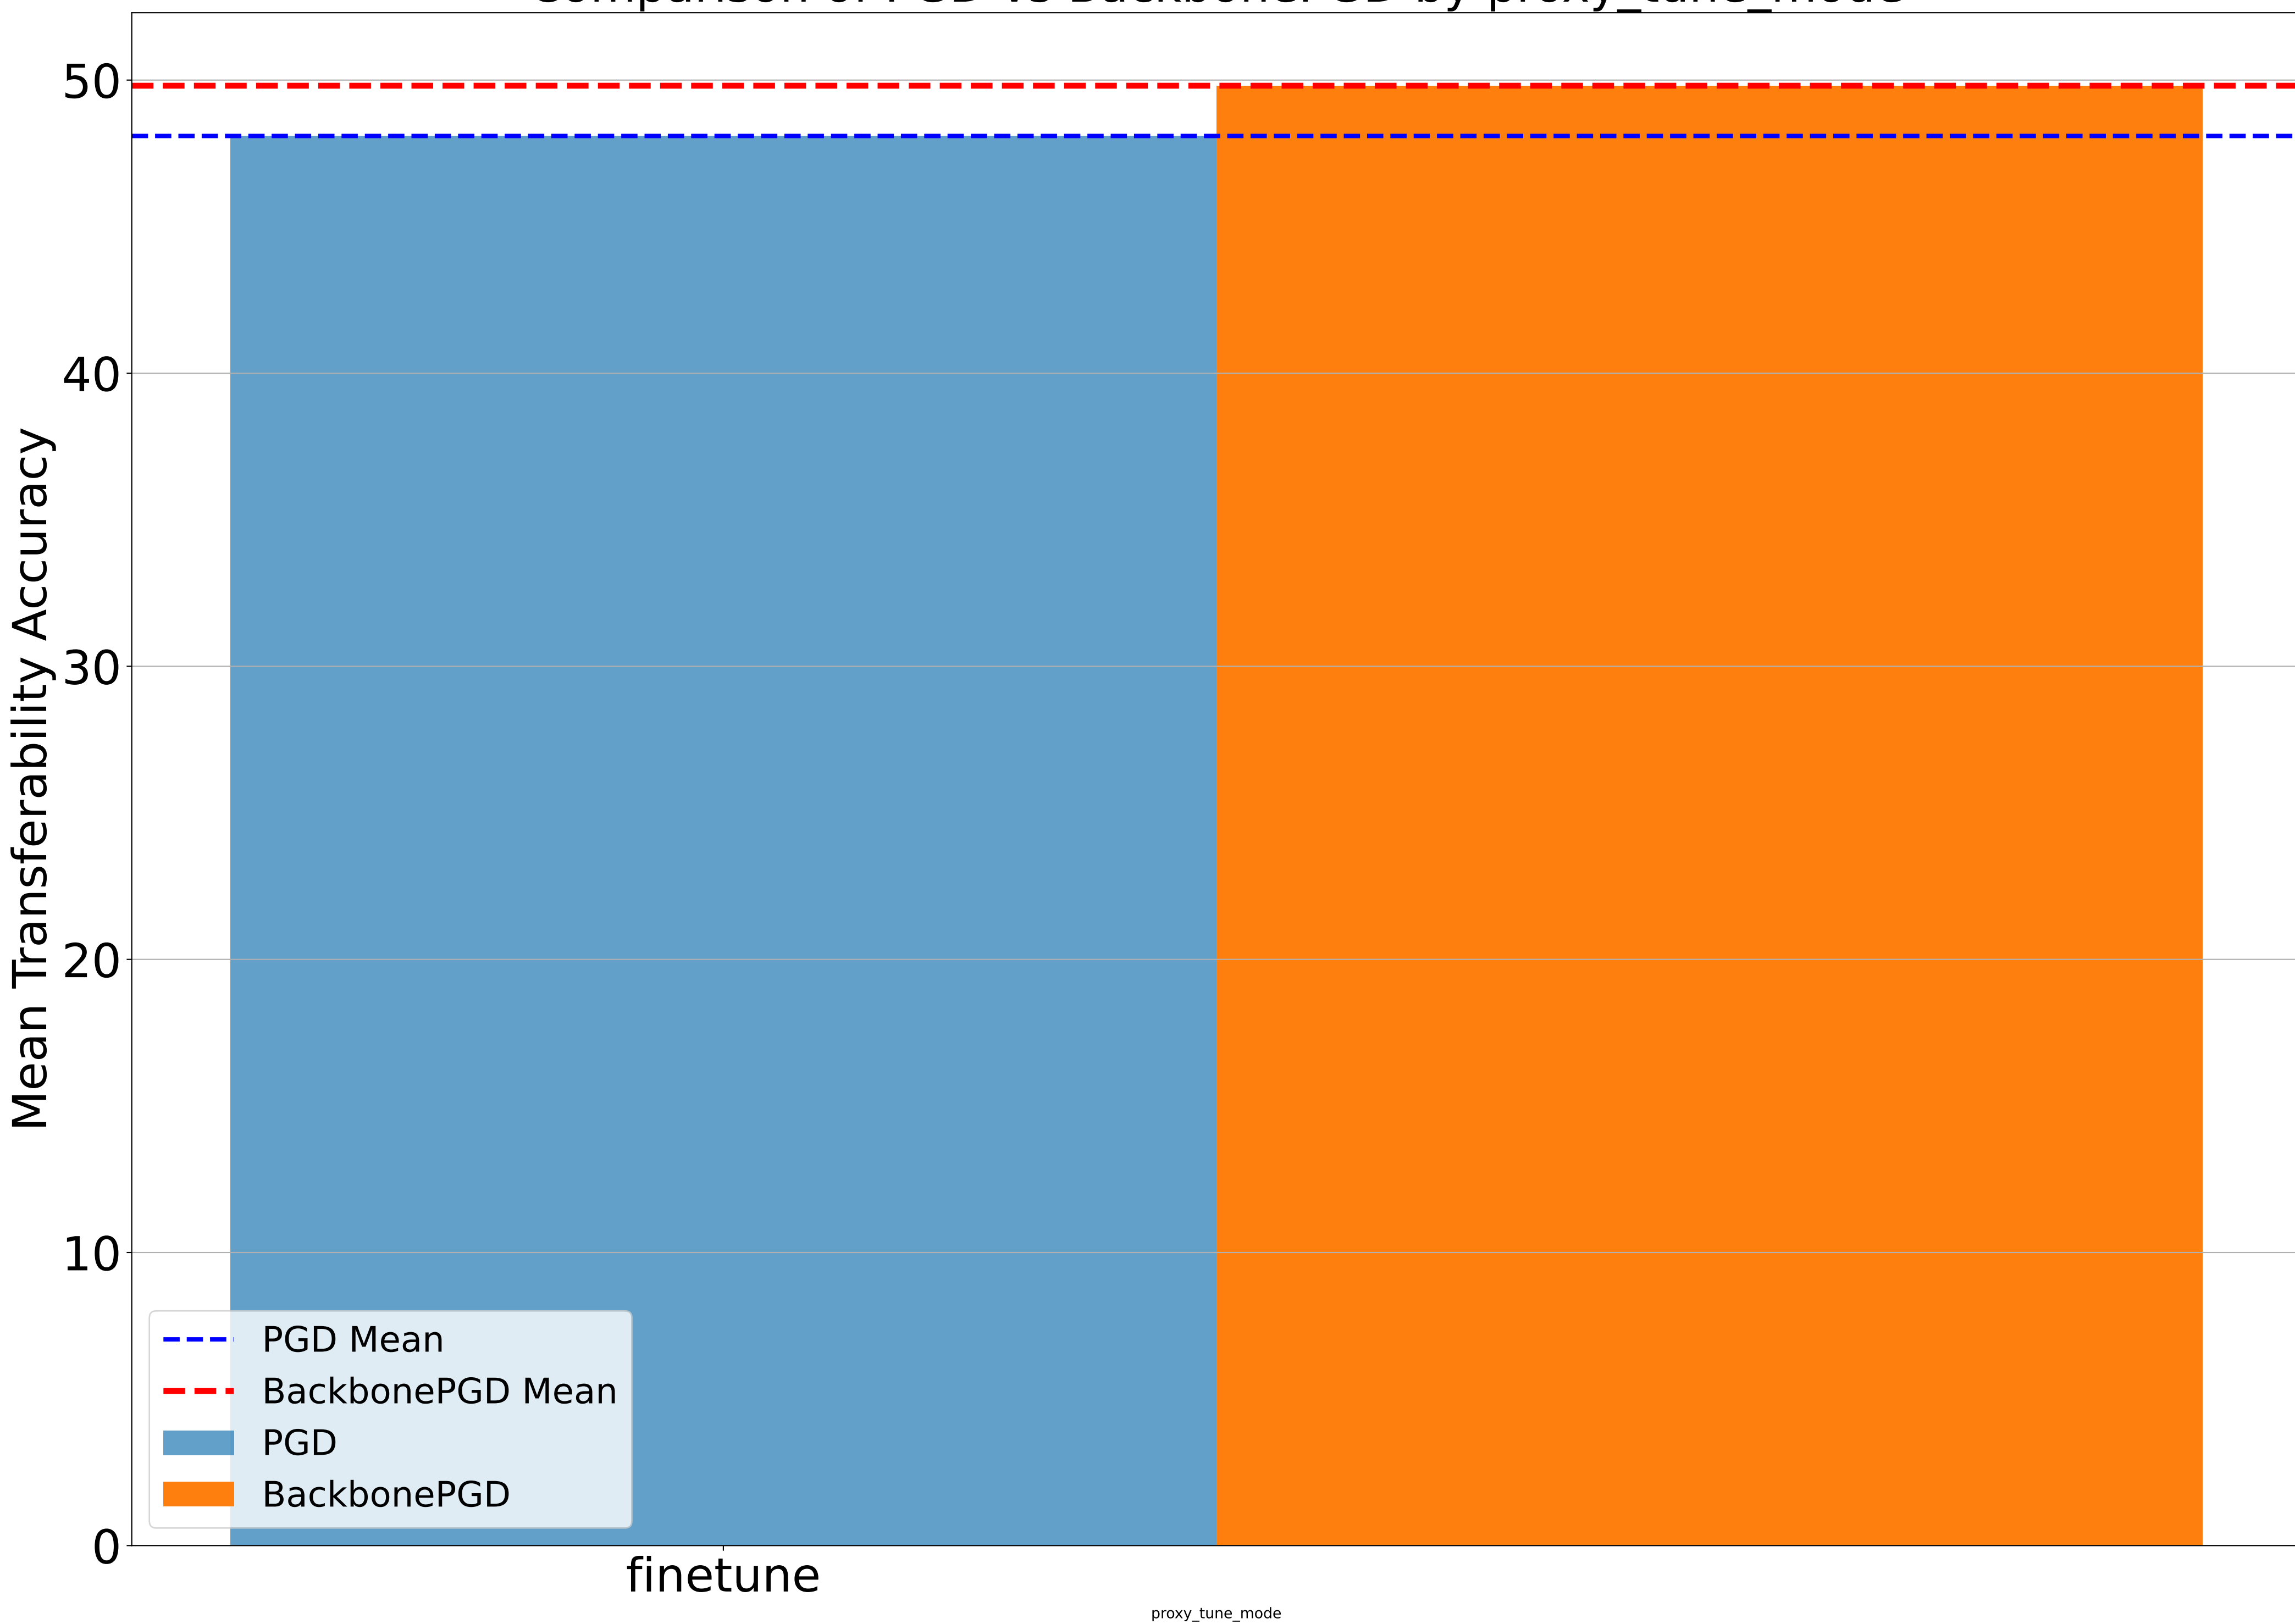

Supplement: supplementary_material [file swav_pgd_vs_backbone_pgd_proxy_tune_mode.pdf › adversarial_for_icml/figures/swav/swav_pgd_vs_backbone_pgd_proxy_tune_mode.pdf]

Comparison of PGD vs BackbonePGD by target\_dataset\_name

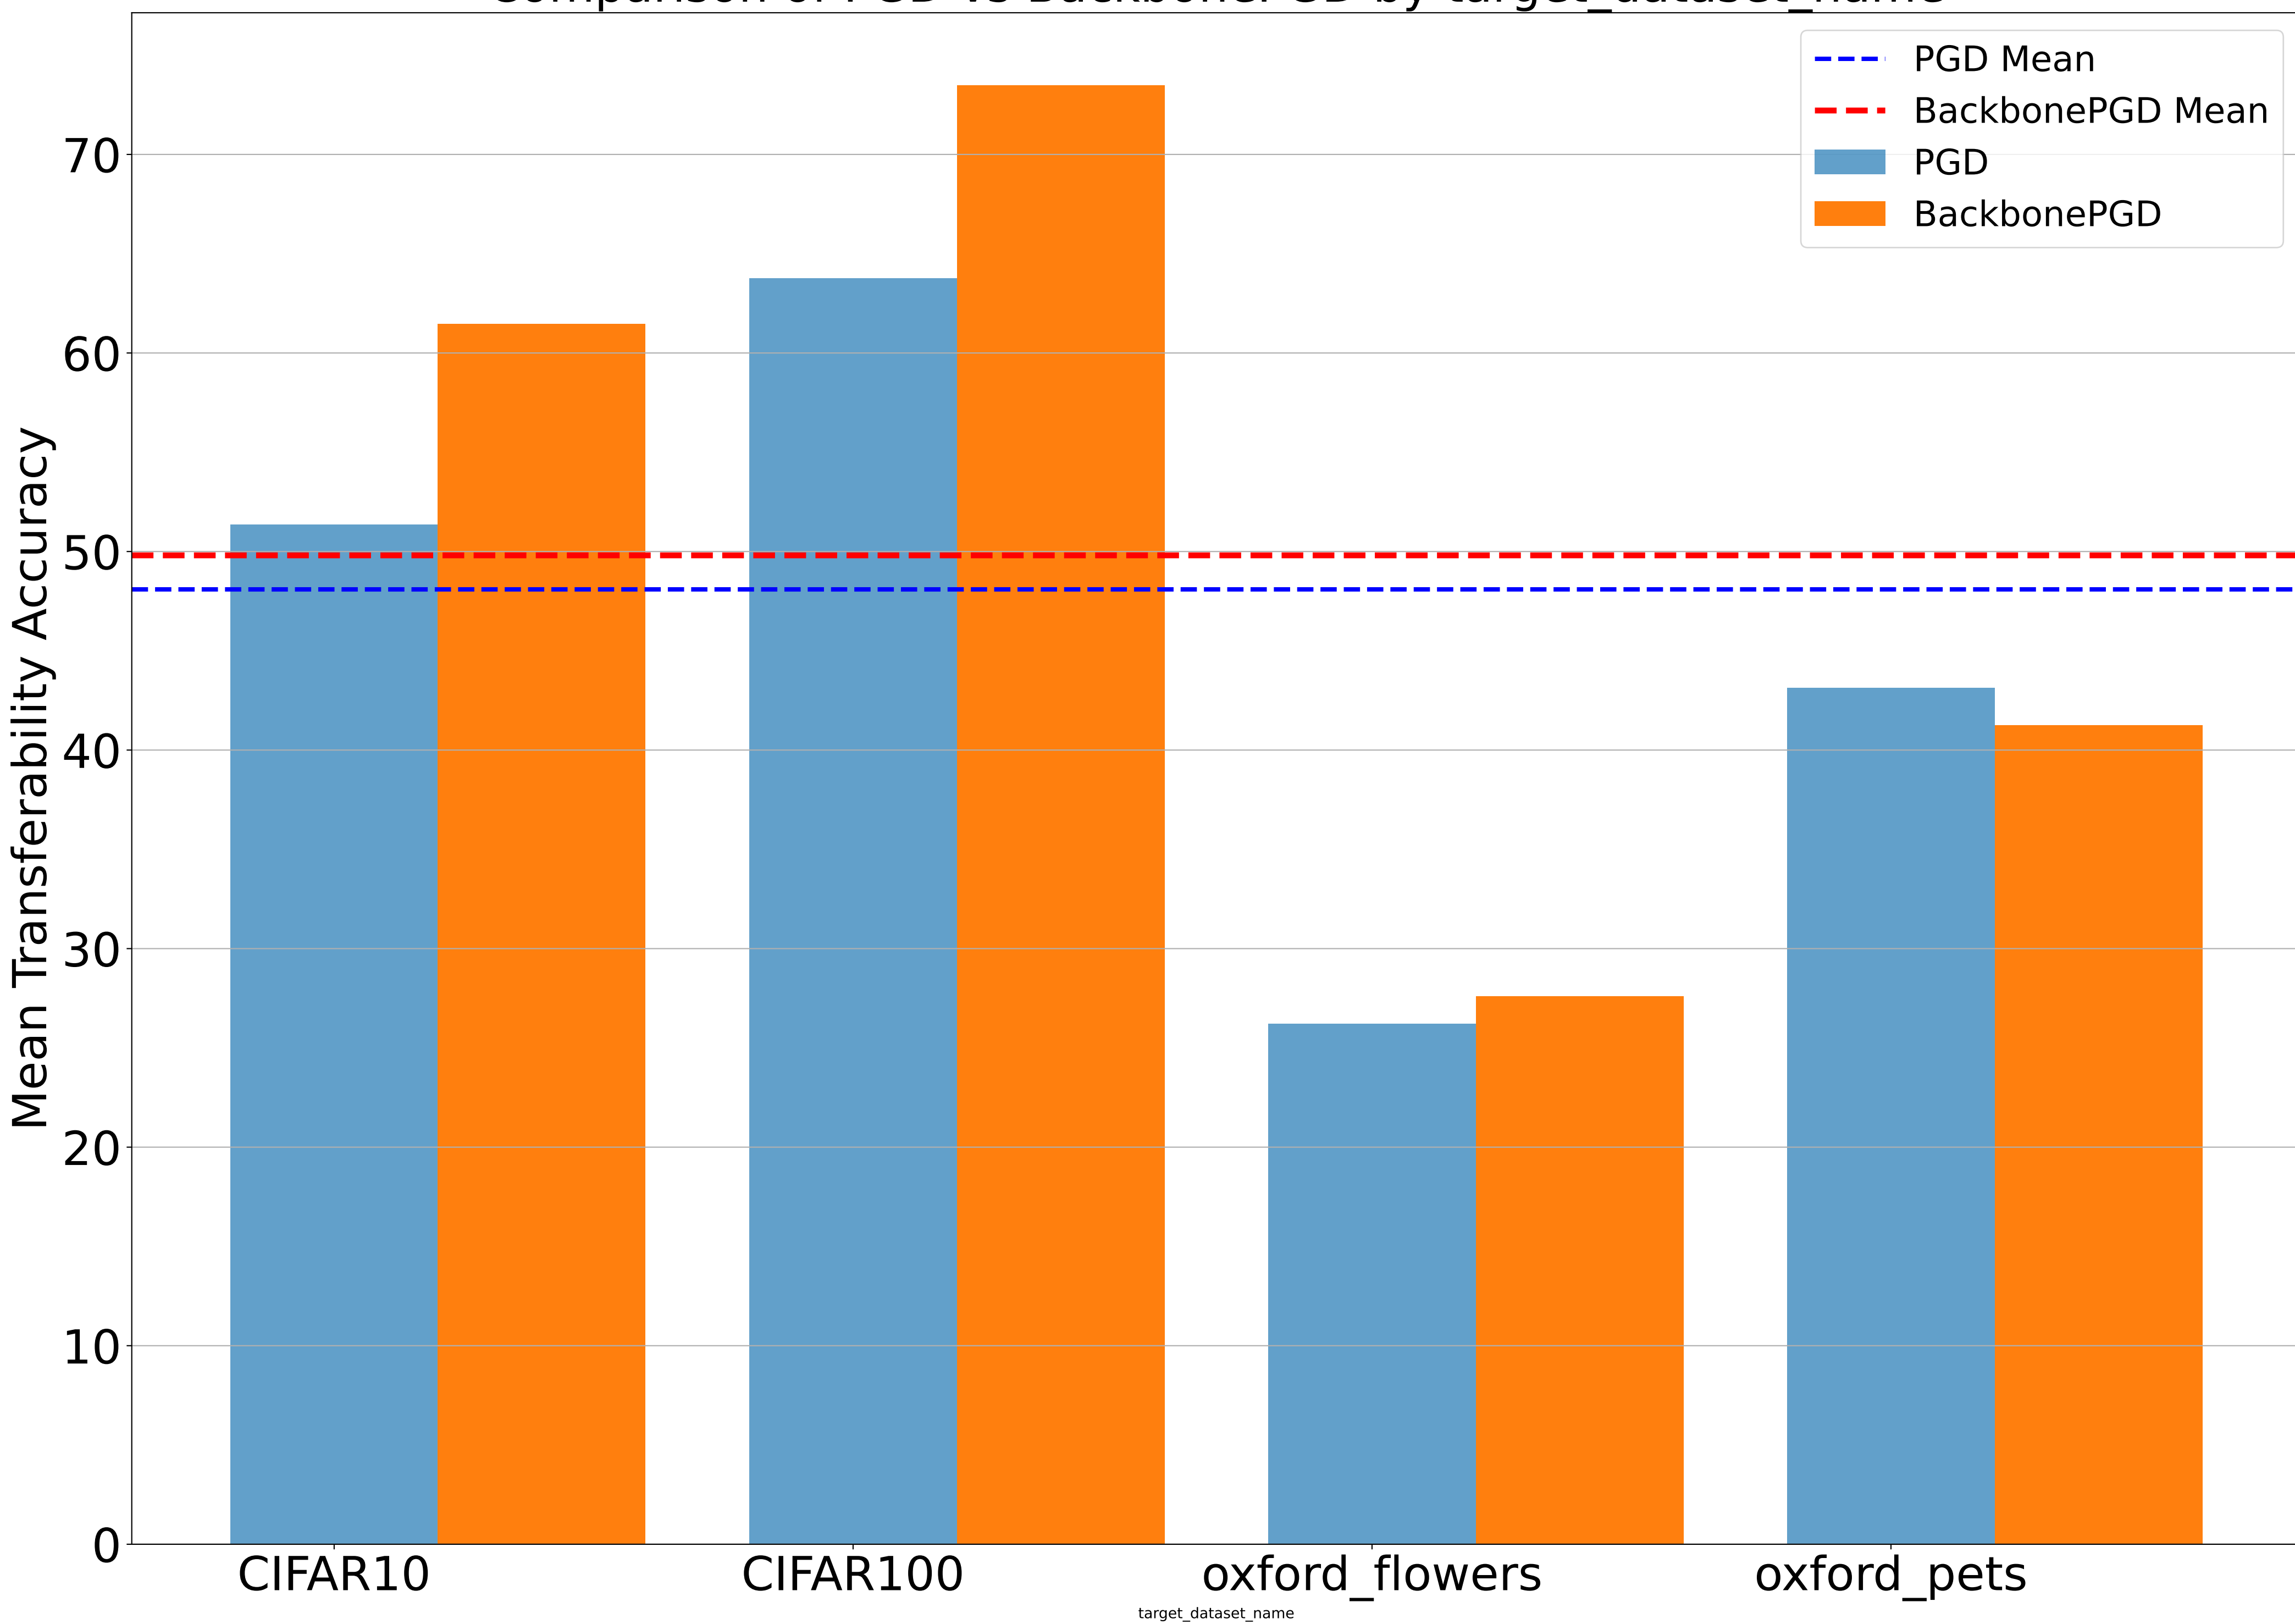

Supplement: supplementary_material [file swav_pgd_vs_backbone_pgd_target_dataset_name.pdf › adversarial_for_icml/figures/swav/swav_pgd_vs_backbone_pgd_target_dataset_name.pdf]

Comparison of PGD vs BackbonePGD by target\_tune\_depth

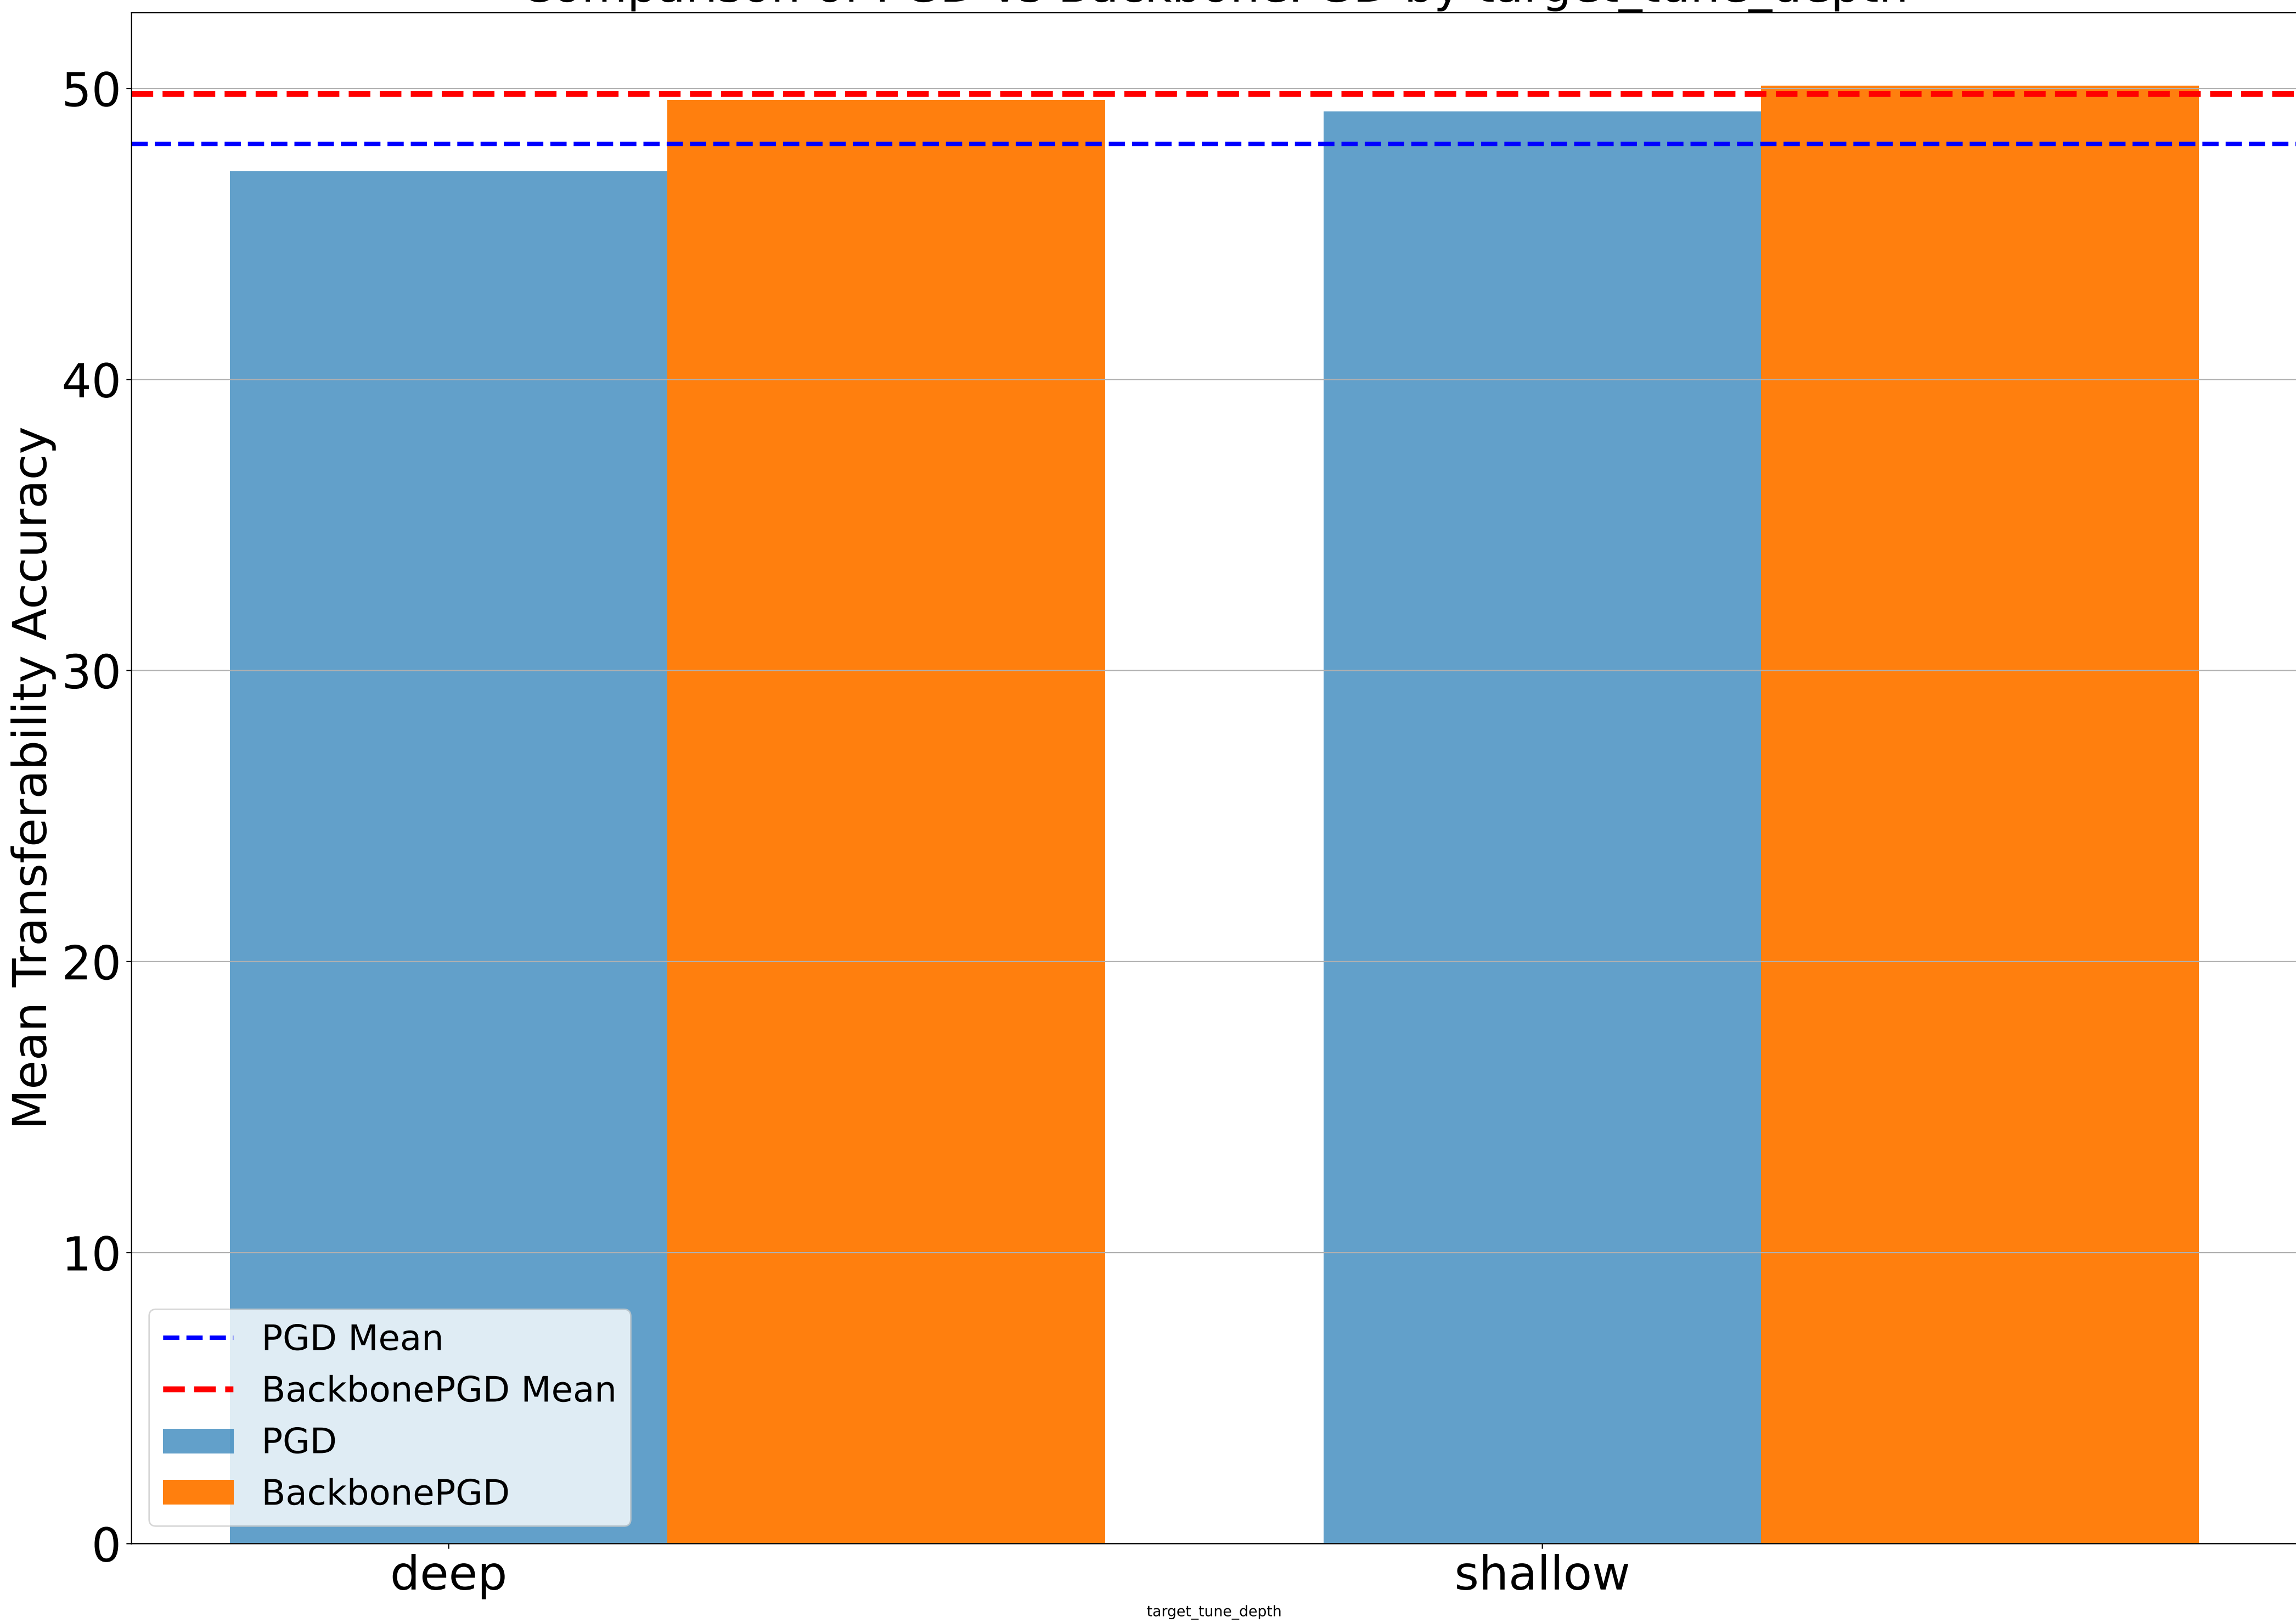

Supplement: supplementary_material [file swav_pgd_vs_backbone_pgd_target_tune_depth.pdf › adversarial_for_icml/figures/swav/swav_pgd_vs_backbone_pgd_target_tune_depth.pdf]

Comparison of PGD vs BackbonePGD by target\_tune\_mode

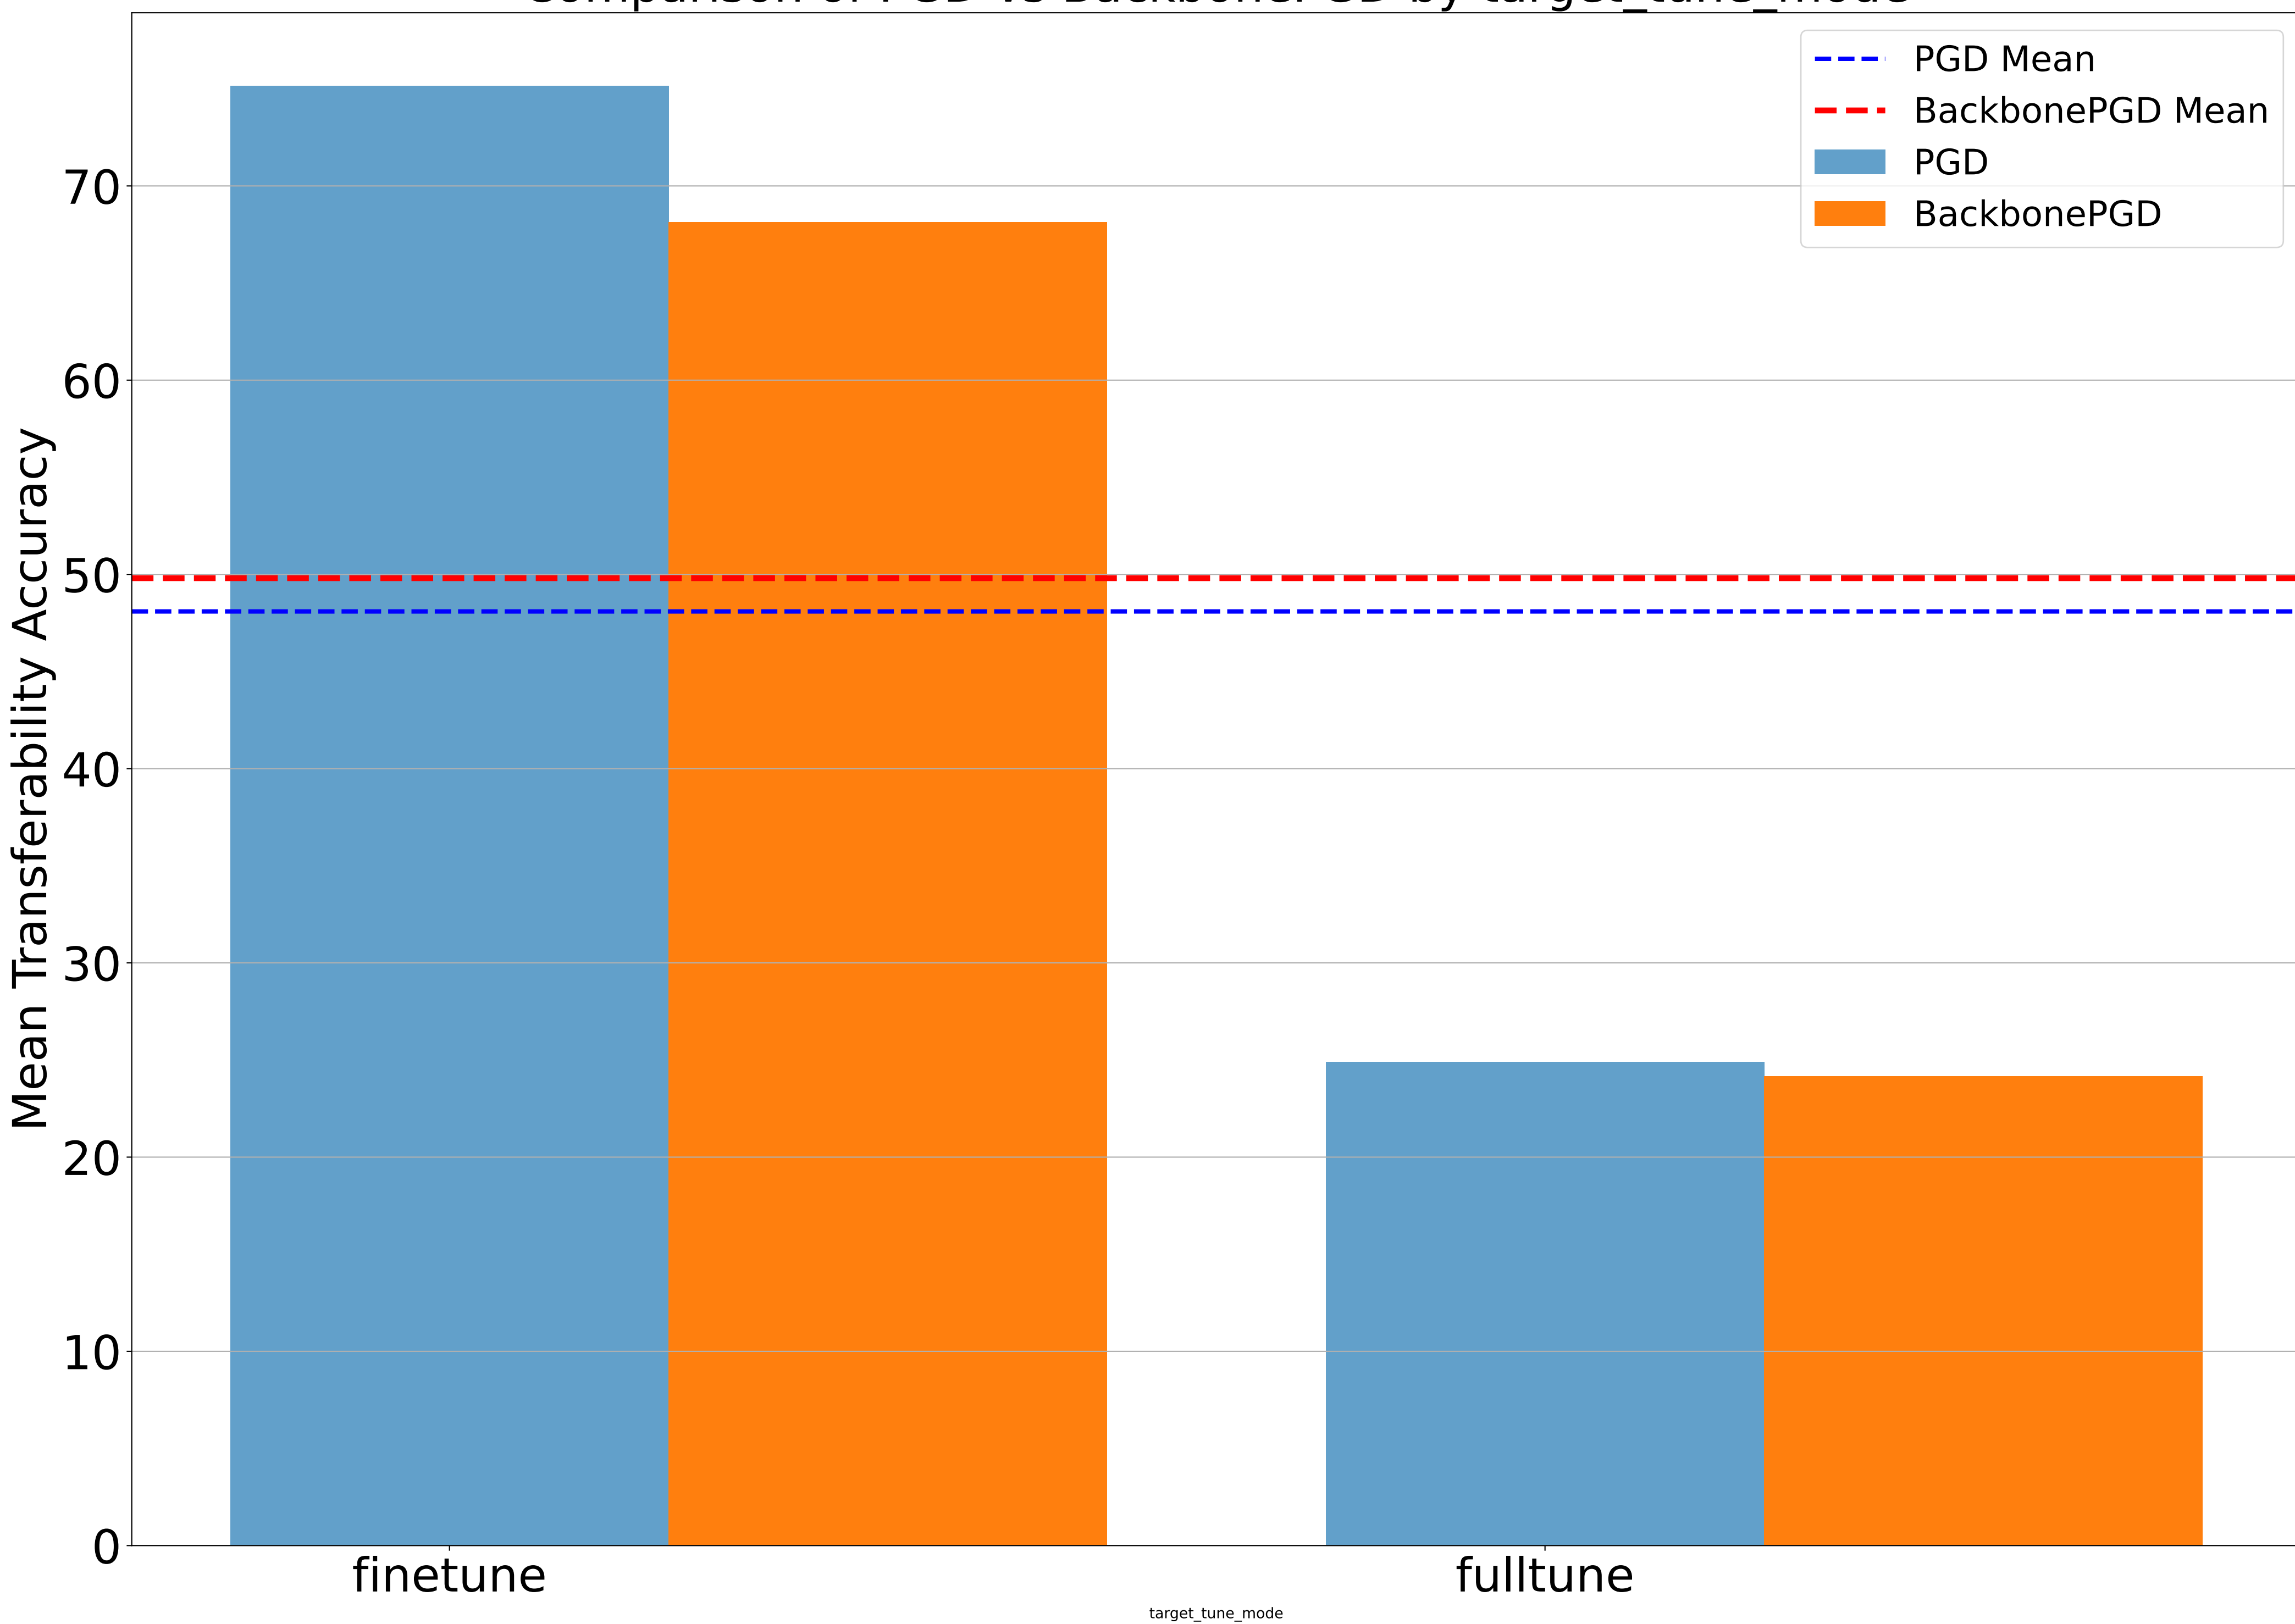

Supplement: supplementary_material [file swav_pgd_vs_backbone_pgd_target_tune_mode.pdf › adversarial_for_icml/figures/swav/swav_pgd_vs_backbone_pgd_target_tune_mode.pdf]

Comparison of PGD vs BackbonePGD by targeted

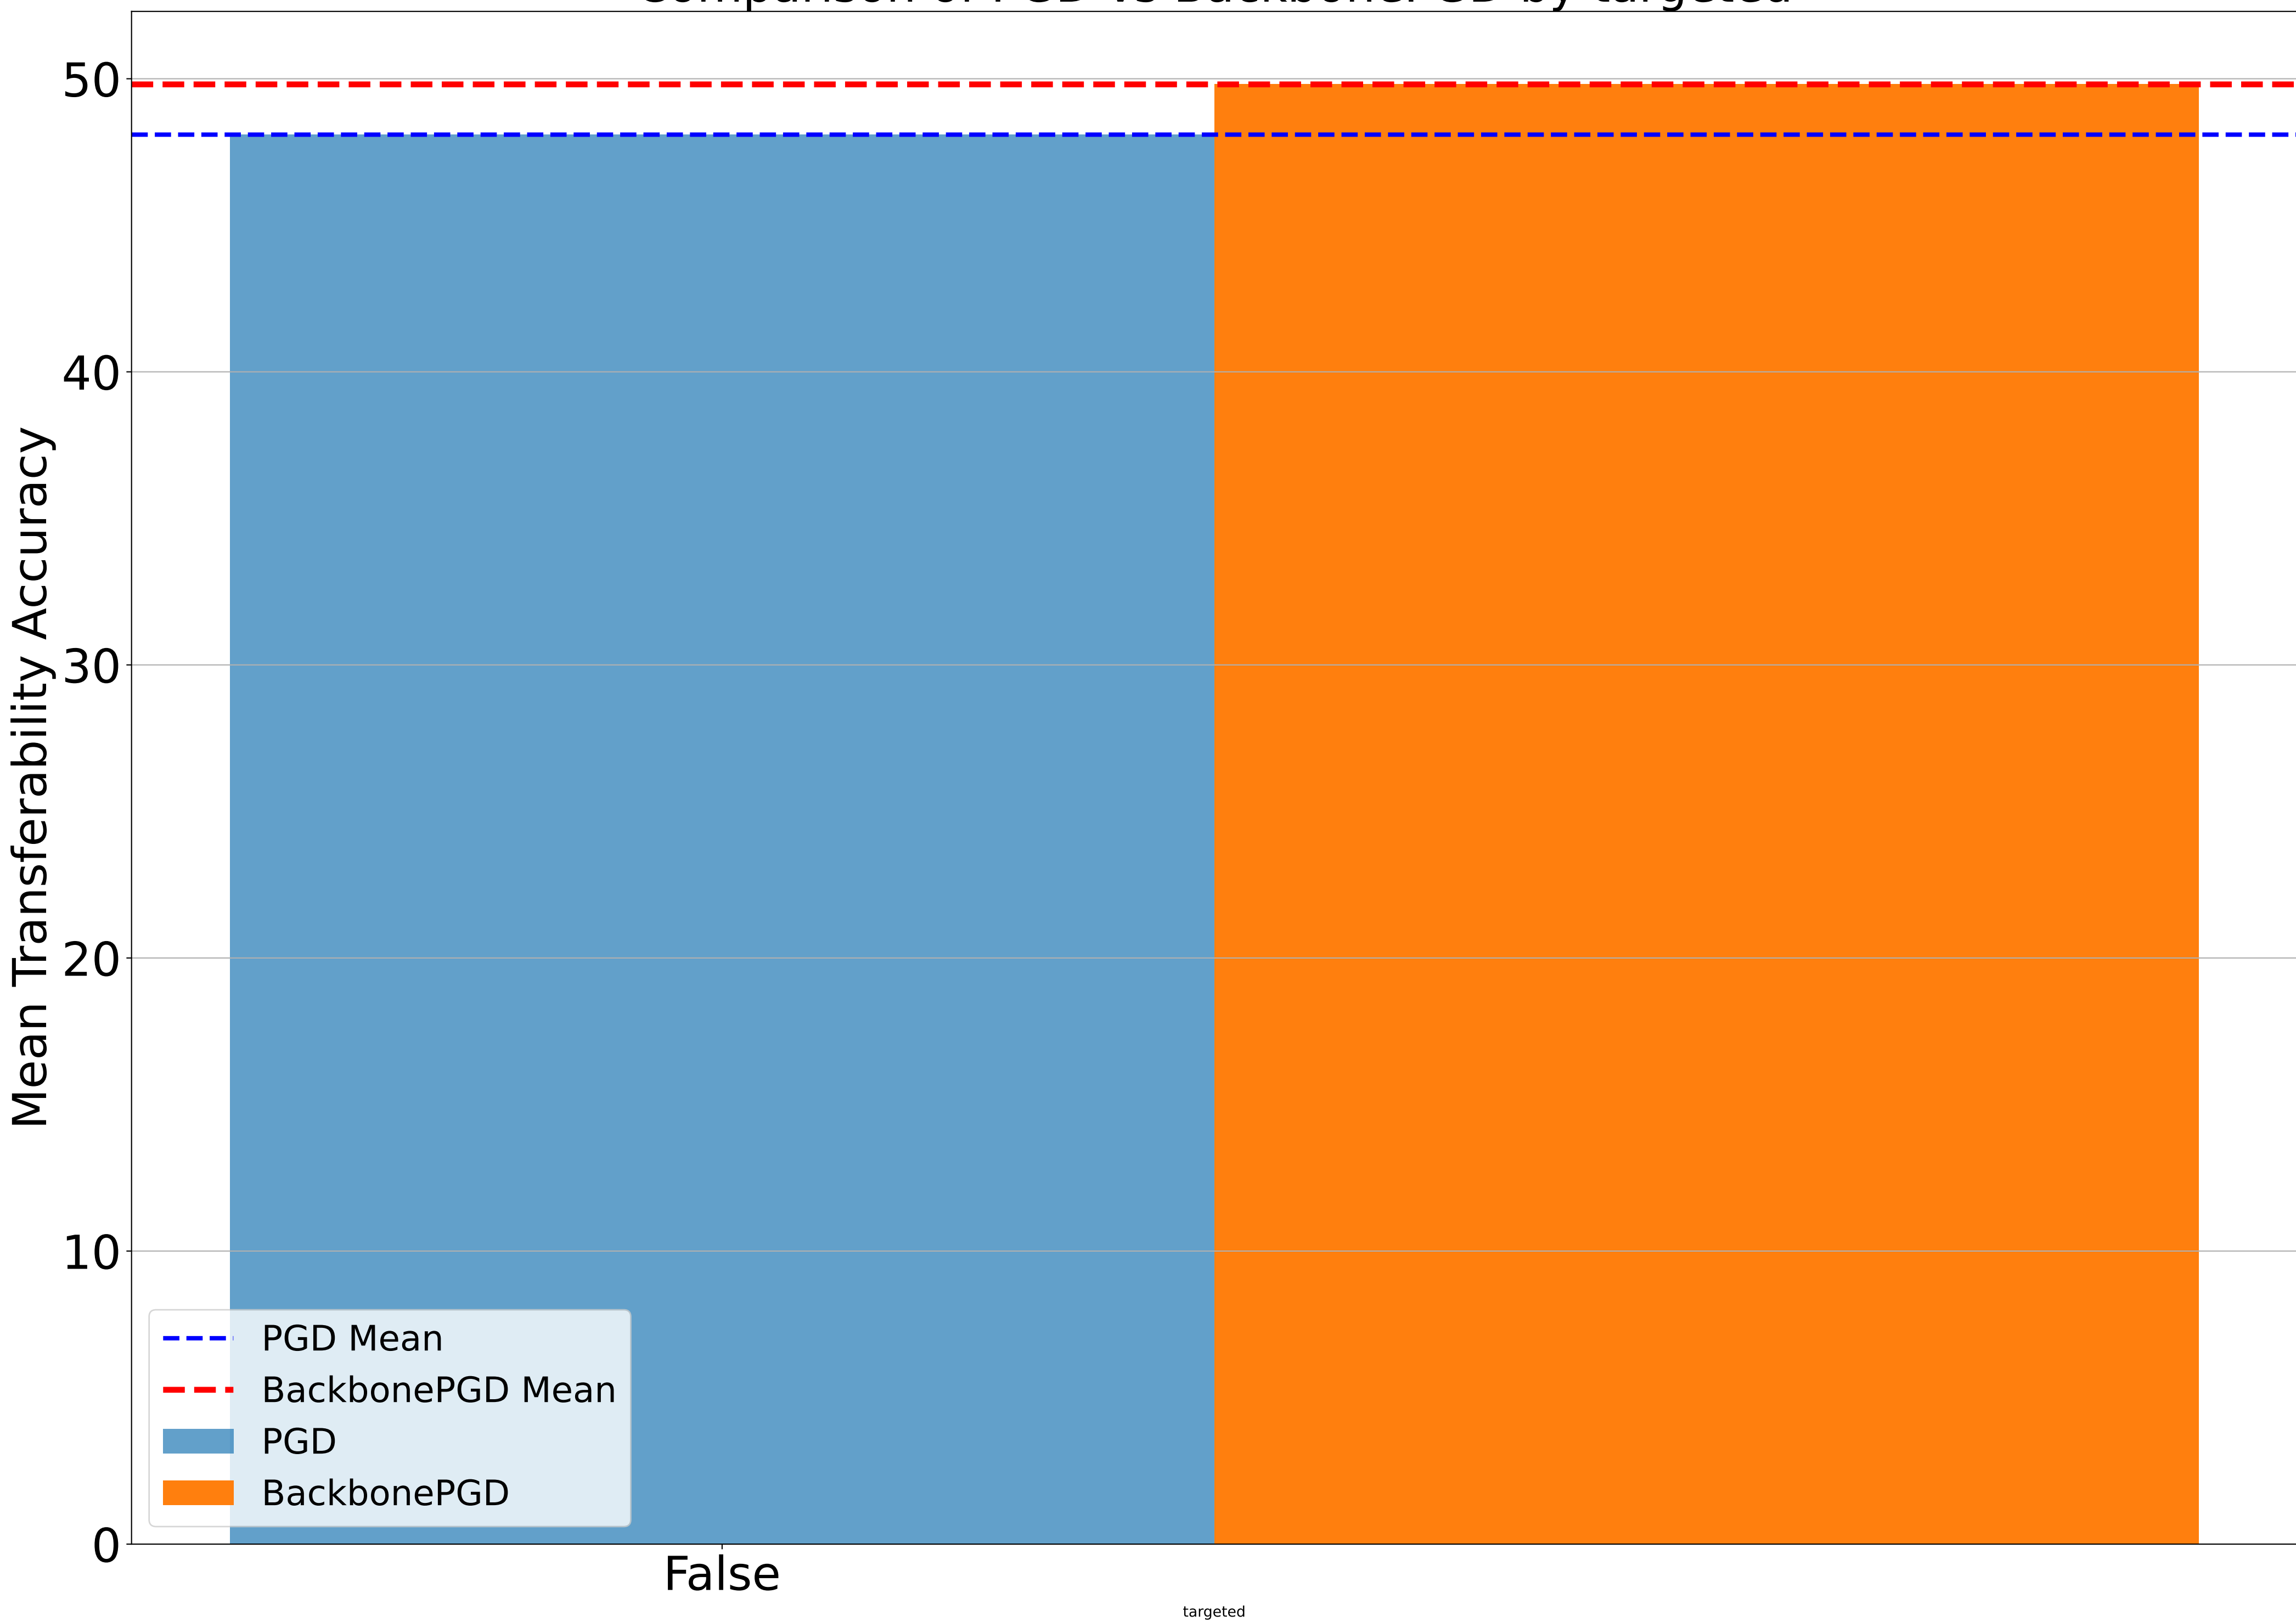

Supplement: supplementary_material [file swav_pgd_vs_backbone_pgd_targeted.pdf › adversarial_for_icml/figures/swav/swav_pgd_vs_backbone_pgd_targeted.pdf]

Comparison of PGD vs BackbonePGD by transferability\_data\_name

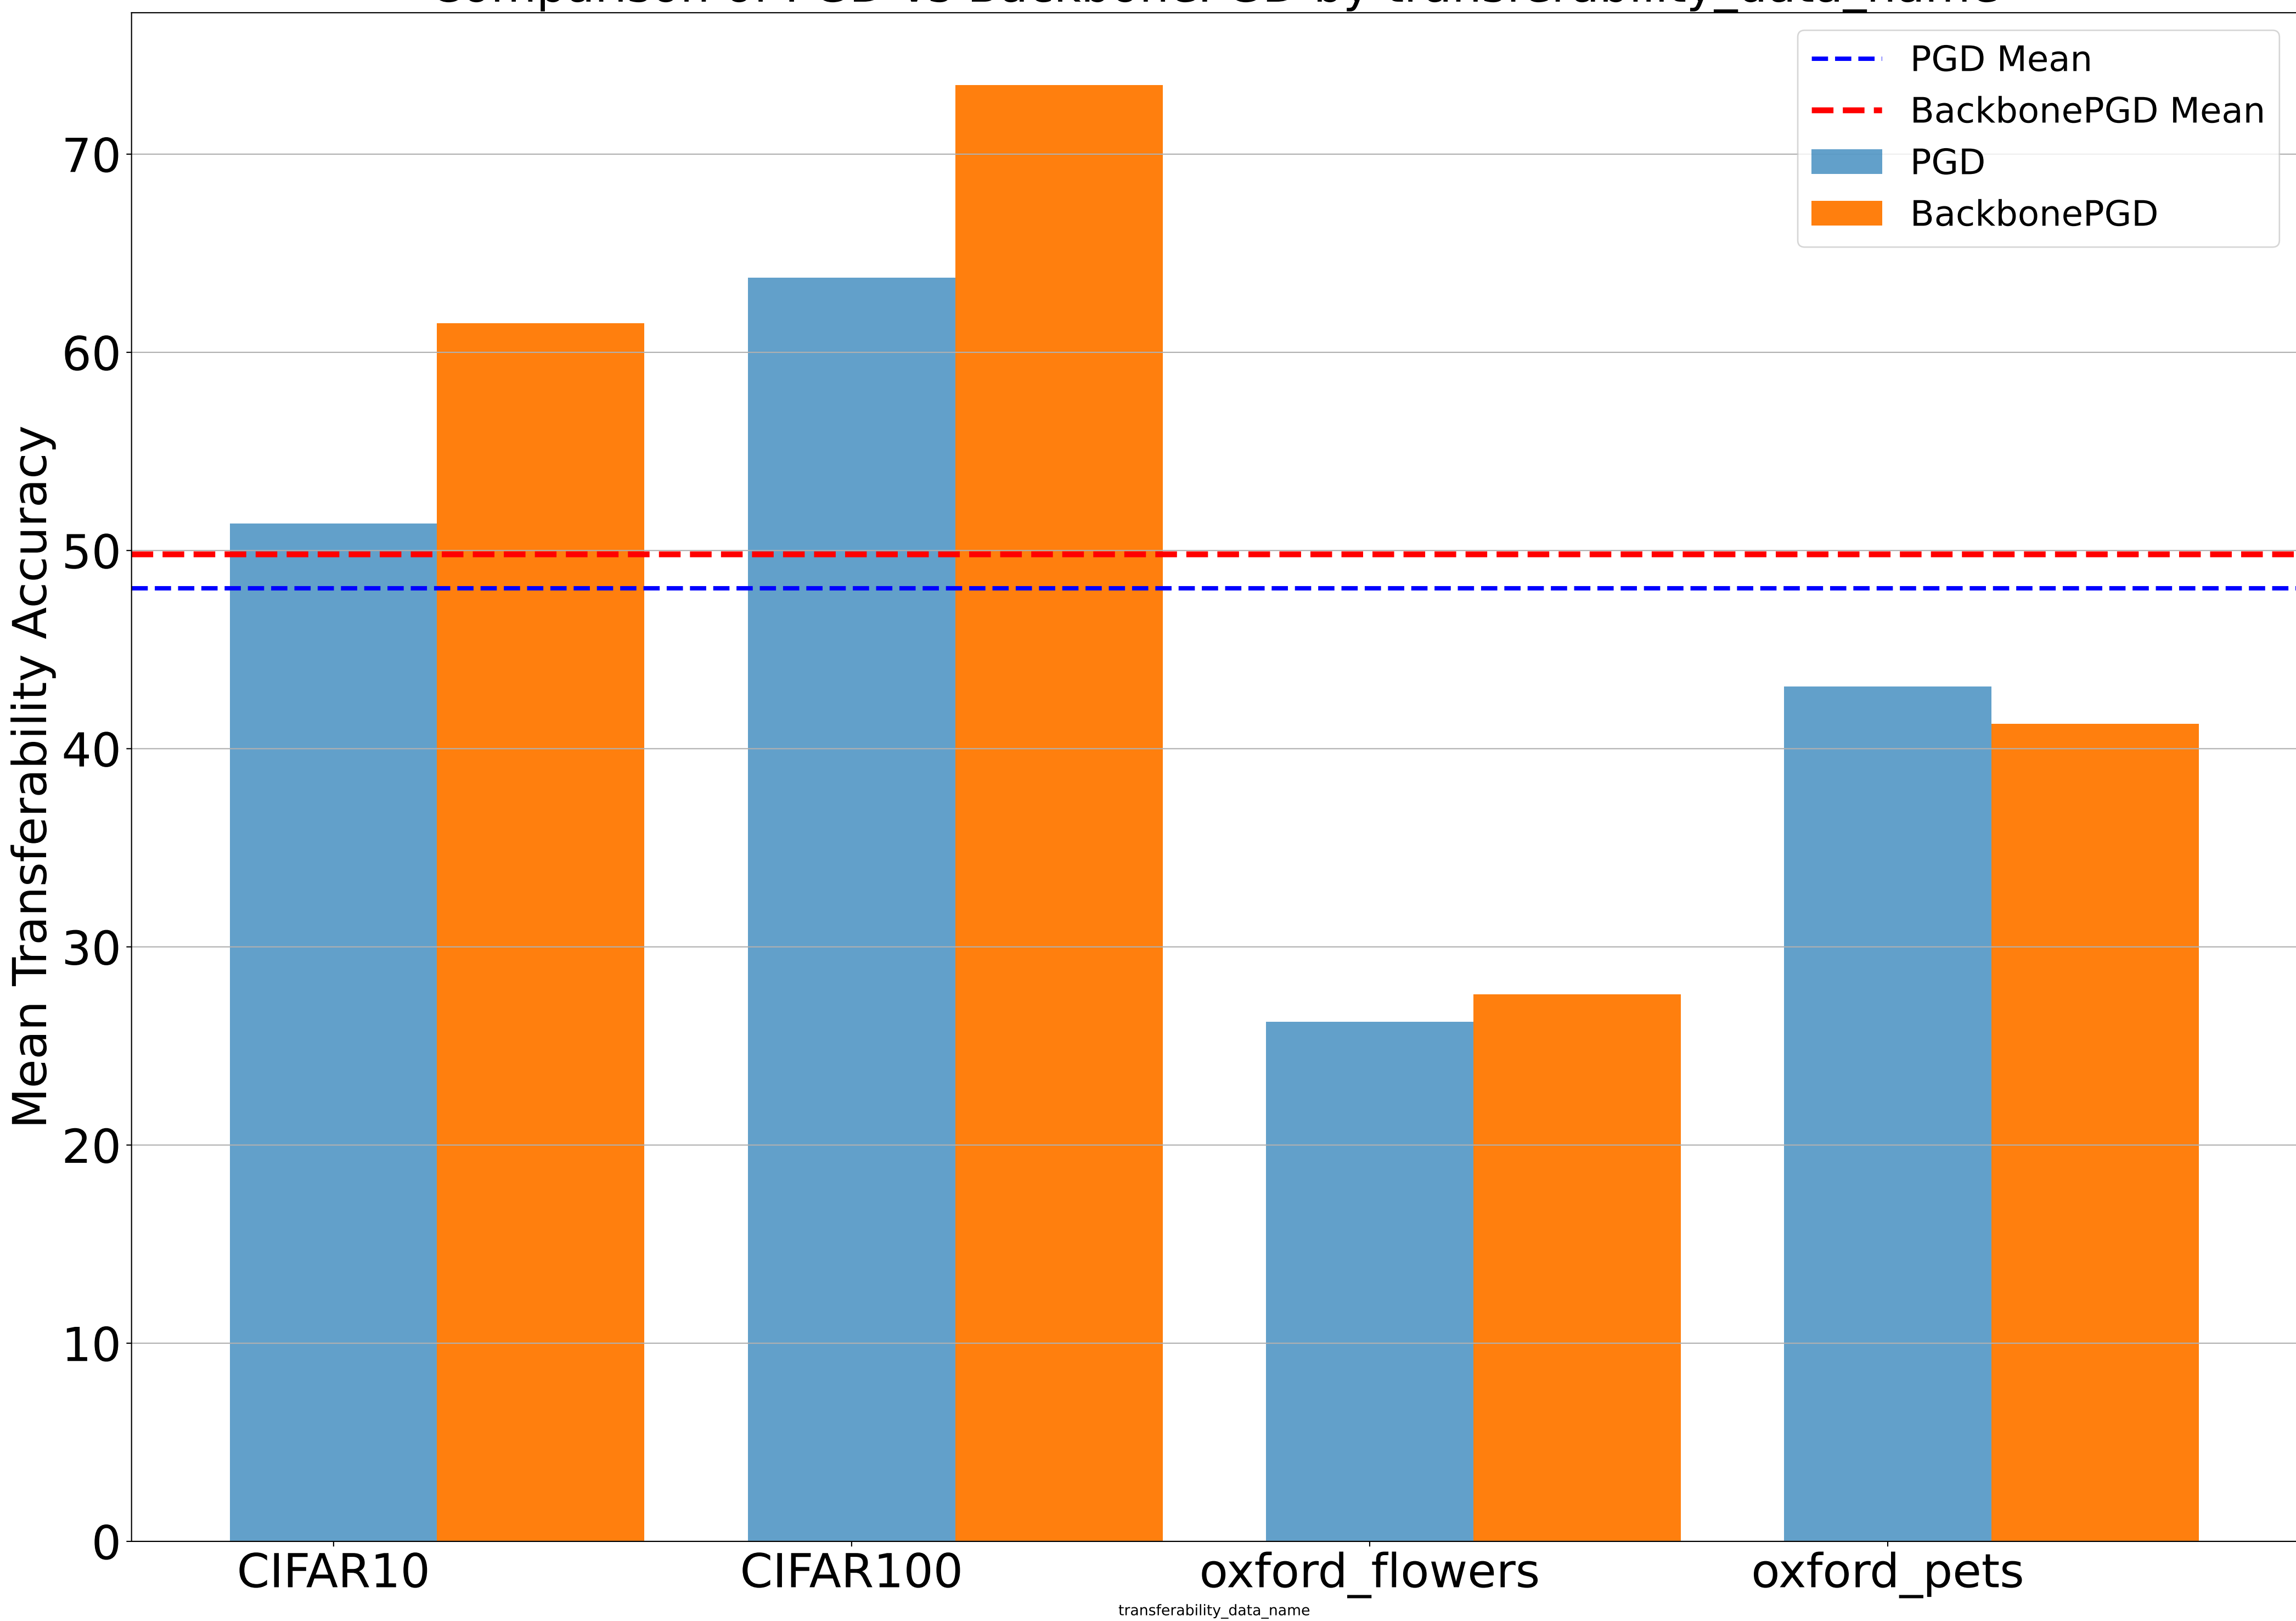

Supplement: supplementary_material [file swav_pgd_vs_backbone_pgd_transferability_data_name.pdf › adversarial_for_icml/figures/swav/swav_pgd_vs_backbone_pgd_transferability_data_name.pdf]

Adversarial Transferability For Different Attacks



Supplement: supplementary_material [file transferability_attack_type_not_longerPGD.pdf › adversarial_for_icml/figures/transferability_attack_type_not_longerPGD.pdf]

Adversarial Transferability For Different Attacks



Supplement: supplementary_material [file transferability_attack_type_with_longerPGD.pdf › adversarial_for_icml/figures/transferability_attack_type_with_longerPGD.pdf]

Adversarial Transferability For Different Datasets



Supplement: supplementary_material [file transferability_datasets_not_longerPGD.pdf › adversarial_for_icml/figures/transferability_datasets_not_longerPGD.pdf]

Adversarial Transferability For Different Fine-Tuning Techniques



Supplement: supplementary_material [file transferability_finetuning_techniques_not_longerPGD.pdf › adversarial_for_icml/figures/transferability_finetuning_techniques_not_longerPGD.pdf]

Adversarial Transferability For Different Fine-Tuning Techniques

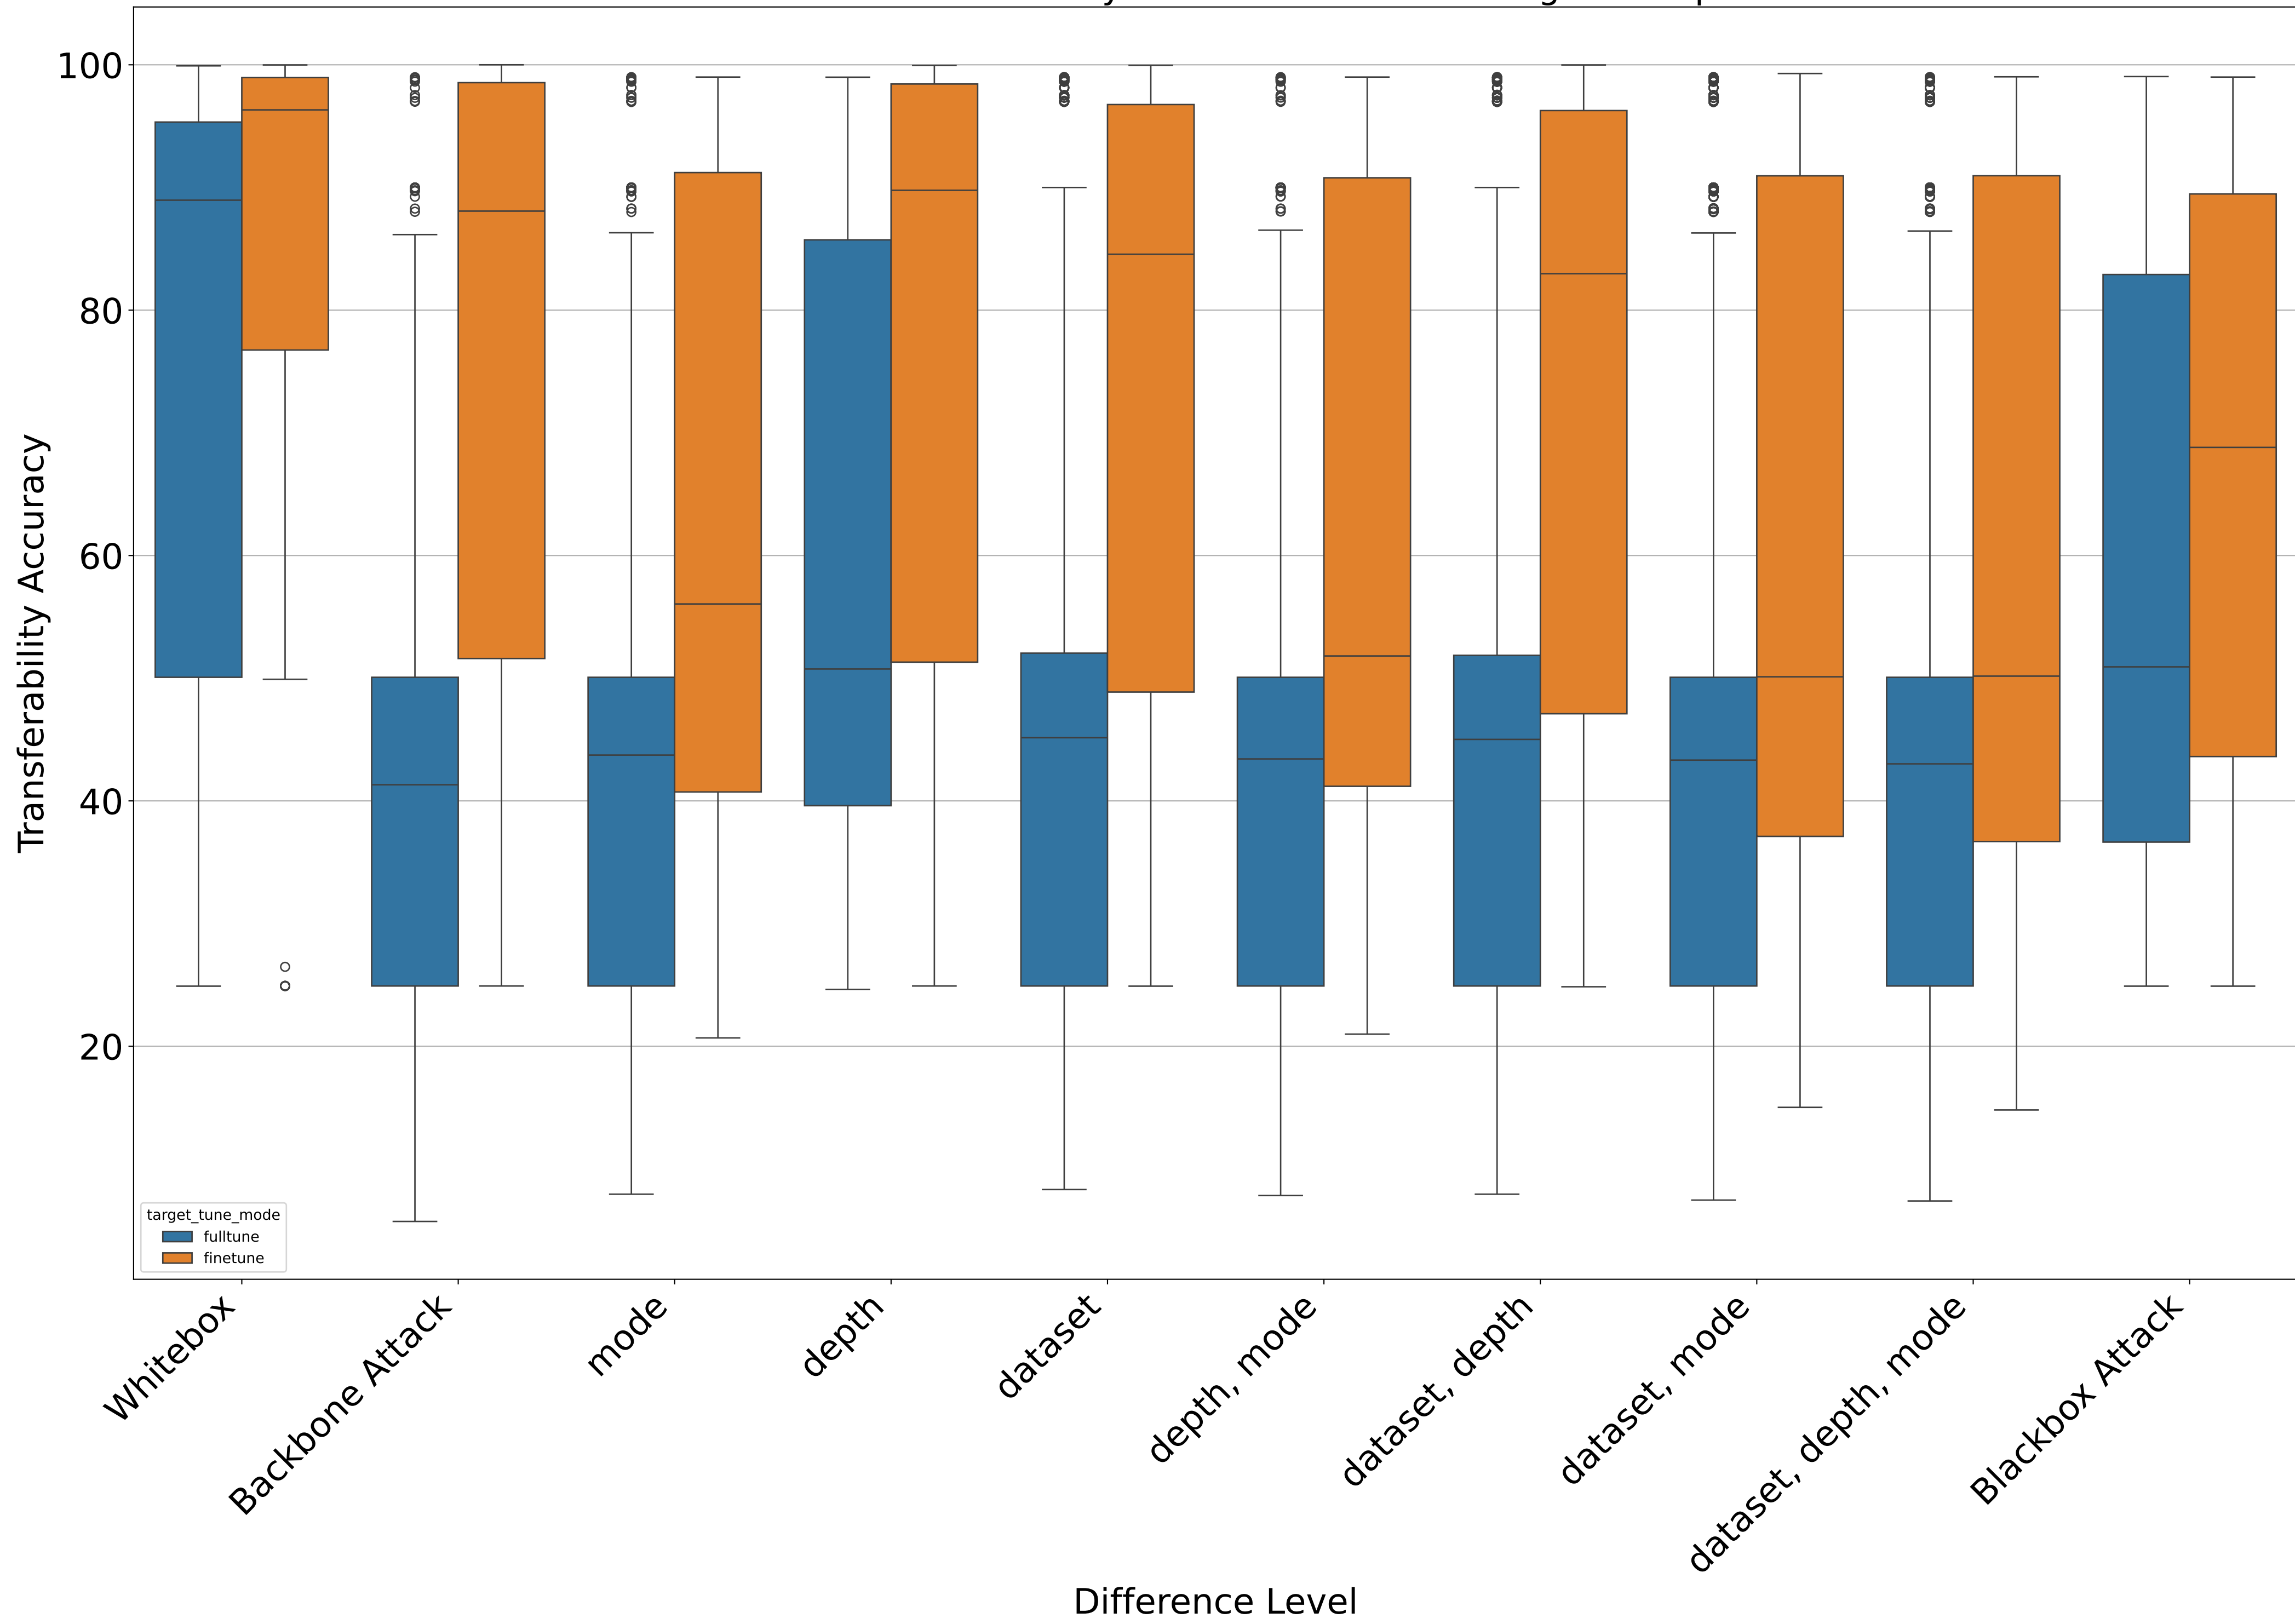

Supplement: supplementary_material [file transferability_finetuning_techniques_with_longerPGD.pdf › adversarial_for_icml/figures/transferability_finetuning_techniques_with_longerPGD.pdf]

Adversarial Transferability For Different Fine-Tuning Types



Supplement: supplementary_material [file transferability_finetuning_types_not_longerPGD.pdf › adversarial_for_icml/figures/transferability_finetuning_types_not_longerPGD.pdf]

Box plot for converted\_alexnet\_colorization\_in1k\_pretext and attack\_name

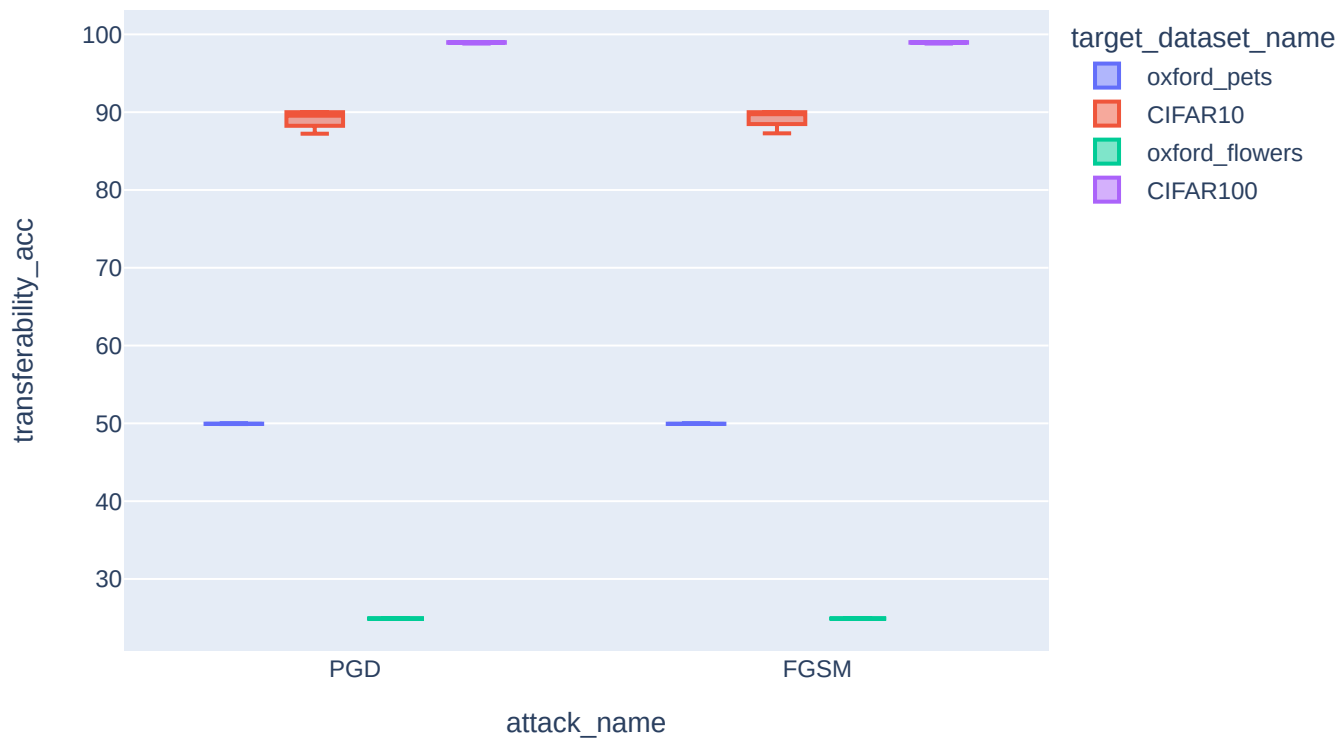

Supplement: supplementary_material [file transferability_box_converted_alexnet_colorization_in1k_pretext_attack_name.pdf › adversarial_for_icml/figures/transferability_per_model_family/transferability_box_converted_alexnet_colorization_in1k_pretext_attack_name.pdf]

Box plot for converted\_alexnet\_colorization\_in1k\_pretext and proxy\_tune\_depth

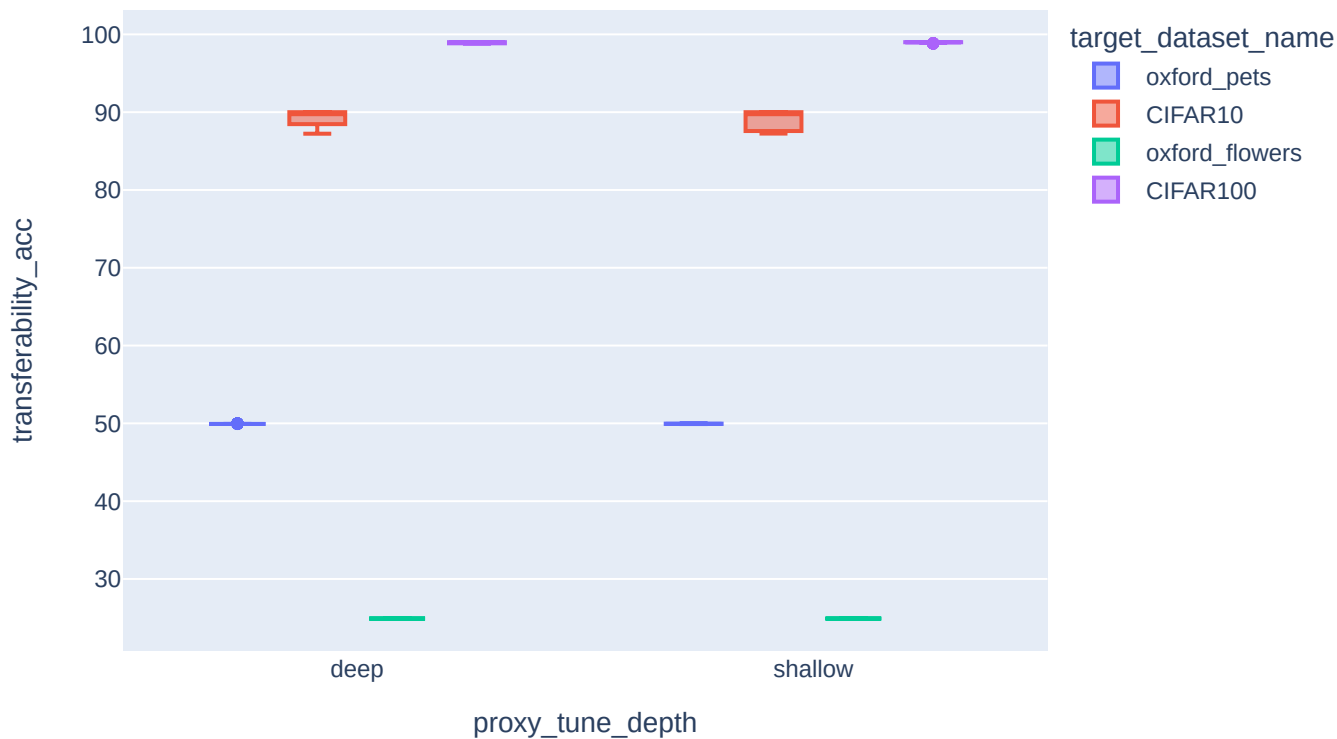

Supplement: supplementary_material [file transferability_box_converted_alexnet_colorization_in1k_pretext_proxy_tune_depth.pdf › adversarial_for_icml/figures/transferability_per_model_family/transferability_box_converted_alexnet_colorization_in1k_pretext_proxy_tune_depth.pdf]

Box plot for converted\_alexnet\_colorization\_in1k\_pretext and proxy\_tune\_mode

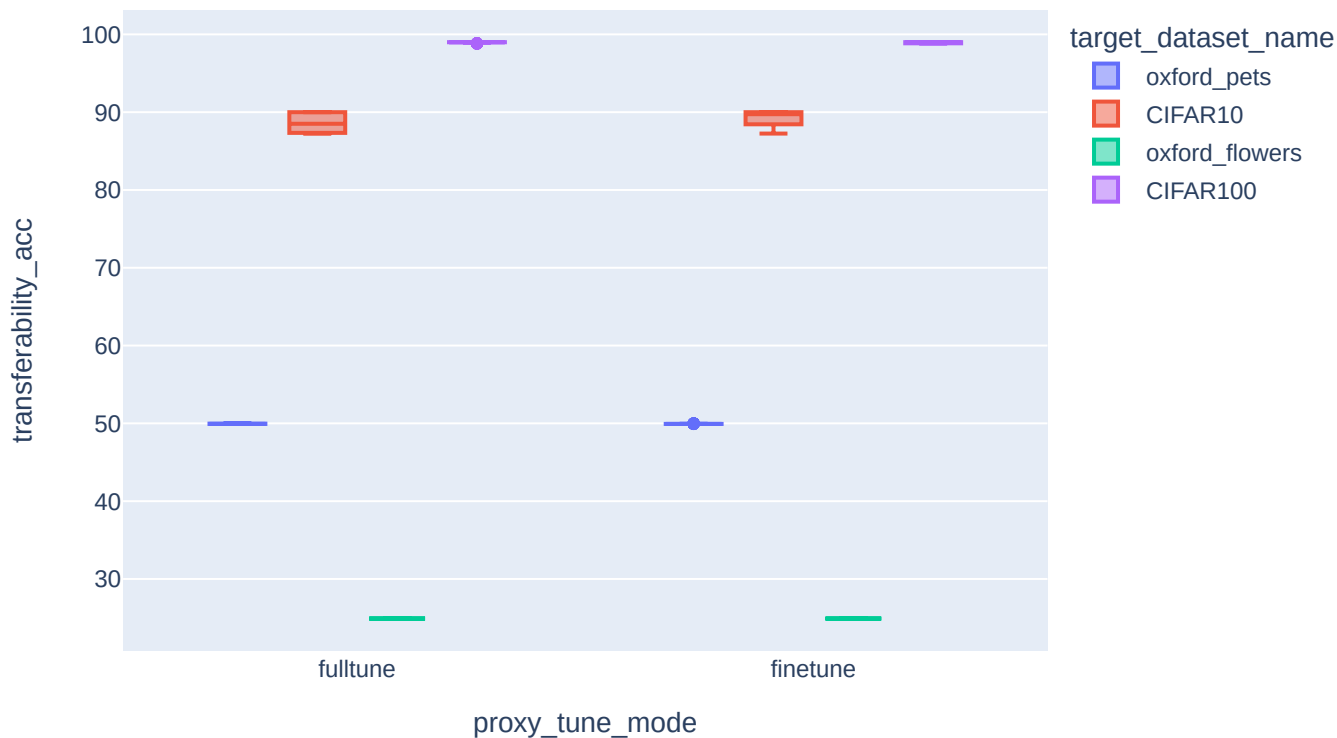

Supplement: supplementary_material [file transferability_box_converted_alexnet_colorization_in1k_pretext_proxy_tune_mode.pdf › adversarial_for_icml/figures/transferability_per_model_family/transferability_box_converted_alexnet_colorization_in1k_pretext_proxy_tune_mode.pdf]

Box plot for converted\_alexnet\_colorization\_in1k\_pretext and targeted

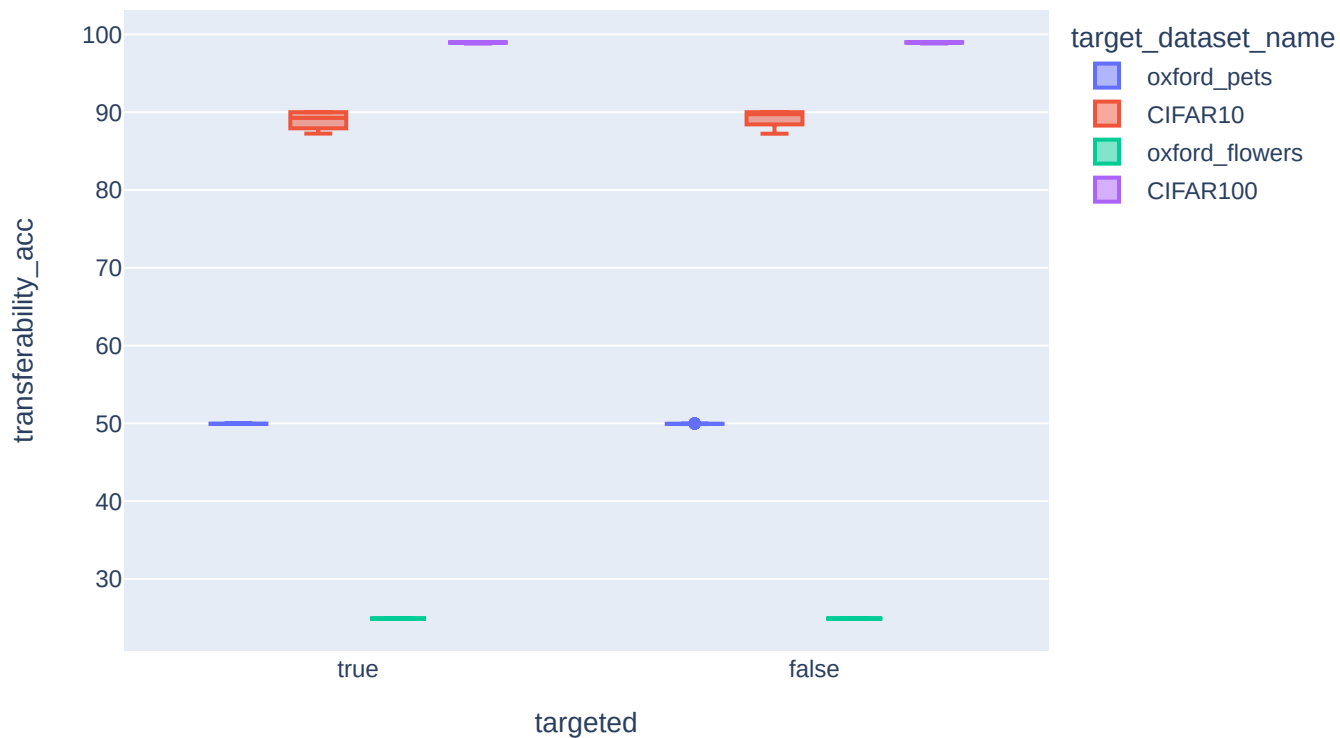

Supplement: supplementary_material [file transferability_box_converted_alexnet_colorization_in1k_pretext_targeted.pdf › adversarial_for_icml/figures/transferability_per_model_family/transferability_box_converted_alexnet_colorization_in1k_pretext_targeted.pdf]

Box plot for converted\_alexnet\_colorization\_in22k\_pretext and attack\_name

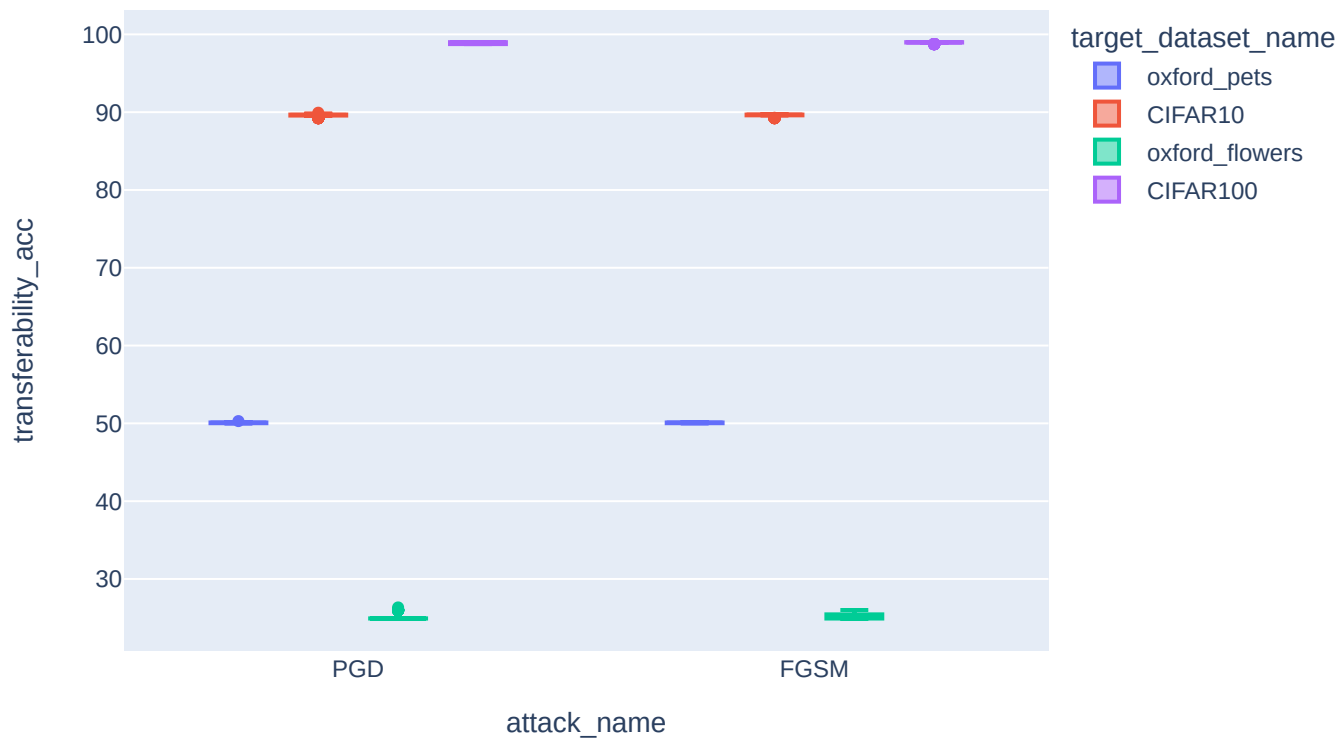

Supplement: supplementary_material [file transferability_box_converted_alexnet_colorization_in22k_pretext_attack_name.pdf › adversarial_for_icml/figures/transferability_per_model_family/transferability_box_converted_alexnet_colorization_in22k_pretext_attack_name.pdf]

Box plot for converted\_alexnet\_colorization\_in22k\_pretext and proxy\_tune\_depth

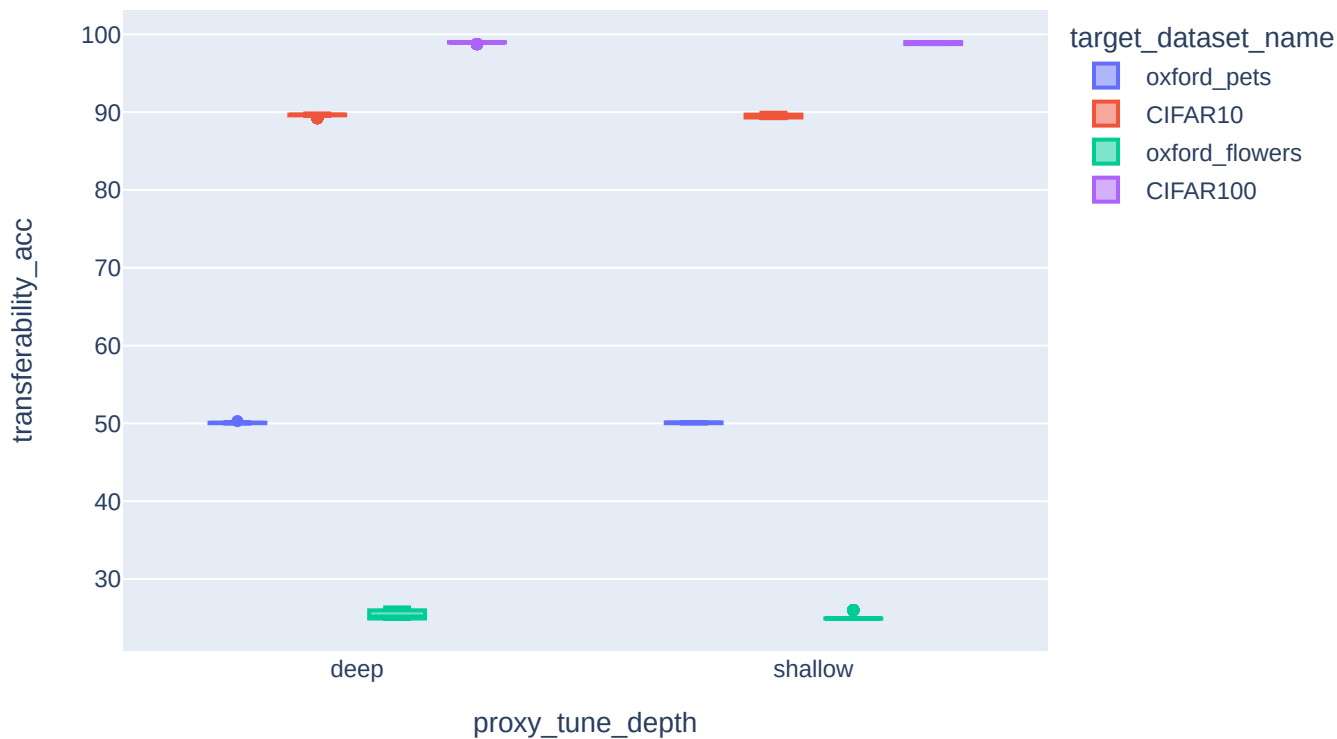

Supplement: supplementary_material [file transferability_box_converted_alexnet_colorization_in22k_pretext_proxy_tune_depth.pdf › adversarial_for_icml/figures/transferability_per_model_family/transferability_box_converted_alexnet_colorization_in22k_pretext_proxy_tune_depth.pdf]

Box plot for converted\_alexnet\_colorization\_in22k\_pretext and proxy\_tune\_mode

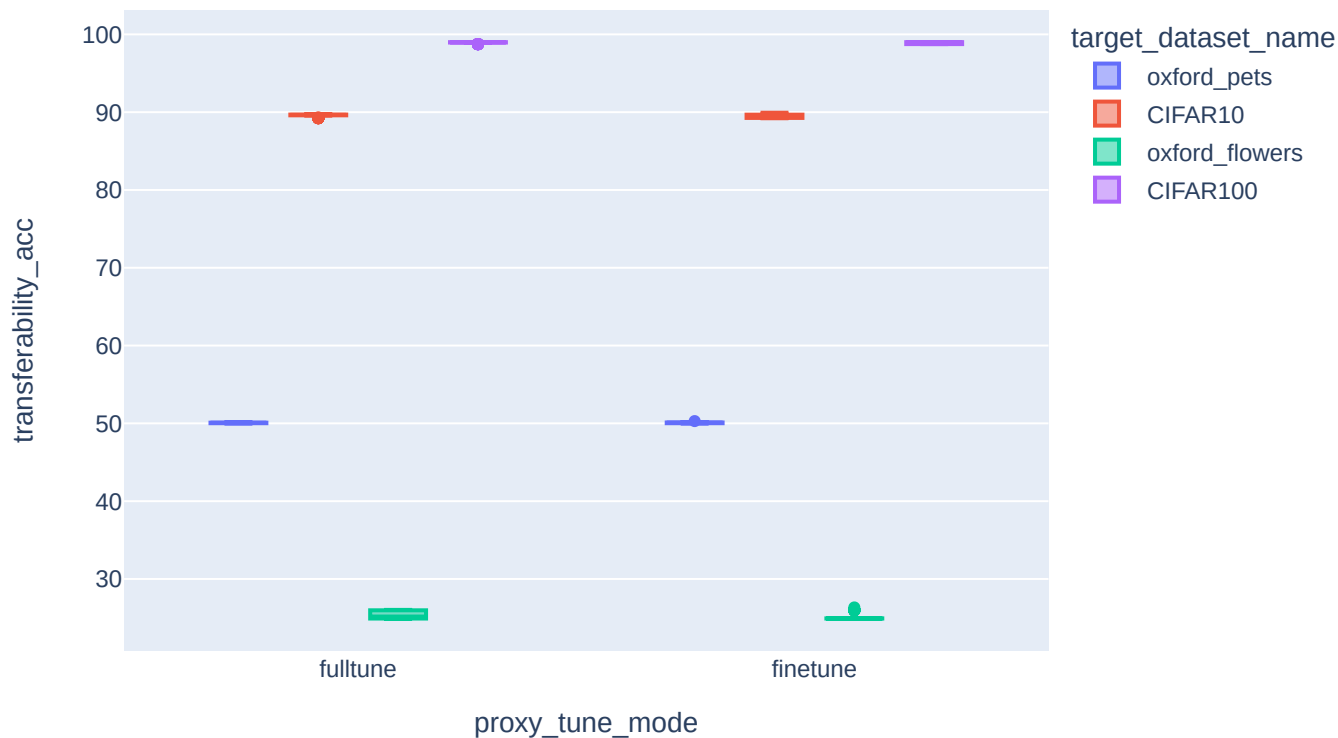

Supplement: supplementary_material [file transferability_box_converted_alexnet_colorization_in22k_pretext_proxy_tune_mode.pdf › adversarial_for_icml/figures/transferability_per_model_family/transferability_box_converted_alexnet_colorization_in22k_pretext_proxy_tune_mode.pdf]

Box plot for converted\_alexnet\_colorization\_in22k\_pretext and targeted

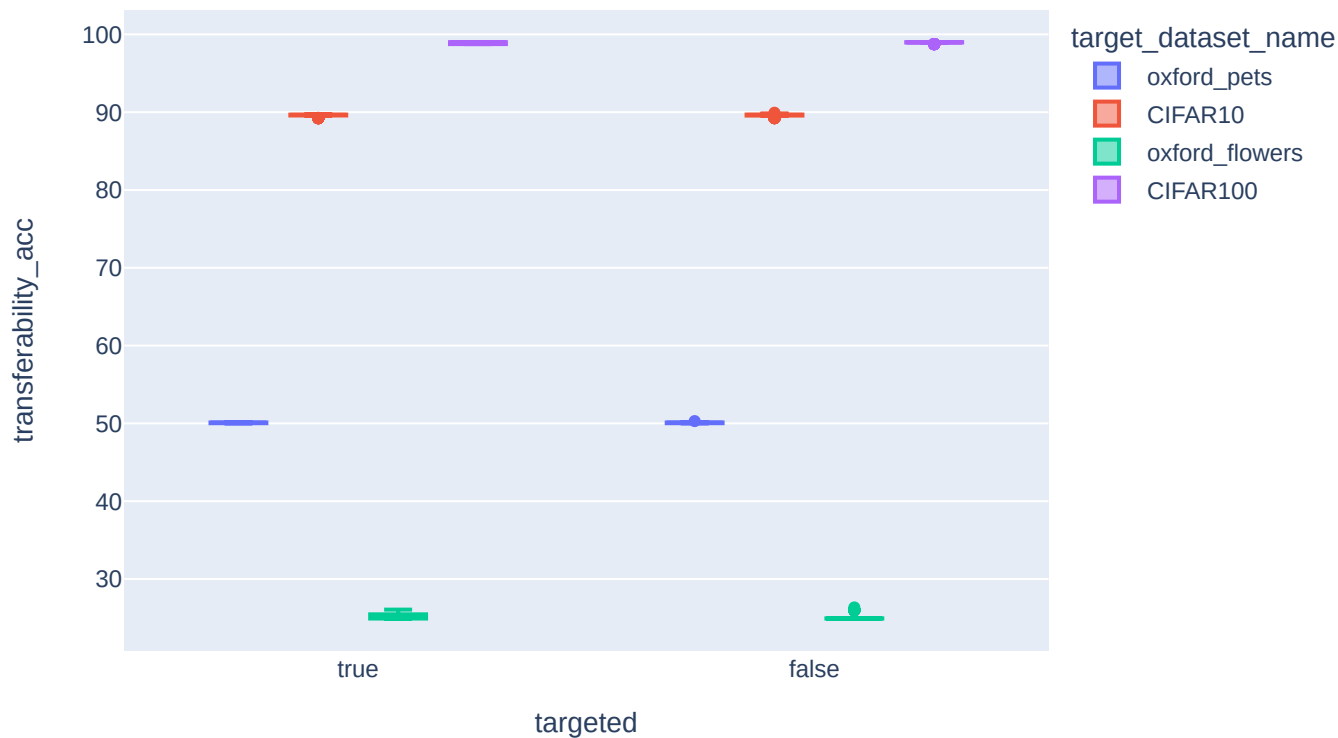

Supplement: supplementary_material [file transferability_box_converted_alexnet_colorization_in22k_pretext_targeted.pdf › adversarial_for_icml/figures/transferability_per_model_family/transferability_box_converted_alexnet_colorization_in22k_pretext_targeted.pdf]

Box plot for converted\_alexnet\_colorization\_yfcc100m\_pretext and attack\_name

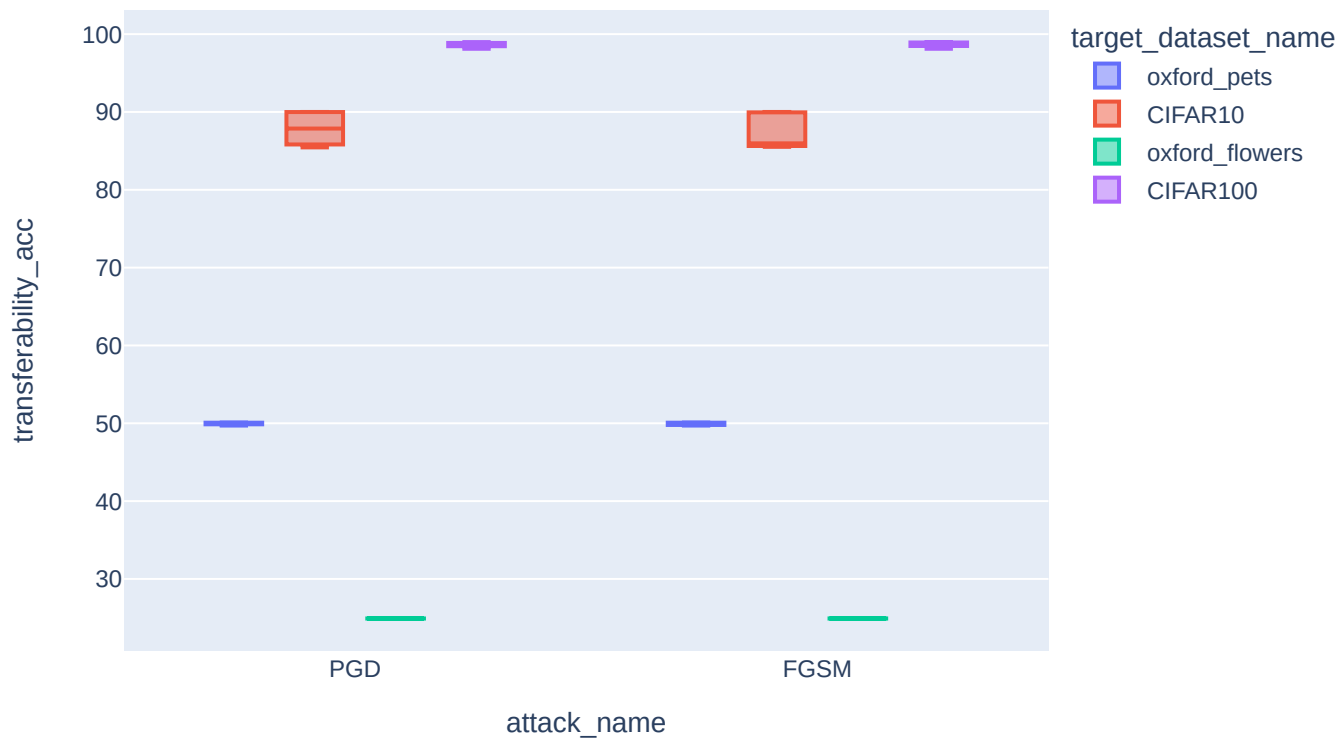

Supplement: supplementary_material [file transferability_box_converted_alexnet_colorization_yfcc100m_pretext_attack_name.pdf › adversarial_for_icml/figures/transferability_per_model_family/transferability_box_converted_alexnet_colorization_yfcc100m_pretext_attack_name.pdf]

Box plot for converted\_alexnet\_colorization\_yfcc100m\_pretext and proxy\_tune\_depth

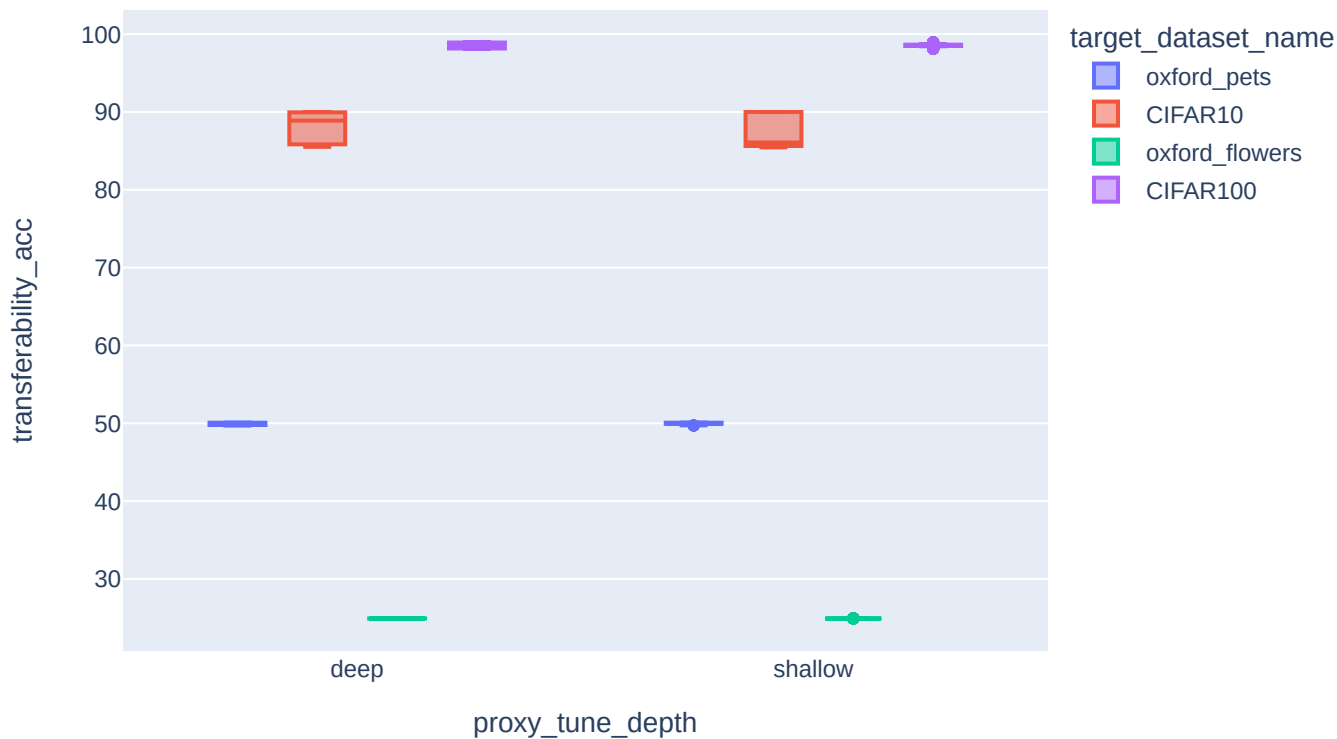

Supplement: supplementary_material [file transferability_box_converted_alexnet_colorization_yfcc100m_pretext_proxy_tune_depth.pdf › adversarial_for_icml/figures/transferability_per_model_family/transferability_box_converted_alexnet_colorization_yfcc100m_pretext_proxy_tune_depth.pdf]

Box plot for converted\_alexnet\_colorization\_yfcc100m\_pretext and proxy\_tune\_mode

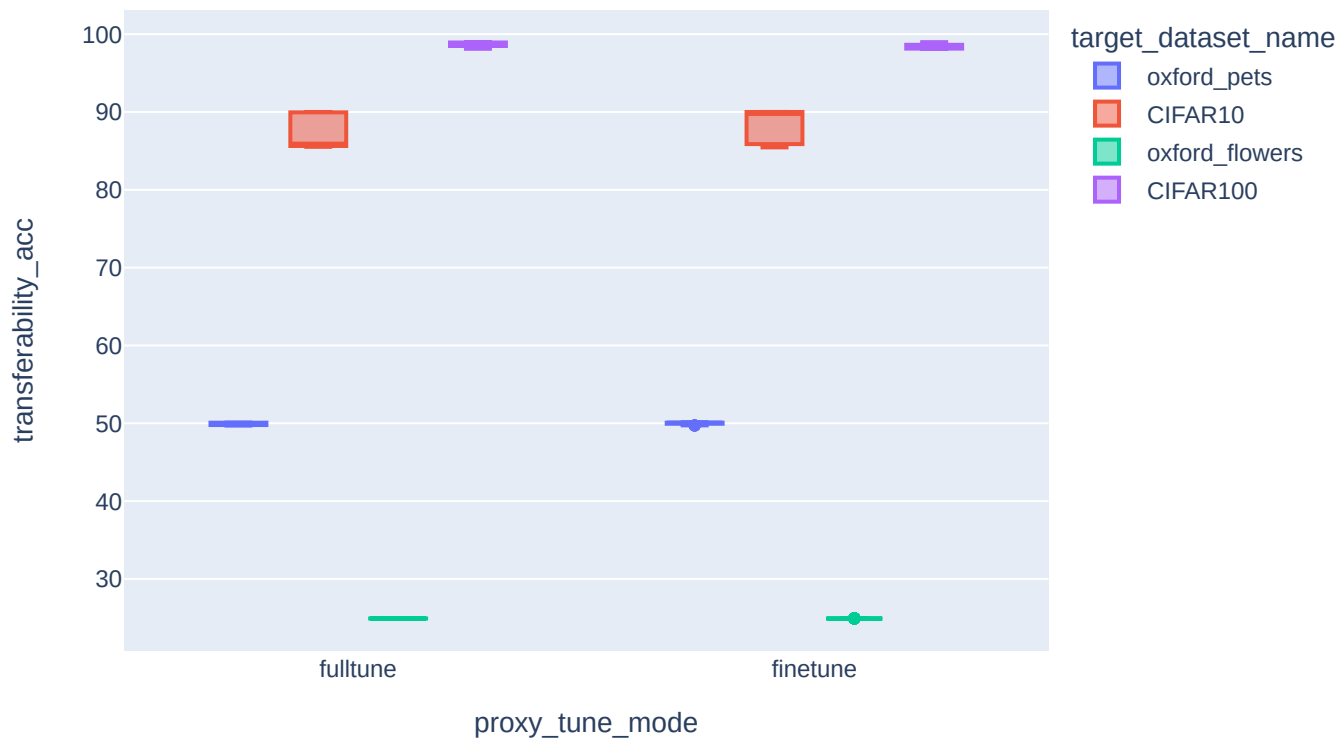

Supplement: supplementary_material [file transferability_box_converted_alexnet_colorization_yfcc100m_pretext_proxy_tune_mode.pdf › adversarial_for_icml/figures/transferability_per_model_family/transferability_box_converted_alexnet_colorization_yfcc100m_pretext_proxy_tune_mode.pdf]

Box plot for converted\_alexnet\_colorization\_yfcc100m\_pretext and targeted

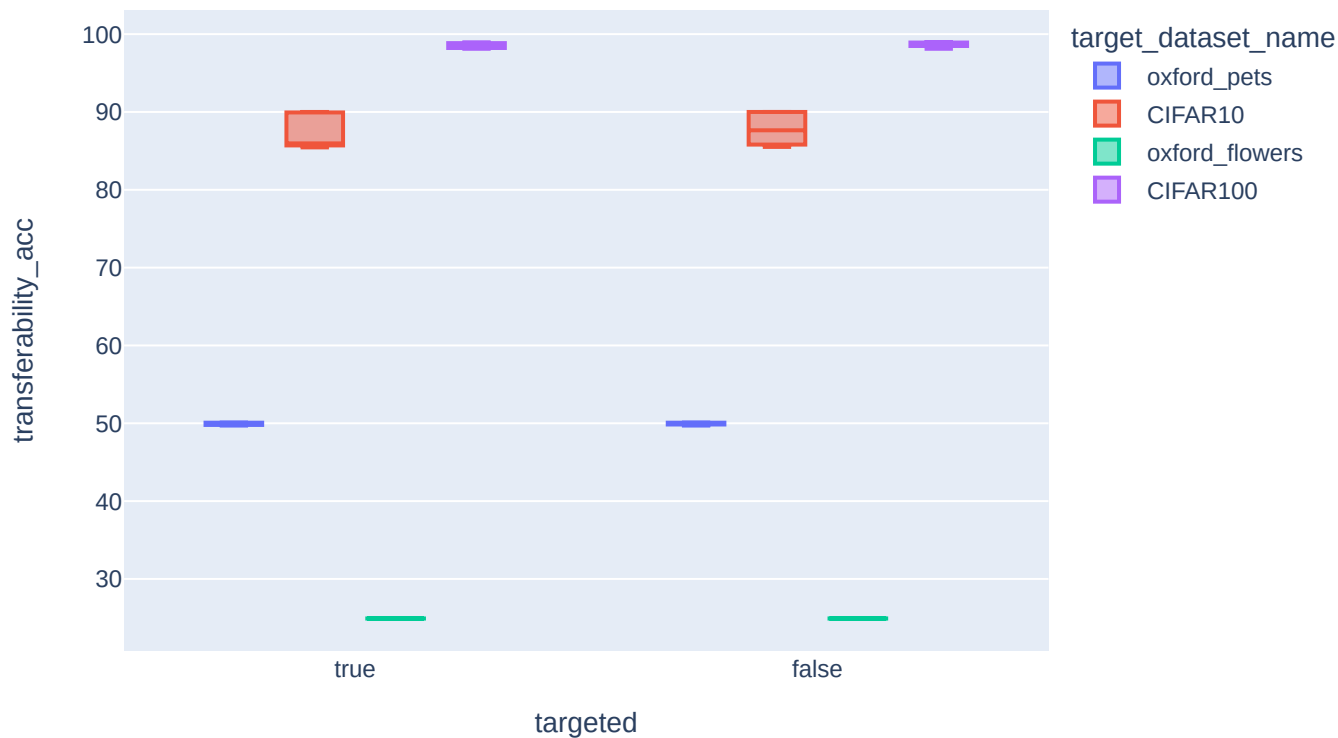

Supplement: supplementary_material [file transferability_box_converted_alexnet_colorization_yfcc100m_pretext_targeted.pdf › adversarial_for_icml/figures/transferability_per_model_family/transferability_box_converted_alexnet_colorization_yfcc100m_pretext_targeted.pdf]

Box plot for converted\_alexnet\_jigsaw\_in1k\_pretext and attack\_name

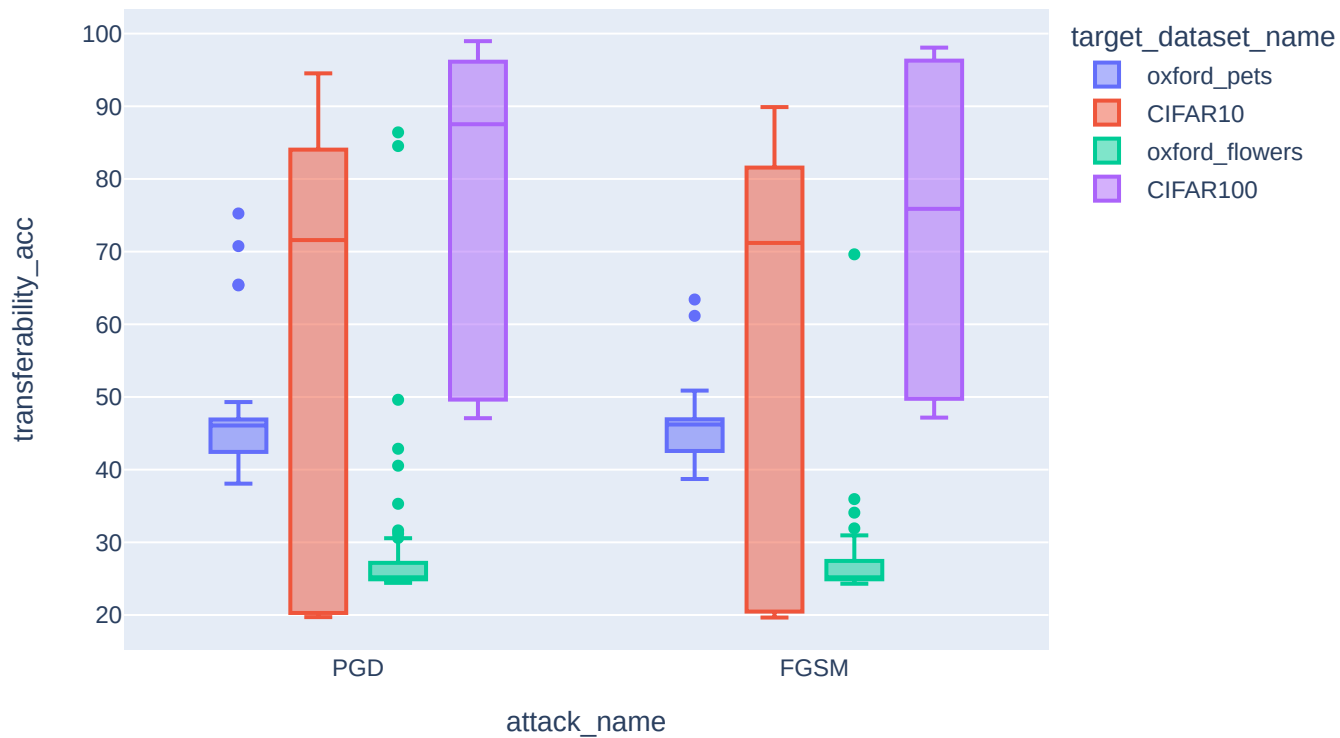

Supplement: supplementary_material [file transferability_box_converted_alexnet_jigsaw_in1k_pretext_attack_name.pdf › adversarial_for_icml/figures/transferability_per_model_family/transferability_box_converted_alexnet_jigsaw_in1k_pretext_attack_name.pdf]

Box plot for converted\_alexnet\_jigsaw\_in1k\_pretext and proxy\_tune\_depth

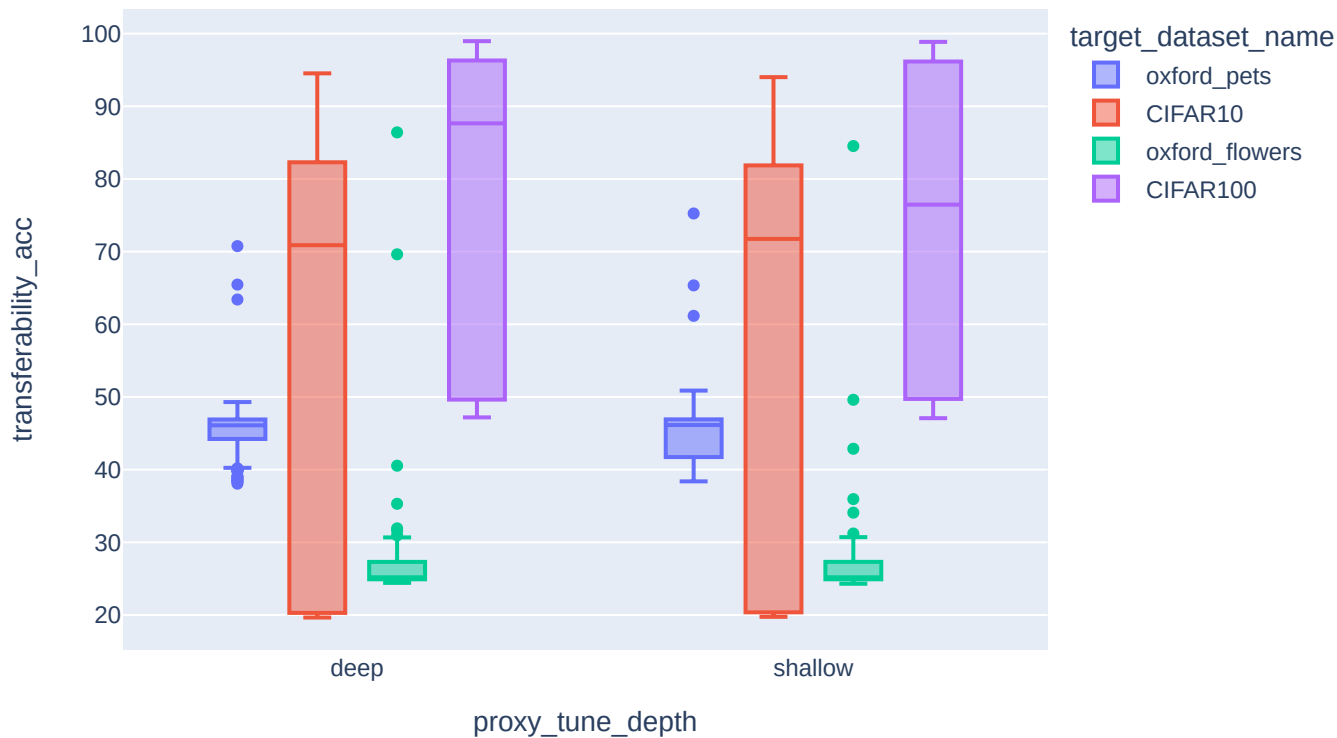

Supplement: supplementary_material [file transferability_box_converted_alexnet_jigsaw_in1k_pretext_proxy_tune_depth.pdf › adversarial_for_icml/figures/transferability_per_model_family/transferability_box_converted_alexnet_jigsaw_in1k_pretext_proxy_tune_depth.pdf]

Box plot for converted\_alexnet\_jigsaw\_in1k\_pretext and proxy\_tune\_mode

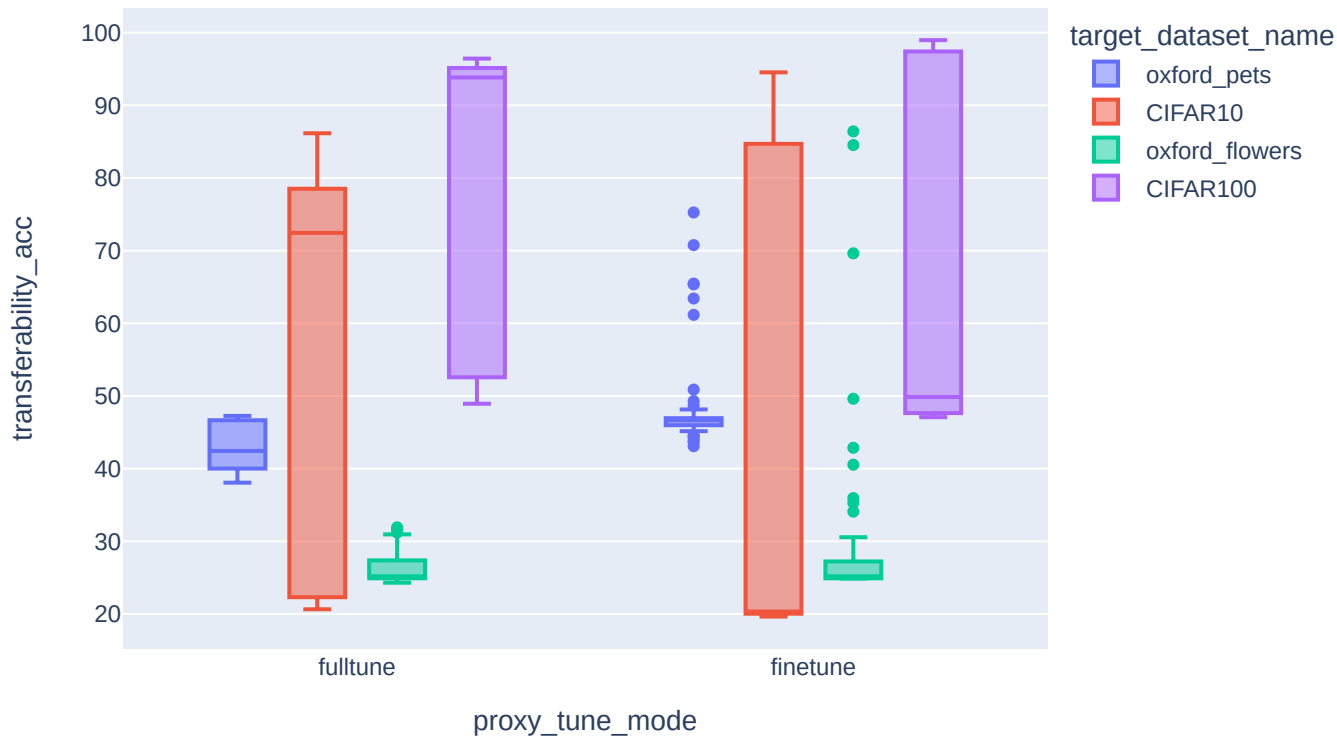

Supplement: supplementary_material [file transferability_box_converted_alexnet_jigsaw_in1k_pretext_proxy_tune_mode.pdf › adversarial_for_icml/figures/transferability_per_model_family/transferability_box_converted_alexnet_jigsaw_in1k_pretext_proxy_tune_mode.pdf]

Box plot for converted\_alexnet\_jigsaw\_in1k\_pretext and targeted

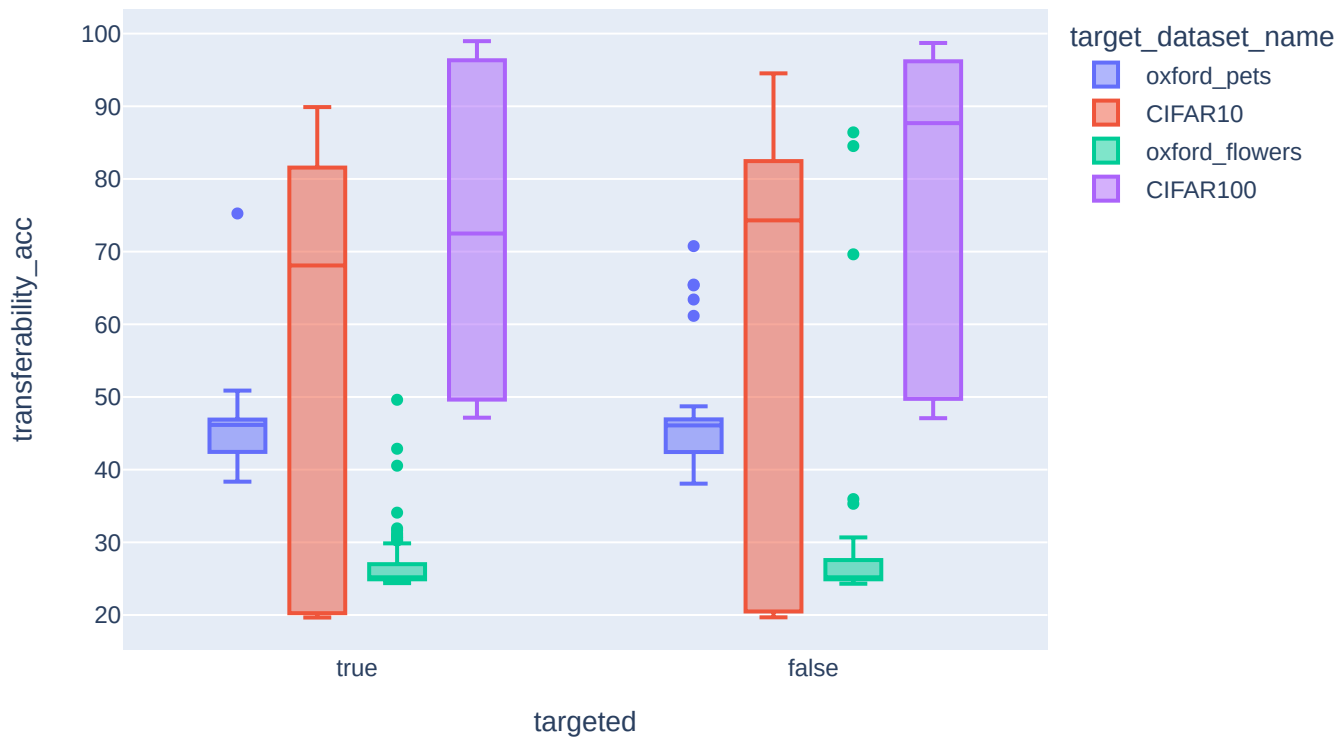

Supplement: supplementary_material [file transferability_box_converted_alexnet_jigsaw_in1k_pretext_targeted.pdf › adversarial_for_icml/figures/transferability_per_model_family/transferability_box_converted_alexnet_jigsaw_in1k_pretext_targeted.pdf]

Box plot for converted\_alexnet\_jigsaw\_in22k\_pretext and attack\_name

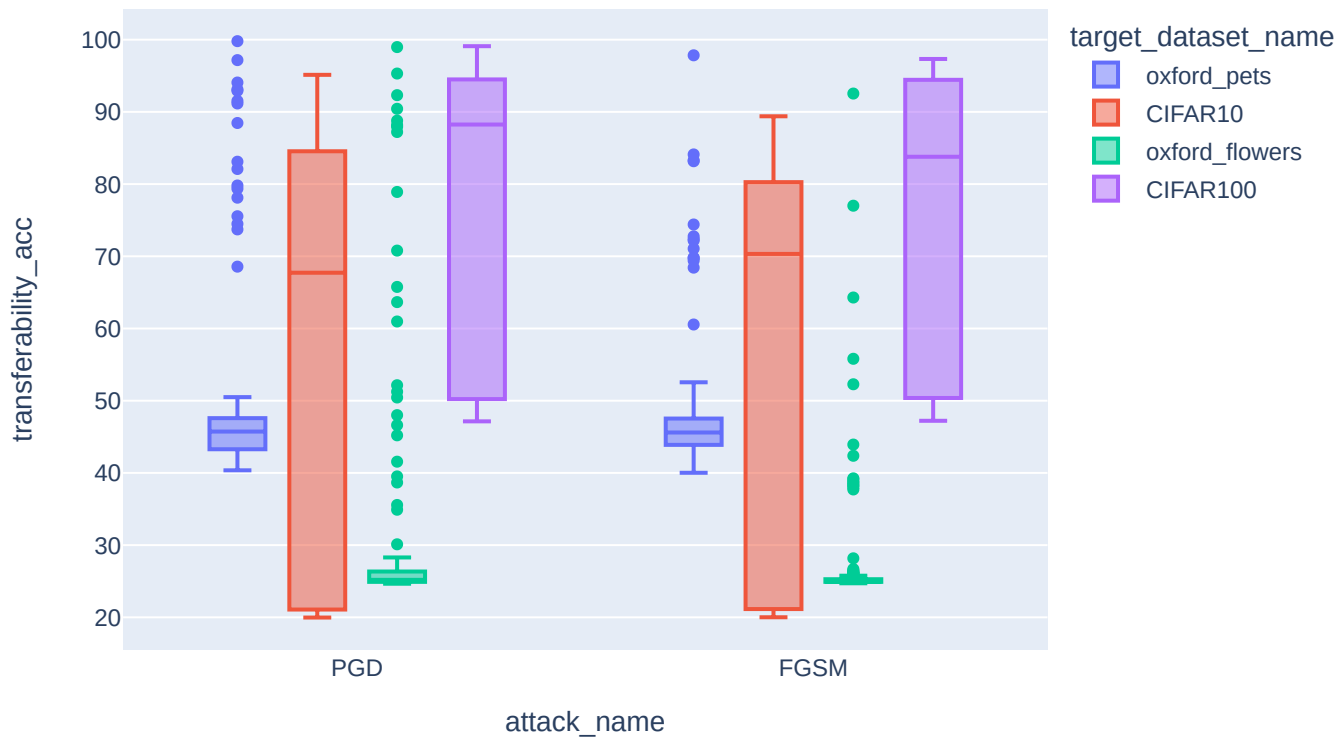

Supplement: supplementary_material [file transferability_box_converted_alexnet_jigsaw_in22k_pretext_attack_name.pdf › adversarial_for_icml/figures/transferability_per_model_family/transferability_box_converted_alexnet_jigsaw_in22k_pretext_attack_name.pdf]

Box plot for converted\_alexnet\_jigsaw\_in22k\_pretext and proxy\_tune\_depth

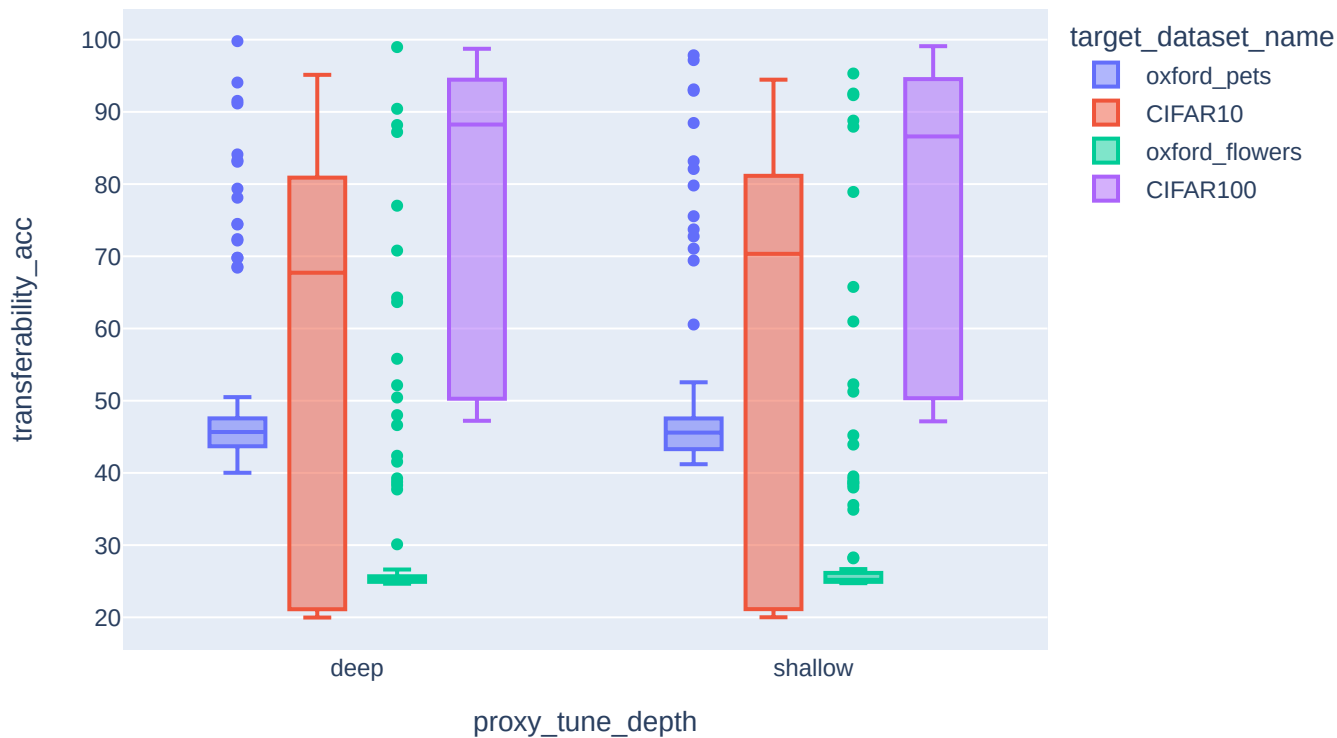

Supplement: supplementary_material [file transferability_box_converted_alexnet_jigsaw_in22k_pretext_proxy_tune_depth.pdf › adversarial_for_icml/figures/transferability_per_model_family/transferability_box_converted_alexnet_jigsaw_in22k_pretext_proxy_tune_depth.pdf]

Box plot for converted\_alexnet\_jigsaw\_in22k\_pretext and proxy\_tune\_mode

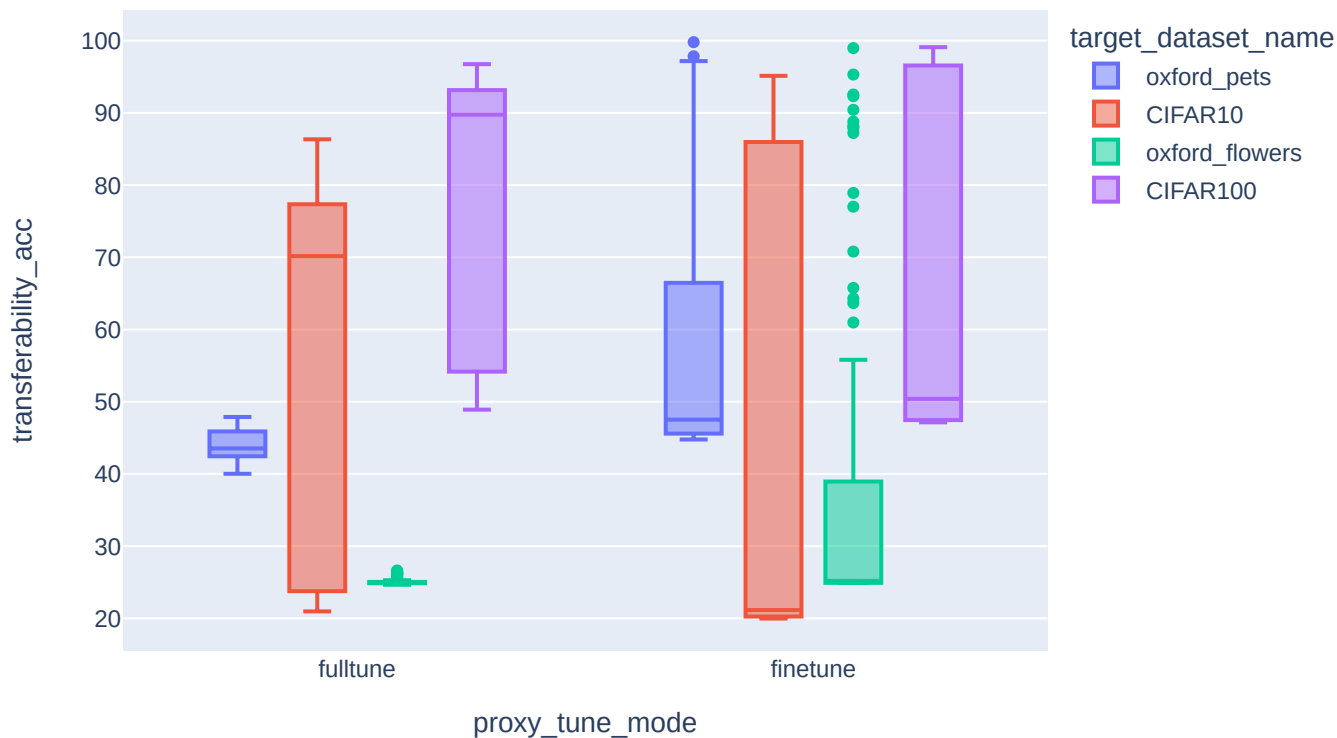

Supplement: supplementary_material [file transferability_box_converted_alexnet_jigsaw_in22k_pretext_proxy_tune_mode.pdf › adversarial_for_icml/figures/transferability_per_model_family/transferability_box_converted_alexnet_jigsaw_in22k_pretext_proxy_tune_mode.pdf]

Box plot for converted\_alexnet\_jigsaw\_in22k\_pretext and targeted

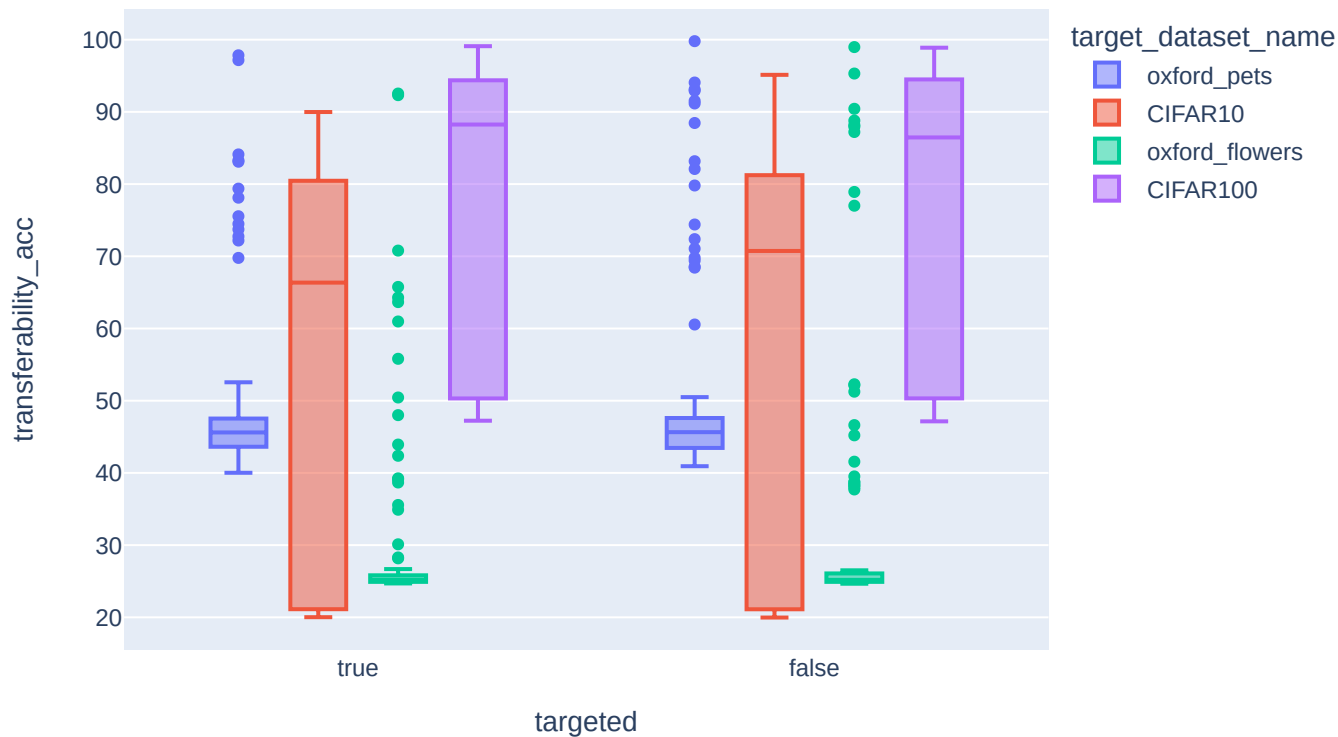

Supplement: supplementary_material [file transferability_box_converted_alexnet_jigsaw_in22k_pretext_targeted.pdf › adversarial_for_icml/figures/transferability_per_model_family/transferability_box_converted_alexnet_jigsaw_in22k_pretext_targeted.pdf]

Box plot for converted\_vissl\_jigsaw\_rn50\_perm2k\_in22k\_8gpu\_ep105 and attack\_name

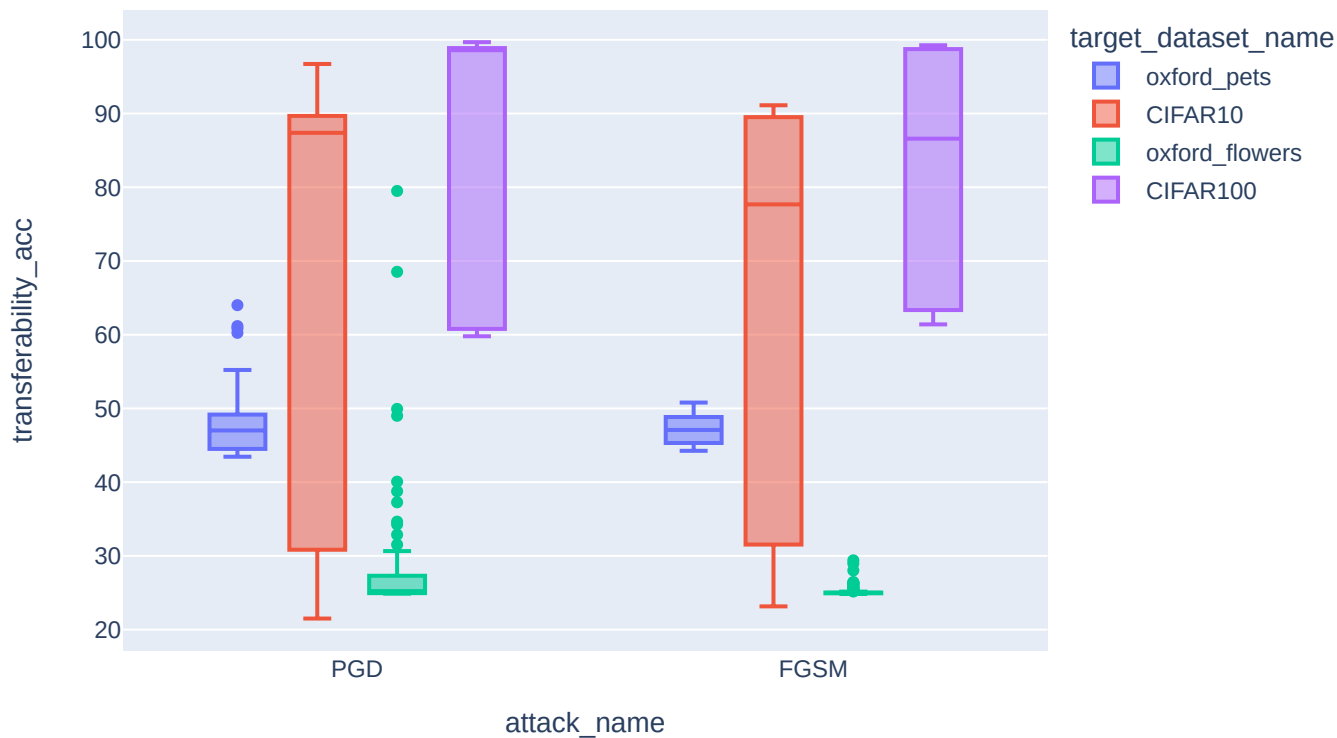

Supplement: supplementary_material [file transferability_box_converted_vissl_jigsaw_rn50_perm2k_in22k_8gpu_ep105_attack_name.pdf › adversarial_for_icml/figures/transferability_per_model_family/transferability_box_converted_vissl_jigsaw_rn50_perm2k_in22k_8gpu_ep105_attack_name.pdf]

Box plot for converted\_vissl\_jigsaw\_rn50\_perm2k\_in22k\_8gpu\_ep105 and proxy\_tune\_c

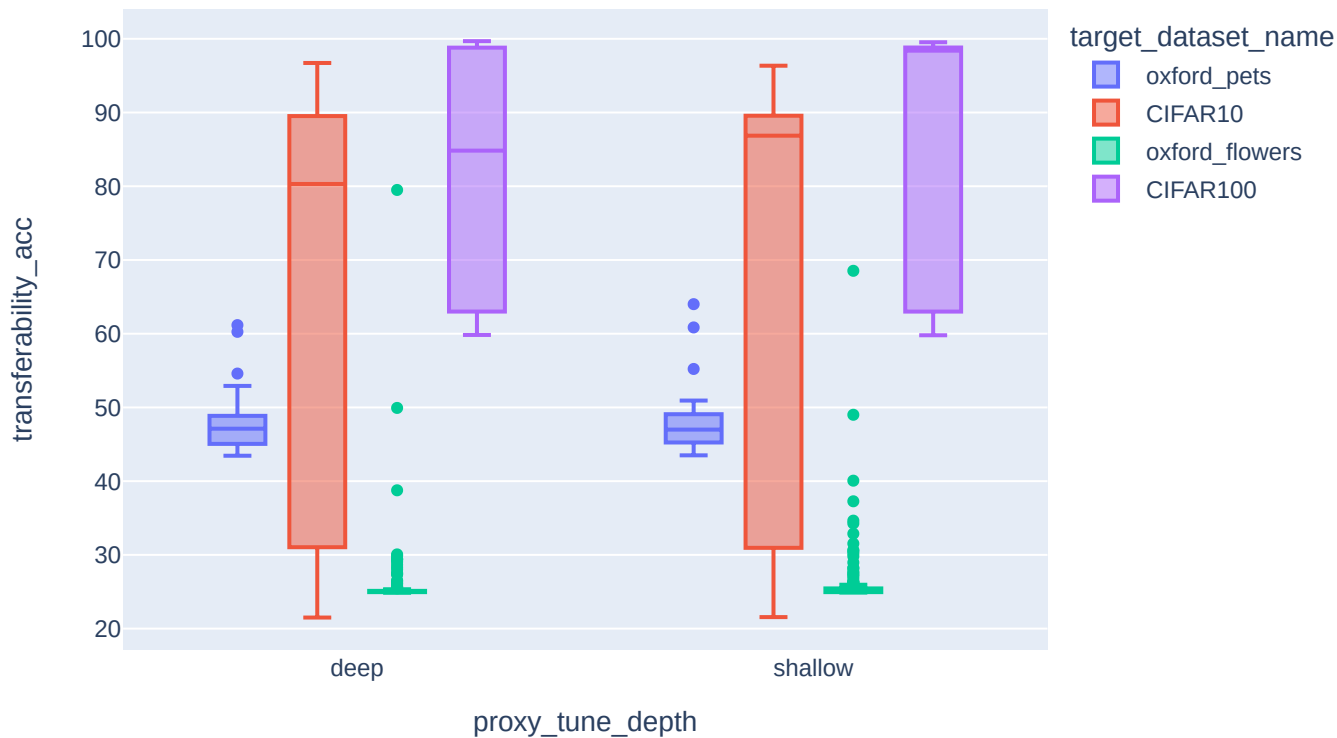

Supplement: supplementary_material [file transferability_box_converted_vissl_jigsaw_rn50_perm2k_in22k_8gpu_ep105_proxy_tune_depth.pdf › adversarial_for_icml/figures/transferability_per_model_family/transferability_box_converted_vissl_jigsaw_rn50_perm2k_in22k_8gpu_ep105_proxy_tune_depth.pdf]

Box plot for converted\_vissl\_jigsaw\_rn50\_perm2k\_in22k\_8gpu\_ep105 and proxy\_tune\_r

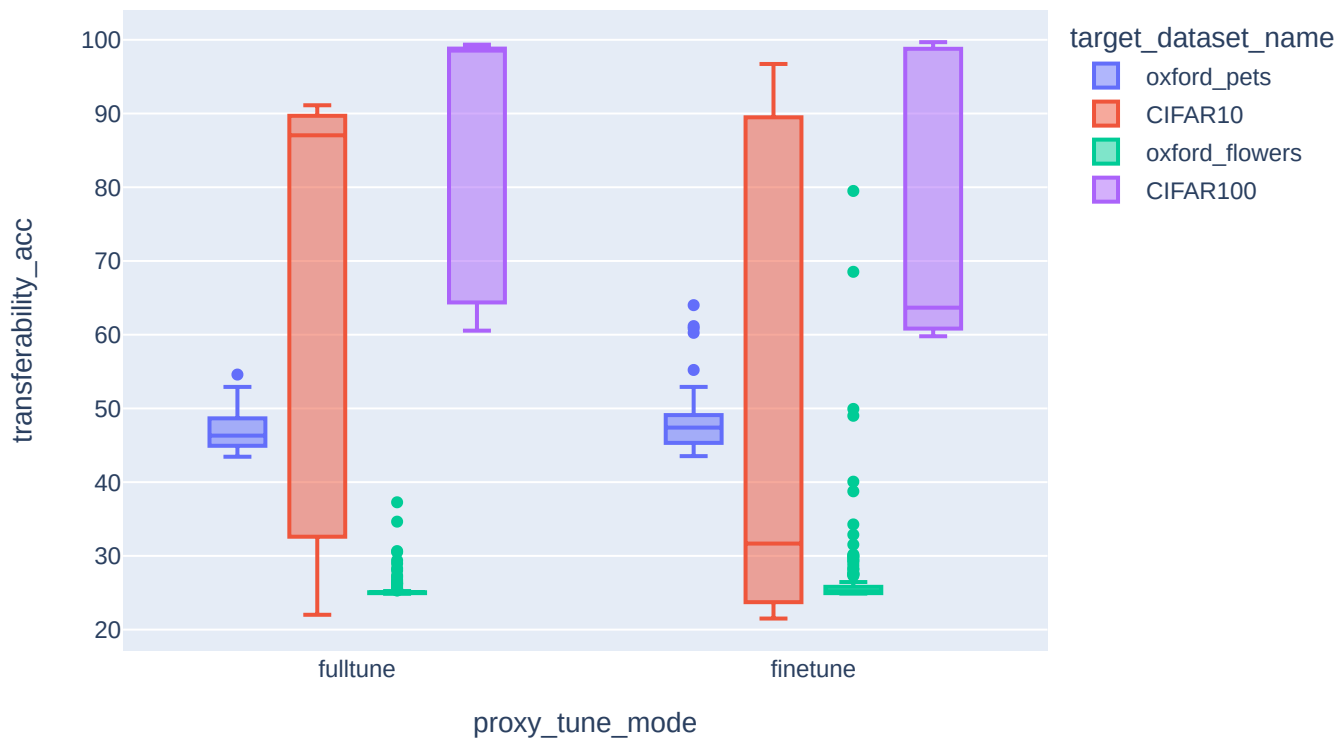

Supplement: supplementary_material [file transferability_box_converted_vissl_jigsaw_rn50_perm2k_in22k_8gpu_ep105_proxy_tune_mode.pdf › adversarial_for_icml/figures/transferability_per_model_family/transferability_box_converted_vissl_jigsaw_rn50_perm2k_in22k_8gpu_ep105_proxy_tune_mode.pdf]

Box plot for converted\_vissl\_jigsaw\_rn50\_perm2k\_in22k\_8gpu\_ep105 and targeted

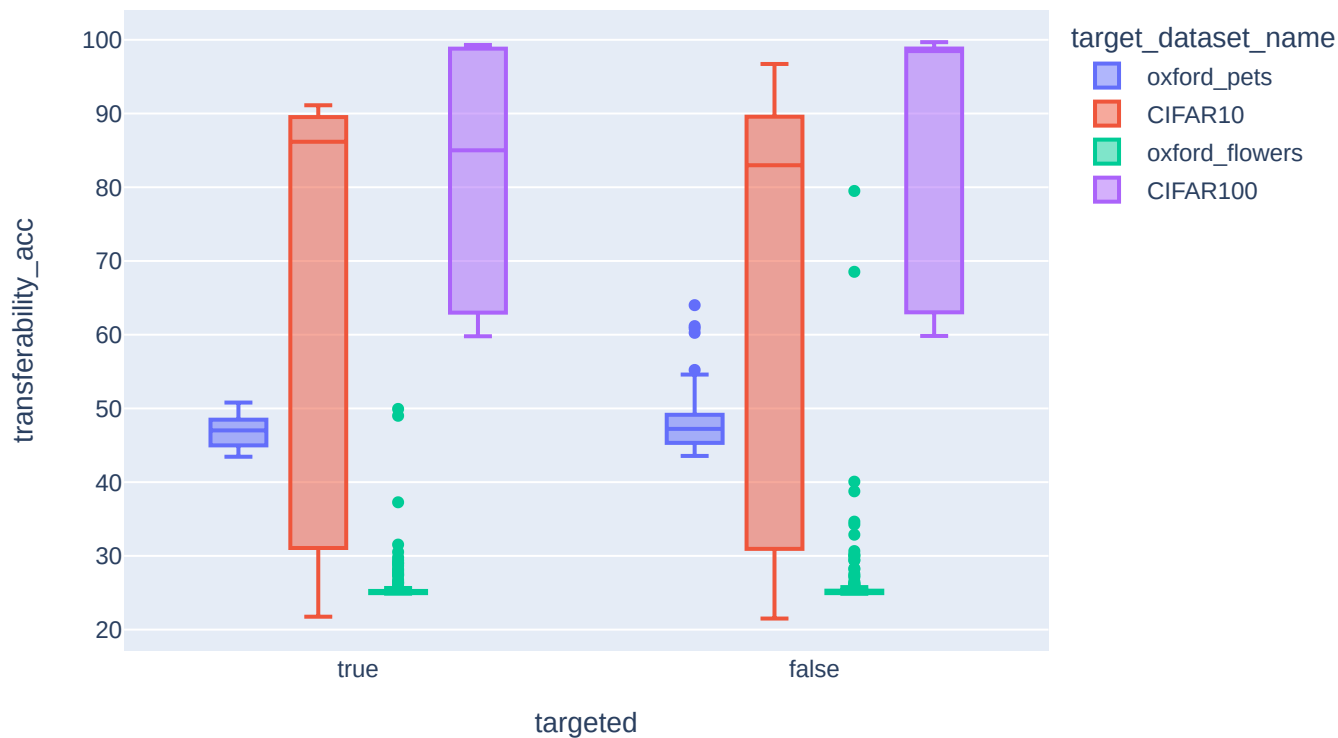

Supplement: supplementary_material [file transferability_box_converted_vissl_jigsaw_rn50_perm2k_in22k_8gpu_ep105_targeted.pdf › adversarial_for_icml/figures/transferability_per_model_family/transferability_box_converted_vissl_jigsaw_rn50_perm2k_in22k_8gpu_ep105_targeted.pdf]

Box plot for converted\_vissl\_rn50\_colorization\_in1k\_goyal19 and attack\_name

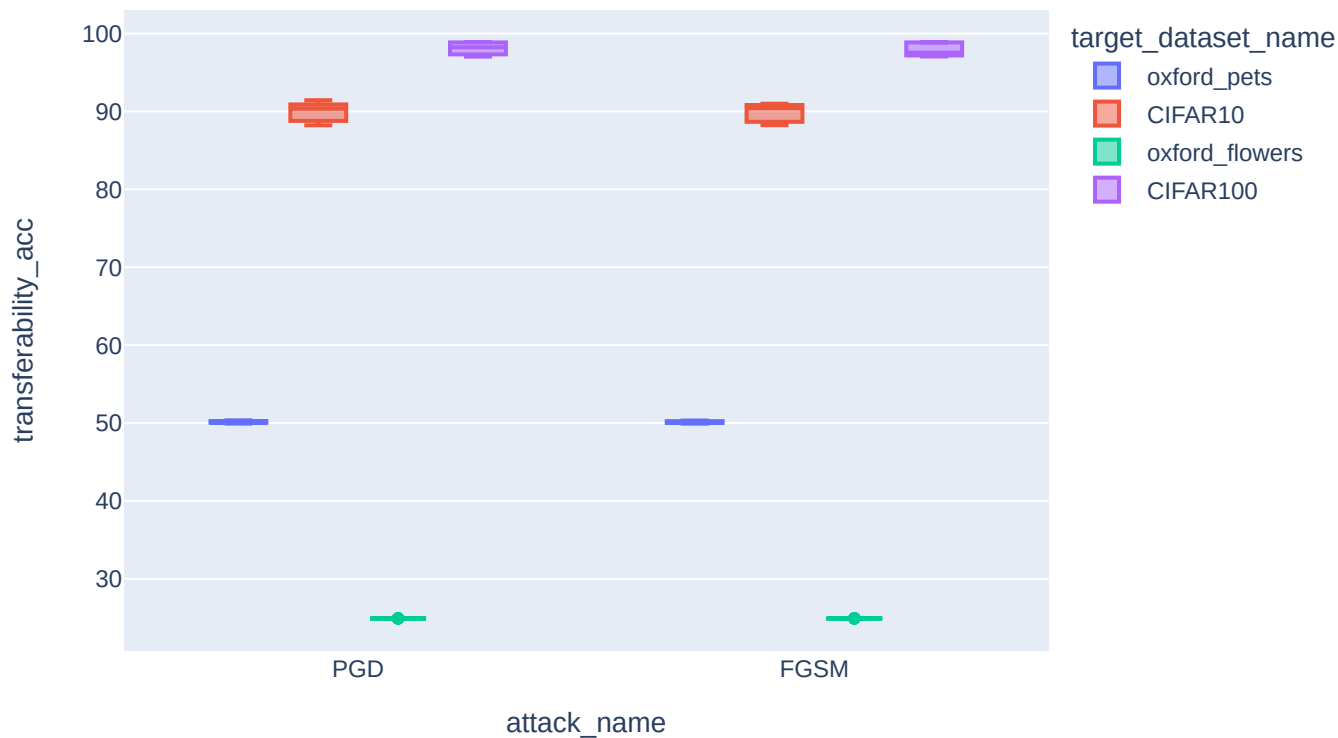

Supplement: supplementary_material [file transferability_box_converted_vissl_rn50_colorization_in1k_goyal19_attack_name.pdf › adversarial_for_icml/figures/transferability_per_model_family/transferability_box_converted_vissl_rn50_colorization_in1k_goyal19_attack_name.pdf]

Box plot for converted\_vissl\_rn50\_colorization\_in1k\_goyal19 and proxy\_tune\_depth

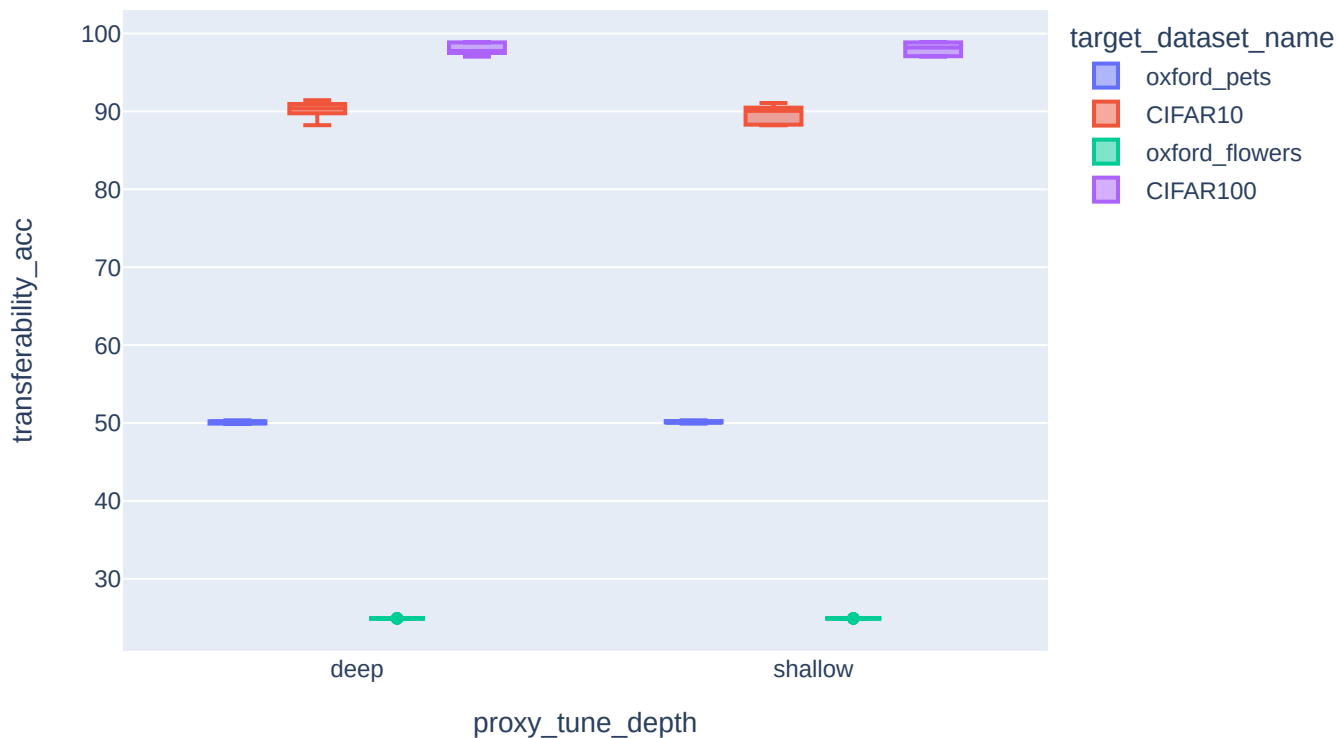

Supplement: supplementary_material [file transferability_box_converted_vissl_rn50_colorization_in1k_goyal19_proxy_tune_depth.pdf › adversarial_for_icml/figures/transferability_per_model_family/transferability_box_converted_vissl_rn50_colorization_in1k_goyal19_proxy_tune_depth.pdf]

Box plot for converted\_vissl\_rn50\_colorization\_in1k\_goyal19 and proxy\_tune\_mode

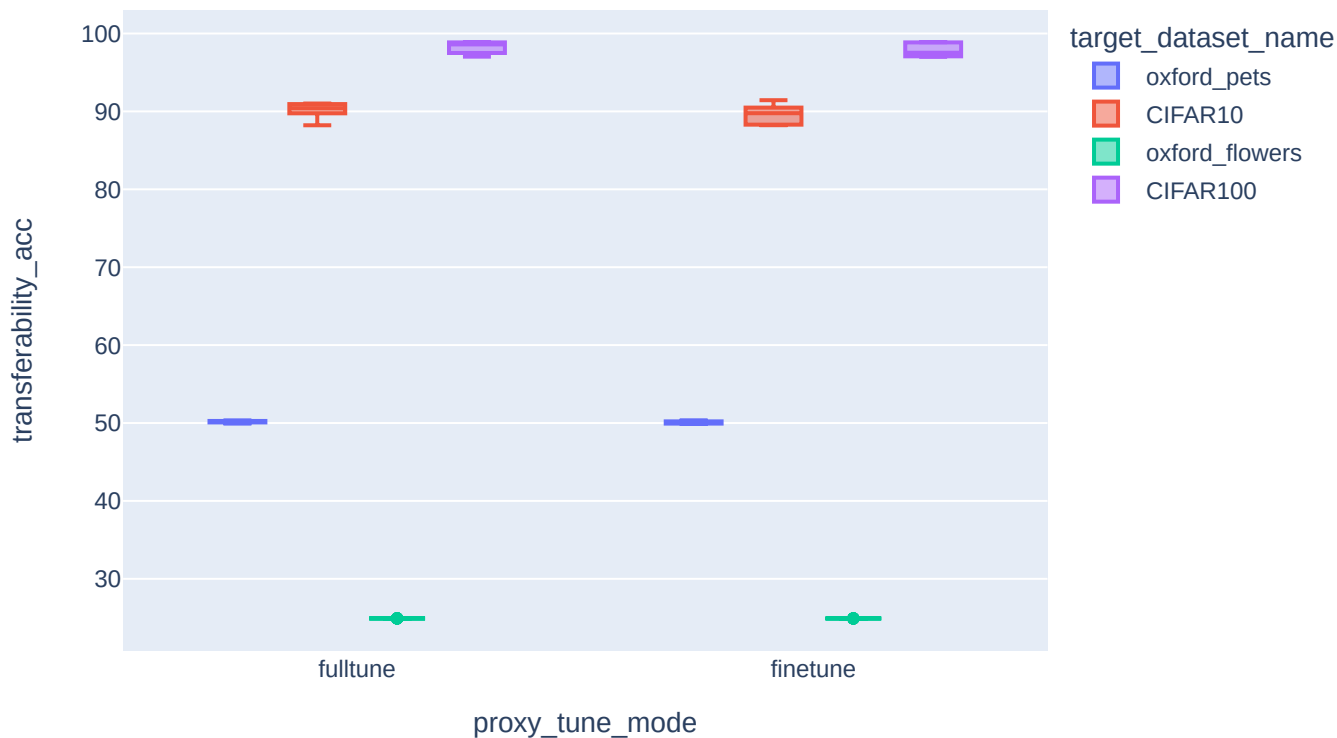

Supplement: supplementary_material [file transferability_box_converted_vissl_rn50_colorization_in1k_goyal19_proxy_tune_mode.pdf › adversarial_for_icml/figures/transferability_per_model_family/transferability_box_converted_vissl_rn50_colorization_in1k_goyal19_proxy_tune_mode.pdf]

Box plot for converted\_vissl\_rn50\_colorization\_in1k\_goyal19 and targeted

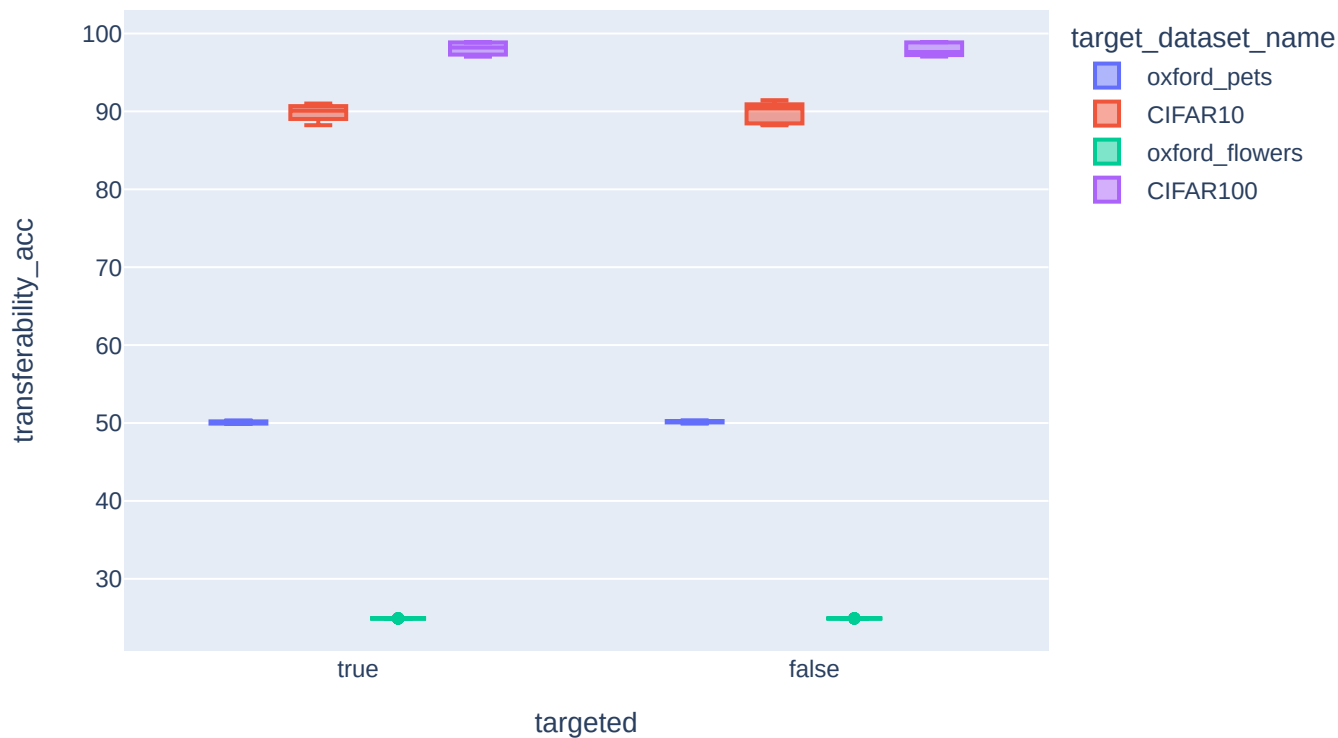

Supplement: supplementary_material [file transferability_box_converted_vissl_rn50_colorization_in1k_goyal19_targeted.pdf › adversarial_for_icml/figures/transferability_per_model_family/transferability_box_converted_vissl_rn50_colorization_in1k_goyal19_targeted.pdf]

Box plot for converted\_vissl\_rn50\_colorization\_in22k\_goyal19 and attack\_name

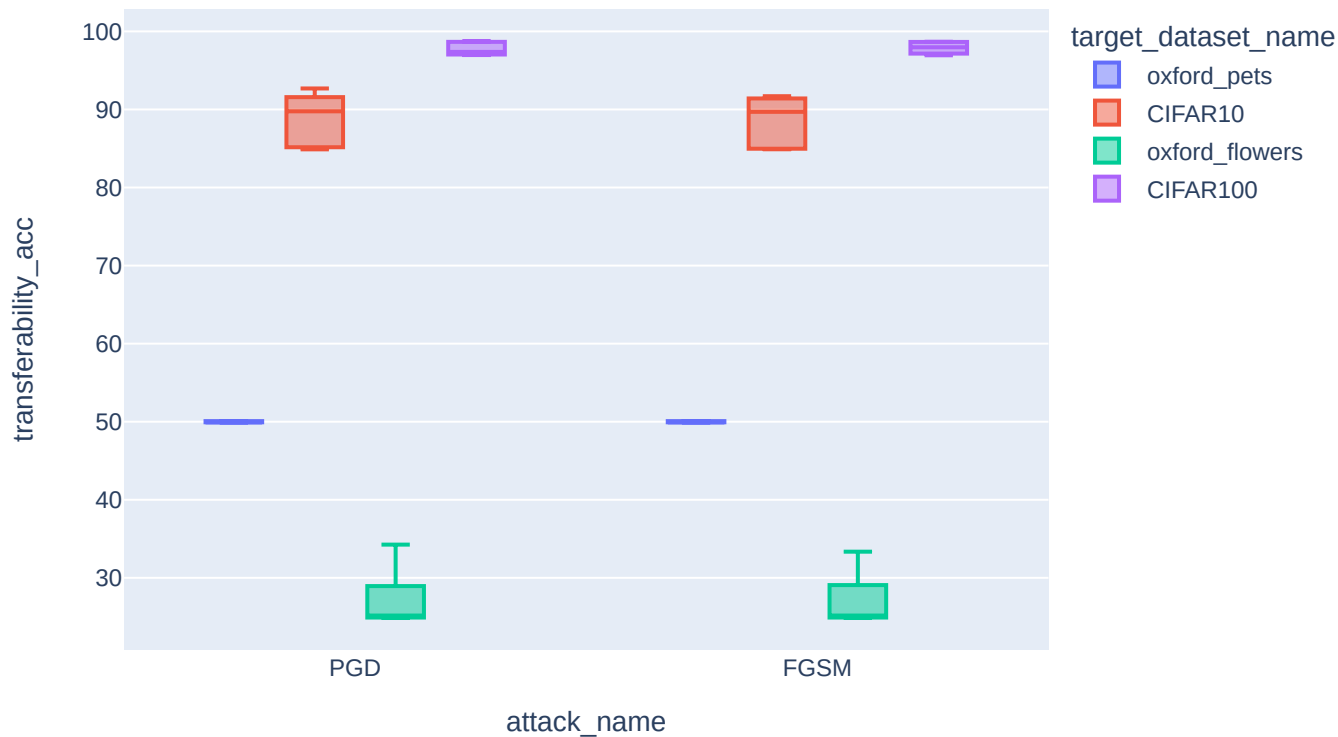

Supplement: supplementary_material [file transferability_box_converted_vissl_rn50_colorization_in22k_goyal19_attack_name.pdf › adversarial_for_icml/figures/transferability_per_model_family/transferability_box_converted_vissl_rn50_colorization_in22k_goyal19_attack_name.pdf]

Box plot for converted\_vissl\_rn50\_colorization\_in22k\_goyal19 and proxy\_tune\_depth

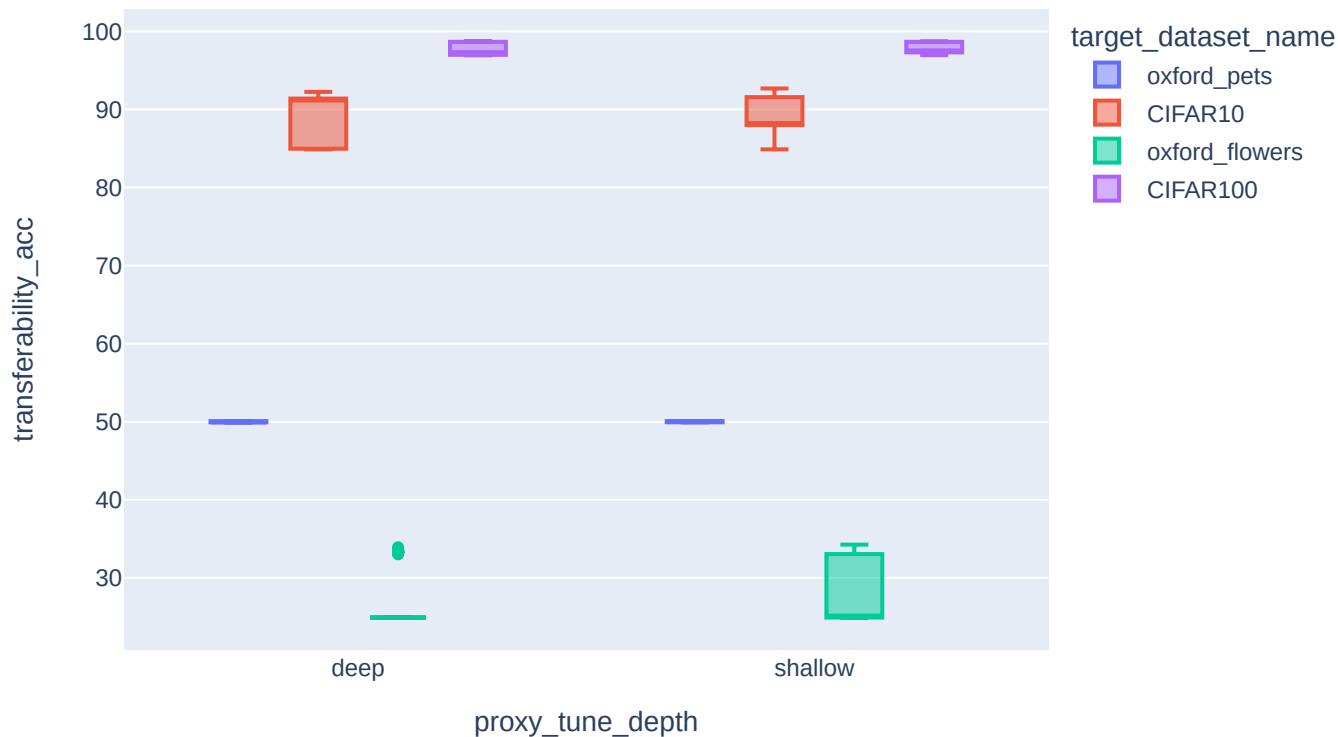

Supplement: supplementary_material [file transferability_box_converted_vissl_rn50_colorization_in22k_goyal19_proxy_tune_depth.pdf › adversarial_for_icml/figures/transferability_per_model_family/transferability_box_converted_vissl_rn50_colorization_in22k_goyal19_proxy_tune_depth.pdf]

Box plot for converted\_vissl\_rn50\_colorization\_in22k\_goyal19 and proxy\_tune\_mode

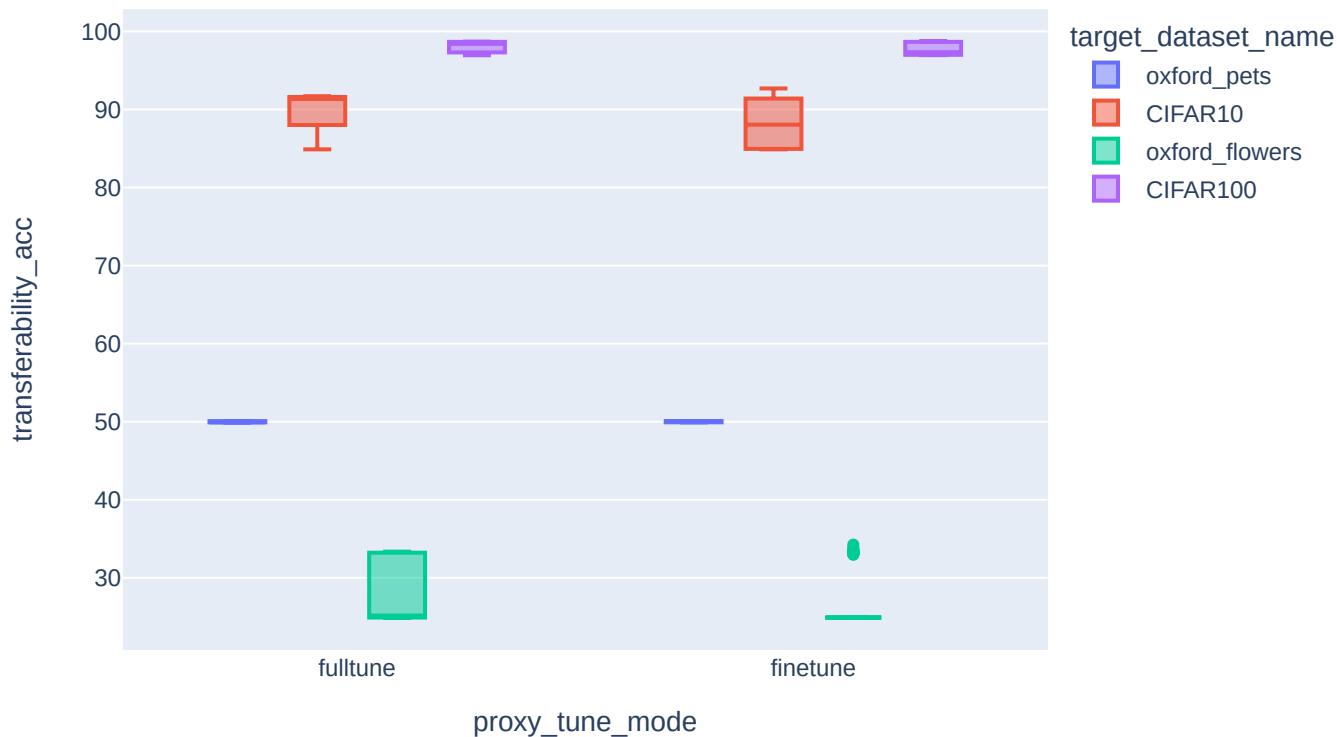

Supplement: supplementary_material [file transferability_box_converted_vissl_rn50_colorization_in22k_goyal19_proxy_tune_mode.pdf › adversarial_for_icml/figures/transferability_per_model_family/transferability_box_converted_vissl_rn50_colorization_in22k_goyal19_proxy_tune_mode.pdf]

Box plot for converted\_vissl\_rn50\_colorization\_in22k\_goyal19 and targeted

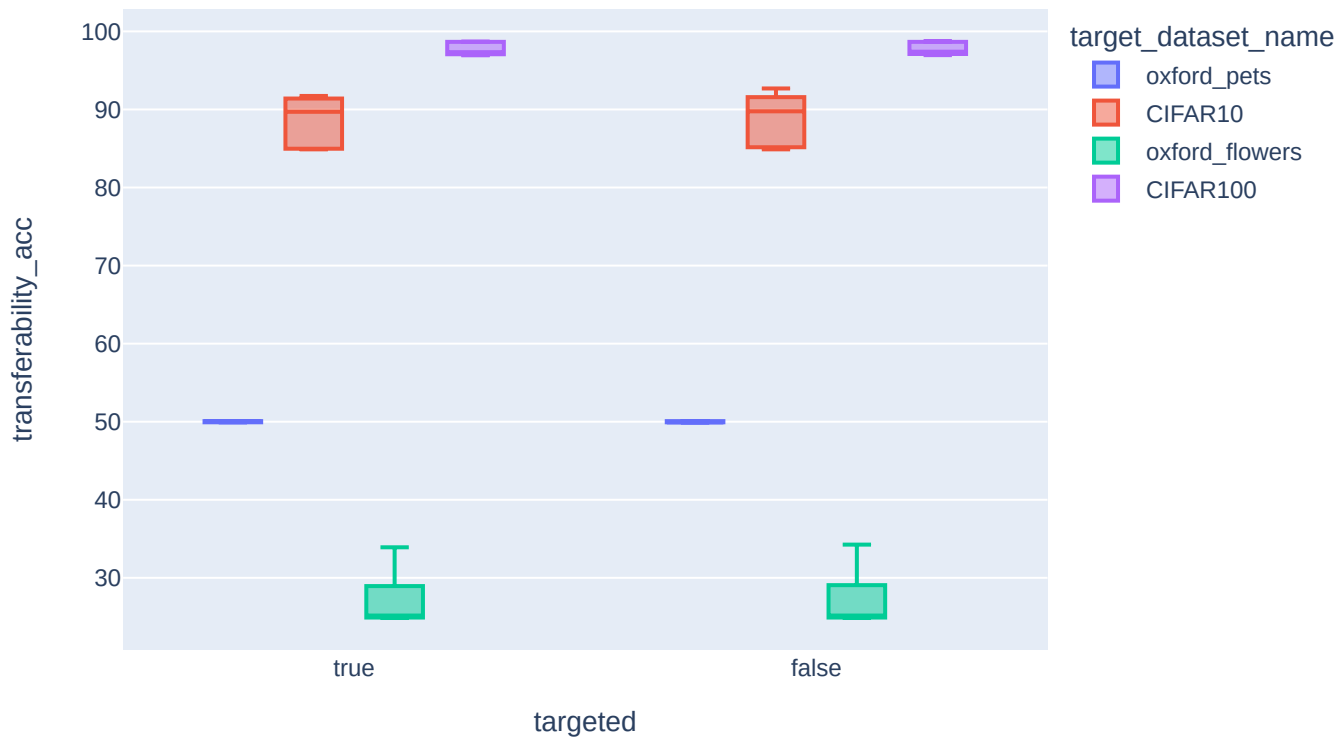

Supplement: supplementary_material [file transferability_box_converted_vissl_rn50_colorization_in22k_goyal19_targeted.pdf › adversarial_for_icml/figures/transferability_per_model_family/transferability_box_converted_vissl_rn50_colorization_in22k_goyal19_targeted.pdf]

Box plot for converted\_vissl\_rn50\_jigsaw\_in1k\_goyal19 and attack\_name

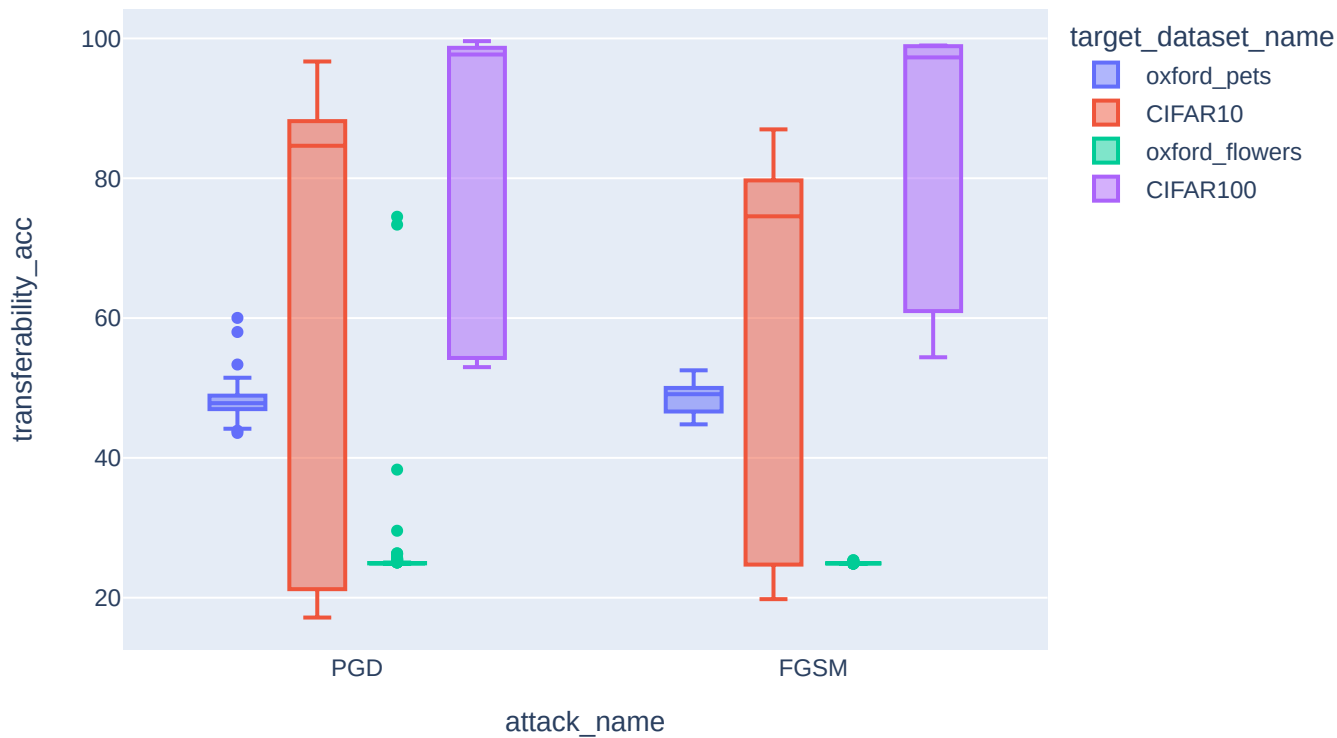

Supplement: supplementary_material [file transferability_box_converted_vissl_rn50_jigsaw_in1k_goyal19_attack_name.pdf › adversarial_for_icml/figures/transferability_per_model_family/transferability_box_converted_vissl_rn50_jigsaw_in1k_goyal19_attack_name.pdf]

Box plot for converted\_vissl\_rn50\_jigsaw\_in1k\_goyal19 and proxy\_tune\_depth

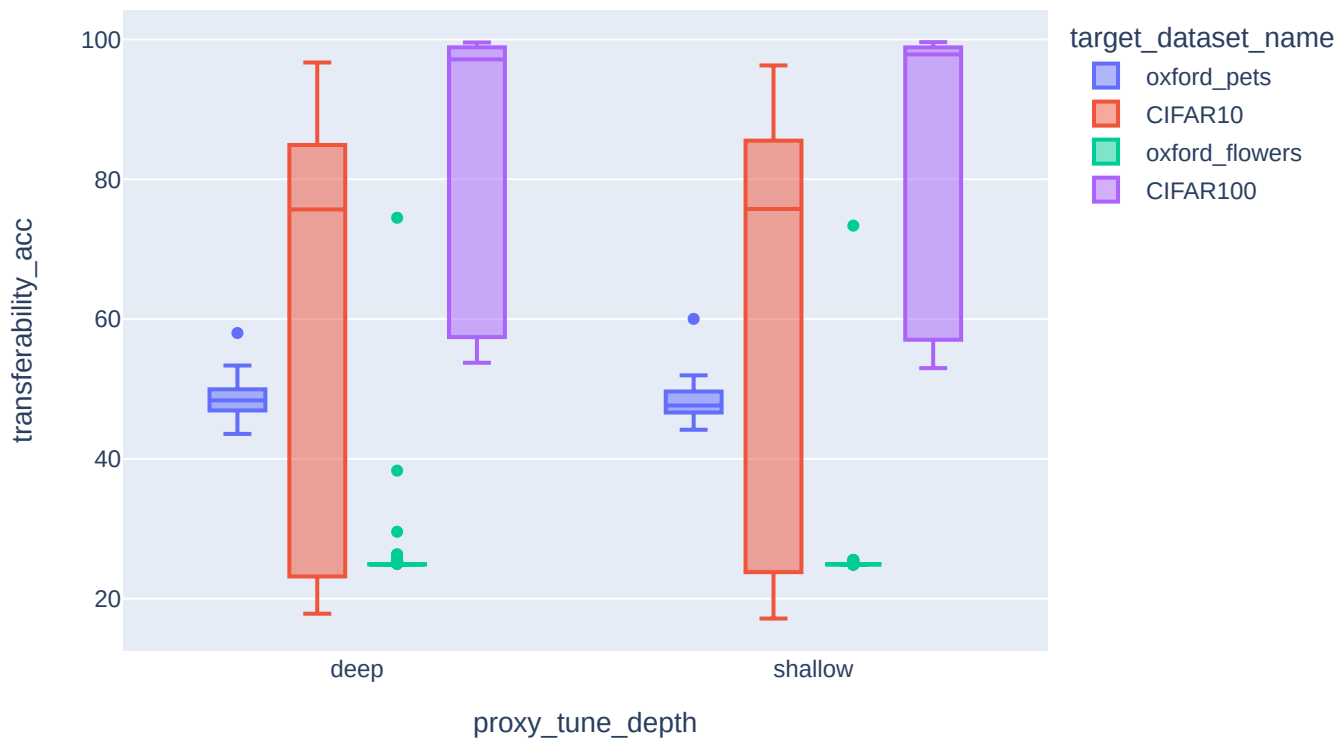

Supplement: supplementary_material [file transferability_box_converted_vissl_rn50_jigsaw_in1k_goyal19_proxy_tune_depth.pdf › adversarial_for_icml/figures/transferability_per_model_family/transferability_box_converted_vissl_rn50_jigsaw_in1k_goyal19_proxy_tune_depth.pdf]

Box plot for converted\_vissl\_rn50\_jigsaw\_in1k\_goyal19 and proxy\_tune\_mode

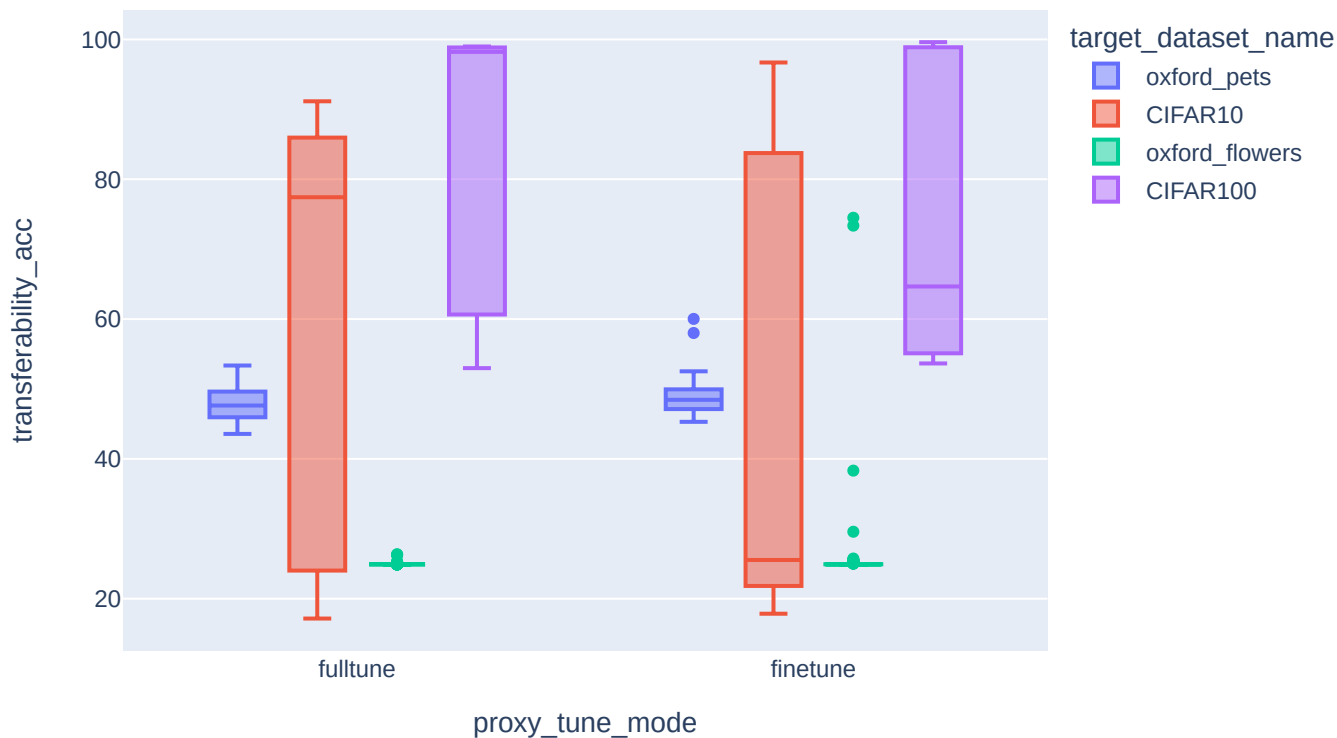

Supplement: supplementary_material [file transferability_box_converted_vissl_rn50_jigsaw_in1k_goyal19_proxy_tune_mode.pdf › adversarial_for_icml/figures/transferability_per_model_family/transferability_box_converted_vissl_rn50_jigsaw_in1k_goyal19_proxy_tune_mode.pdf]

Box plot for converted\_vissl\_rn50\_jigsaw\_in1k\_goyal19 and targeted

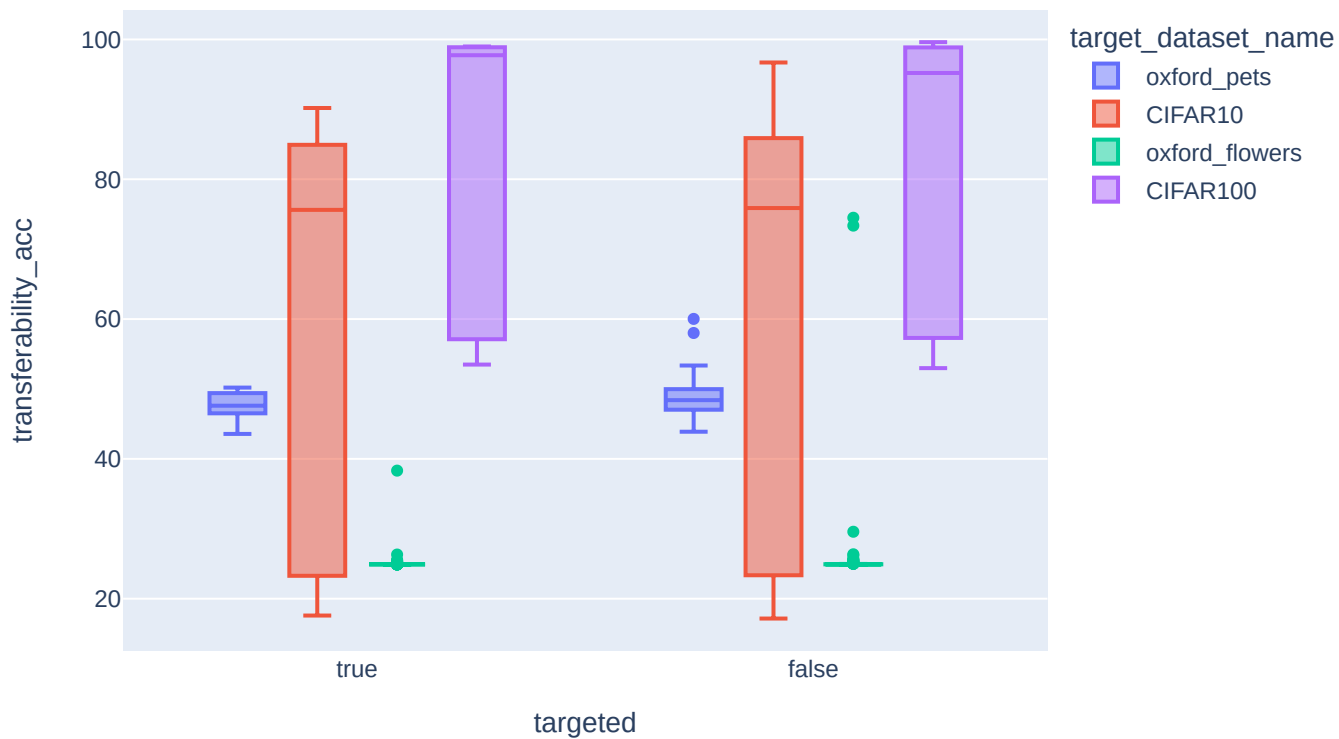

Supplement: supplementary_material [file transferability_box_converted_vissl_rn50_jigsaw_in1k_goyal19_targeted.pdf › adversarial_for_icml/figures/transferability_per_model_family/transferability_box_converted_vissl_rn50_jigsaw_in1k_goyal19_targeted.pdf]

Box plot for converted\_vissl\_rn50\_jigsaw\_in22k\_goyal19 and attack\_name

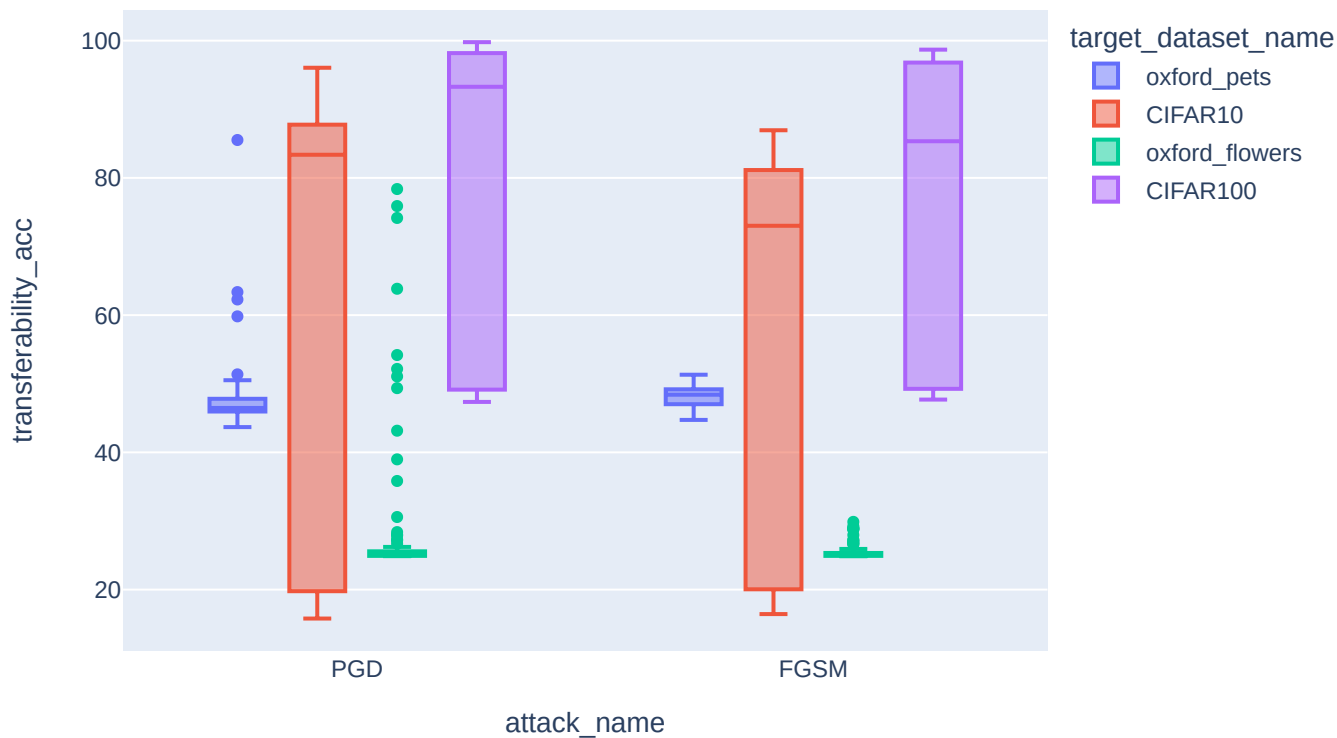

Supplement: supplementary_material [file transferability_box_converted_vissl_rn50_jigsaw_in22k_goyal19_attack_name.pdf › adversarial_for_icml/figures/transferability_per_model_family/transferability_box_converted_vissl_rn50_jigsaw_in22k_goyal19_attack_name.pdf]

Box plot for converted\_vissl\_rn50\_jigsaw\_in22k\_goyal19 and proxy\_tune\_depth

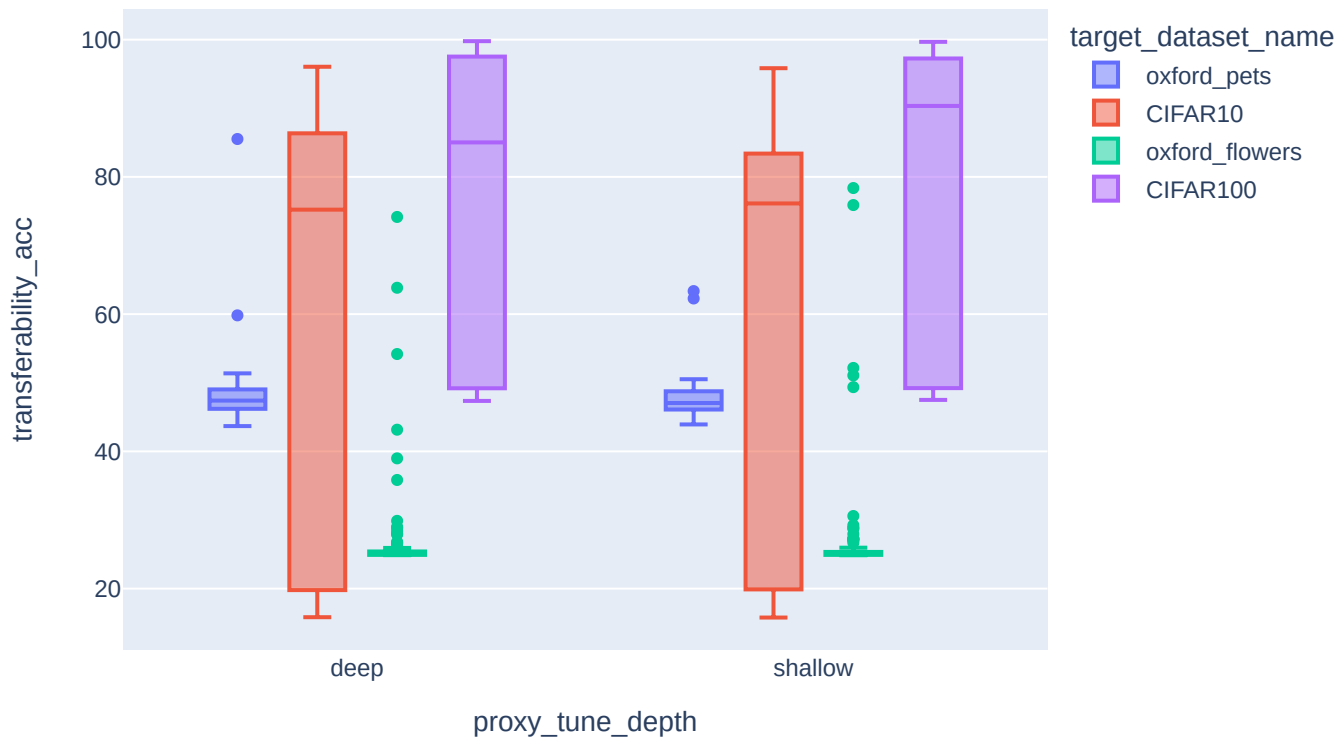

Supplement: supplementary_material [file transferability_box_converted_vissl_rn50_jigsaw_in22k_goyal19_proxy_tune_depth.pdf › adversarial_for_icml/figures/transferability_per_model_family/transferability_box_converted_vissl_rn50_jigsaw_in22k_goyal19_proxy_tune_depth.pdf]

Box plot for converted\_vissl\_rn50\_jigsaw\_in22k\_goyal19 and proxy\_tune\_mode

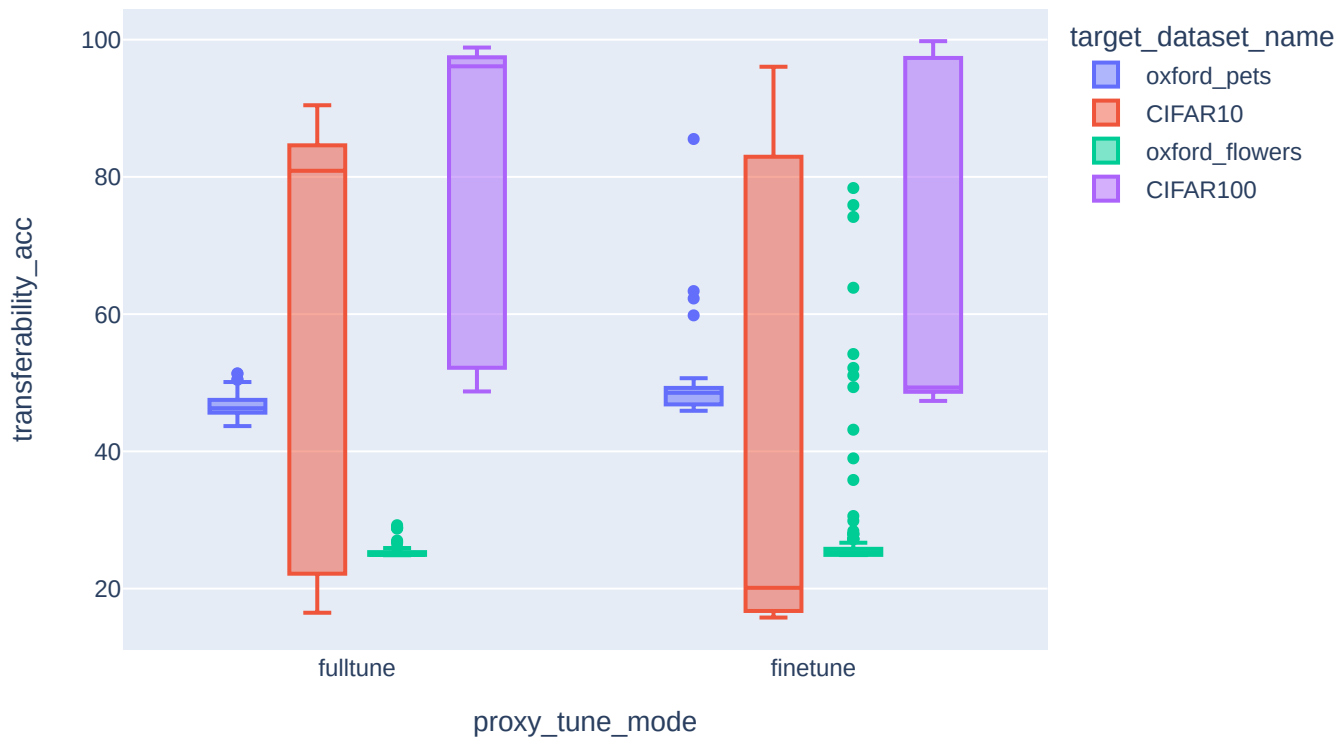

Supplement: supplementary_material [file transferability_box_converted_vissl_rn50_jigsaw_in22k_goyal19_proxy_tune_mode.pdf › adversarial_for_icml/figures/transferability_per_model_family/transferability_box_converted_vissl_rn50_jigsaw_in22k_goyal19_proxy_tune_mode.pdf]

Box plot for converted\_vissl\_rn50\_jigsaw\_in22k\_goyal19 and targeted

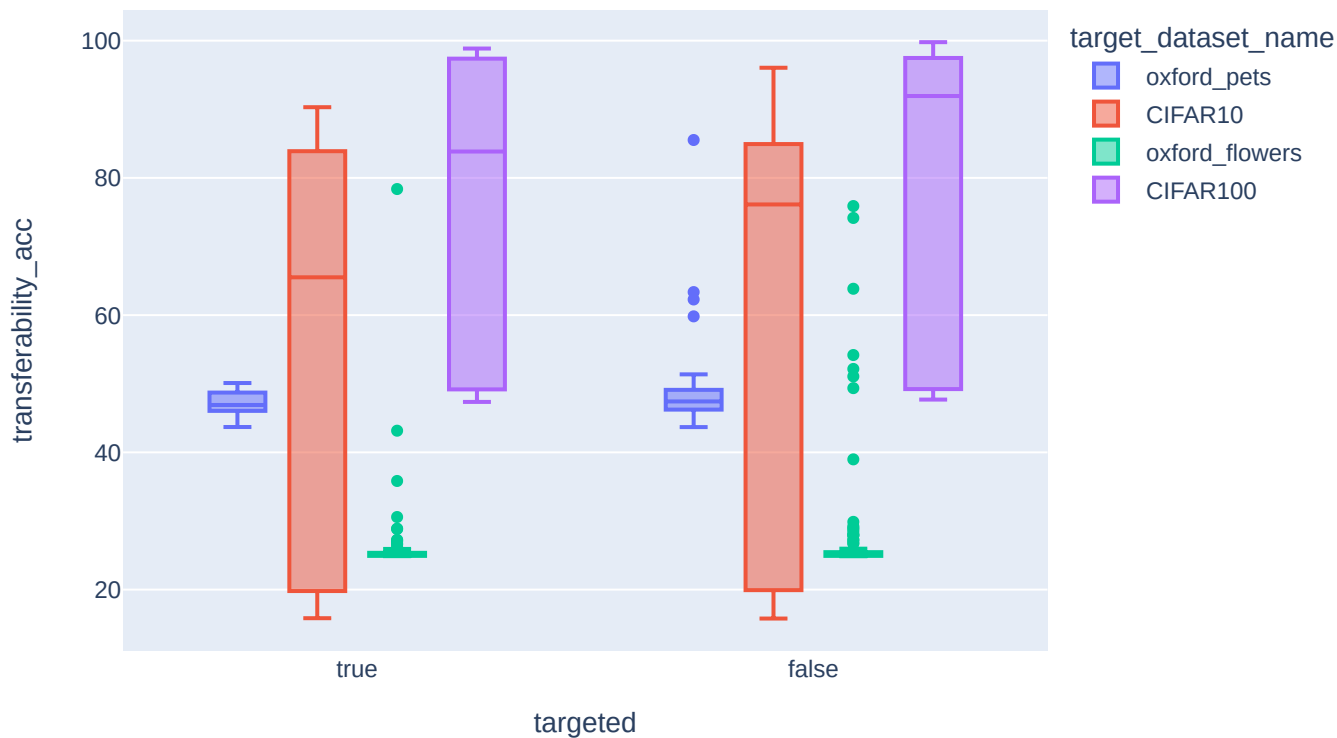

Supplement: supplementary_material [file transferability_box_converted_vissl_rn50_jigsaw_in22k_goyal19_targeted.pdf › adversarial_for_icml/figures/transferability_per_model_family/transferability_box_converted_vissl_rn50_jigsaw_in22k_goyal19_targeted.pdf]

Box plot for converted\_vissl\_rn50\_rotnet\_16kclusters\_in1k\_ep105 and attack\_name

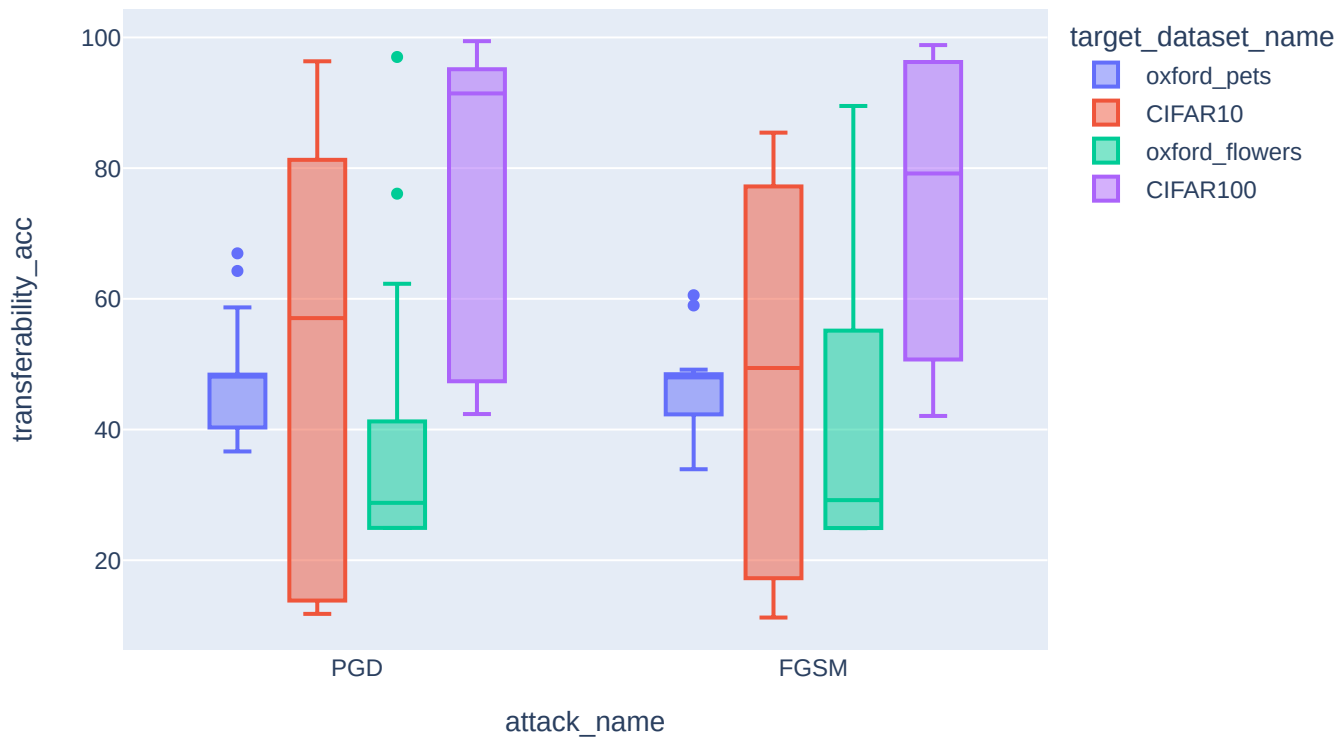

Supplement: supplementary_material [file transferability_box_converted_vissl_rn50_rotnet_16kclusters_in1k_ep105_attack_name.pdf › adversarial_for_icml/figures/transferability_per_model_family/transferability_box_converted_vissl_rn50_rotnet_16kclusters_in1k_ep105_attack_name.pdf]

Box plot for converted\_vissl\_rn50\_rotnet\_16kclusters\_in1k\_ep105 and proxy\_tune\_depth

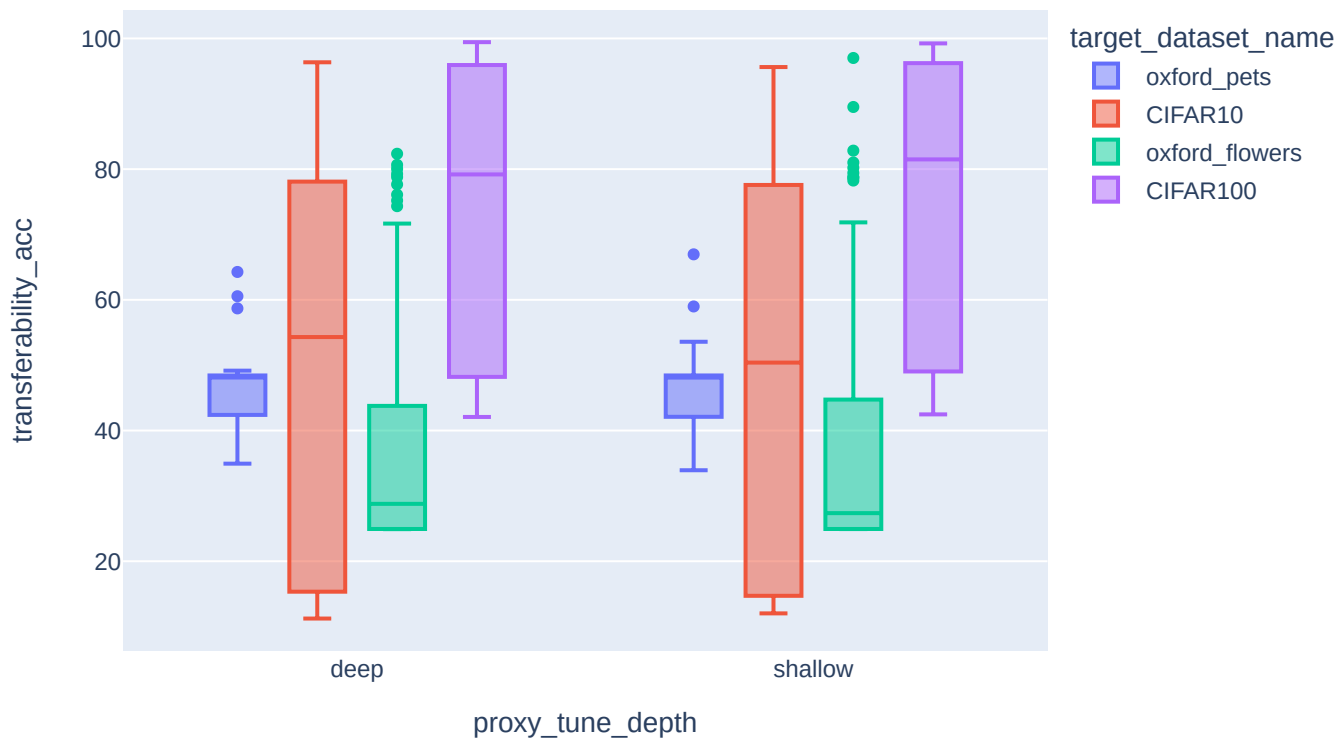

Supplement: supplementary_material [file transferability_box_converted_vissl_rn50_rotnet_16kclusters_in1k_ep105_proxy_tune_depth.pdf › adversarial_for_icml/figures/transferability_per_model_family/transferability_box_converted_vissl_rn50_rotnet_16kclusters_in1k_ep105_proxy_tune_depth.pdf]

Box plot for converted\_vissl\_rn50\_rotnet\_16kclusters\_in1k\_ep105 and proxy\_tune\_mode

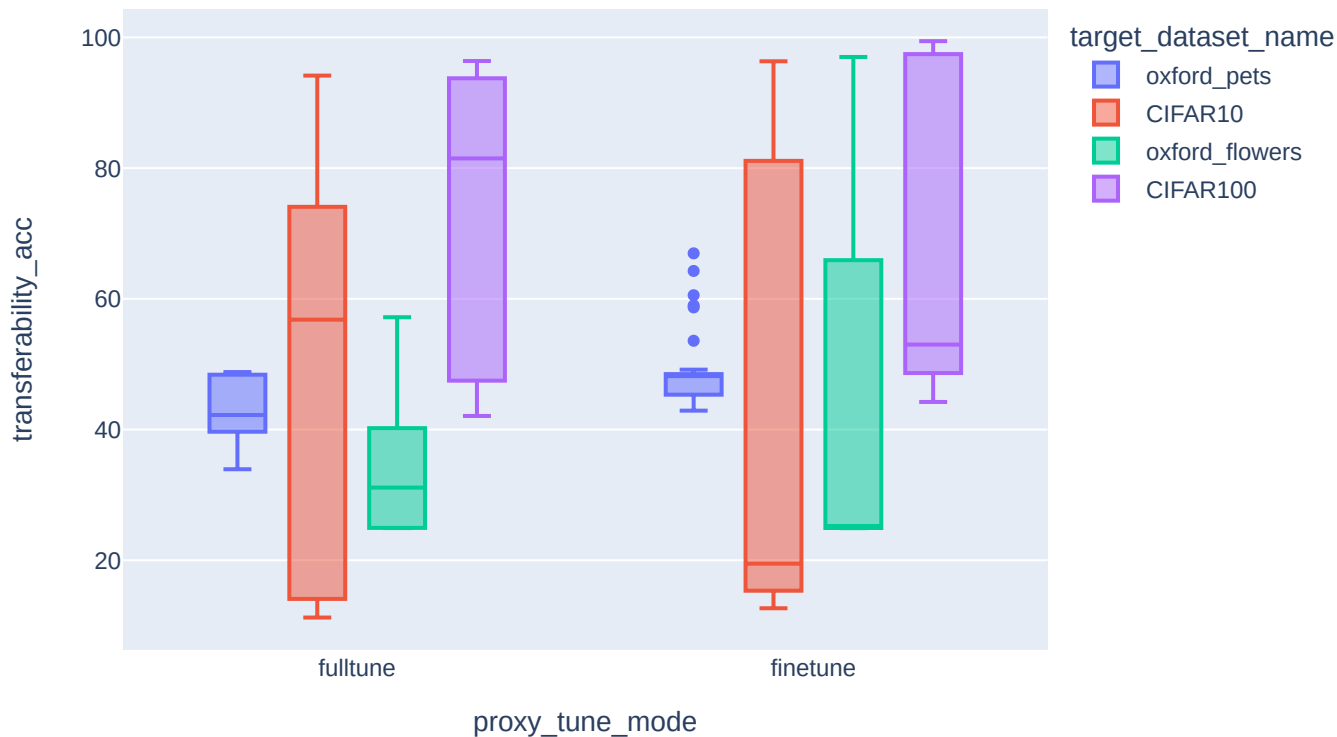

Supplement: supplementary_material [file transferability_box_converted_vissl_rn50_rotnet_16kclusters_in1k_ep105_proxy_tune_mode.pdf › adversarial_for_icml/figures/transferability_per_model_family/transferability_box_converted_vissl_rn50_rotnet_16kclusters_in1k_ep105_proxy_tune_mode.pdf]

Box plot for converted\_vissl\_rn50\_rotnet\_16kclusters\_in1k\_ep105 and targeted

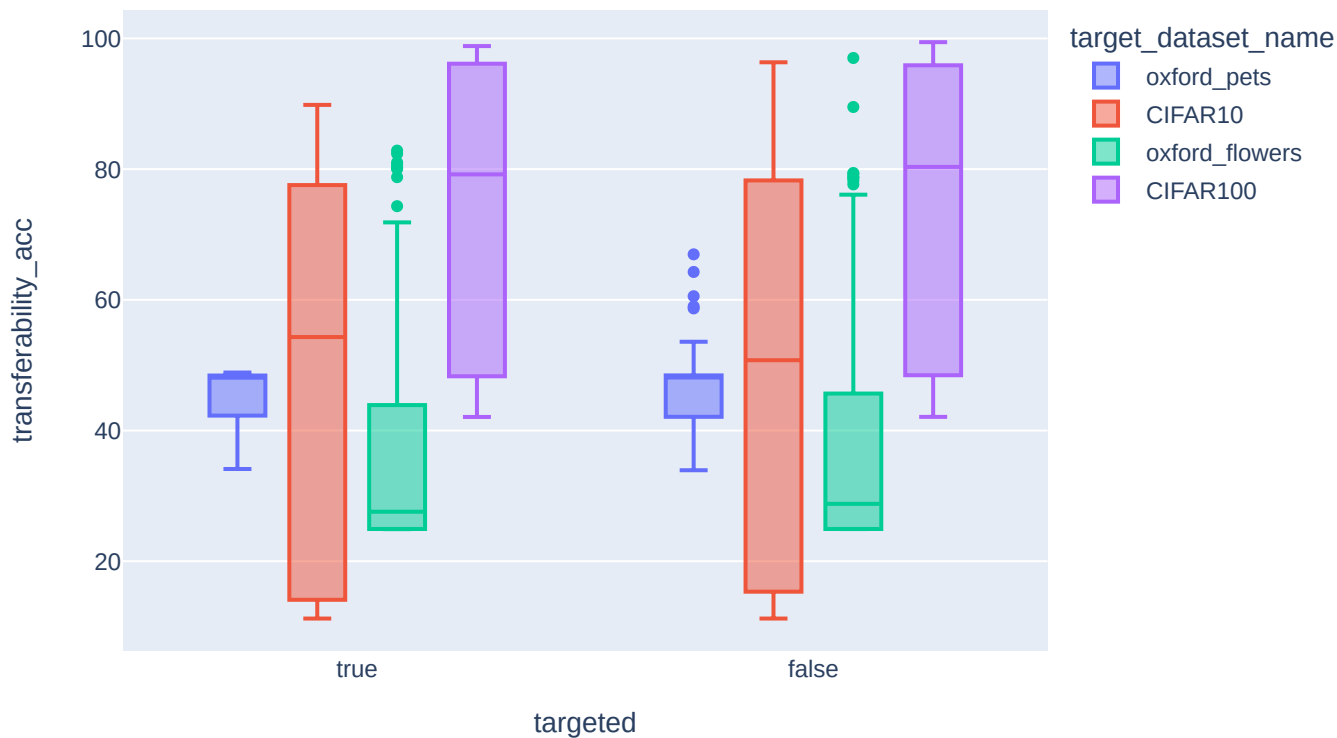

Supplement: supplementary_material [file transferability_box_converted_vissl_rn50_rotnet_16kclusters_in1k_ep105_targeted.pdf › adversarial_for_icml/figures/transferability_per_model_family/transferability_box_converted_vissl_rn50_rotnet_16kclusters_in1k_ep105_targeted.pdf]

Box plot for deepclusterv2\_800ep\_pretrain and attack\_name

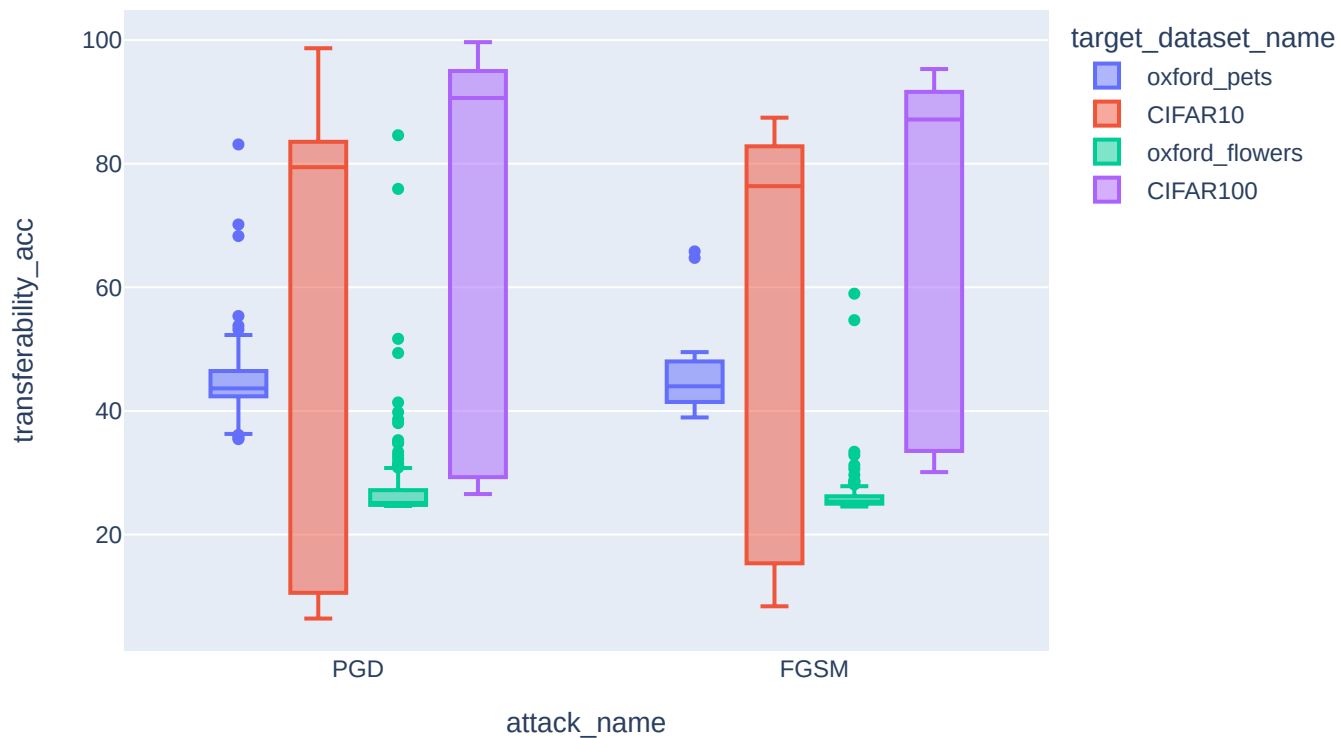

Supplement: supplementary_material [file transferability_box_deepclusterv2_800ep_pretrain_attack_name.pdf › adversarial_for_icml/figures/transferability_per_model_family/transferability_box_deepclusterv2_800ep_pretrain_attack_name.pdf]

Box plot for deepclusterv2\_800ep\_pretrain and proxy\_tune\_depth

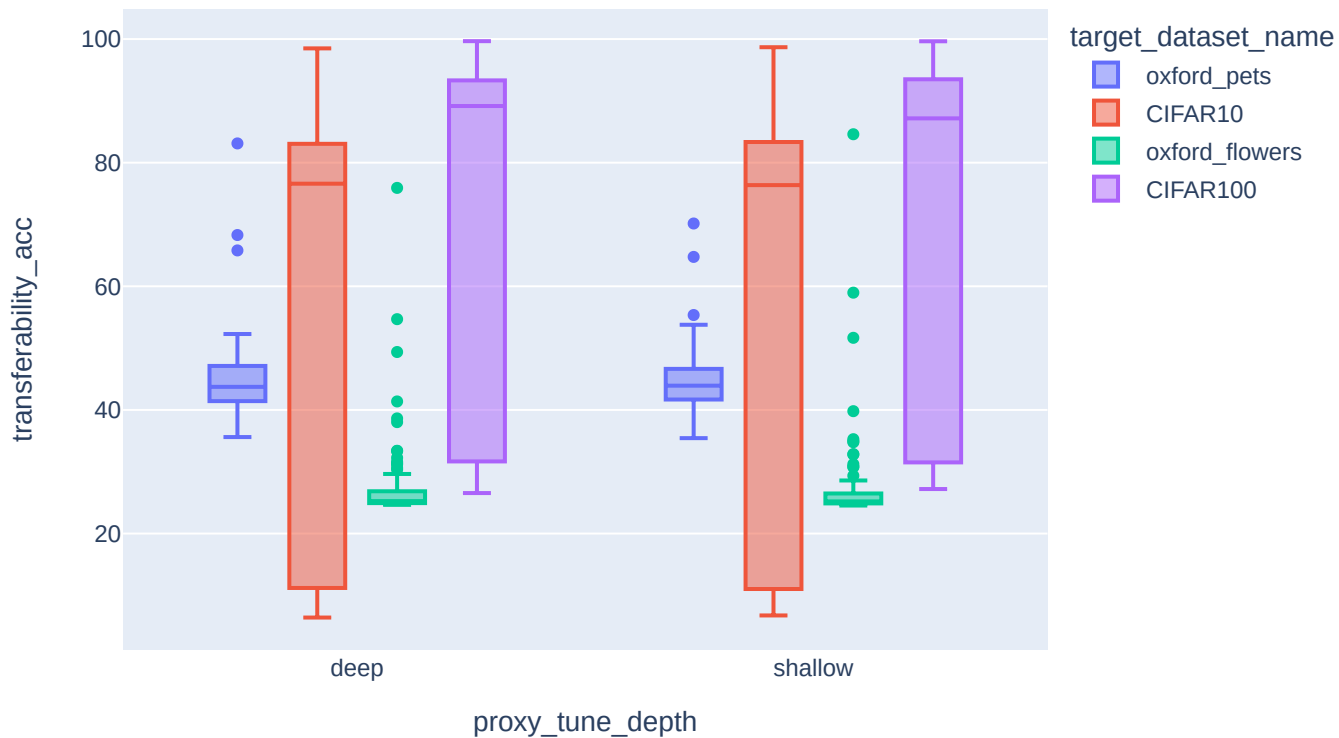

Supplement: supplementary_material [file transferability_box_deepclusterv2_800ep_pretrain_proxy_tune_depth.pdf › adversarial_for_icml/figures/transferability_per_model_family/transferability_box_deepclusterv2_800ep_pretrain_proxy_tune_depth.pdf]

Box plot for deepclusterv2\_800ep\_pretrain and proxy\_tune\_mode

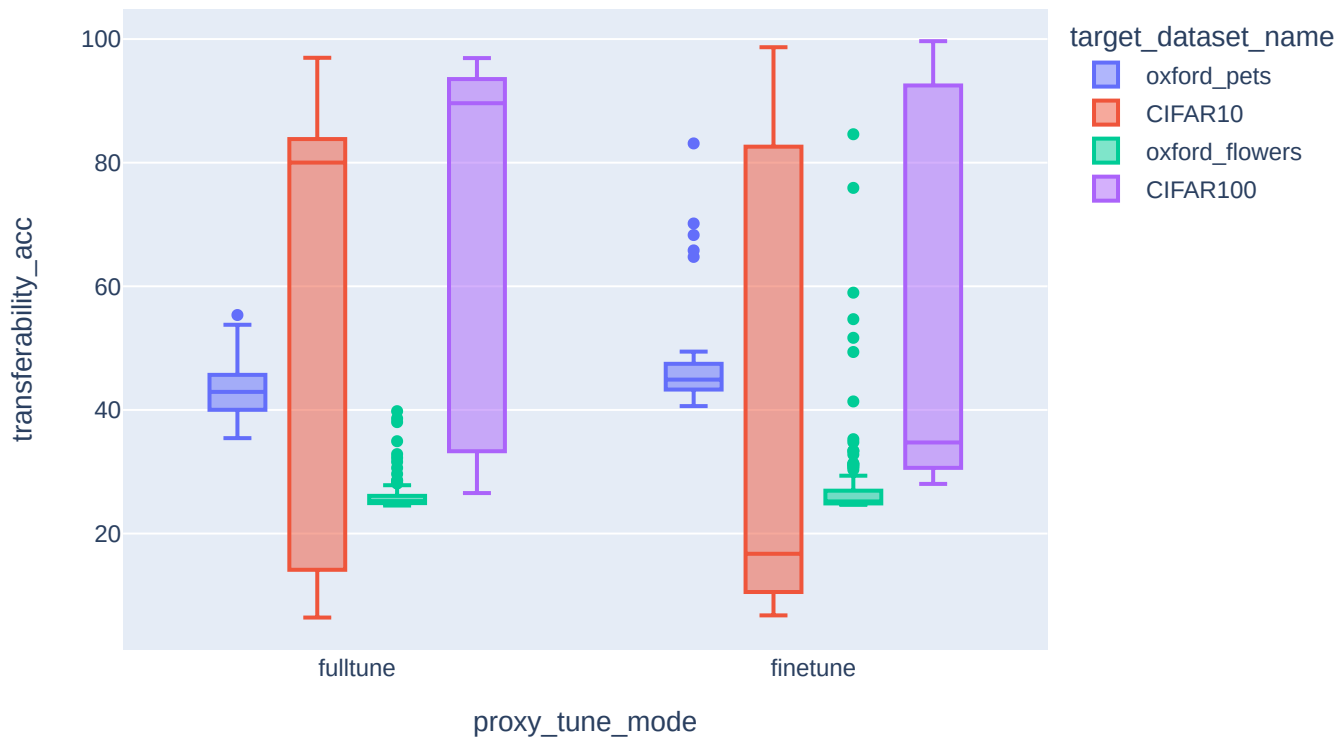

Supplement: supplementary_material [file transferability_box_deepclusterv2_800ep_pretrain_proxy_tune_mode.pdf › adversarial_for_icml/figures/transferability_per_model_family/transferability_box_deepclusterv2_800ep_pretrain_proxy_tune_mode.pdf]
