# Supplementary material (part 2 of 2)
Source: ML conference proceedings conference paper supplement (https://openreview.net/forum?id=h3pdqoIk1b)

Box plot for deepclusterv2\_800ep\_pretrain and targeted

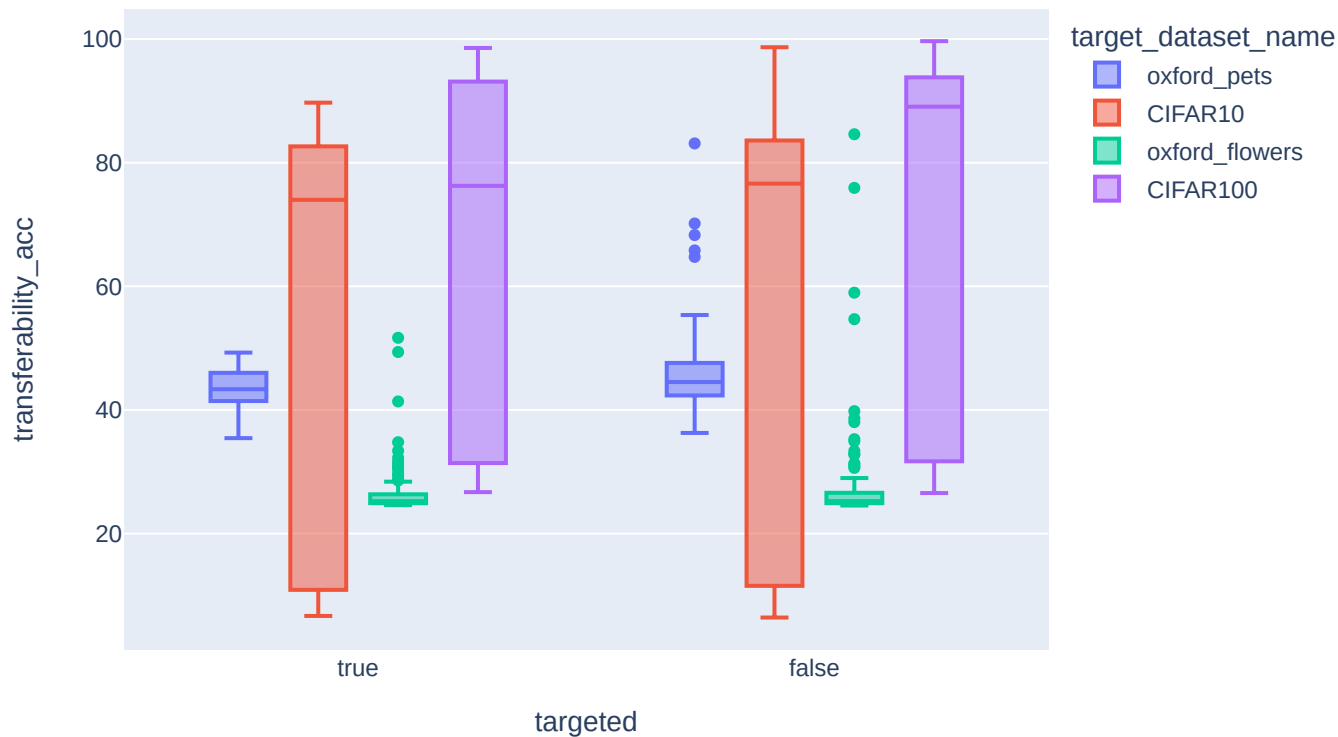

Supplement: supplementary_material [file transferability_box_deepclusterv2_800ep_pretrain_targeted.pdf › adversarial_for_icml/figures/transferability_per_model_family/transferability_box_deepclusterv2_800ep_pretrain_targeted.pdf]

Box plot for dino\_300ep\_deitsmall16 and attack\_name

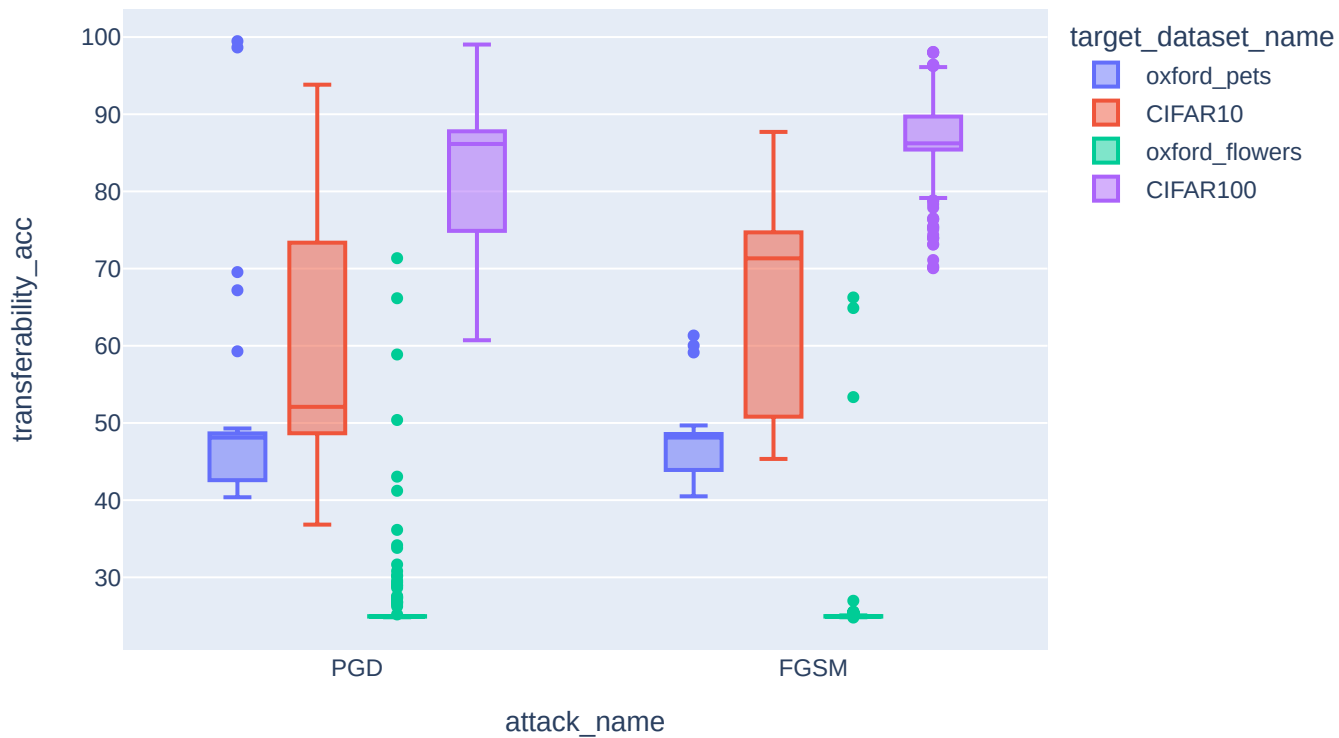

Supplement: supplementary_material [file transferability_box_dino_300ep_deitsmall16_attack_name.pdf › adversarial_for_icml/figures/transferability_per_model_family/transferability_box_dino_300ep_deitsmall16_attack_name.pdf]

Box plot for dino\_300ep\_deitsmall16 and proxy\_tune\_depth

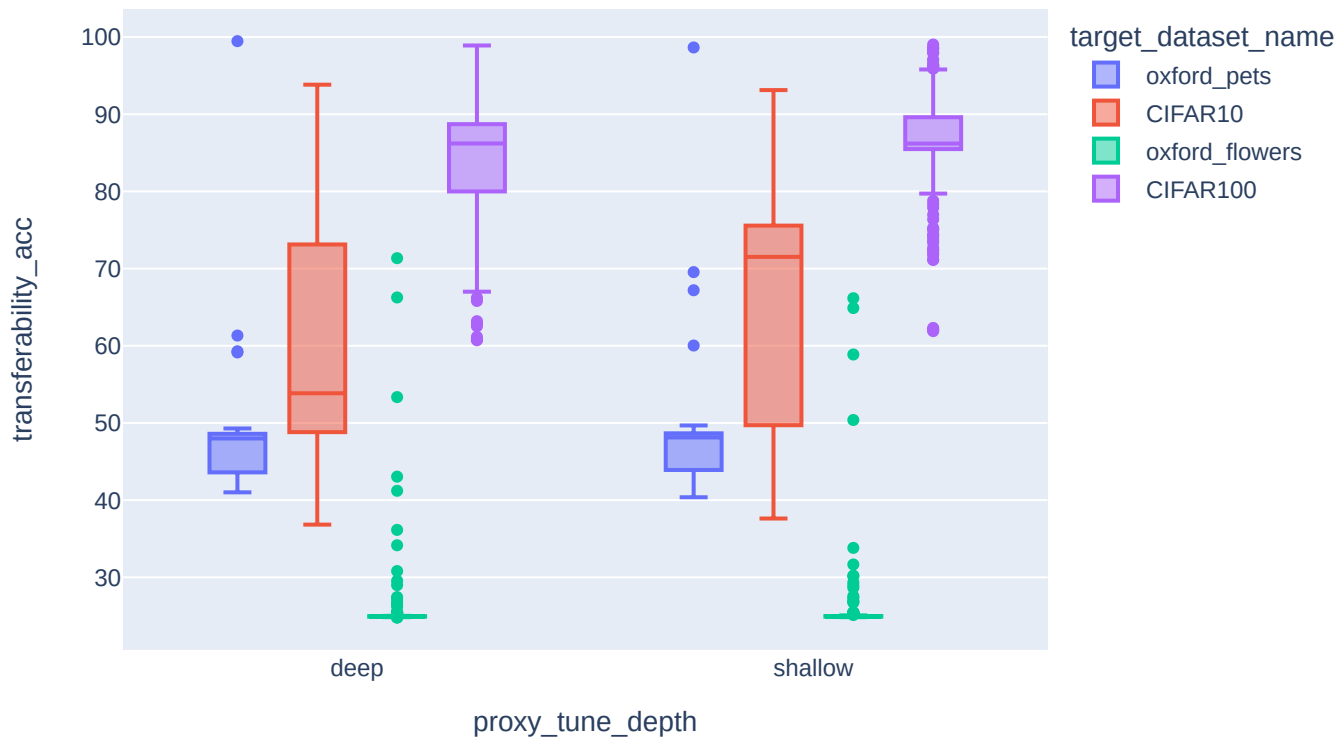

Supplement: supplementary_material [file transferability_box_dino_300ep_deitsmall16_proxy_tune_depth.pdf › adversarial_for_icml/figures/transferability_per_model_family/transferability_box_dino_300ep_deitsmall16_proxy_tune_depth.pdf]

Box plot for dino\_300ep\_deitsmall16 and proxy\_tune\_mode

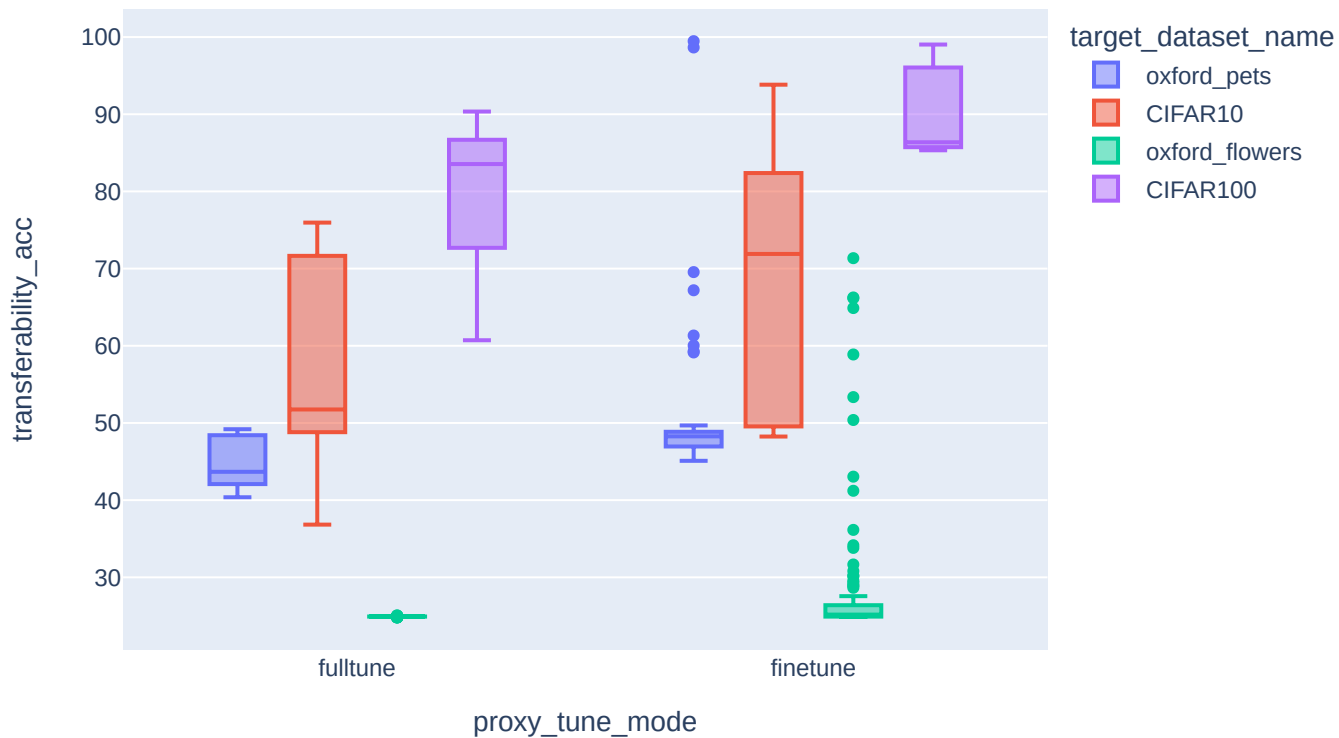

Supplement: supplementary_material [file transferability_box_dino_300ep_deitsmall16_proxy_tune_mode.pdf › adversarial_for_icml/figures/transferability_per_model_family/transferability_box_dino_300ep_deitsmall16_proxy_tune_mode.pdf]

Box plot for dino\_300ep\_deitsmall16 and targeted

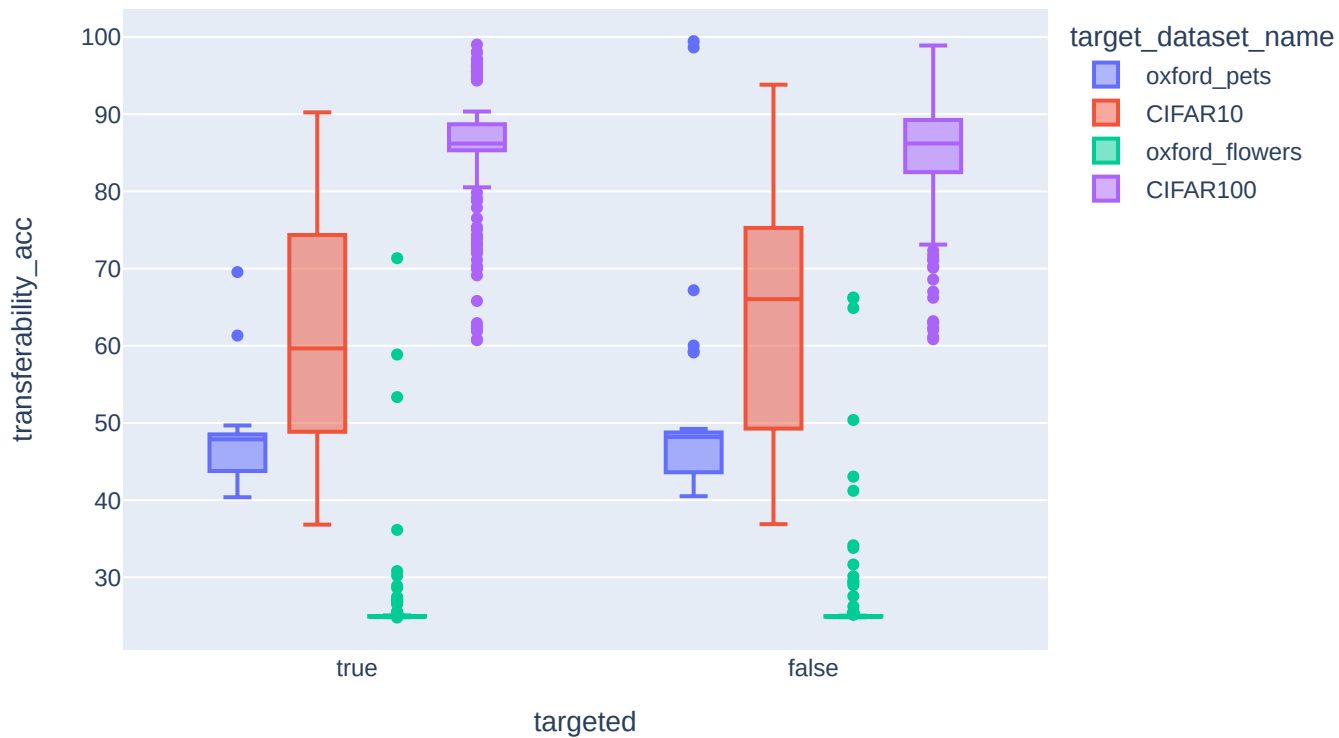

Supplement: supplementary_material [file transferability_box_dino_300ep_deitsmall16_targeted.pdf › adversarial_for_icml/figures/transferability_per_model_family/transferability_box_dino_300ep_deitsmall16_targeted.pdf]

Box plot for dino\_300ep\_xcitsmall16 and attack\_name

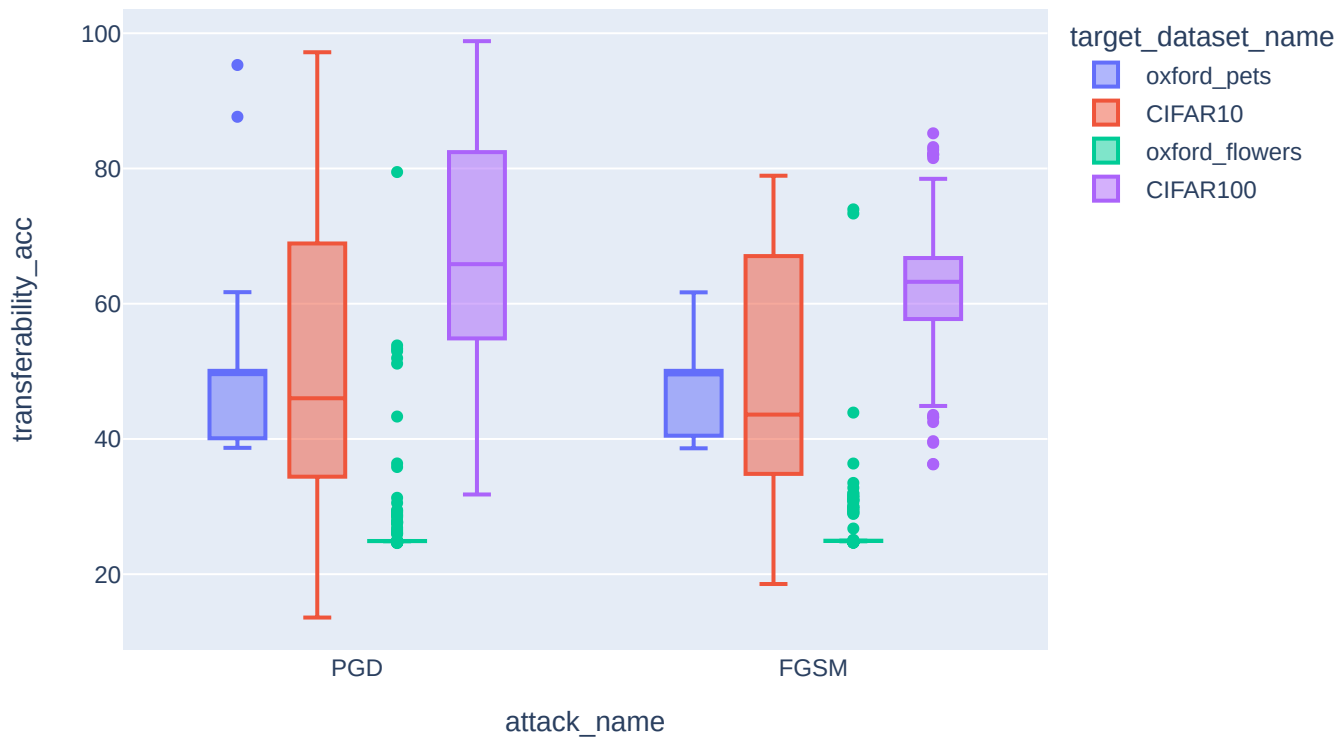

Supplement: supplementary_material [file transferability_box_dino_300ep_xcitsmall16_attack_name.pdf › adversarial_for_icml/figures/transferability_per_model_family/transferability_box_dino_300ep_xcitsmall16_attack_name.pdf]

Box plot for dino\_300ep\_xcitsmall16 and proxy\_tune\_depth

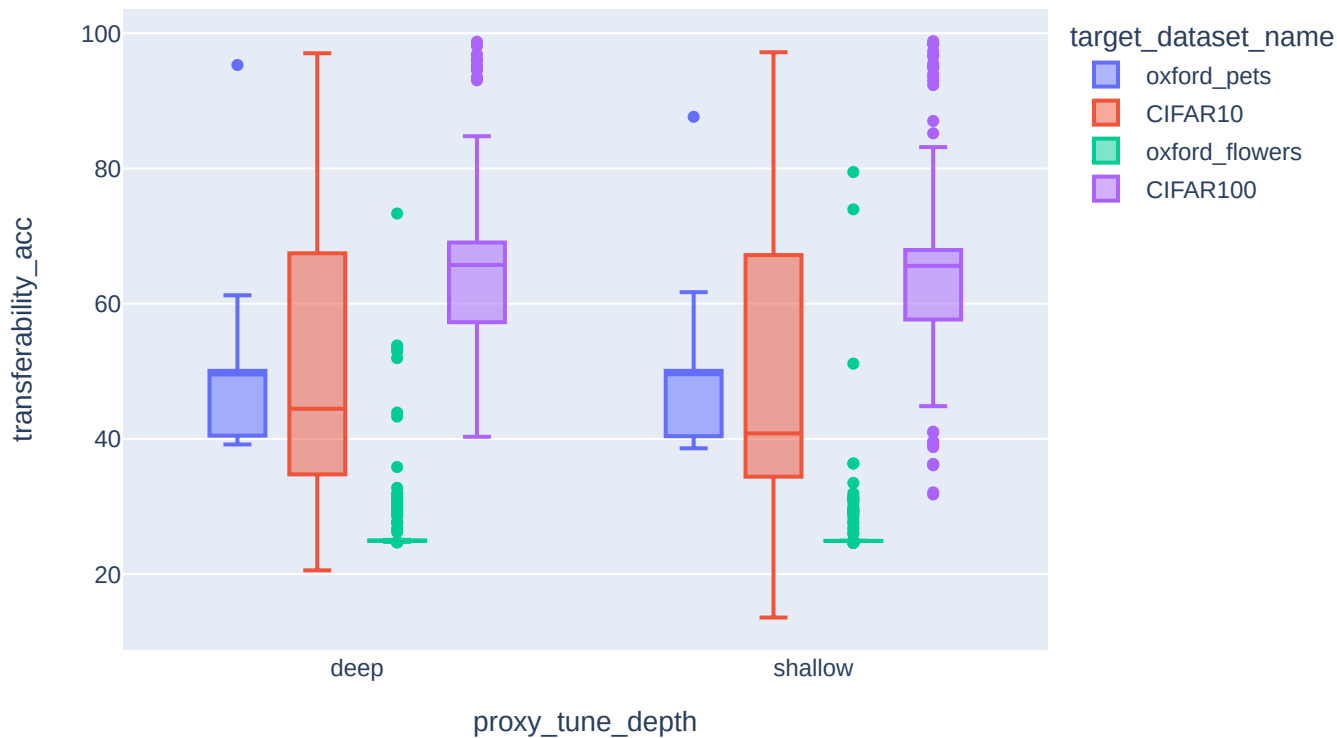

Supplement: supplementary_material [file transferability_box_dino_300ep_xcitsmall16_proxy_tune_depth.pdf › adversarial_for_icml/figures/transferability_per_model_family/transferability_box_dino_300ep_xcitsmall16_proxy_tune_depth.pdf]

Box plot for dino\_300ep\_xcitsmall16 and proxy\_tune\_mode

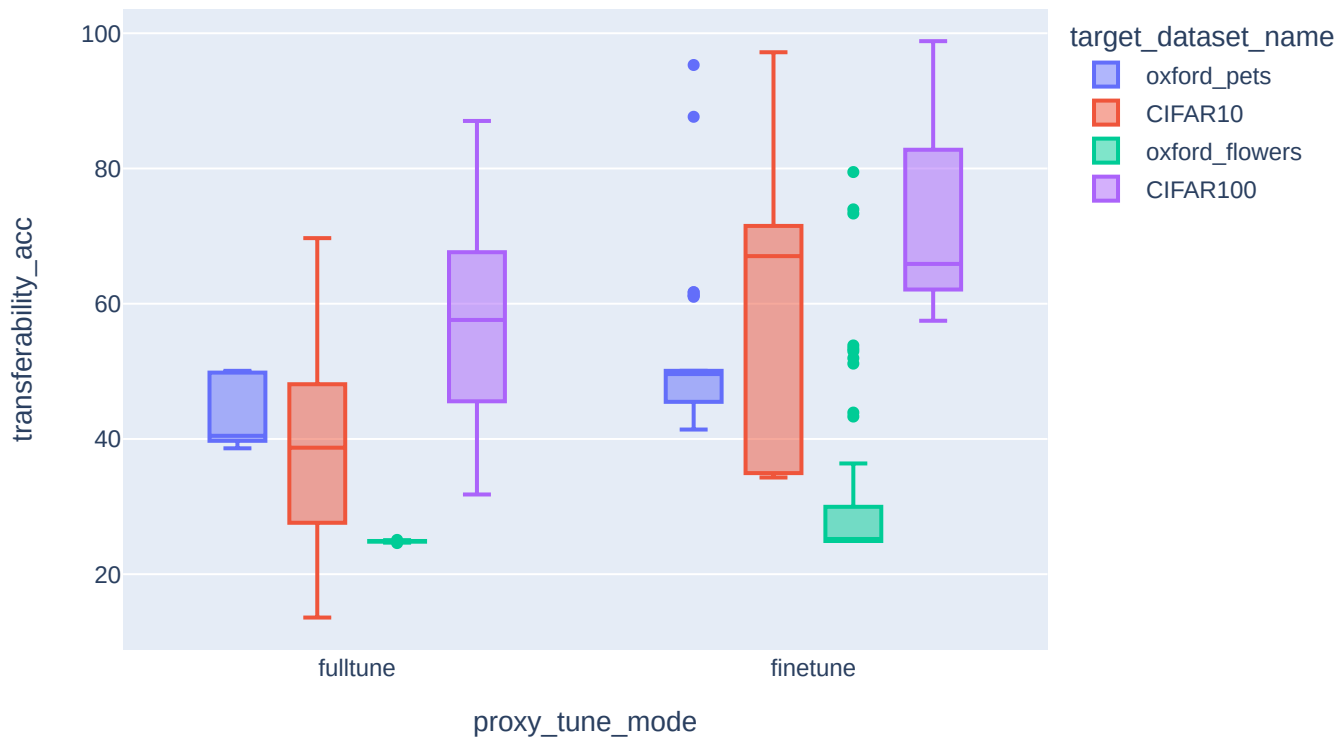

Supplement: supplementary_material [file transferability_box_dino_300ep_xcitsmall16_proxy_tune_mode.pdf › adversarial_for_icml/figures/transferability_per_model_family/transferability_box_dino_300ep_xcitsmall16_proxy_tune_mode.pdf]

Box plot for dino\_300ep\_xcitsmall16 and targeted

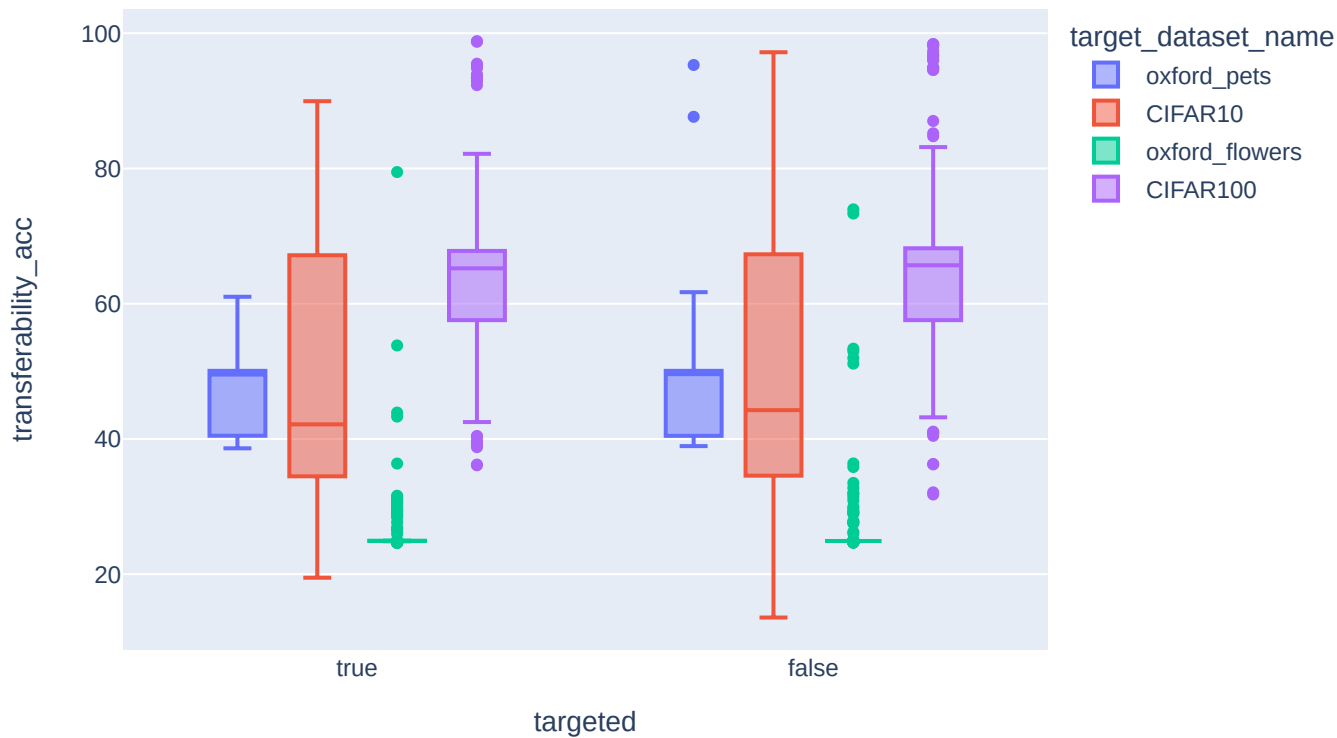

Supplement: supplementary_material [file transferability_box_dino_300ep_xcitsmall16_targeted.pdf › adversarial_for_icml/figures/transferability_per_model_family/transferability_box_dino_300ep_xcitsmall16_targeted.pdf]

Box plot for jigsaw\_rn50\_in1k\_ep105\_perm2k\_jigsaw\_8gpu\_resnet\_20\_07\_20 and attac

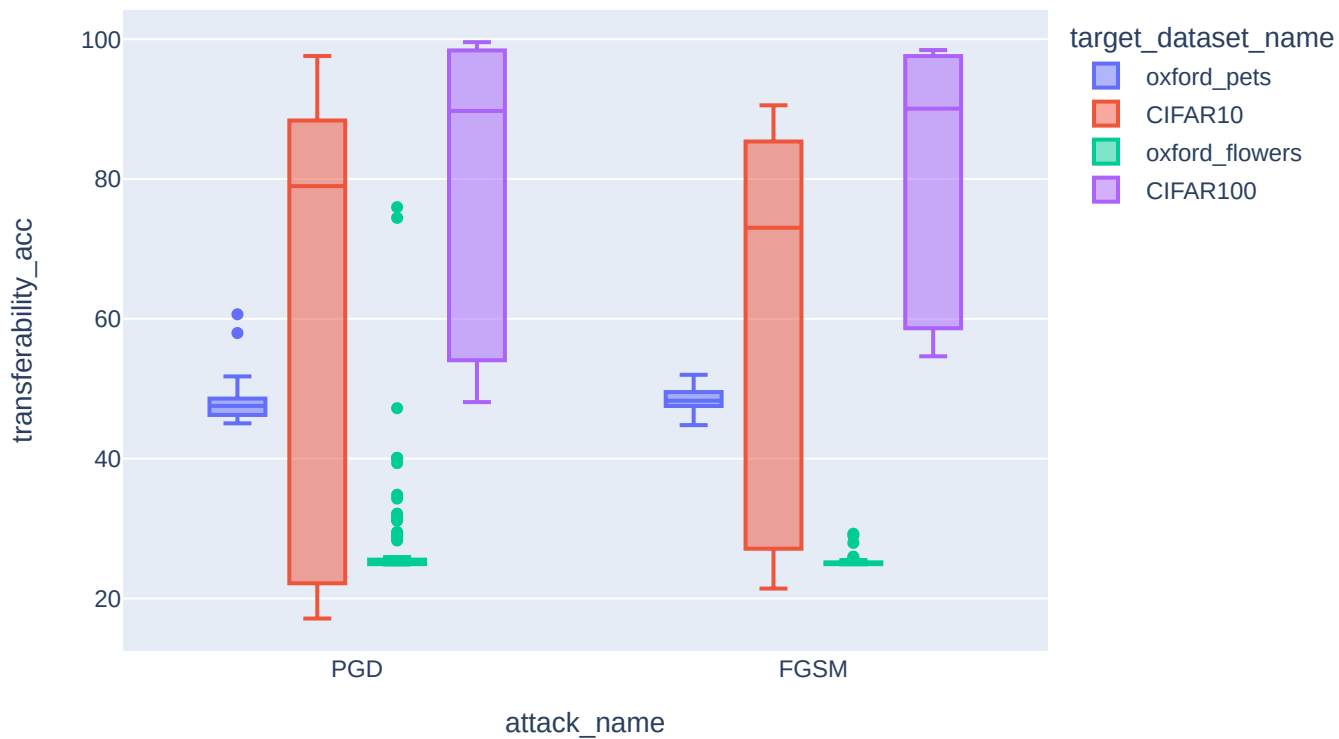

Supplement: supplementary_material [file transferability_box_jigsaw_rn50_in1k_ep105_perm2k_jigsaw_8gpu_resnet_20_07_20_attack_name.pdf › adversarial_for_icml/figures/transferability_per_model_family/transferability_box_jigsaw_rn50_in1k_ep105_perm2k_jigsaw_8gpu_resnet_20_07_20_attack_name.pdf]

Box plot for jigsaw\_rn50\_in1k\_ep105\_perm2k\_jigsaw\_8gpu\_resnet\_20\_07\_20 and proxy

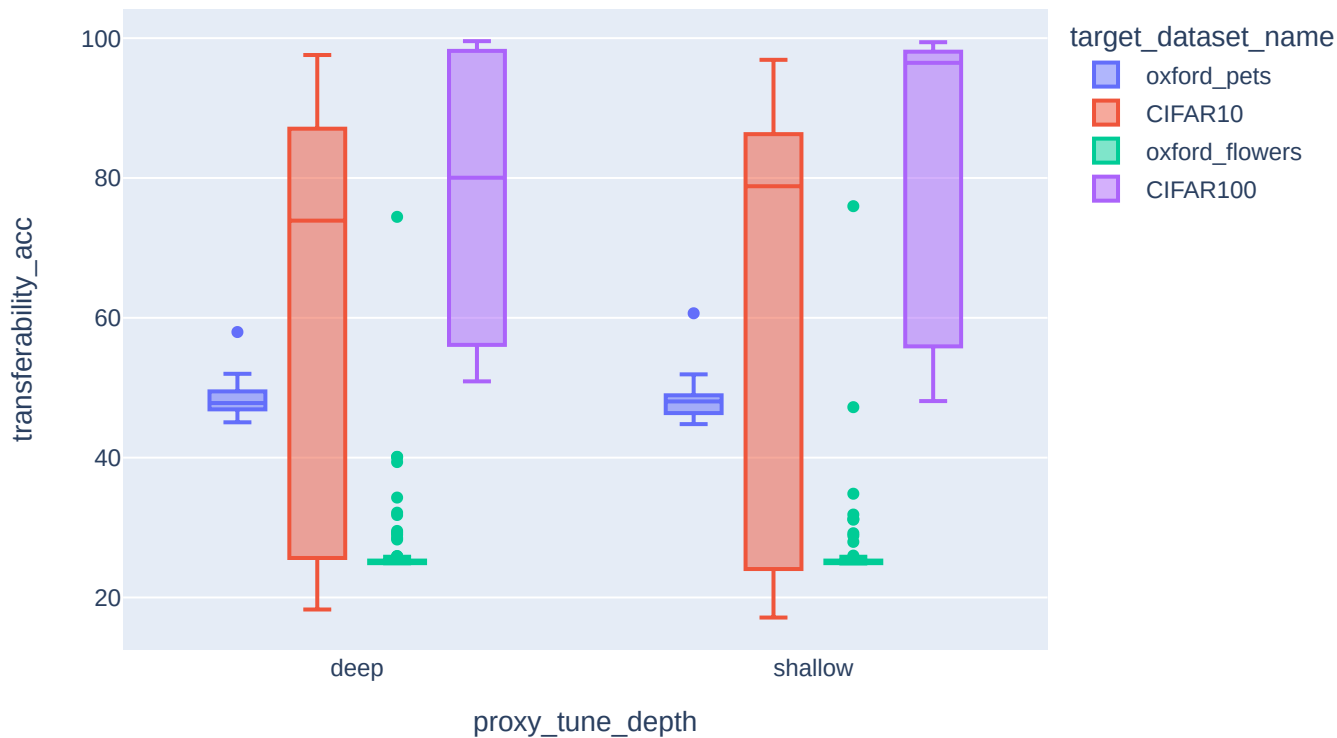

Supplement: supplementary_material [file transferability_box_jigsaw_rn50_in1k_ep105_perm2k_jigsaw_8gpu_resnet_20_07_20_proxy_tune_depth.pdf › adversarial_for_icml/figures/transferability_per_model_family/transferability_box_jigsaw_rn50_in1k_ep105_perm2k_jigsaw_8gpu_resnet_20_07_20_proxy_tune_depth.pdf]

Box plot for jigsaw\_rn50\_in1k\_ep105\_perm2k\_jigsaw\_8gpu\_resnet\_20\_07\_20 and proxy

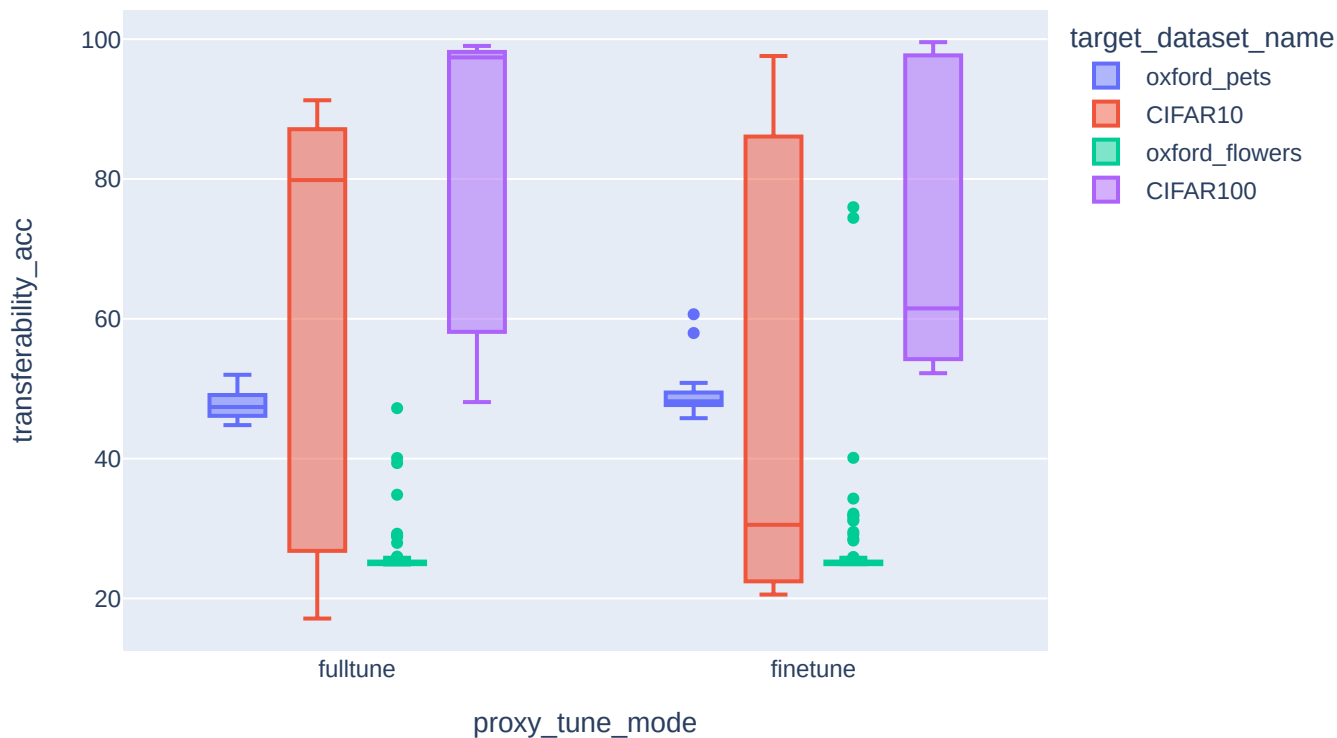

Supplement: supplementary_material [file transferability_box_jigsaw_rn50_in1k_ep105_perm2k_jigsaw_8gpu_resnet_20_07_20_proxy_tune_mode.pdf › adversarial_for_icml/figures/transferability_per_model_family/transferability_box_jigsaw_rn50_in1k_ep105_perm2k_jigsaw_8gpu_resnet_20_07_20_proxy_tune_mode.pdf]

Box plot for jigsaw\_rn50\_in1k\_ep105\_perm2k\_jigsaw\_8gpu\_resnet\_20\_07\_20 and target

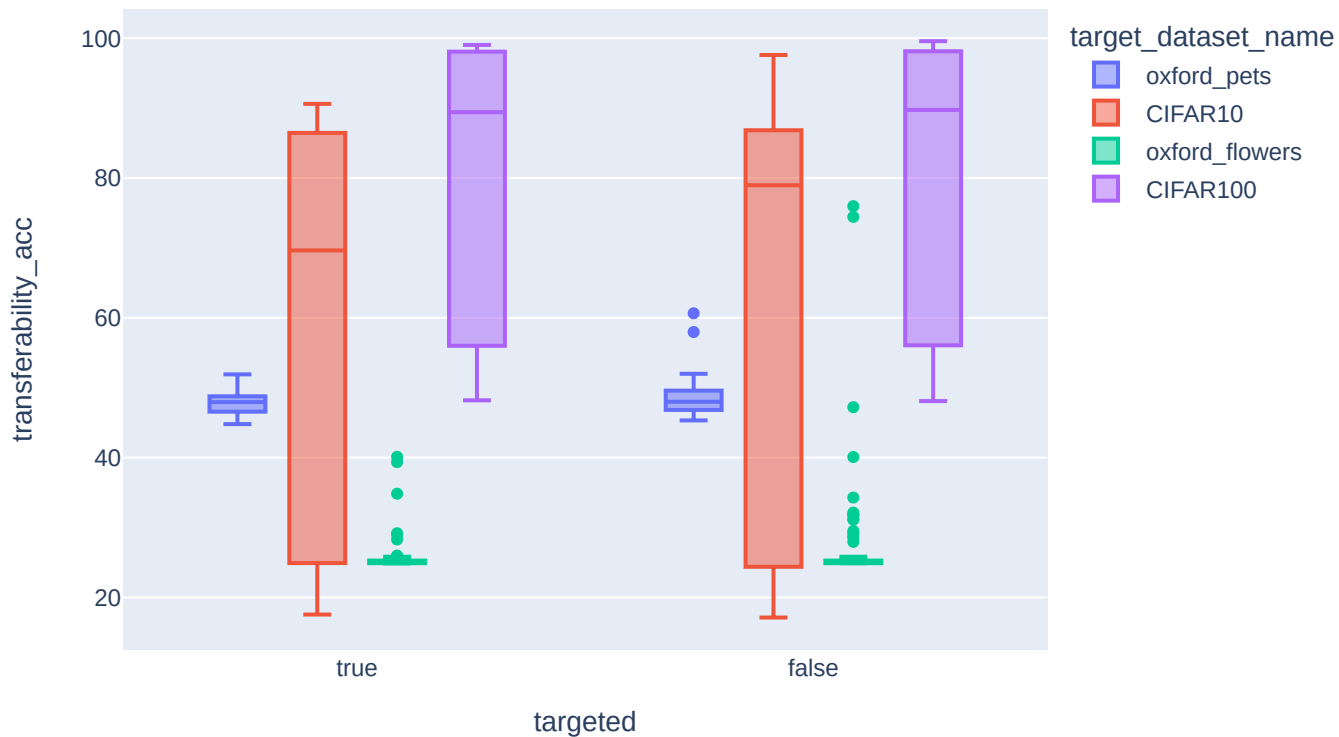

Supplement: supplementary_material [file transferability_box_jigsaw_rn50_in1k_ep105_perm2k_jigsaw_8gpu_resnet_20_07_20_targeted.pdf › adversarial_for_icml/figures/transferability_per_model_family/transferability_box_jigsaw_rn50_in1k_ep105_perm2k_jigsaw_8gpu_resnet_20_07_20_targeted.pdf]

Box plot for npid\_pp and attack\_name

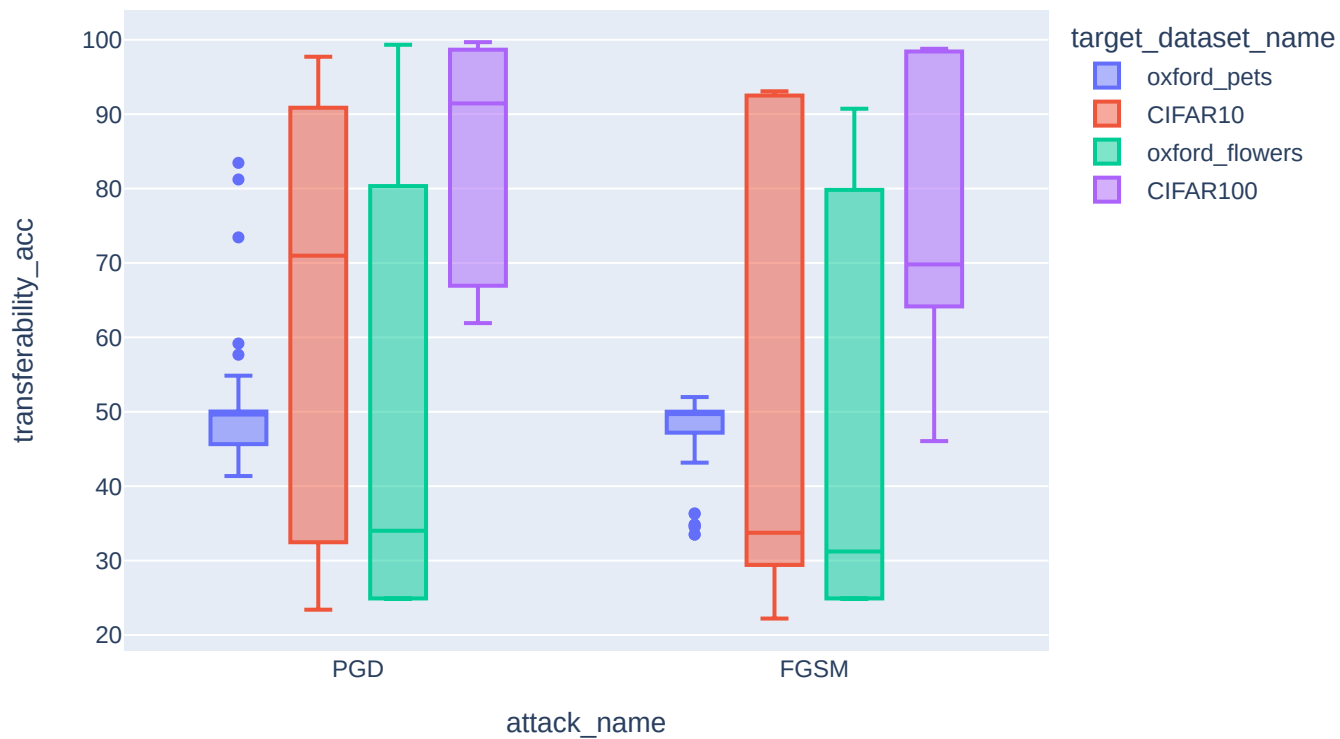

Supplement: supplementary_material [file transferability_box_npid_pp_attack_name.pdf › adversarial_for_icml/figures/transferability_per_model_family/transferability_box_npid_pp_attack_name.pdf]

Box plot for npid\_pp and proxy\_tune\_depth

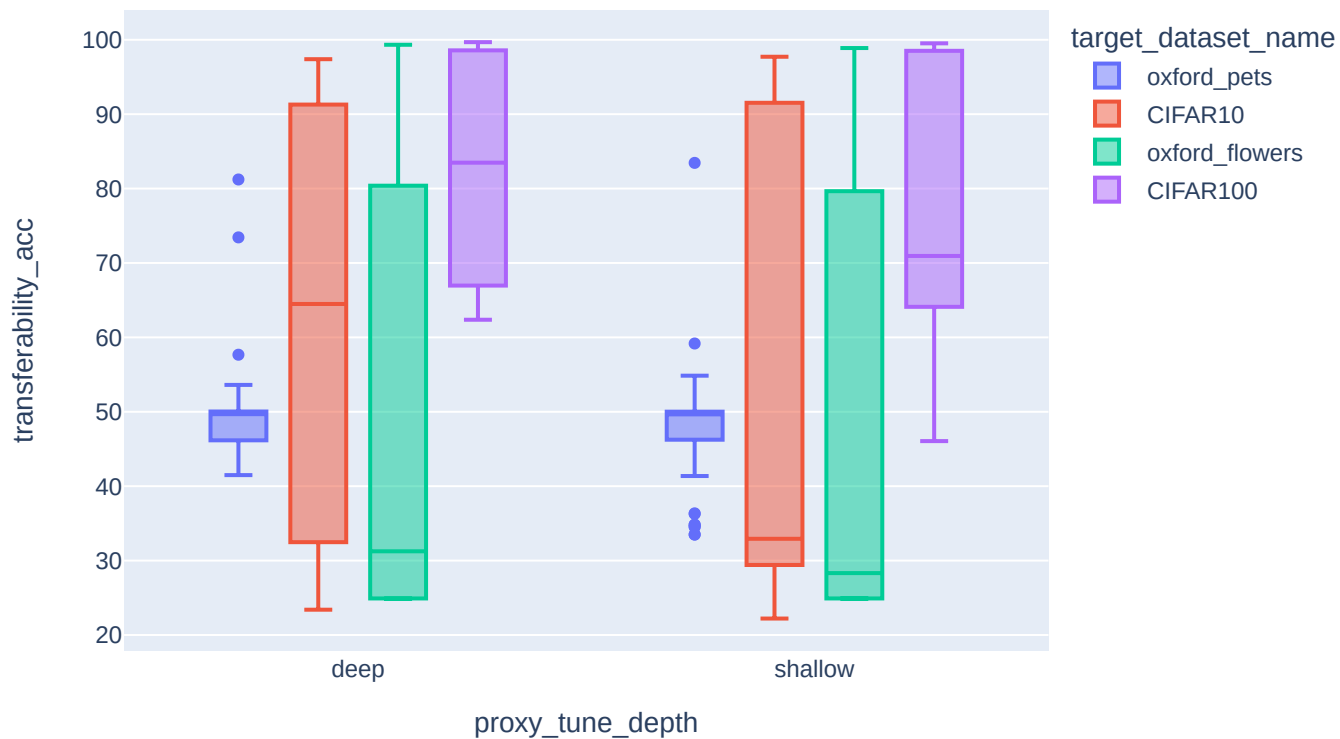

Supplement: supplementary_material [file transferability_box_npid_pp_proxy_tune_depth.pdf › adversarial_for_icml/figures/transferability_per_model_family/transferability_box_npid_pp_proxy_tune_depth.pdf]

Box plot for npid\_pp and proxy\_tune\_mode

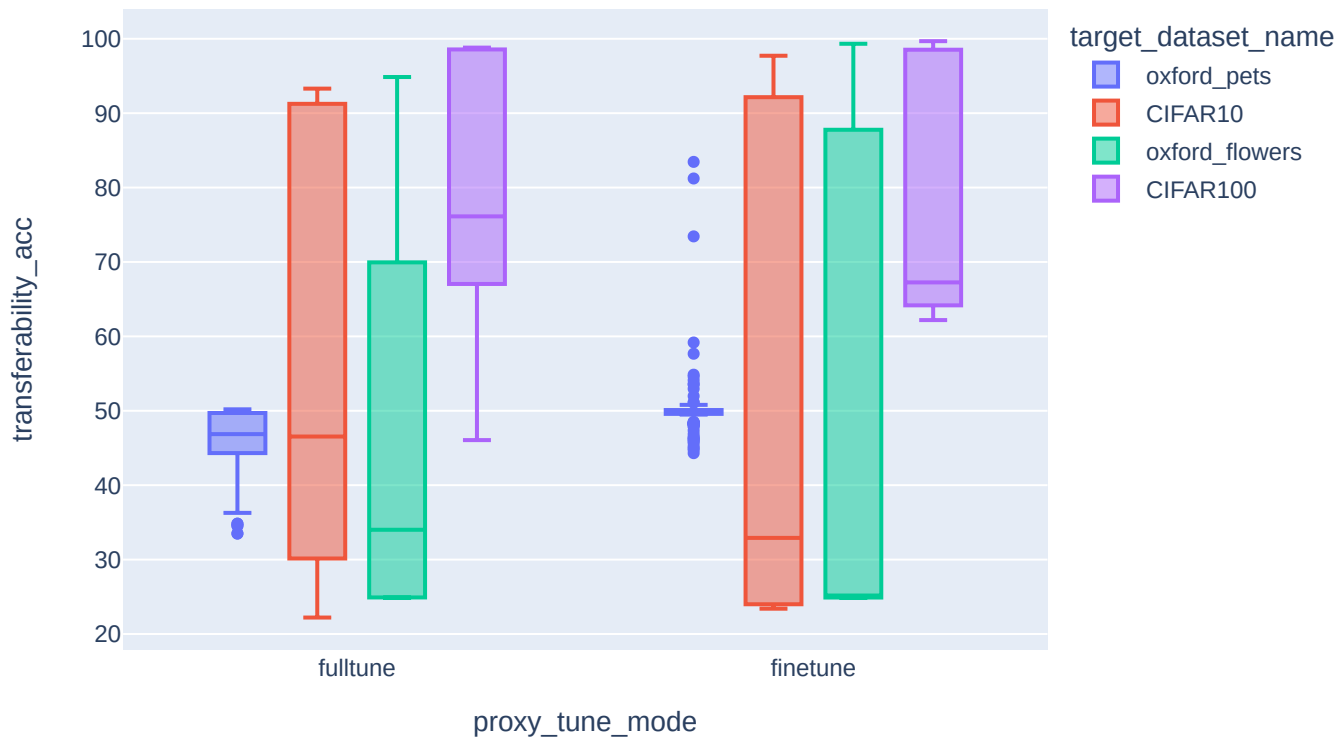

Supplement: supplementary_material [file transferability_box_npid_pp_proxy_tune_mode.pdf › adversarial_for_icml/figures/transferability_per_model_family/transferability_box_npid_pp_proxy_tune_mode.pdf]

Box plot for npid\_pp and targeted

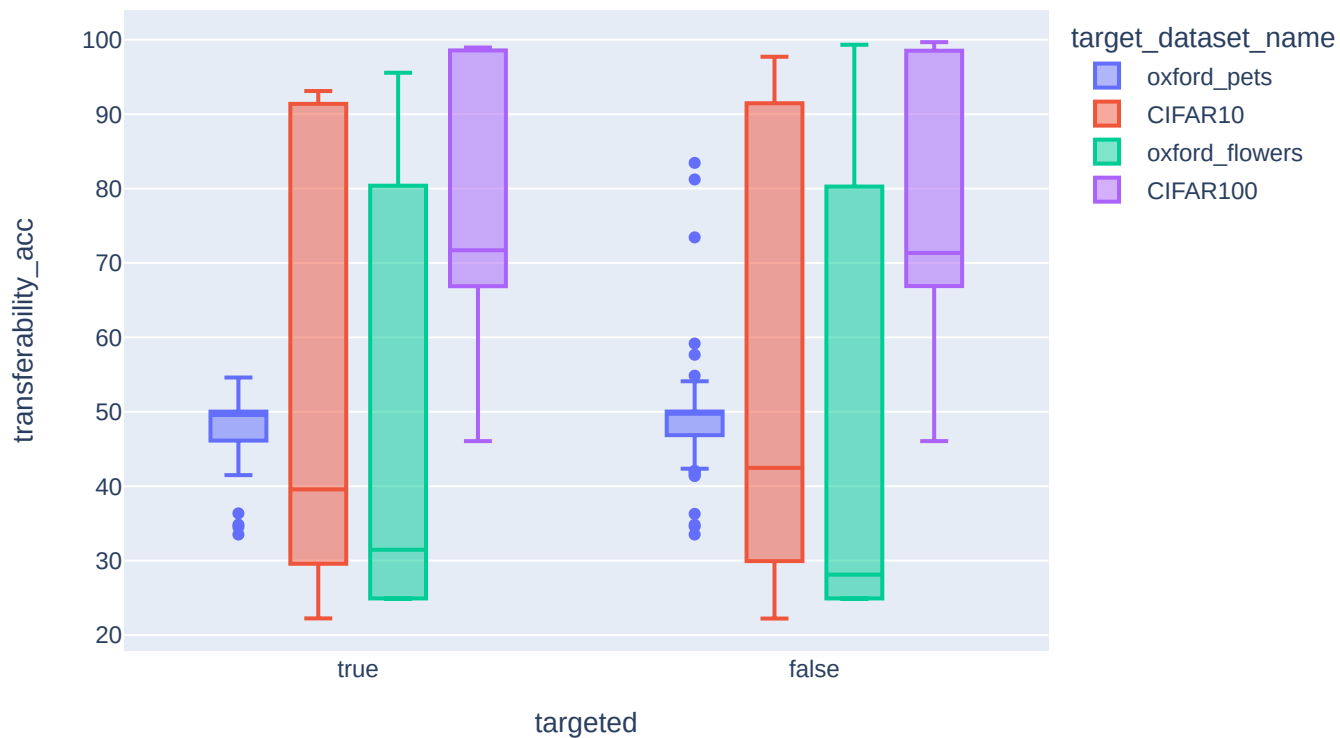

Supplement: supplementary_material [file transferability_box_npid_pp_targeted.pdf › adversarial_for_icml/figures/transferability_per_model_family/transferability_box_npid_pp_targeted.pdf]

Box plot for pirl\_jigsaw\_4node\_pirl\_jigsaw\_4node\_resnet\_22\_07\_20 and attack\_name

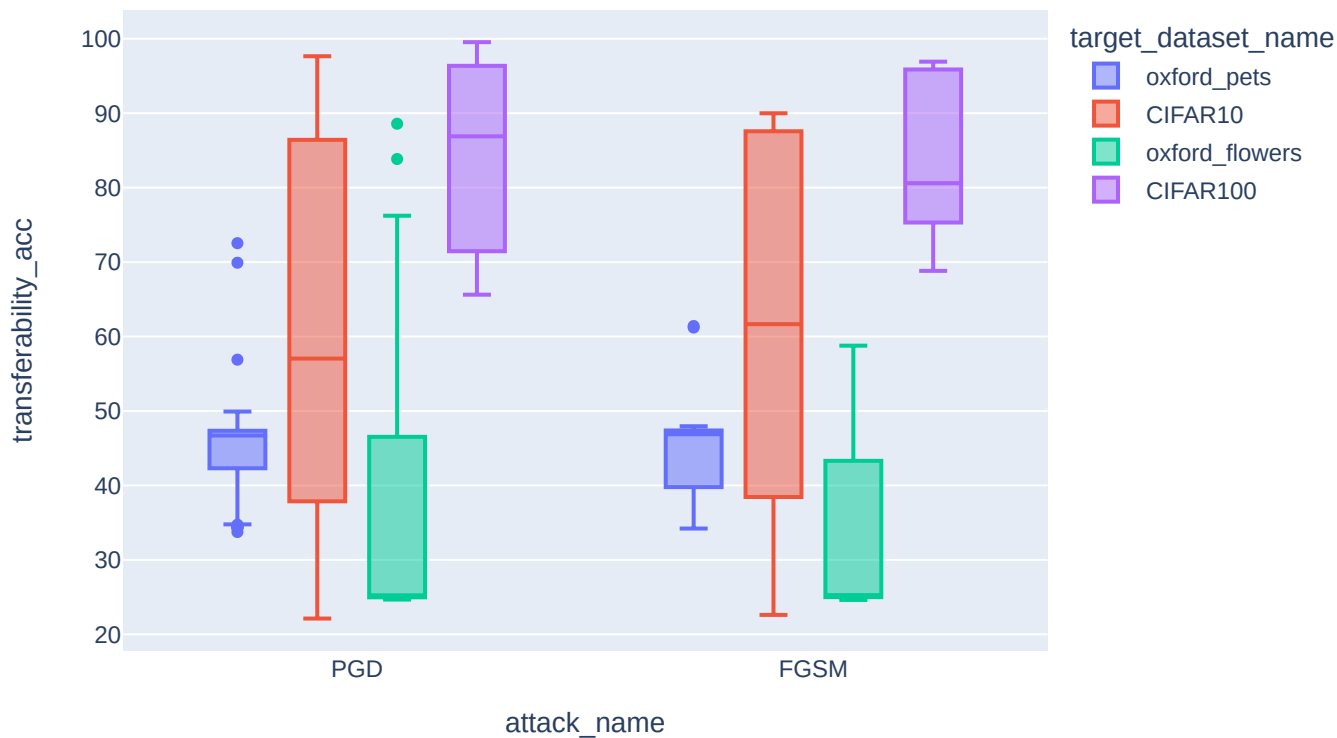

Supplement: supplementary_material [file transferability_box_pirl_jigsaw_4node_pirl_jigsaw_4node_resnet_22_07_20_attack_name.pdf › adversarial_for_icml/figures/transferability_per_model_family/transferability_box_pirl_jigsaw_4node_pirl_jigsaw_4node_resnet_22_07_20_attack_name.pdf]

Box plot for pirl\_jigsaw\_4node\_pirl\_jigsaw\_4node\_resnet\_22\_07\_20 and proxy\_tune\_de

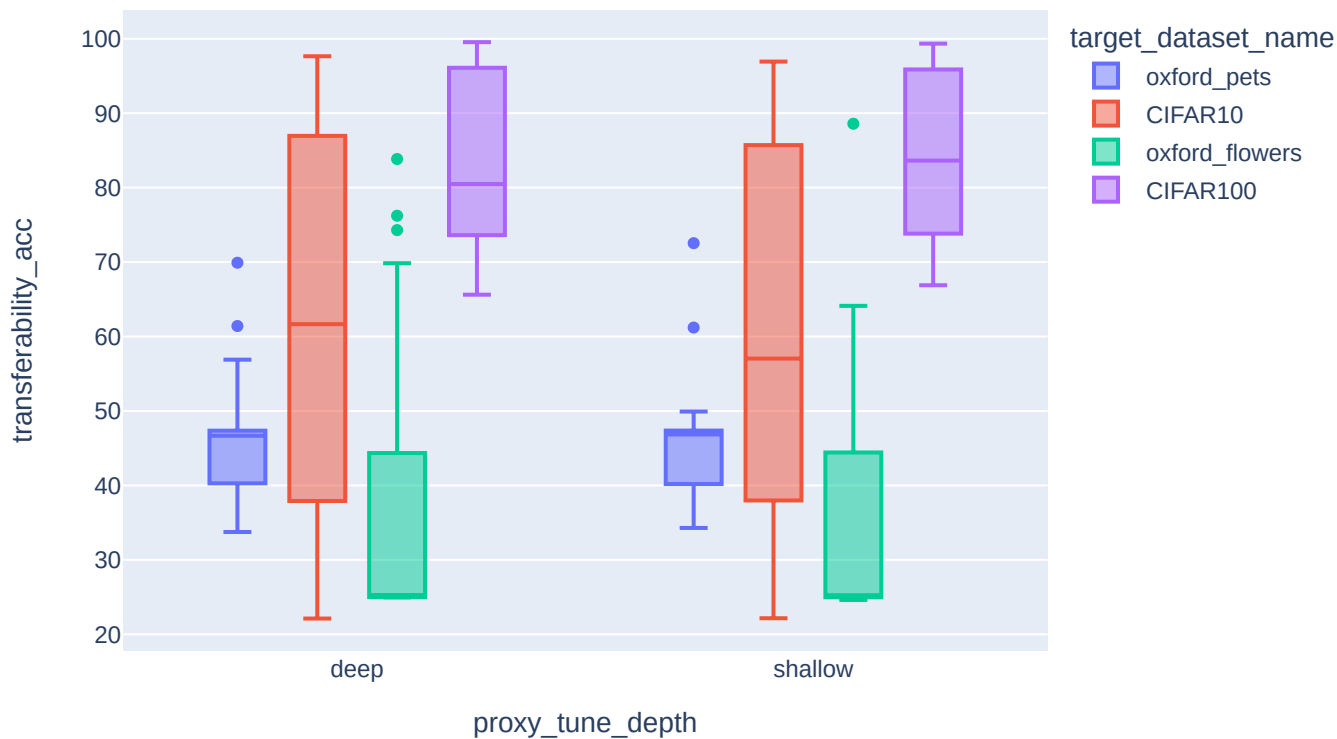

Supplement: supplementary_material [file transferability_box_pirl_jigsaw_4node_pirl_jigsaw_4node_resnet_22_07_20_proxy_tune_depth.pdf › adversarial_for_icml/figures/transferability_per_model_family/transferability_box_pirl_jigsaw_4node_pirl_jigsaw_4node_resnet_22_07_20_proxy_tune_depth.pdf]

Box plot for pirl\_jigsaw\_4node\_pirl\_jigsaw\_4node\_resnet\_22\_07\_20 and proxy\_tune\_mo

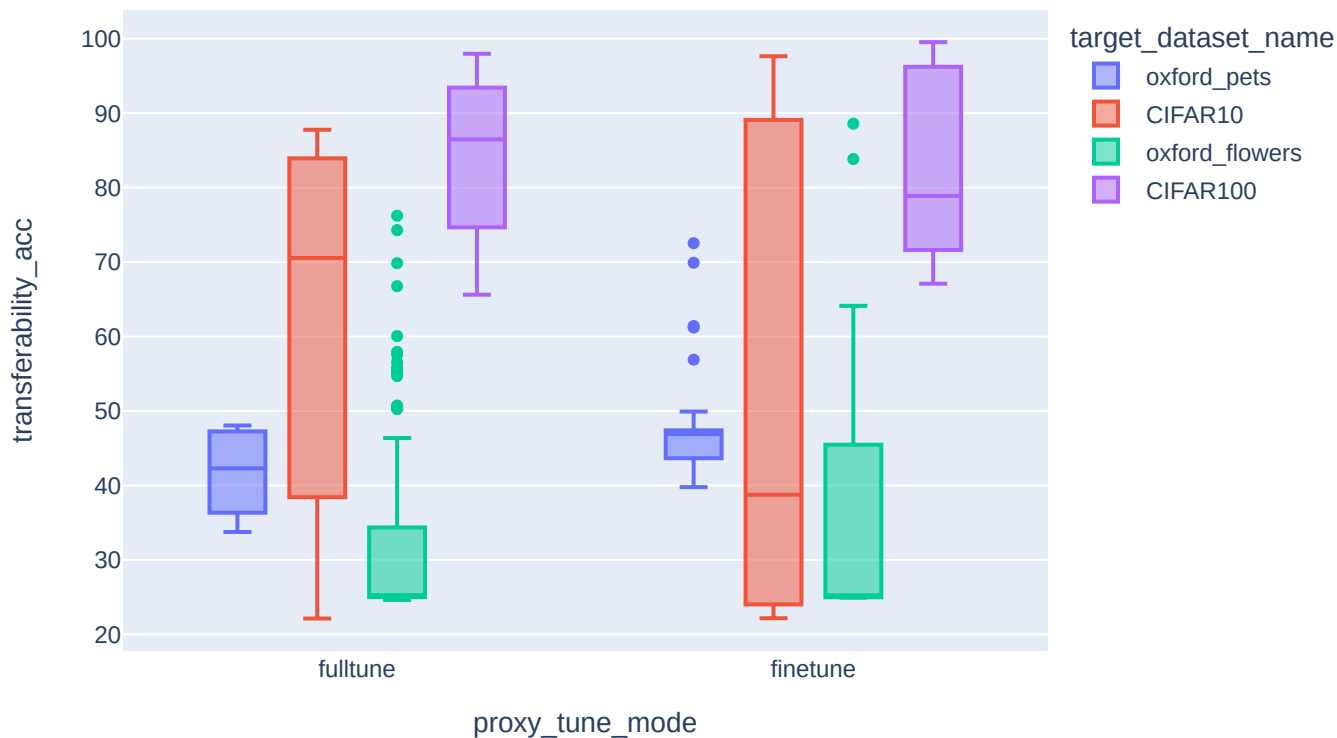

Supplement: supplementary_material [file transferability_box_pirl_jigsaw_4node_pirl_jigsaw_4node_resnet_22_07_20_proxy_tune_mode.pdf › adversarial_for_icml/figures/transferability_per_model_family/transferability_box_pirl_jigsaw_4node_pirl_jigsaw_4node_resnet_22_07_20_proxy_tune_mode.pdf]

Box plot for pirl\_jigsaw\_4node\_pirl\_jigsaw\_4node\_resnet\_22\_07\_20 and targeted

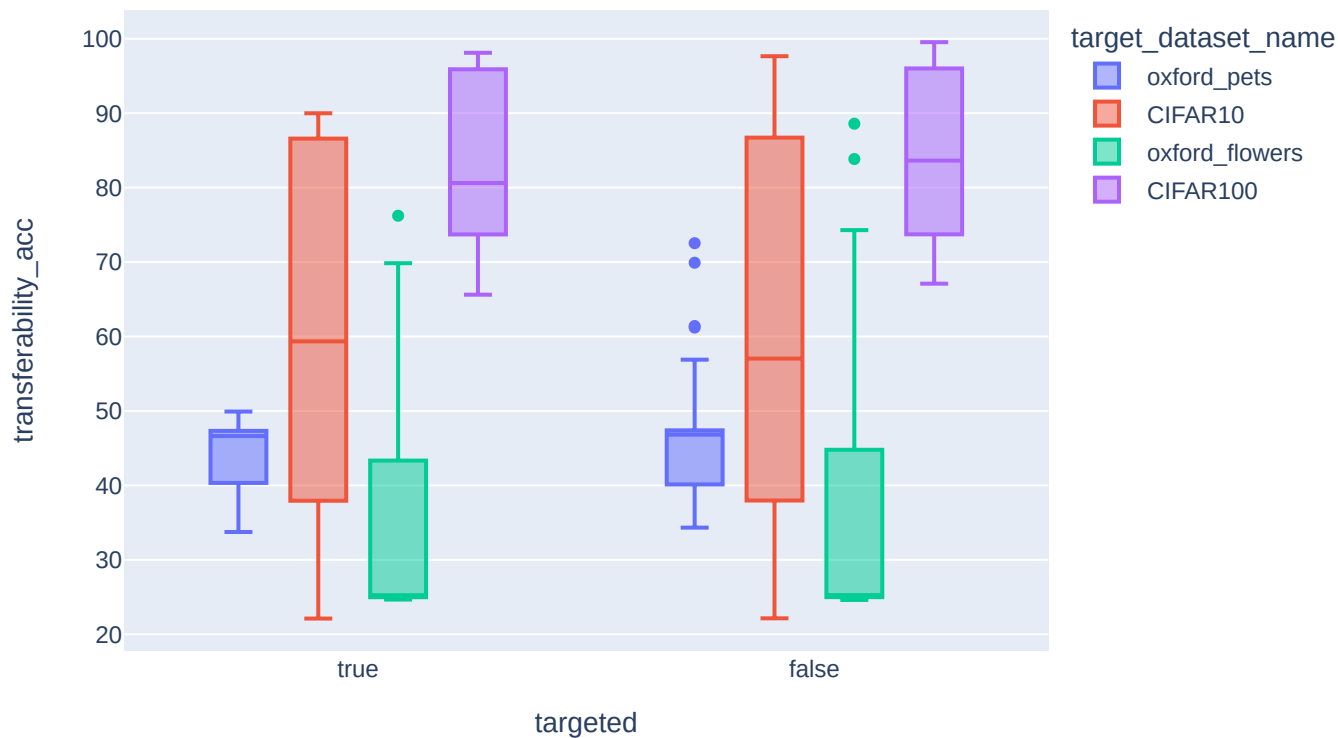

Supplement: supplementary_material [file transferability_box_pirl_jigsaw_4node_pirl_jigsaw_4node_resnet_22_07_20_targeted.pdf › adversarial_for_icml/figures/transferability_per_model_family/transferability_box_pirl_jigsaw_4node_pirl_jigsaw_4node_resnet_22_07_20_targeted.pdf]

Bar plot for proxy\_tune\_depth vs target\_tune\_depth

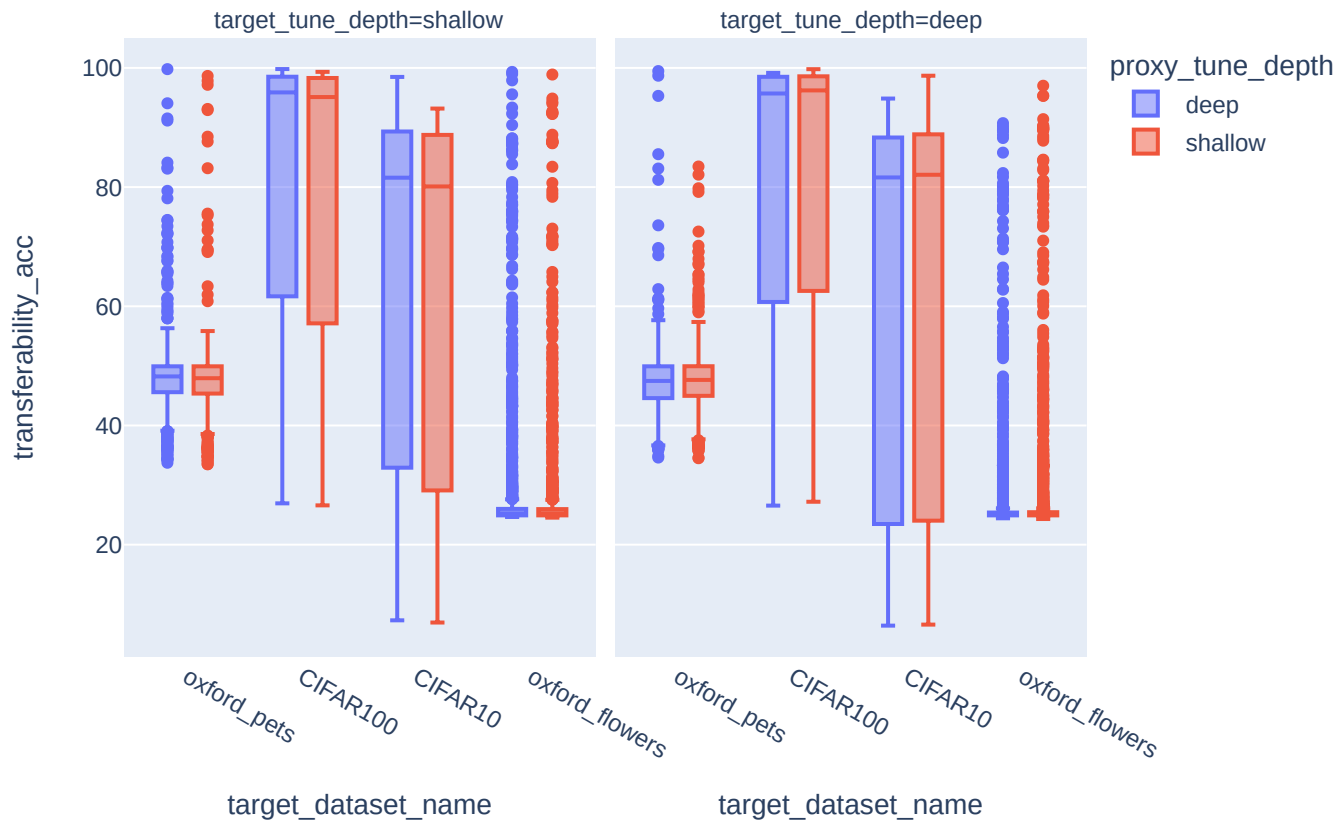

Supplement: supplementary_material [file transferability_box_proxy_tune_depth_target_tune_depth.pdf › adversarial_for_icml/figures/transferability_per_model_family/transferability_box_proxy_tune_depth_target_tune_depth.pdf]

Bar plot for proxy\_tune\_mode vs target\_tune\_mode

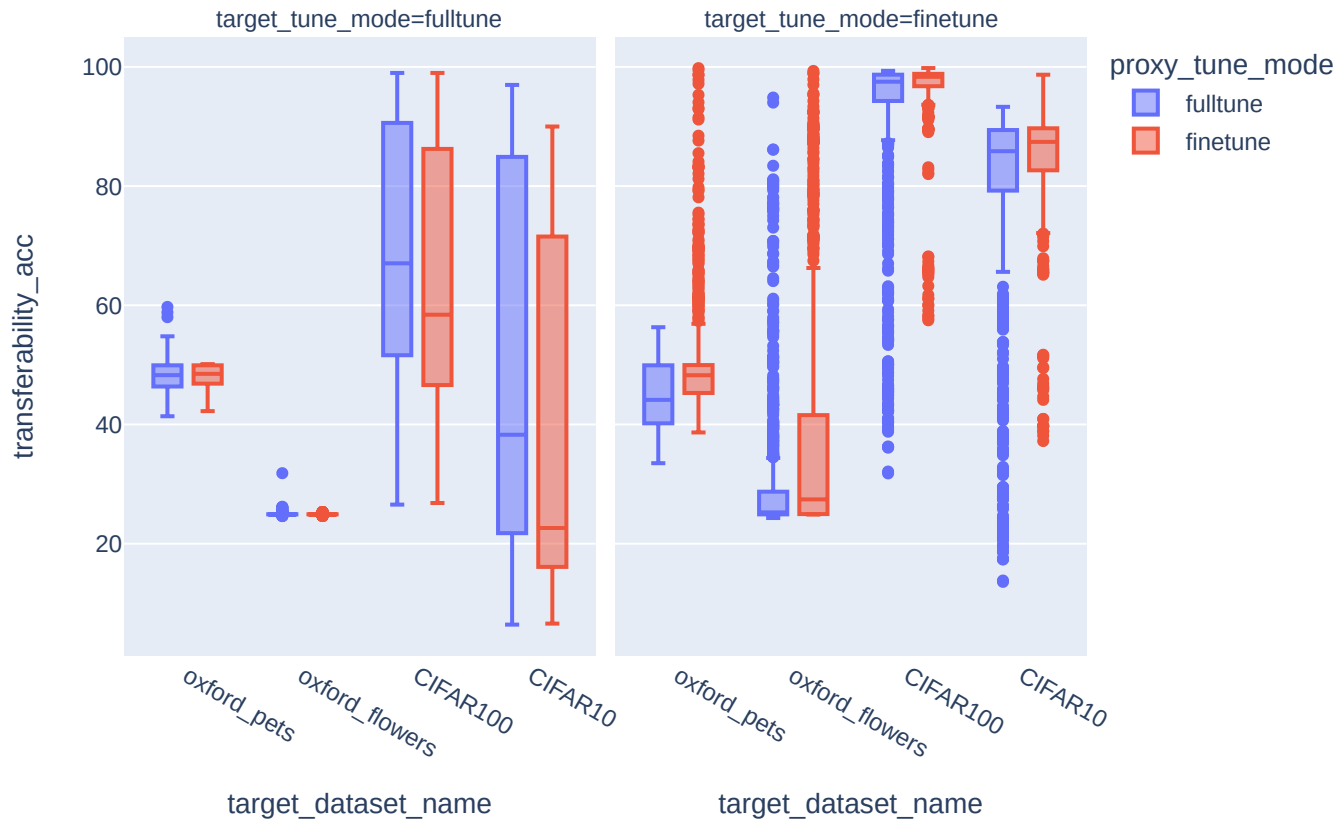

Supplement: supplementary_material [file transferability_box_proxy_tune_mode_target_tune_mode.pdf › adversarial_for_icml/figures/transferability_per_model_family/transferability_box_proxy_tune_mode_target_tune_mode.pdf]

Box plot for `simclr_rn101_1000ep_simclr_8node_resnet_16_07_20` and `attack_name`

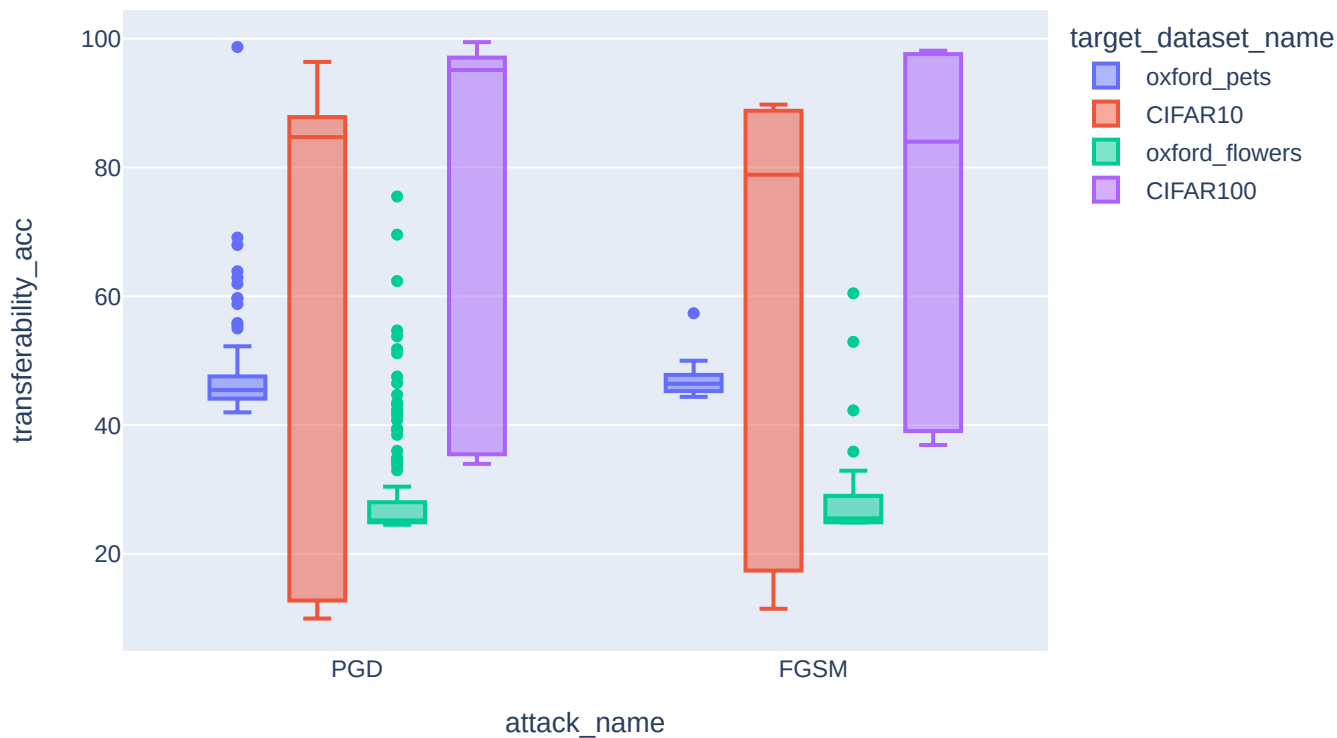

Supplement: supplementary_material [file transferability_box_simclr_rn101_1000ep_simclr_8node_resnet_16_07_20_attack_name.pdf › adversarial_for_icml/figures/transferability_per_model_family/transferability_box_simclr_rn101_1000ep_simclr_8node_resnet_16_07_20_attack_name.pdf]

Box plot for `simclr_rn101_1000ep_simclr_8node_resnet_16_07_20` and `proxy_tune_dep`

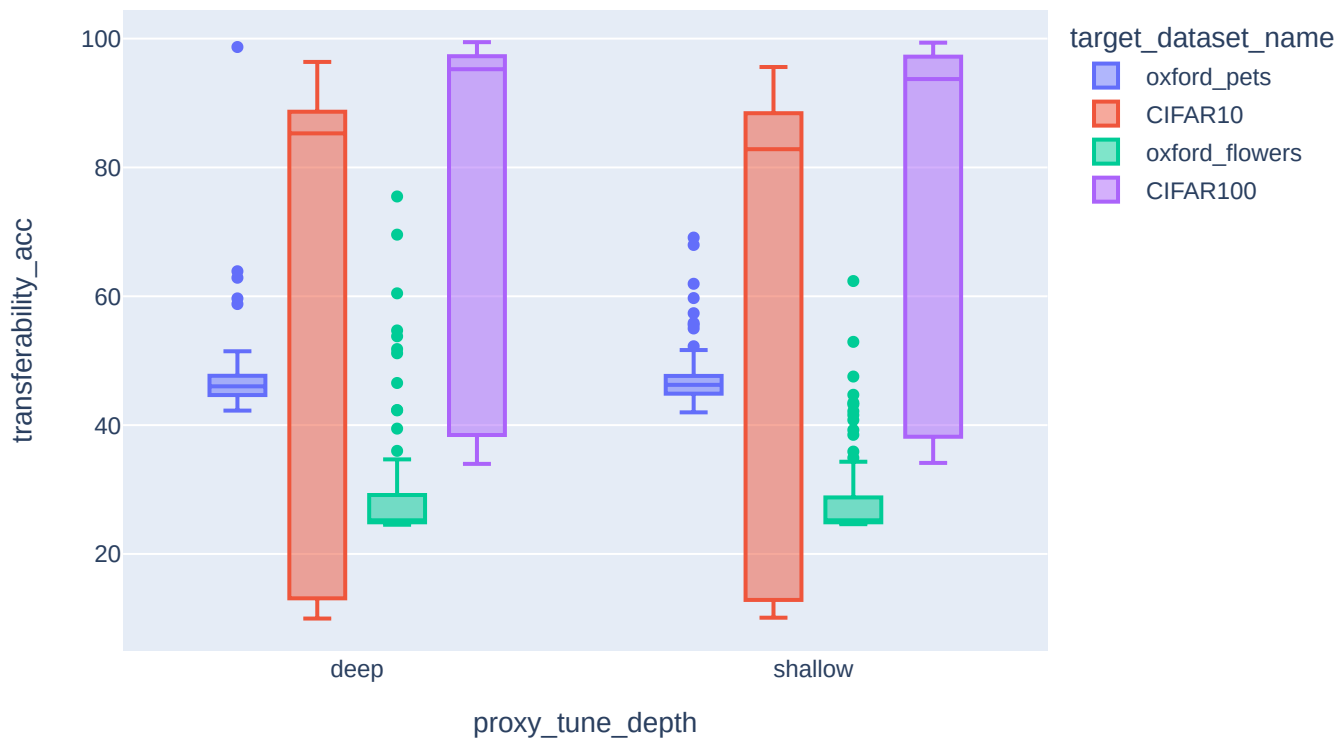

Supplement: supplementary_material [file transferability_box_simclr_rn101_1000ep_simclr_8node_resnet_16_07_20_proxy_tune_depth.pdf › adversarial_for_icml/figures/transferability_per_model_family/transferability_box_simclr_rn101_1000ep_simclr_8node_resnet_16_07_20_proxy_tune_depth.pdf]

Box plot for `simclr_rn101_1000ep_simclr_8node_resnet_16_07_20` and `proxy_tune_mod`

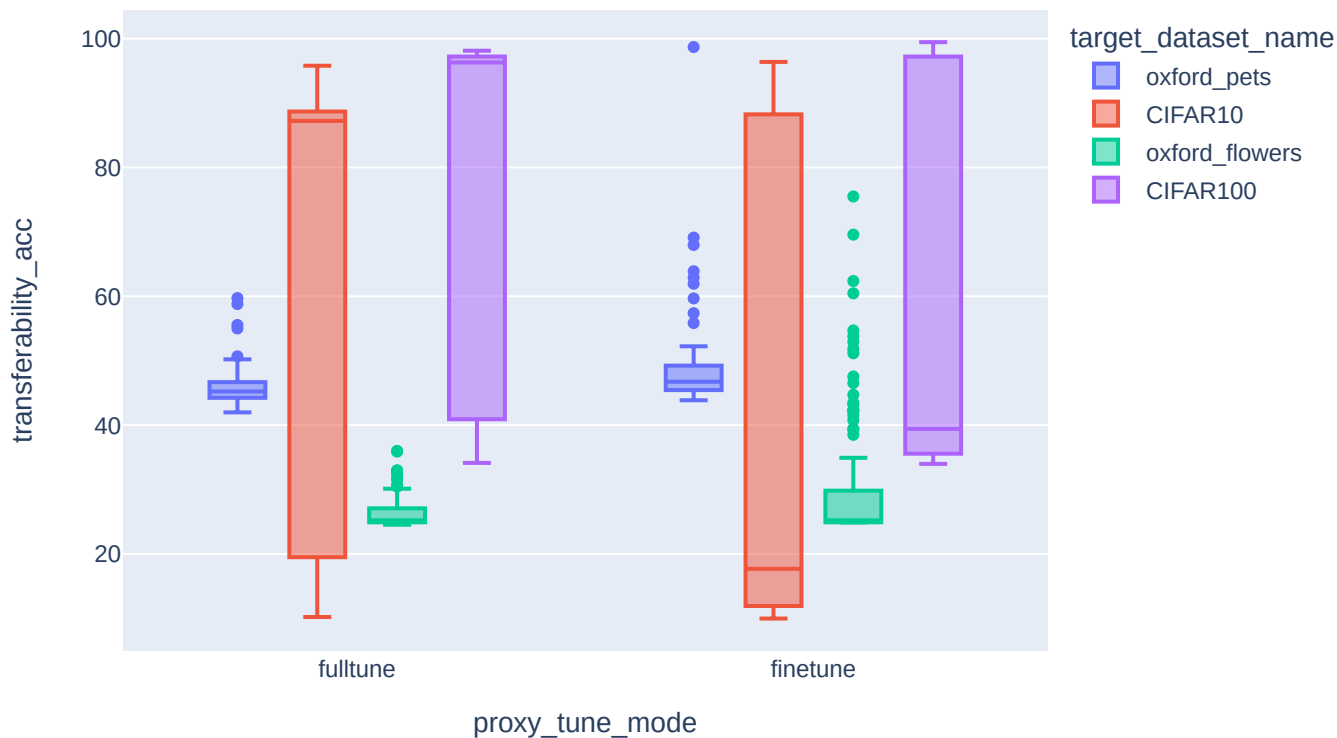

Supplement: supplementary_material [file transferability_box_simclr_rn101_1000ep_simclr_8node_resnet_16_07_20_proxy_tune_mode.pdf › adversarial_for_icml/figures/transferability_per_model_family/transferability_box_simclr_rn101_1000ep_simclr_8node_resnet_16_07_20_proxy_tune_mode.pdf]

Box plot for `simclr_rn101_1000ep_simclr_8node_resnet_16_07_20` and targeted

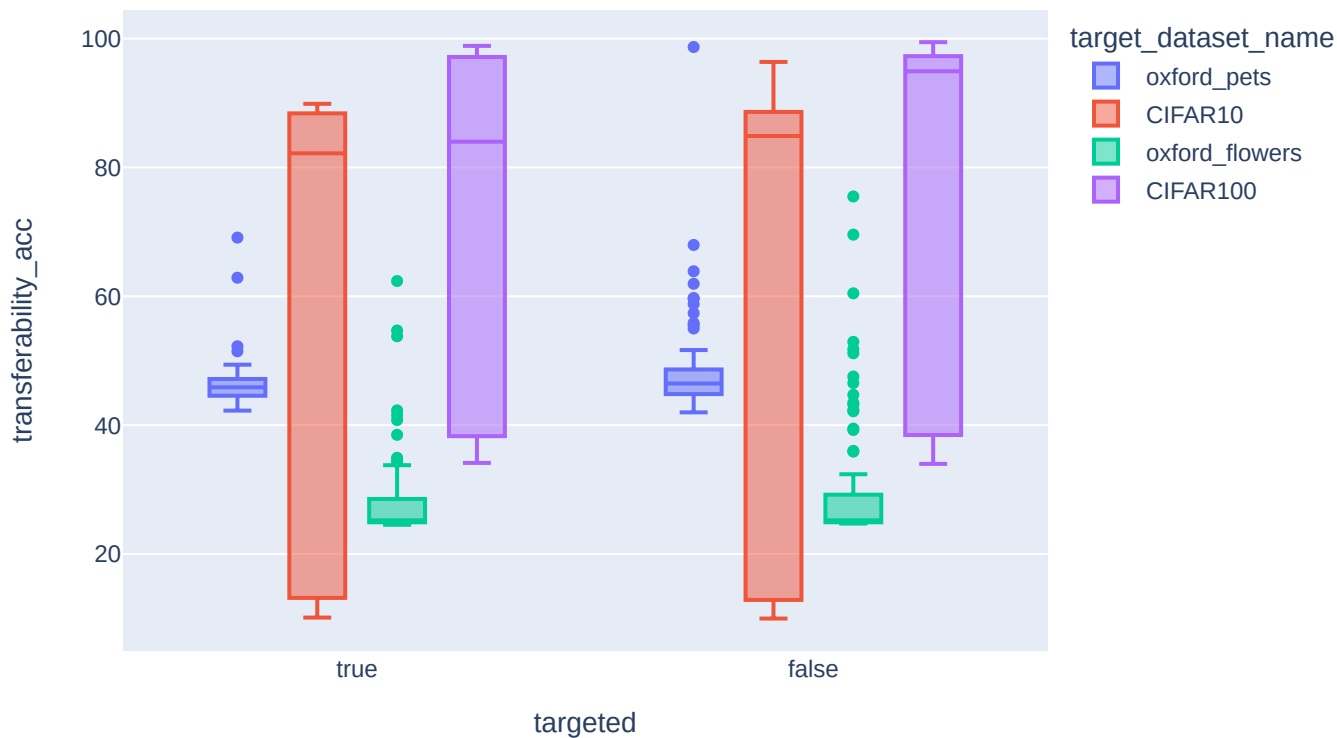

Supplement: supplementary_material [file transferability_box_simclr_rn101_1000ep_simclr_8node_resnet_16_07_20_targeted.pdf › adversarial_for_icml/figures/transferability_per_model_family/transferability_box_simclr_rn101_1000ep_simclr_8node_resnet_16_07_20_targeted.pdf]

Box plot for `simclr_rn50_800ep_simclr_8node_resnet_16_07_20` and `attack_name`

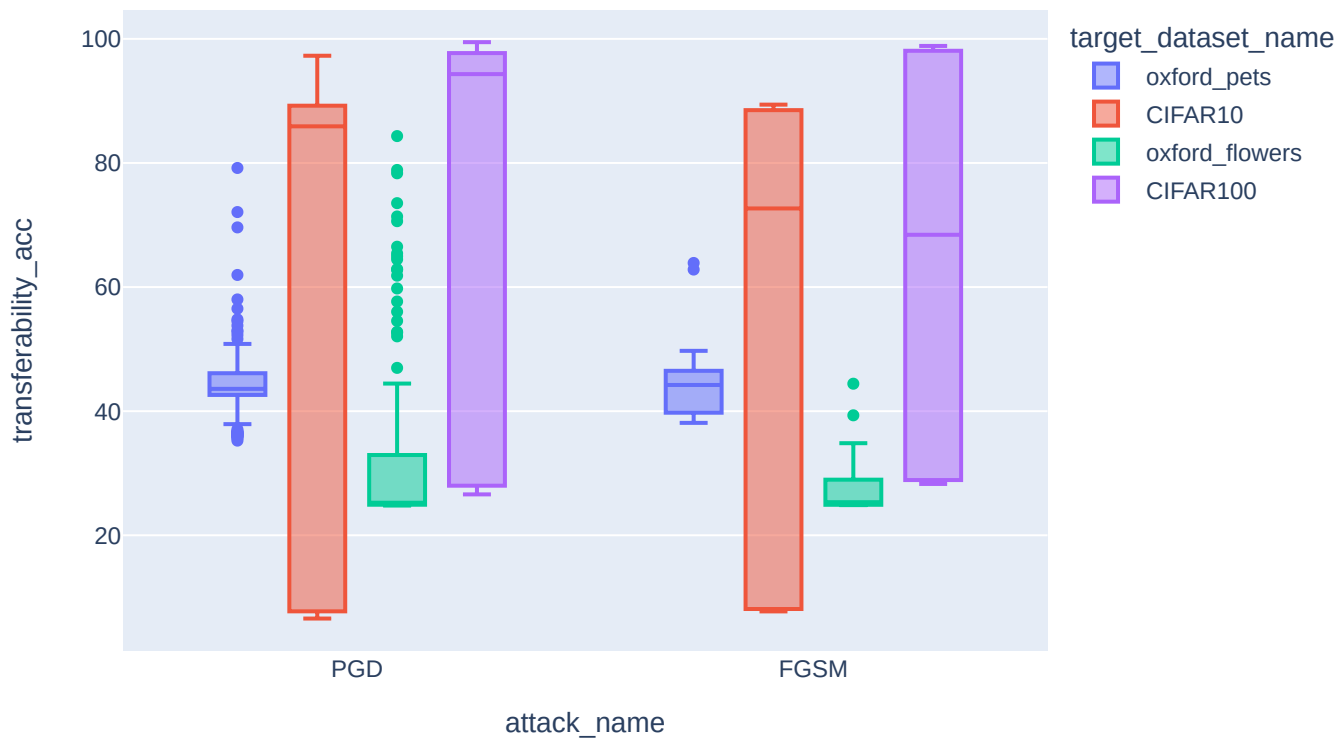

Supplement: supplementary_material [file transferability_box_simclr_rn50_800ep_simclr_8node_resnet_16_07_20_attack_name.pdf › adversarial_for_icml/figures/transferability_per_model_family/transferability_box_simclr_rn50_800ep_simclr_8node_resnet_16_07_20_attack_name.pdf]

Box plot for simclr\_rn50\_800ep\_simclr\_8node\_resnet\_16\_07\_20 and proxy\_tune\_depth

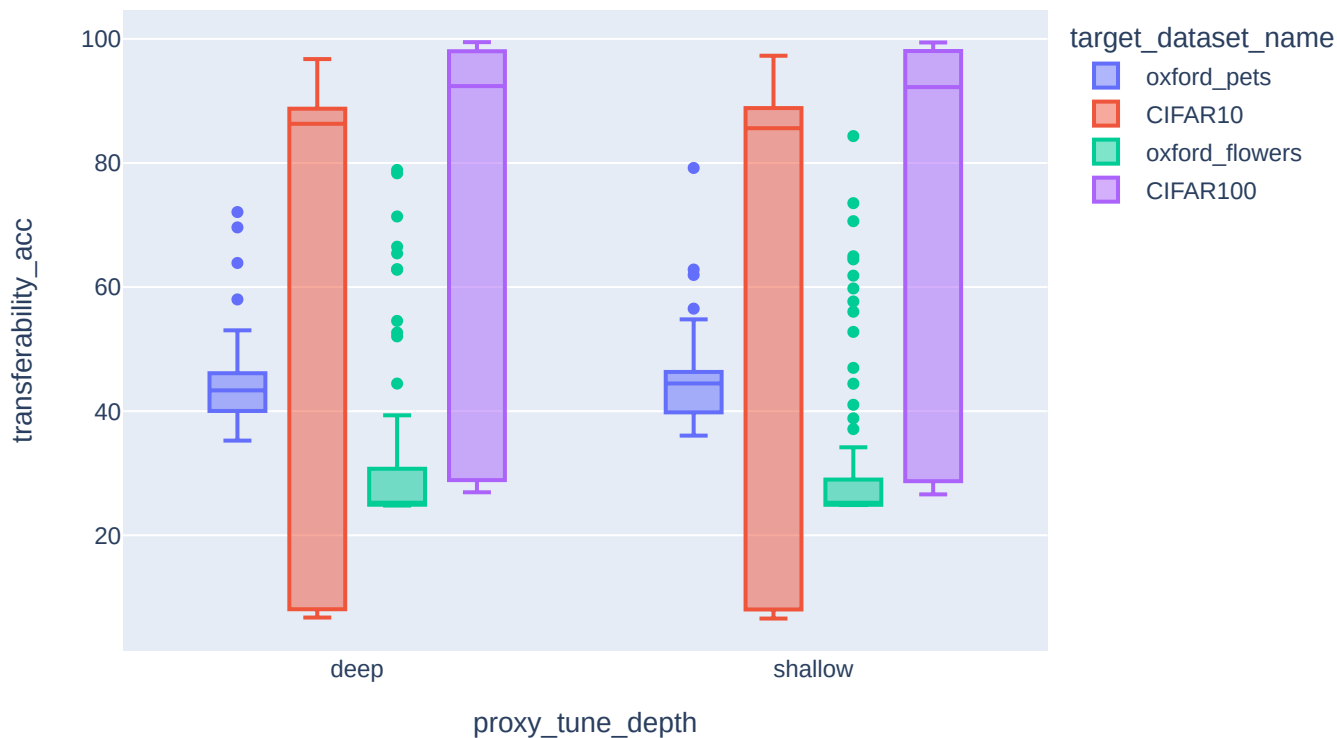

Supplement: supplementary_material [file transferability_box_simclr_rn50_800ep_simclr_8node_resnet_16_07_20_proxy_tune_depth.pdf › adversarial_for_icml/figures/transferability_per_model_family/transferability_box_simclr_rn50_800ep_simclr_8node_resnet_16_07_20_proxy_tune_depth.pdf]

Box plot for simclr\_rn50\_800ep\_simclr\_8node\_resnet\_16\_07\_20 and proxy\_tune\_mode

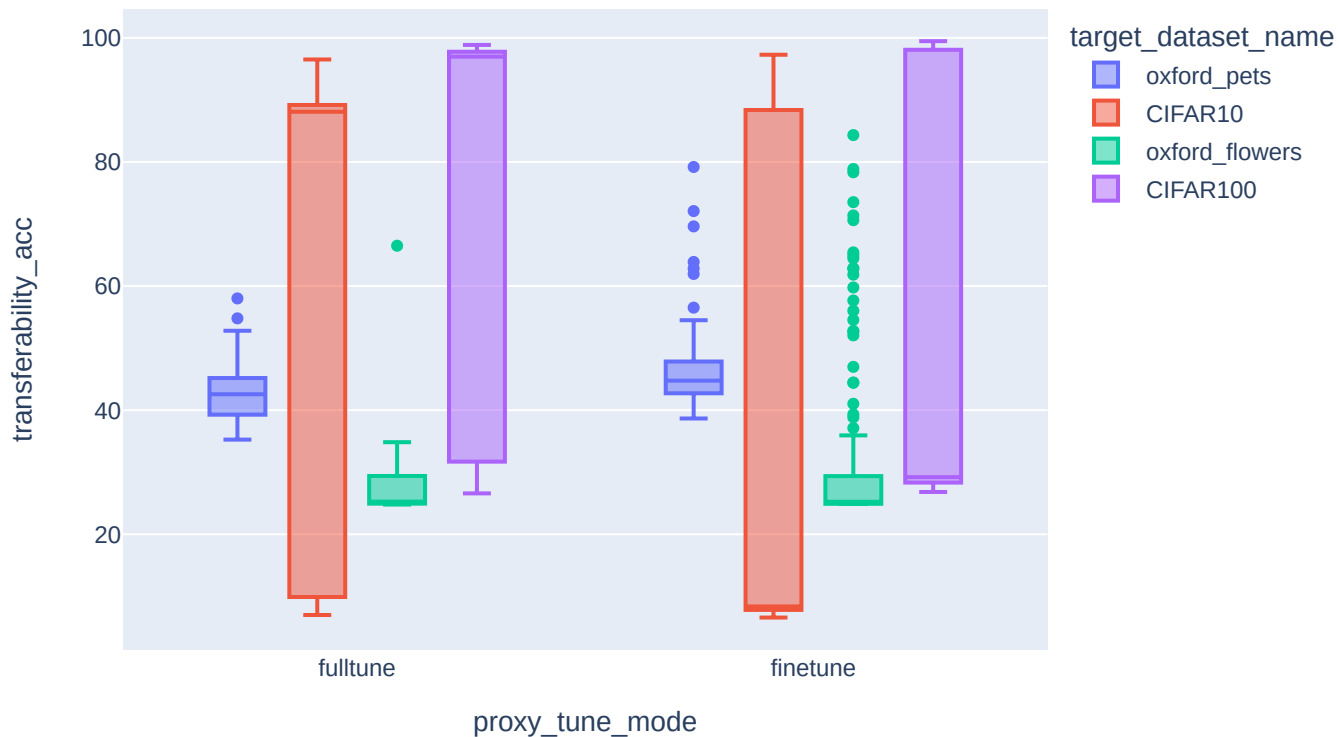

Supplement: supplementary_material [file transferability_box_simclr_rn50_800ep_simclr_8node_resnet_16_07_20_proxy_tune_mode.pdf › adversarial_for_icml/figures/transferability_per_model_family/transferability_box_simclr_rn50_800ep_simclr_8node_resnet_16_07_20_proxy_tune_mode.pdf]

Box plot for simclr\_rn50\_800ep\_simclr\_8node\_resnet\_16\_07\_20 and targeted

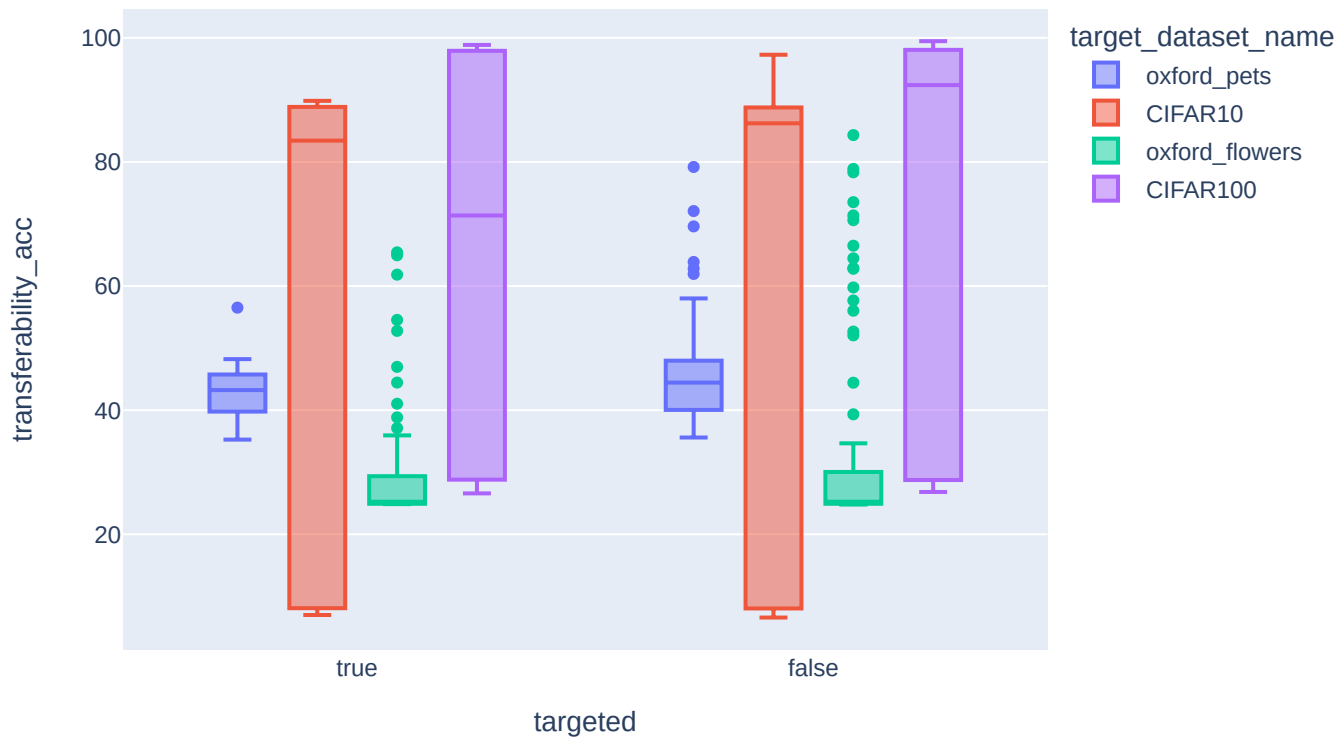

Supplement: supplementary_material [file transferability_box_simclr_rn50_800ep_simclr_8node_resnet_16_07_20_targeted.pdf › adversarial_for_icml/figures/transferability_per_model_family/transferability_box_simclr_rn50_800ep_simclr_8node_resnet_16_07_20_targeted.pdf]

Box plot for swav\_4gpu\_bs64\_400ep\_2x224\_6x96\_queue\_swav\_8node\_resnet\_28\_07\_

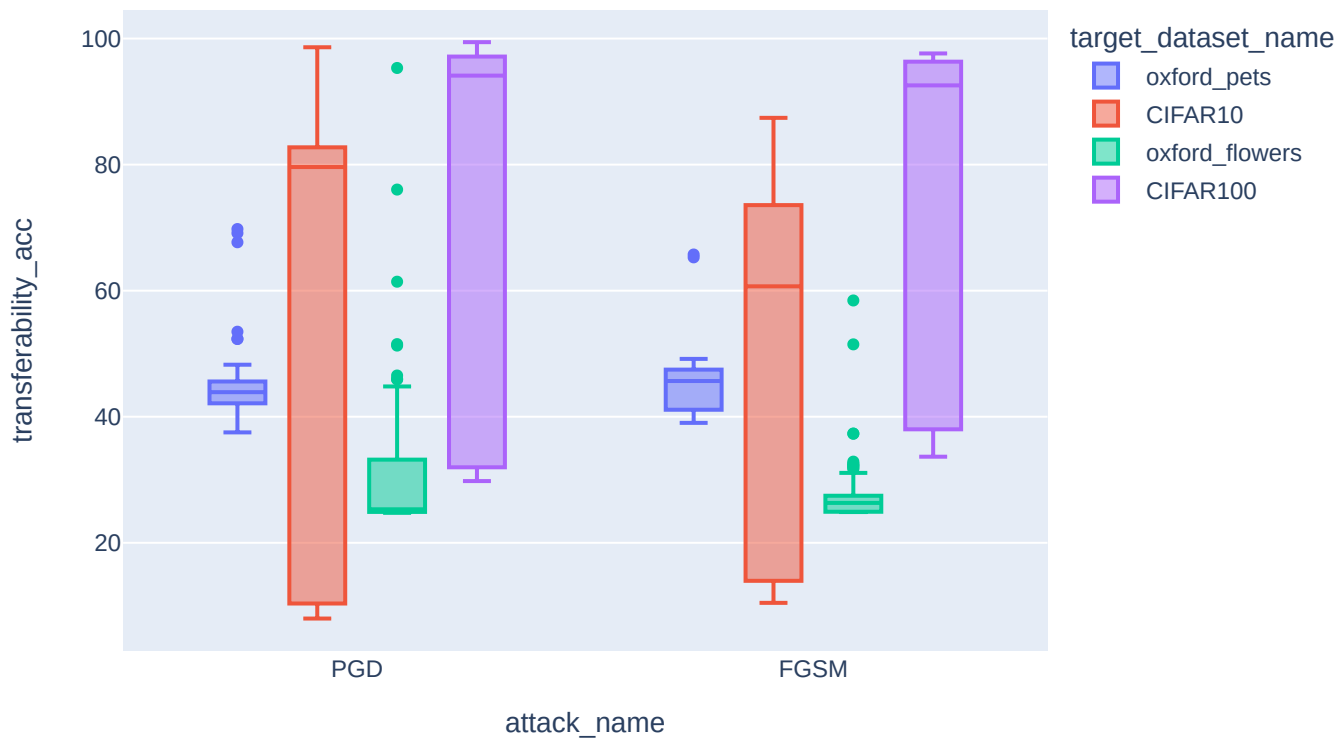

Supplement: supplementary_material [file transferability_box_swav_4gpu_bs64_400ep_2x224_6x96_queue_swav_8node_resnet_28_07_20_attack_name.pdf › adversarial_for_icml/figures/transferability_per_model_family/transferability_box_swav_4gpu_bs64_400ep_2x224_6x96_queue_swav_8node_resnet_28_07_20_attack_name.pdf]

Box plot for swav\_4gpu\_bs64\_400ep\_2x224\_6x96\_queue\_swav\_8node\_resnet\_28\_07\_

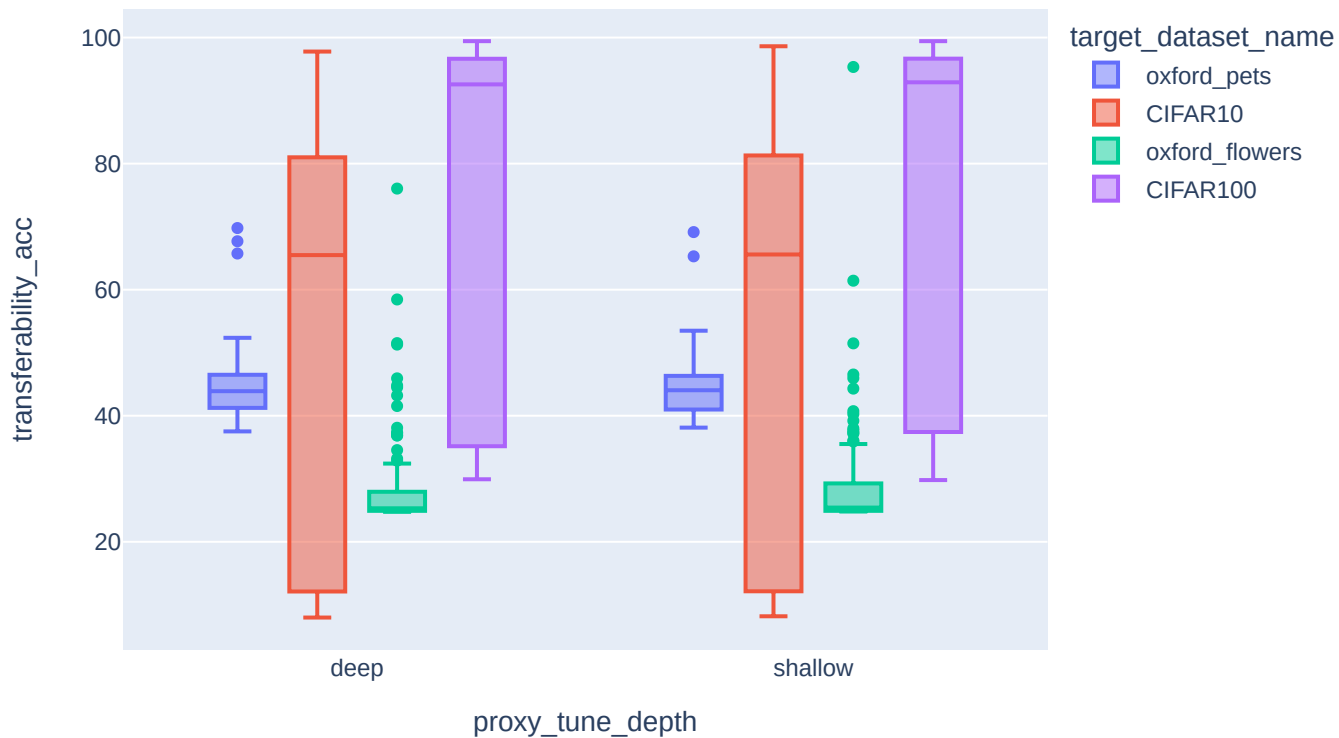

Supplement: supplementary_material [file transferability_box_swav_4gpu_bs64_400ep_2x224_6x96_queue_swav_8node_resnet_28_07_20_proxy_tune_depth.pdf › adversarial_for_icml/figures/transferability_per_model_family/transferability_box_swav_4gpu_bs64_400ep_2x224_6x96_queue_swav_8node_resnet_28_07_20_proxy_tune_depth.pdf]

Box plot for swav\_4gpu\_bs64\_400ep\_2x224\_6x96\_queue\_swav\_8node\_resnet\_28\_07\_

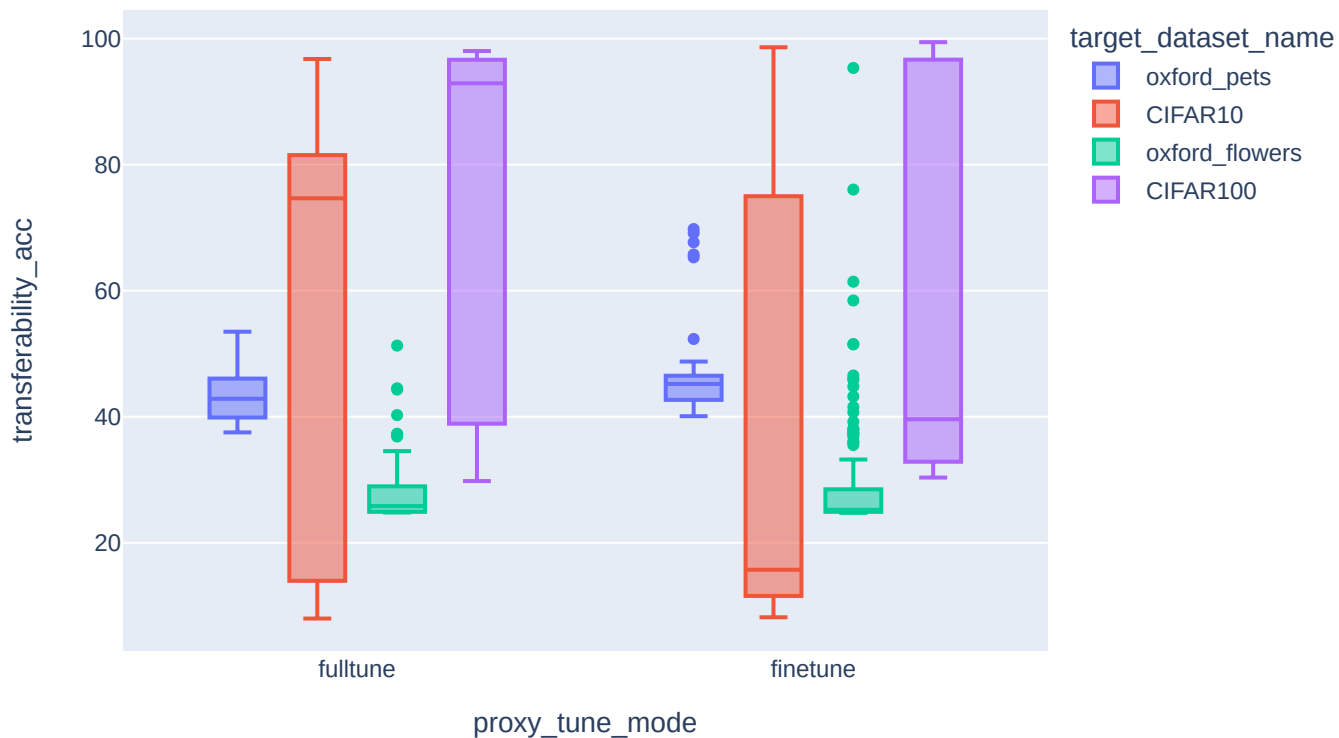

Supplement: supplementary_material [file transferability_box_swav_4gpu_bs64_400ep_2x224_6x96_queue_swav_8node_resnet_28_07_20_proxy_tune_mode.pdf › adversarial_for_icml/figures/transferability_per_model_family/transferability_box_swav_4gpu_bs64_400ep_2x224_6x96_queue_swav_8node_resnet_28_07_20_proxy_tune_mode.pdf]

Box plot for swav\_4gpu\_bs64\_400ep\_2x224\_6x96\_queue\_swav\_8node\_resnet\_28\_07\_

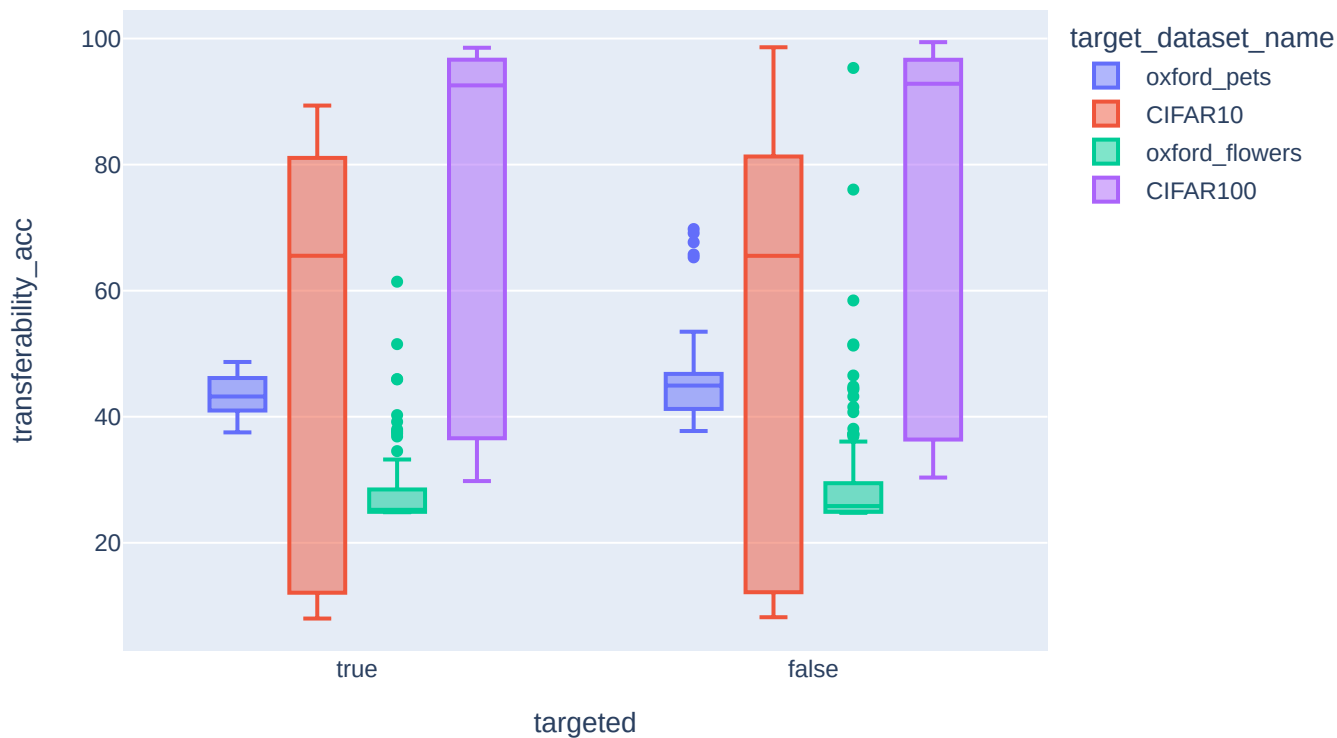

Supplement: supplementary_material [file transferability_box_swav_4gpu_bs64_400ep_2x224_6x96_queue_swav_8node_resnet_28_07_20_targeted.pdf › adversarial_for_icml/figures/transferability_per_model_family/transferability_box_swav_4gpu_bs64_400ep_2x224_6x96_queue_swav_8node_resnet_28_07_20_targeted.pdf]

Box plot for swav\_in1k\_rn50\_800ep\_swav\_8node\_resnet\_27\_07\_20 and attack\_name

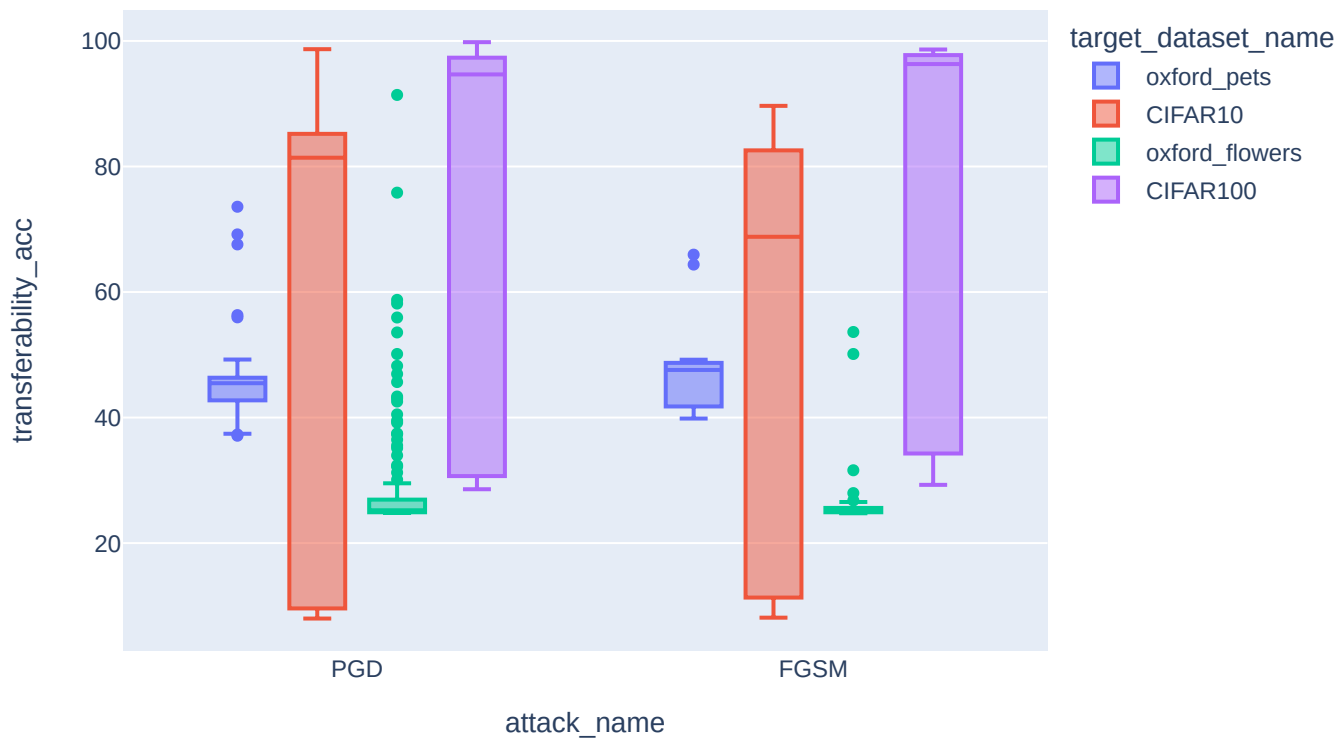

Supplement: supplementary_material [file transferability_box_swav_in1k_rn50_800ep_swav_8node_resnet_27_07_20_attack_name.pdf › adversarial_for_icml/figures/transferability_per_model_family/transferability_box_swav_in1k_rn50_800ep_swav_8node_resnet_27_07_20_attack_name.pdf]

Box plot for swav\_in1k\_rn50\_800ep\_swav\_8node\_resnet\_27\_07\_20 and proxy\_tune\_de

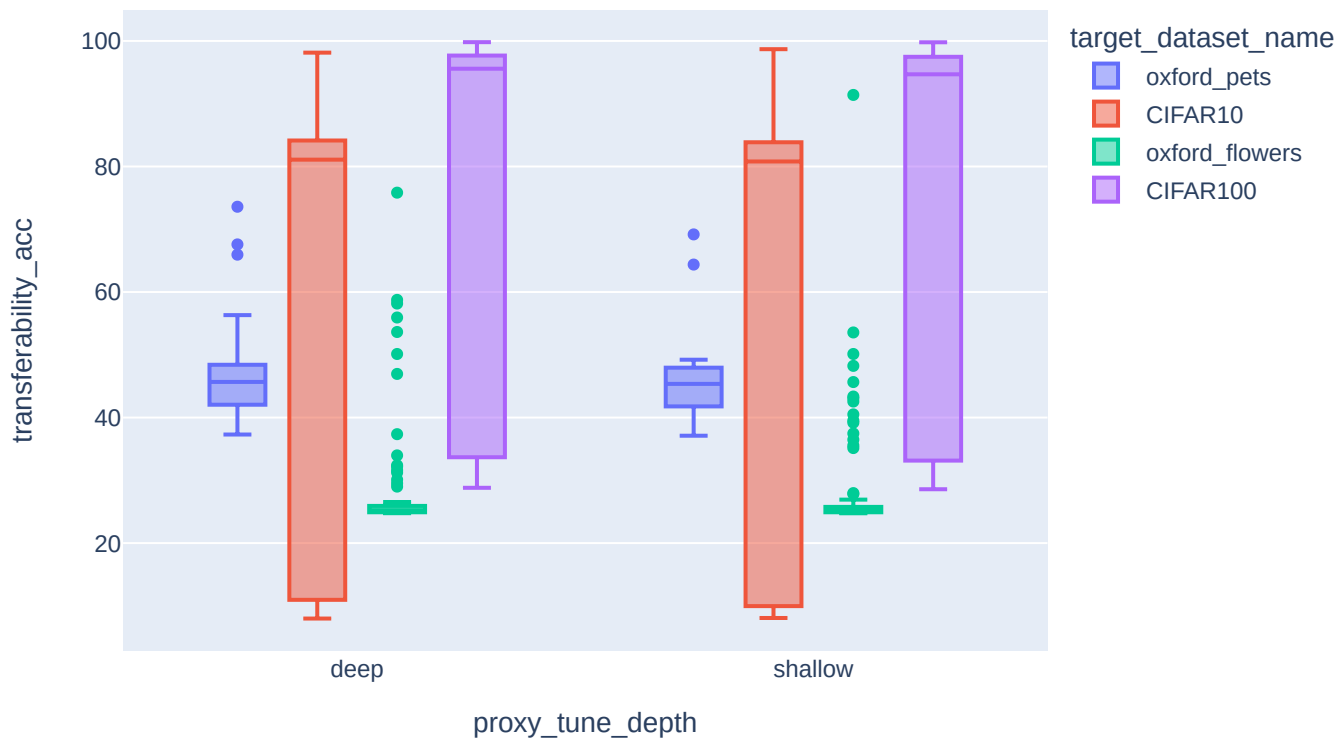

Supplement: supplementary_material [file transferability_box_swav_in1k_rn50_800ep_swav_8node_resnet_27_07_20_proxy_tune_depth.pdf › adversarial_for_icml/figures/transferability_per_model_family/transferability_box_swav_in1k_rn50_800ep_swav_8node_resnet_27_07_20_proxy_tune_depth.pdf]

Box plot for swav\_in1k\_rn50\_800ep\_swav\_8node\_resnet\_27\_07\_20 and proxy\_tune\_m

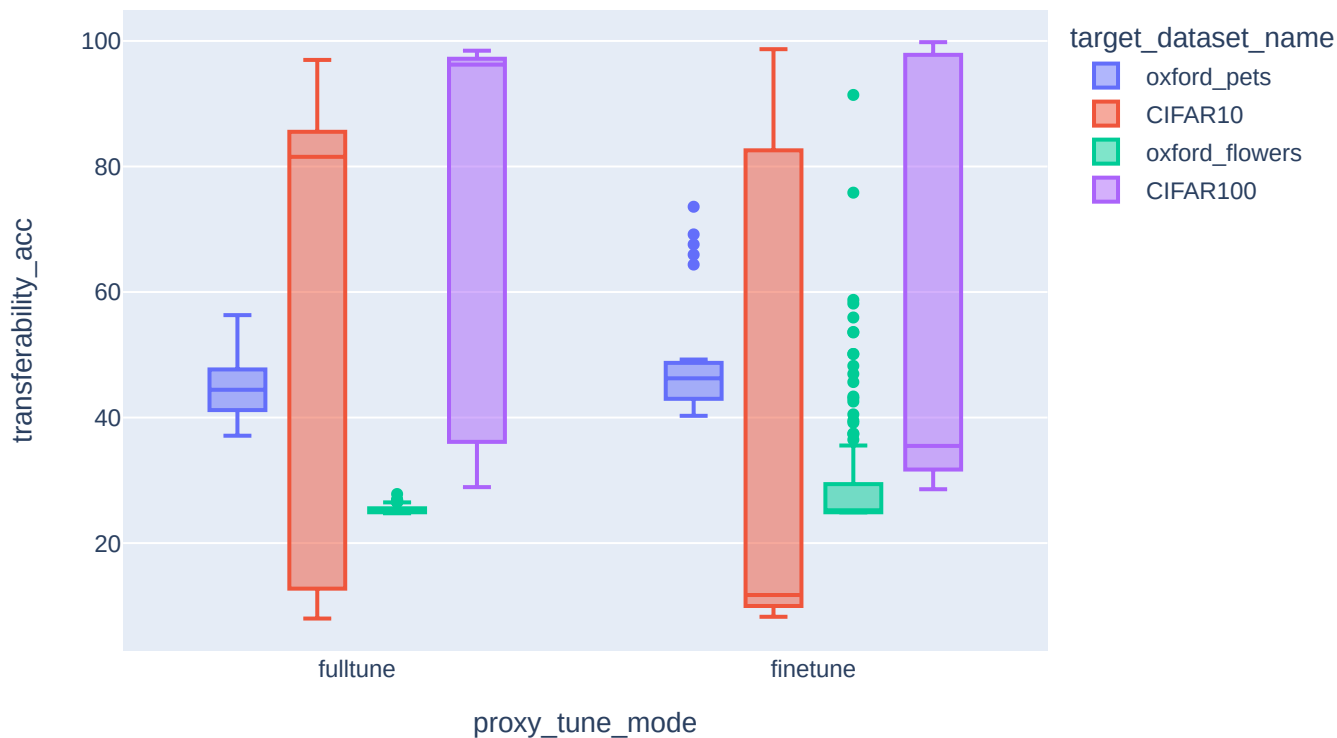

Supplement: supplementary_material [file transferability_box_swav_in1k_rn50_800ep_swav_8node_resnet_27_07_20_proxy_tune_mode.pdf › adversarial_for_icml/figures/transferability_per_model_family/transferability_box_swav_in1k_rn50_800ep_swav_8node_resnet_27_07_20_proxy_tune_mode.pdf]

Box plot for swav\_in1k\_rn50\_800ep\_swav\_8node\_resnet\_27\_07\_20 and targeted

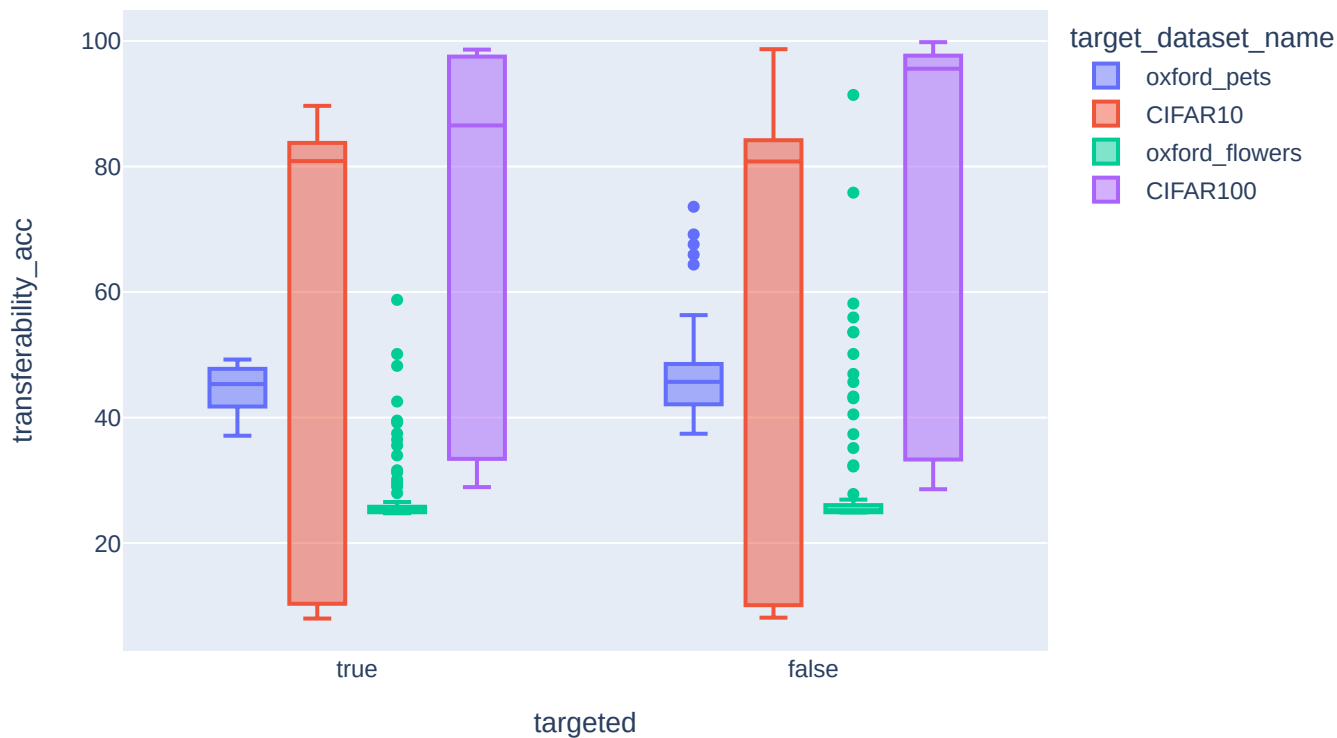

Supplement: supplementary_material [file transferability_box_swav_in1k_rn50_800ep_swav_8node_resnet_27_07_20_targeted.pdf › adversarial_for_icml/figures/transferability_per_model_family/transferability_box_swav_in1k_rn50_800ep_swav_8node_resnet_27_07_20_targeted.pdf]

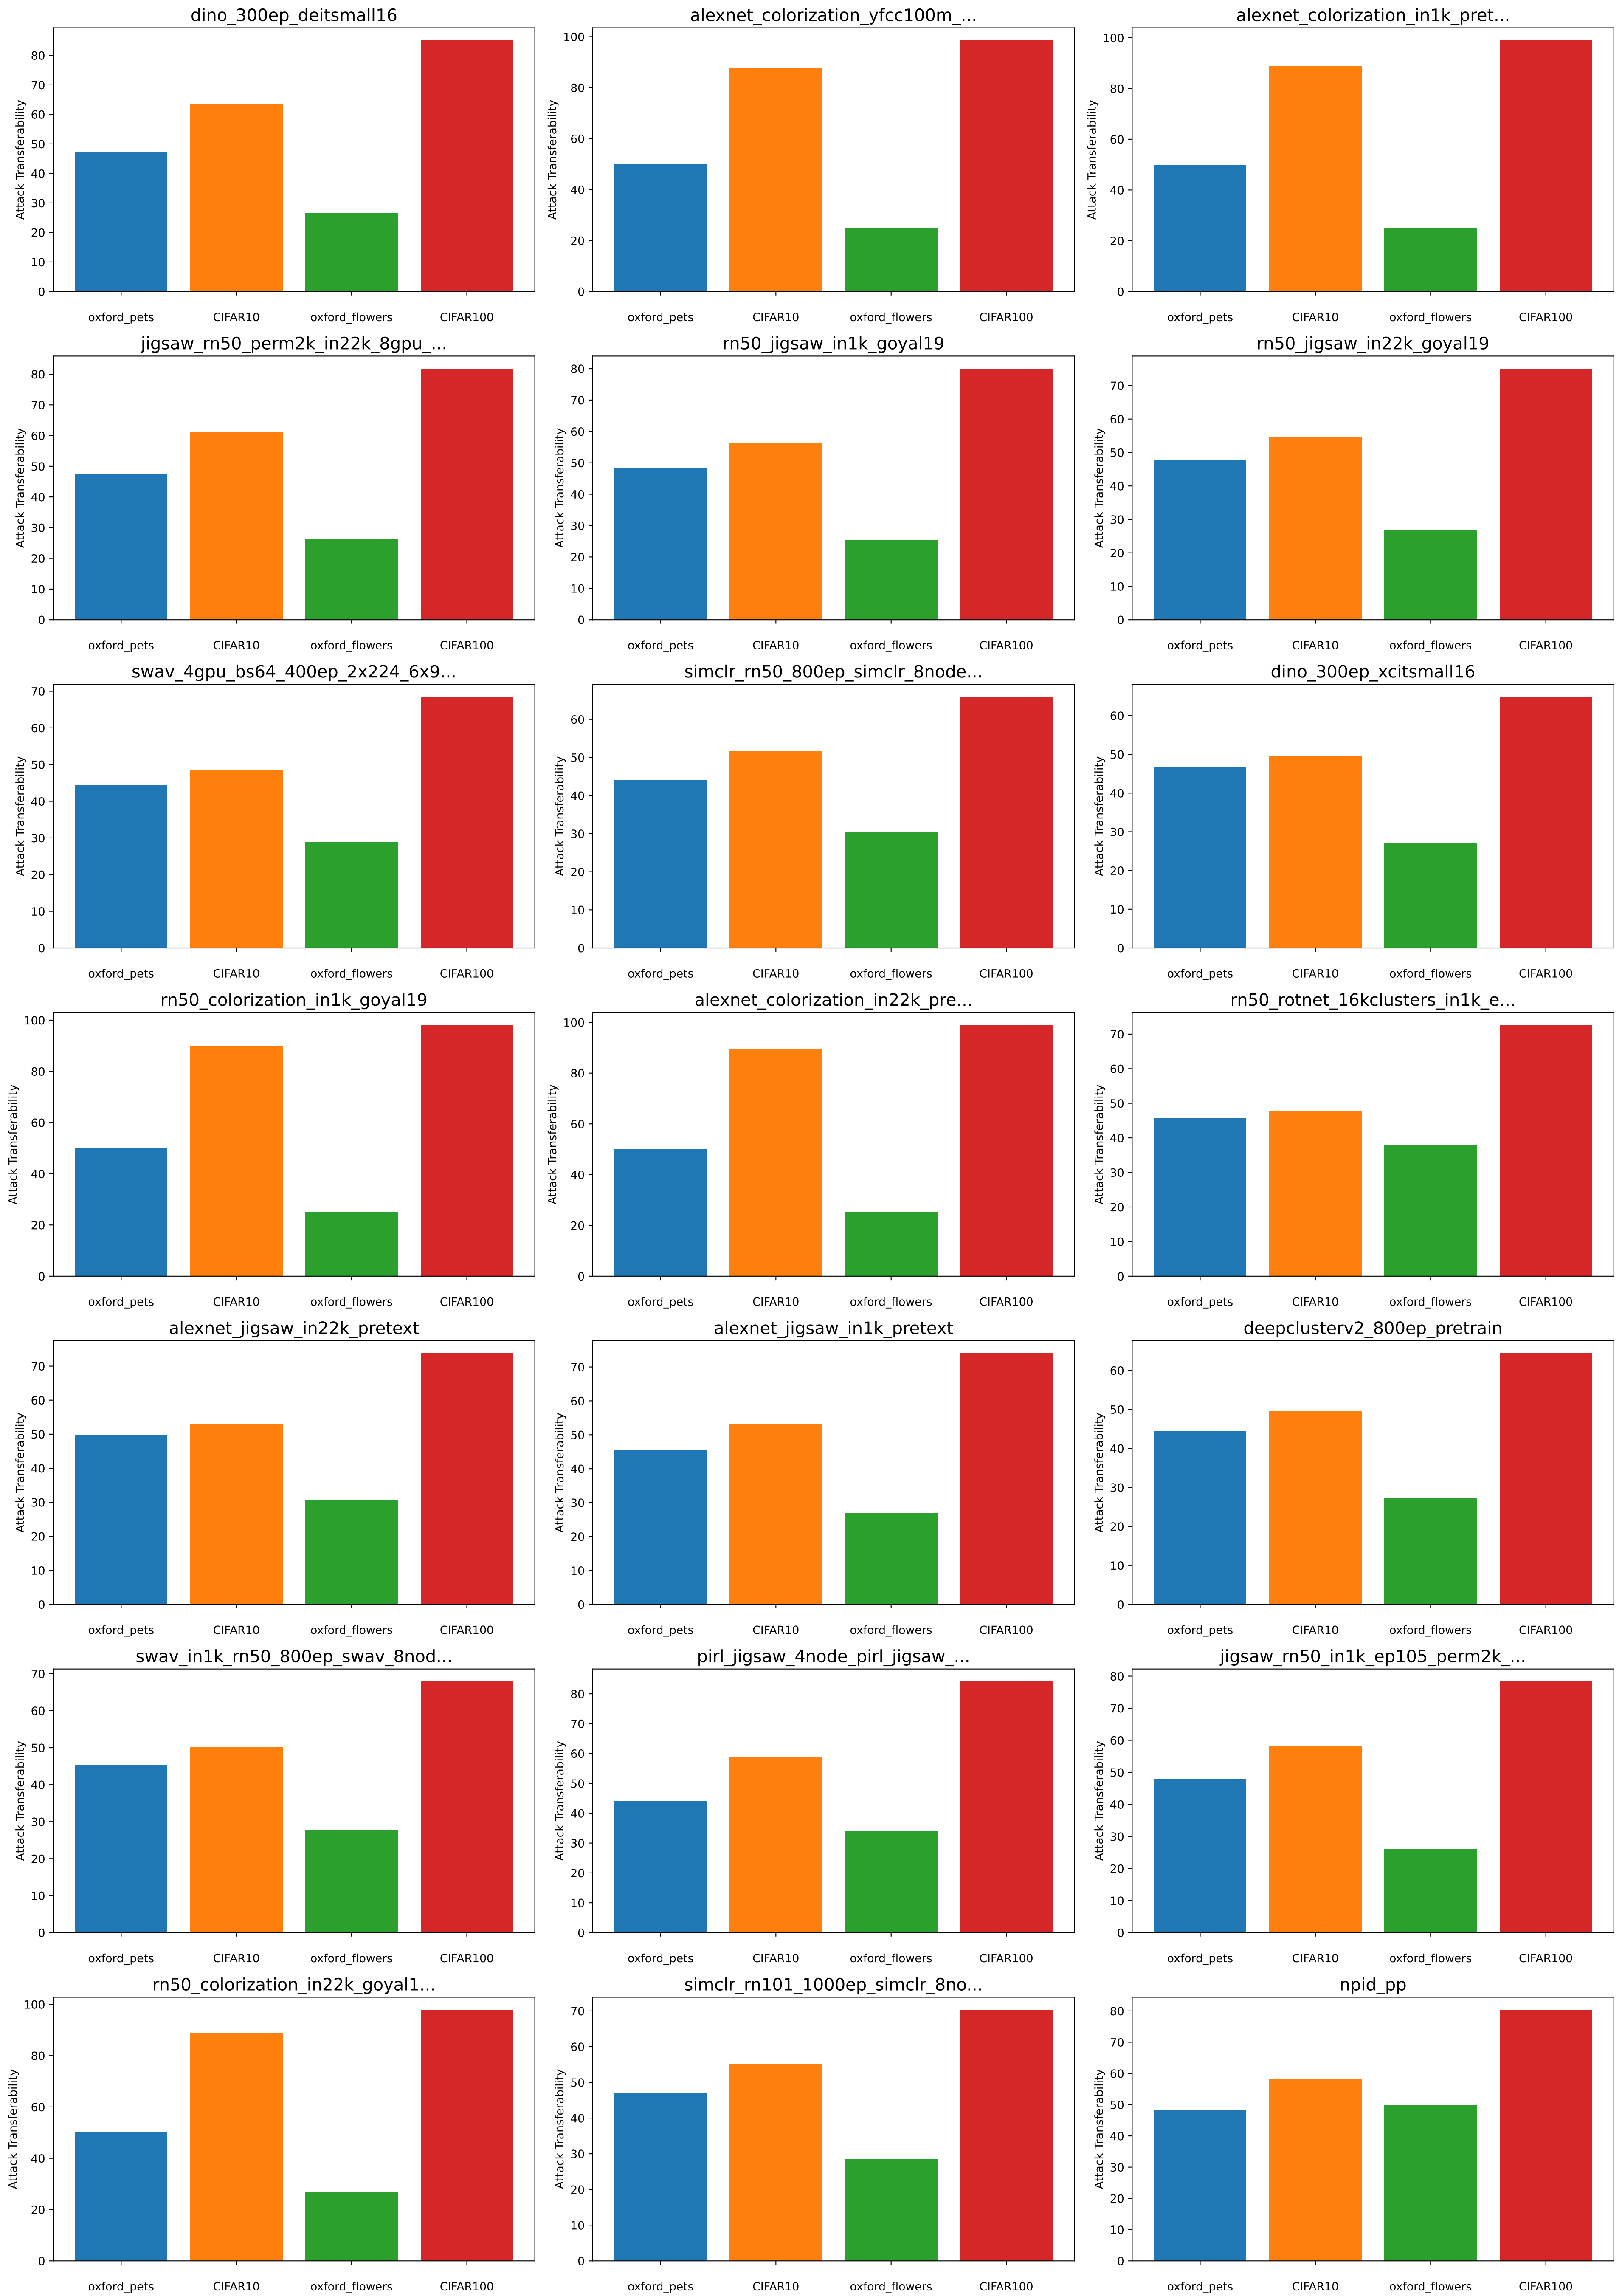

oxford\_pets CIFAR10 oxford\_flowers CIFAR100

Supplement: supplementary_material [file transferability_per_model_family.pdf › adversarial_for_icml/figures/transferability_per_model_family/transferability_per_model_family.pdf]

# Adversarial Transferability For Different Attacks

Transferability Accuracy Difference

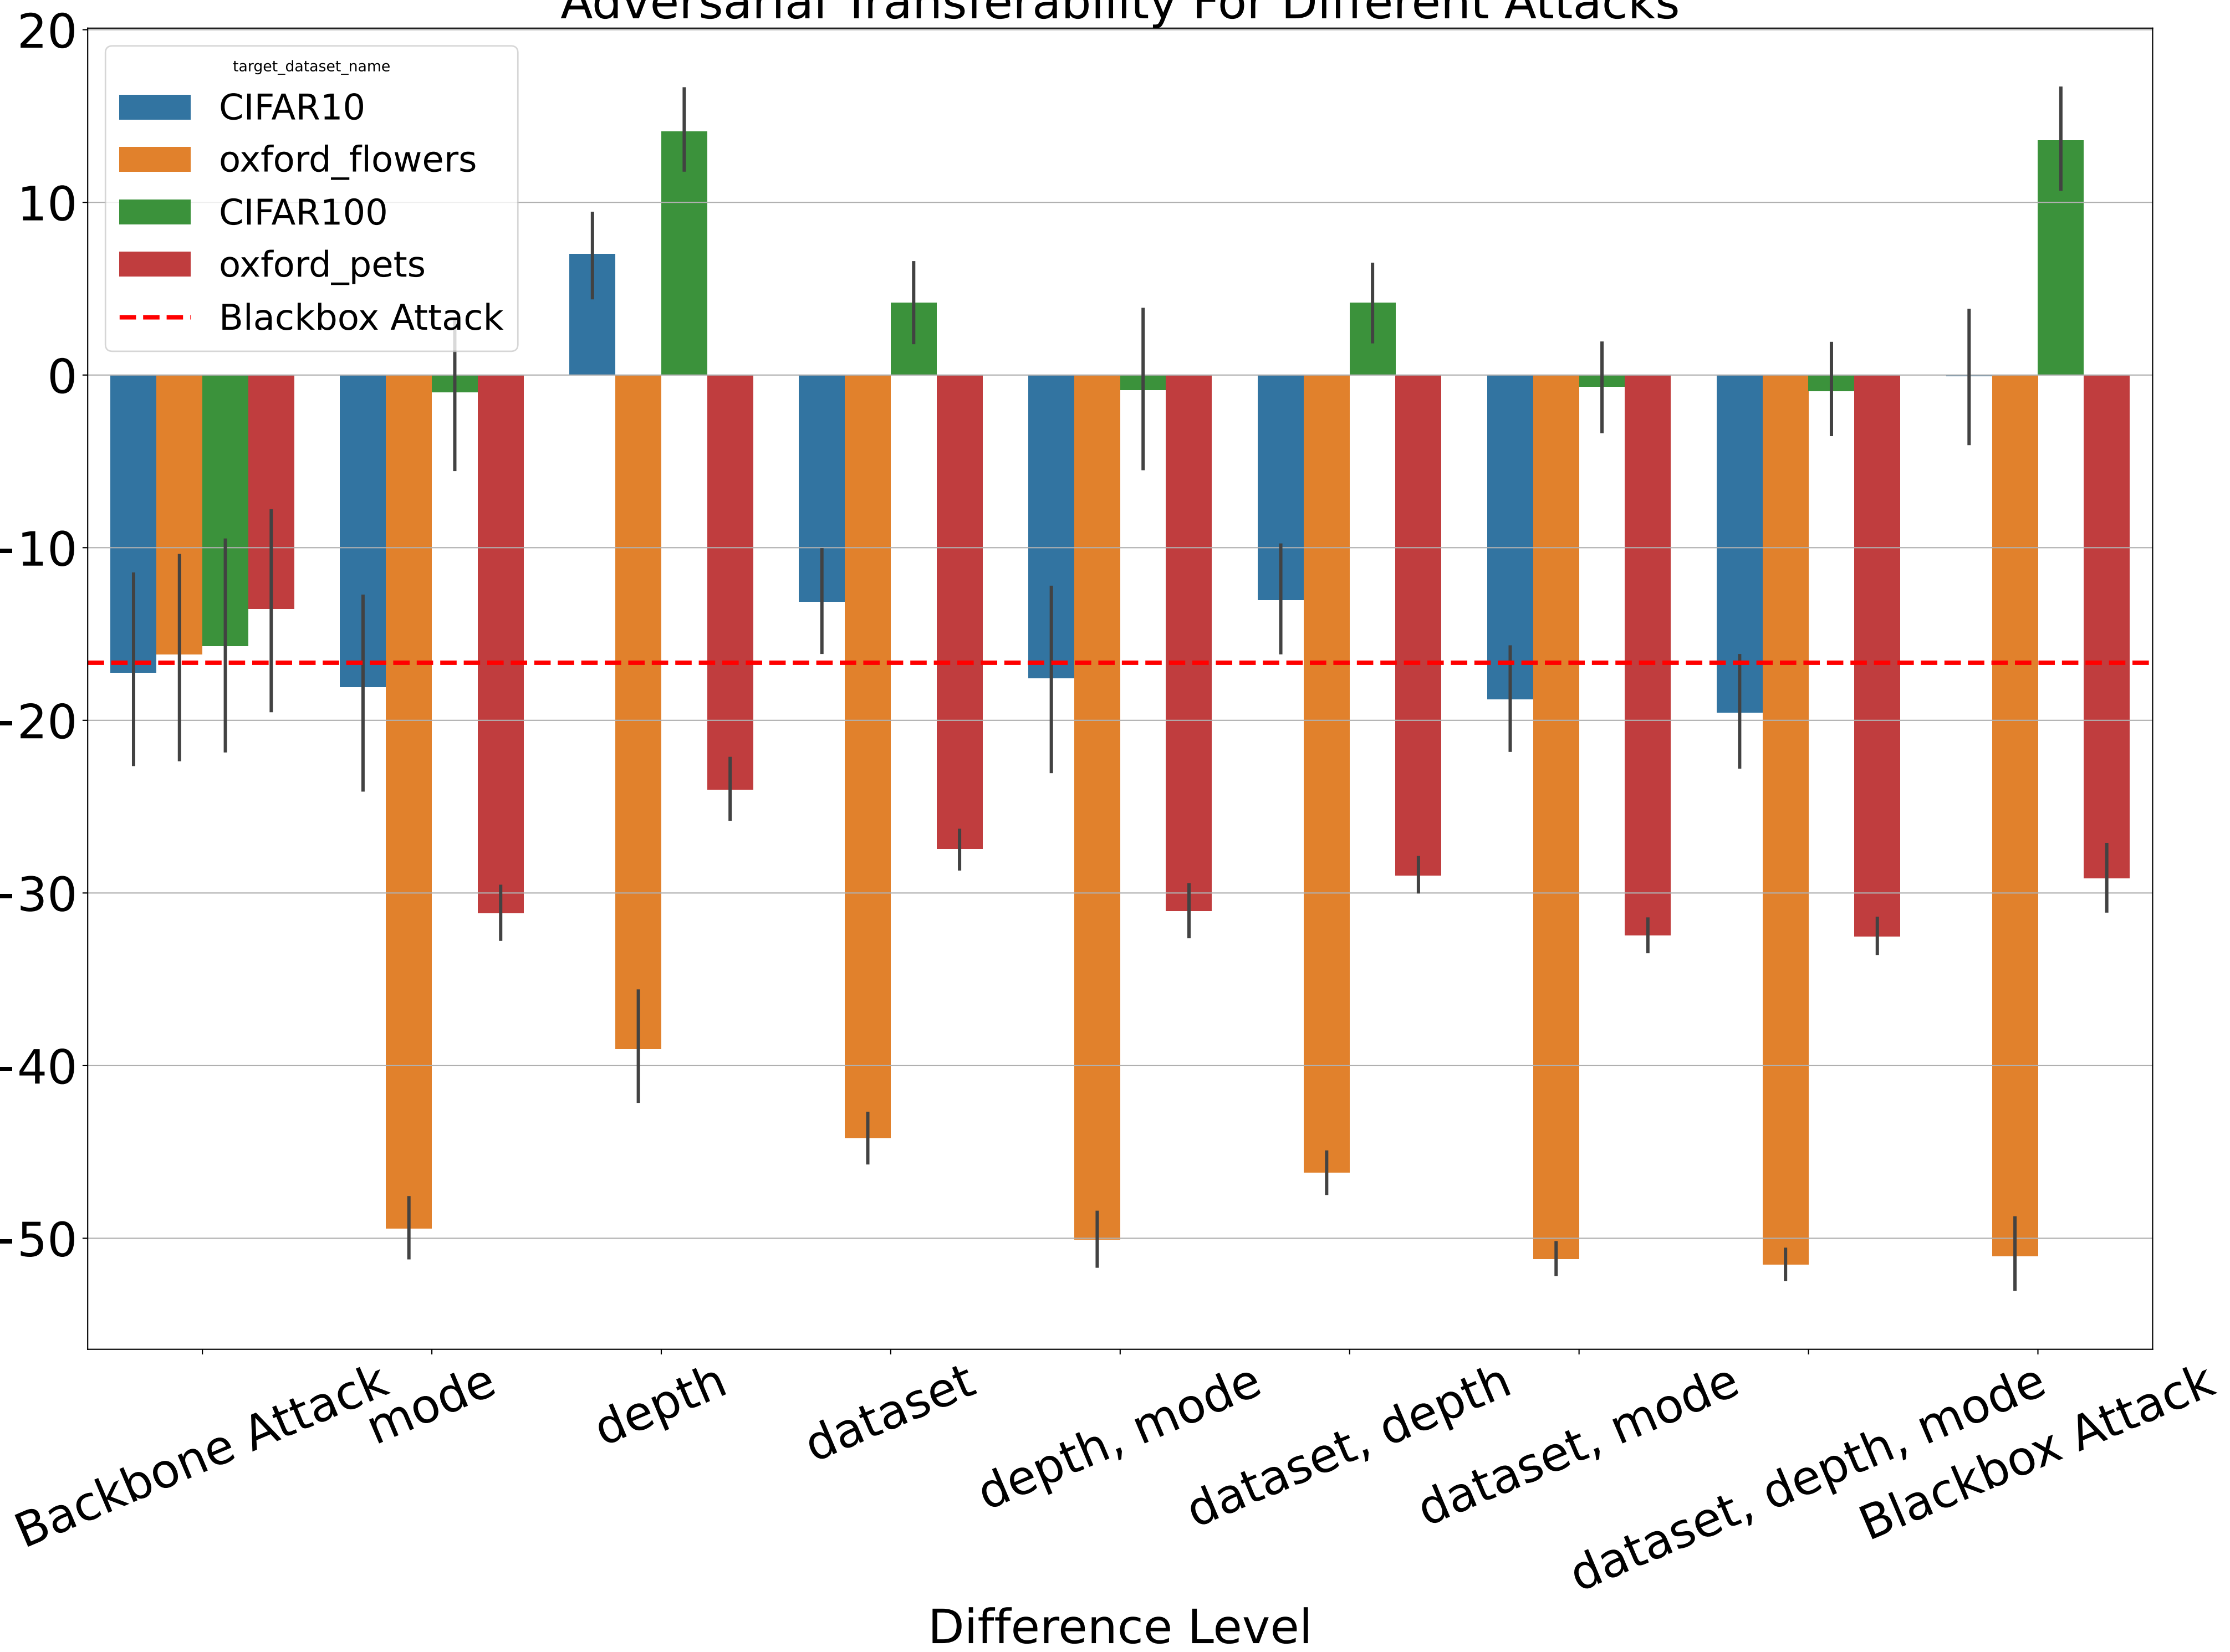

Supplement: supplementary_material [file transferability_target_dataset_whitebox_diff_with_longerPGD.pdf › adversarial_for_icml/figures/transferability_target_dataset_whitebox_diff_with_longerPGD.pdf]

Adversarial Transferability For Targeted vs non-Targeted Attacks

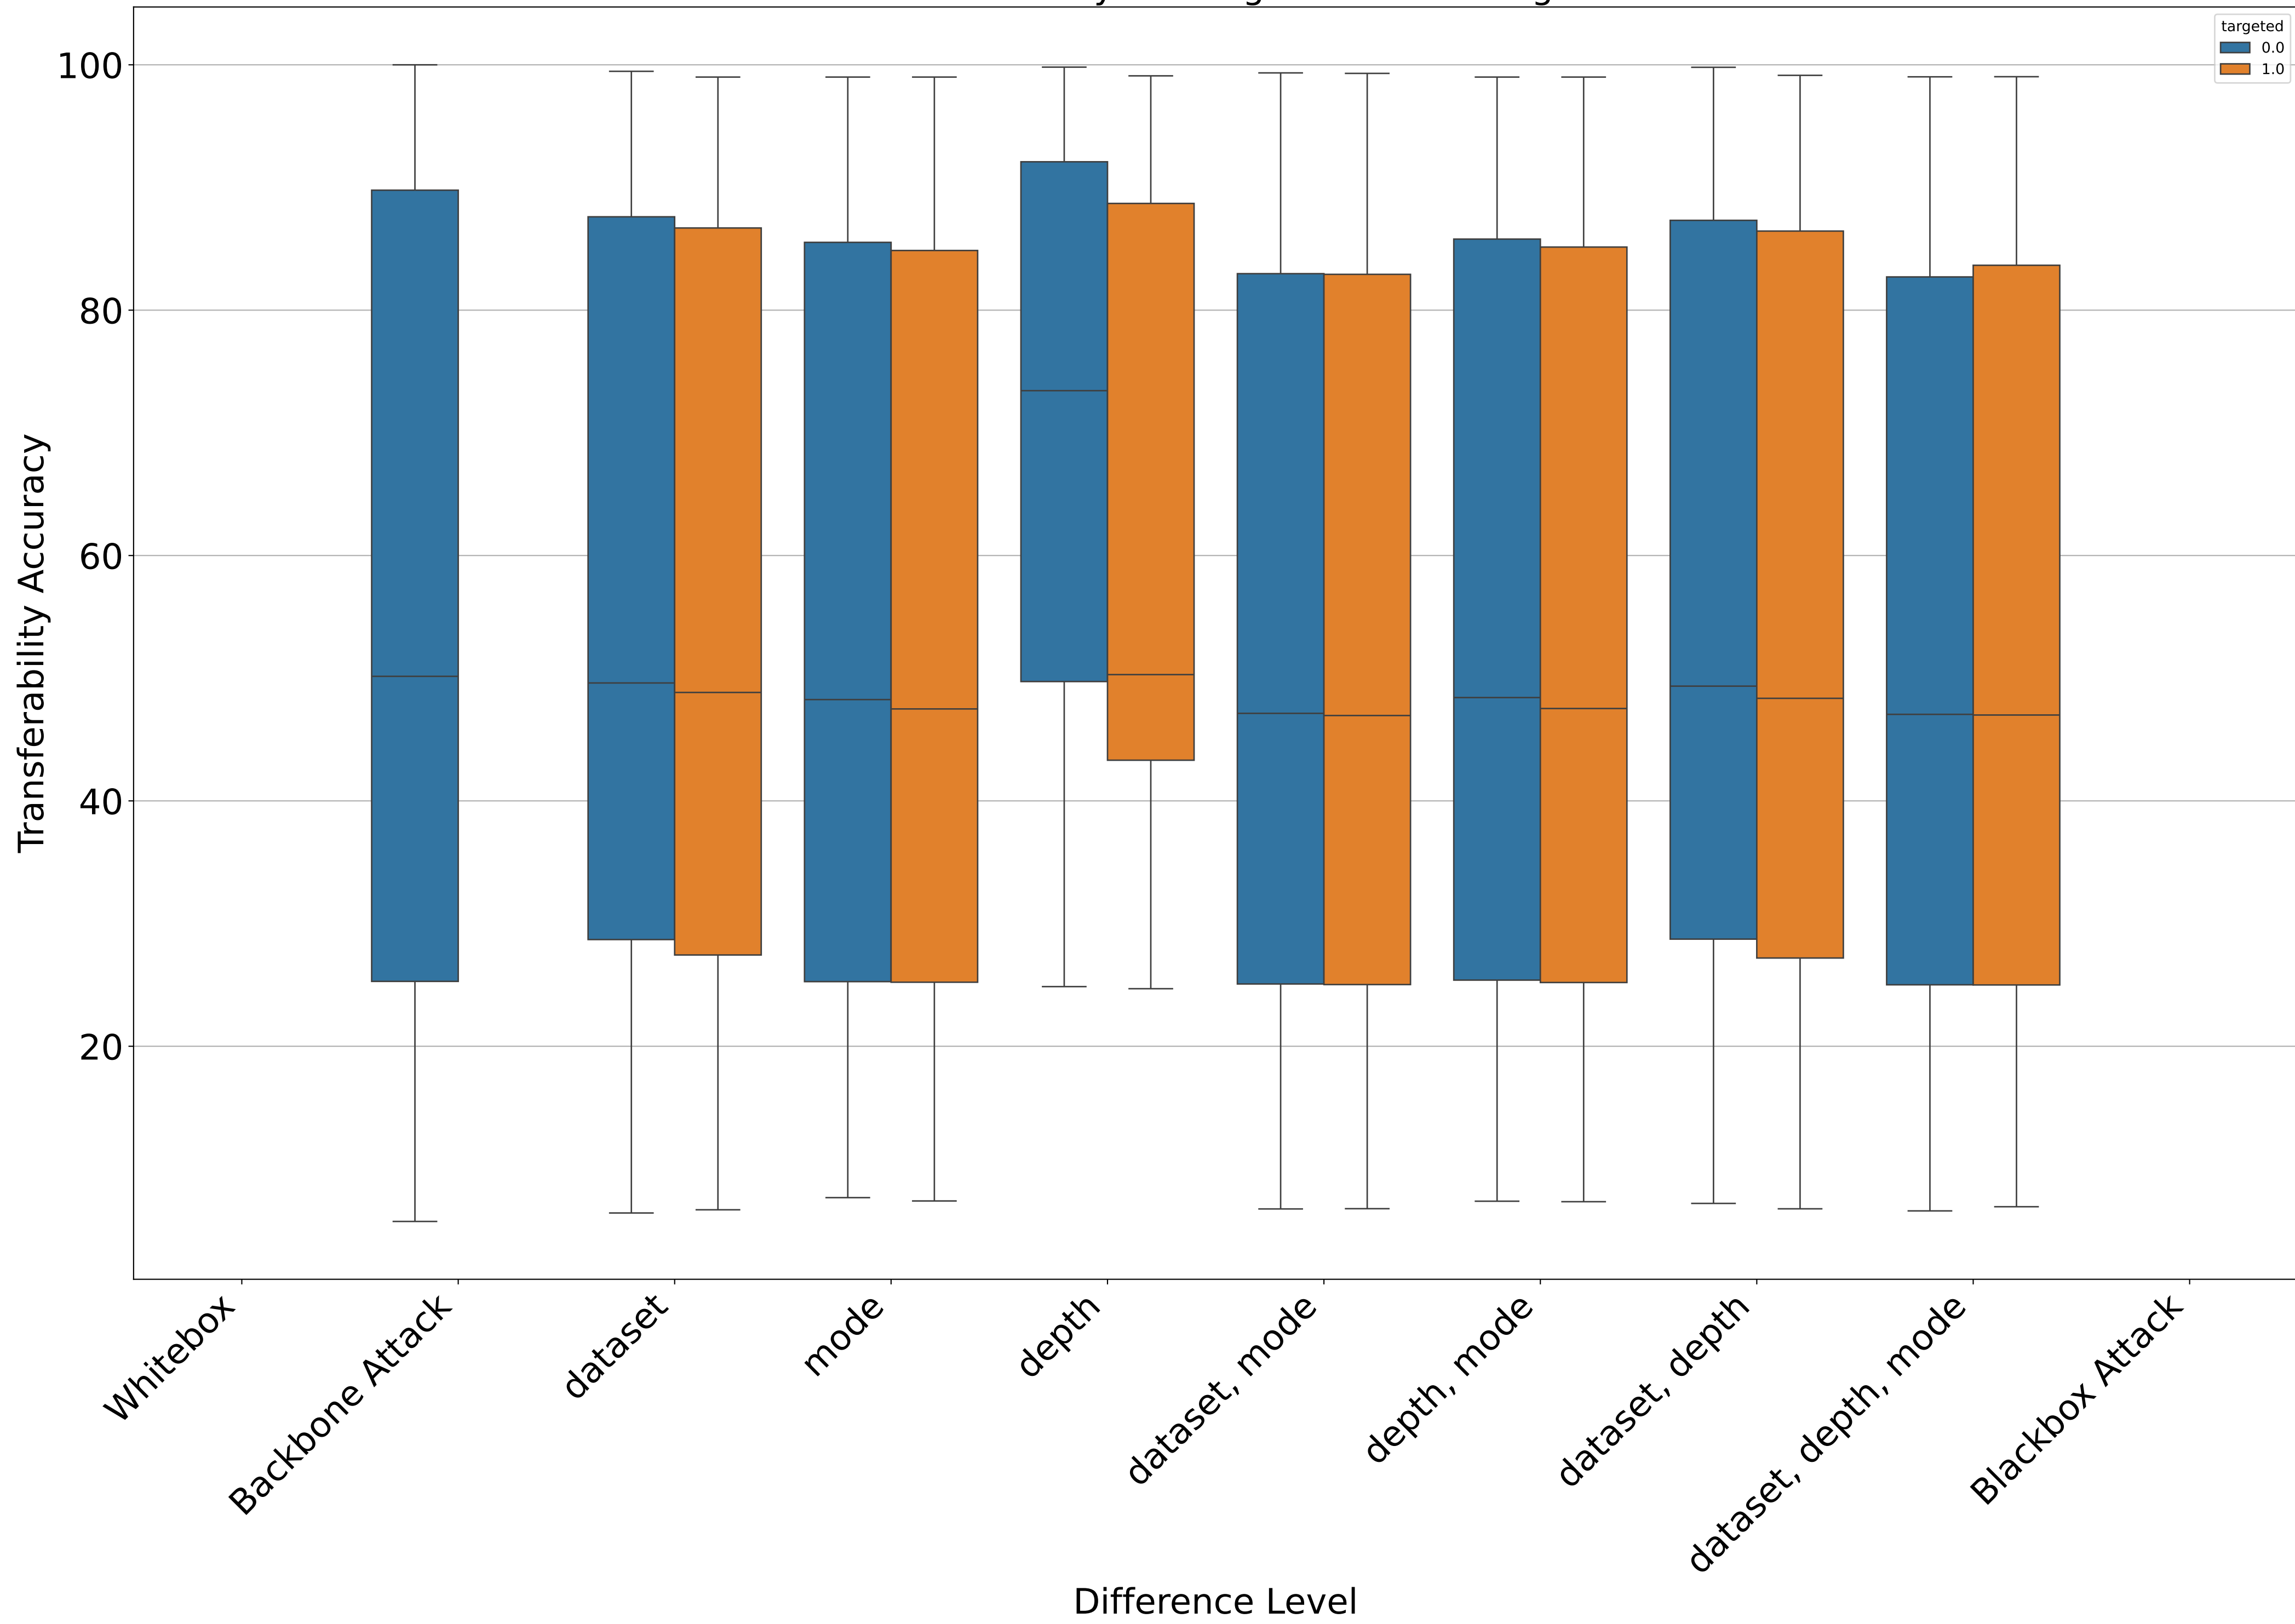

Supplement: supplementary_material [file transferability_targeted_untargeted_not_longerPGD.pdf › adversarial_for_icml/figures/transferability_targeted_untargeted_not_longerPGD.pdf]

Adversarial Transferability For Targeted vs non-Targeted Attacks

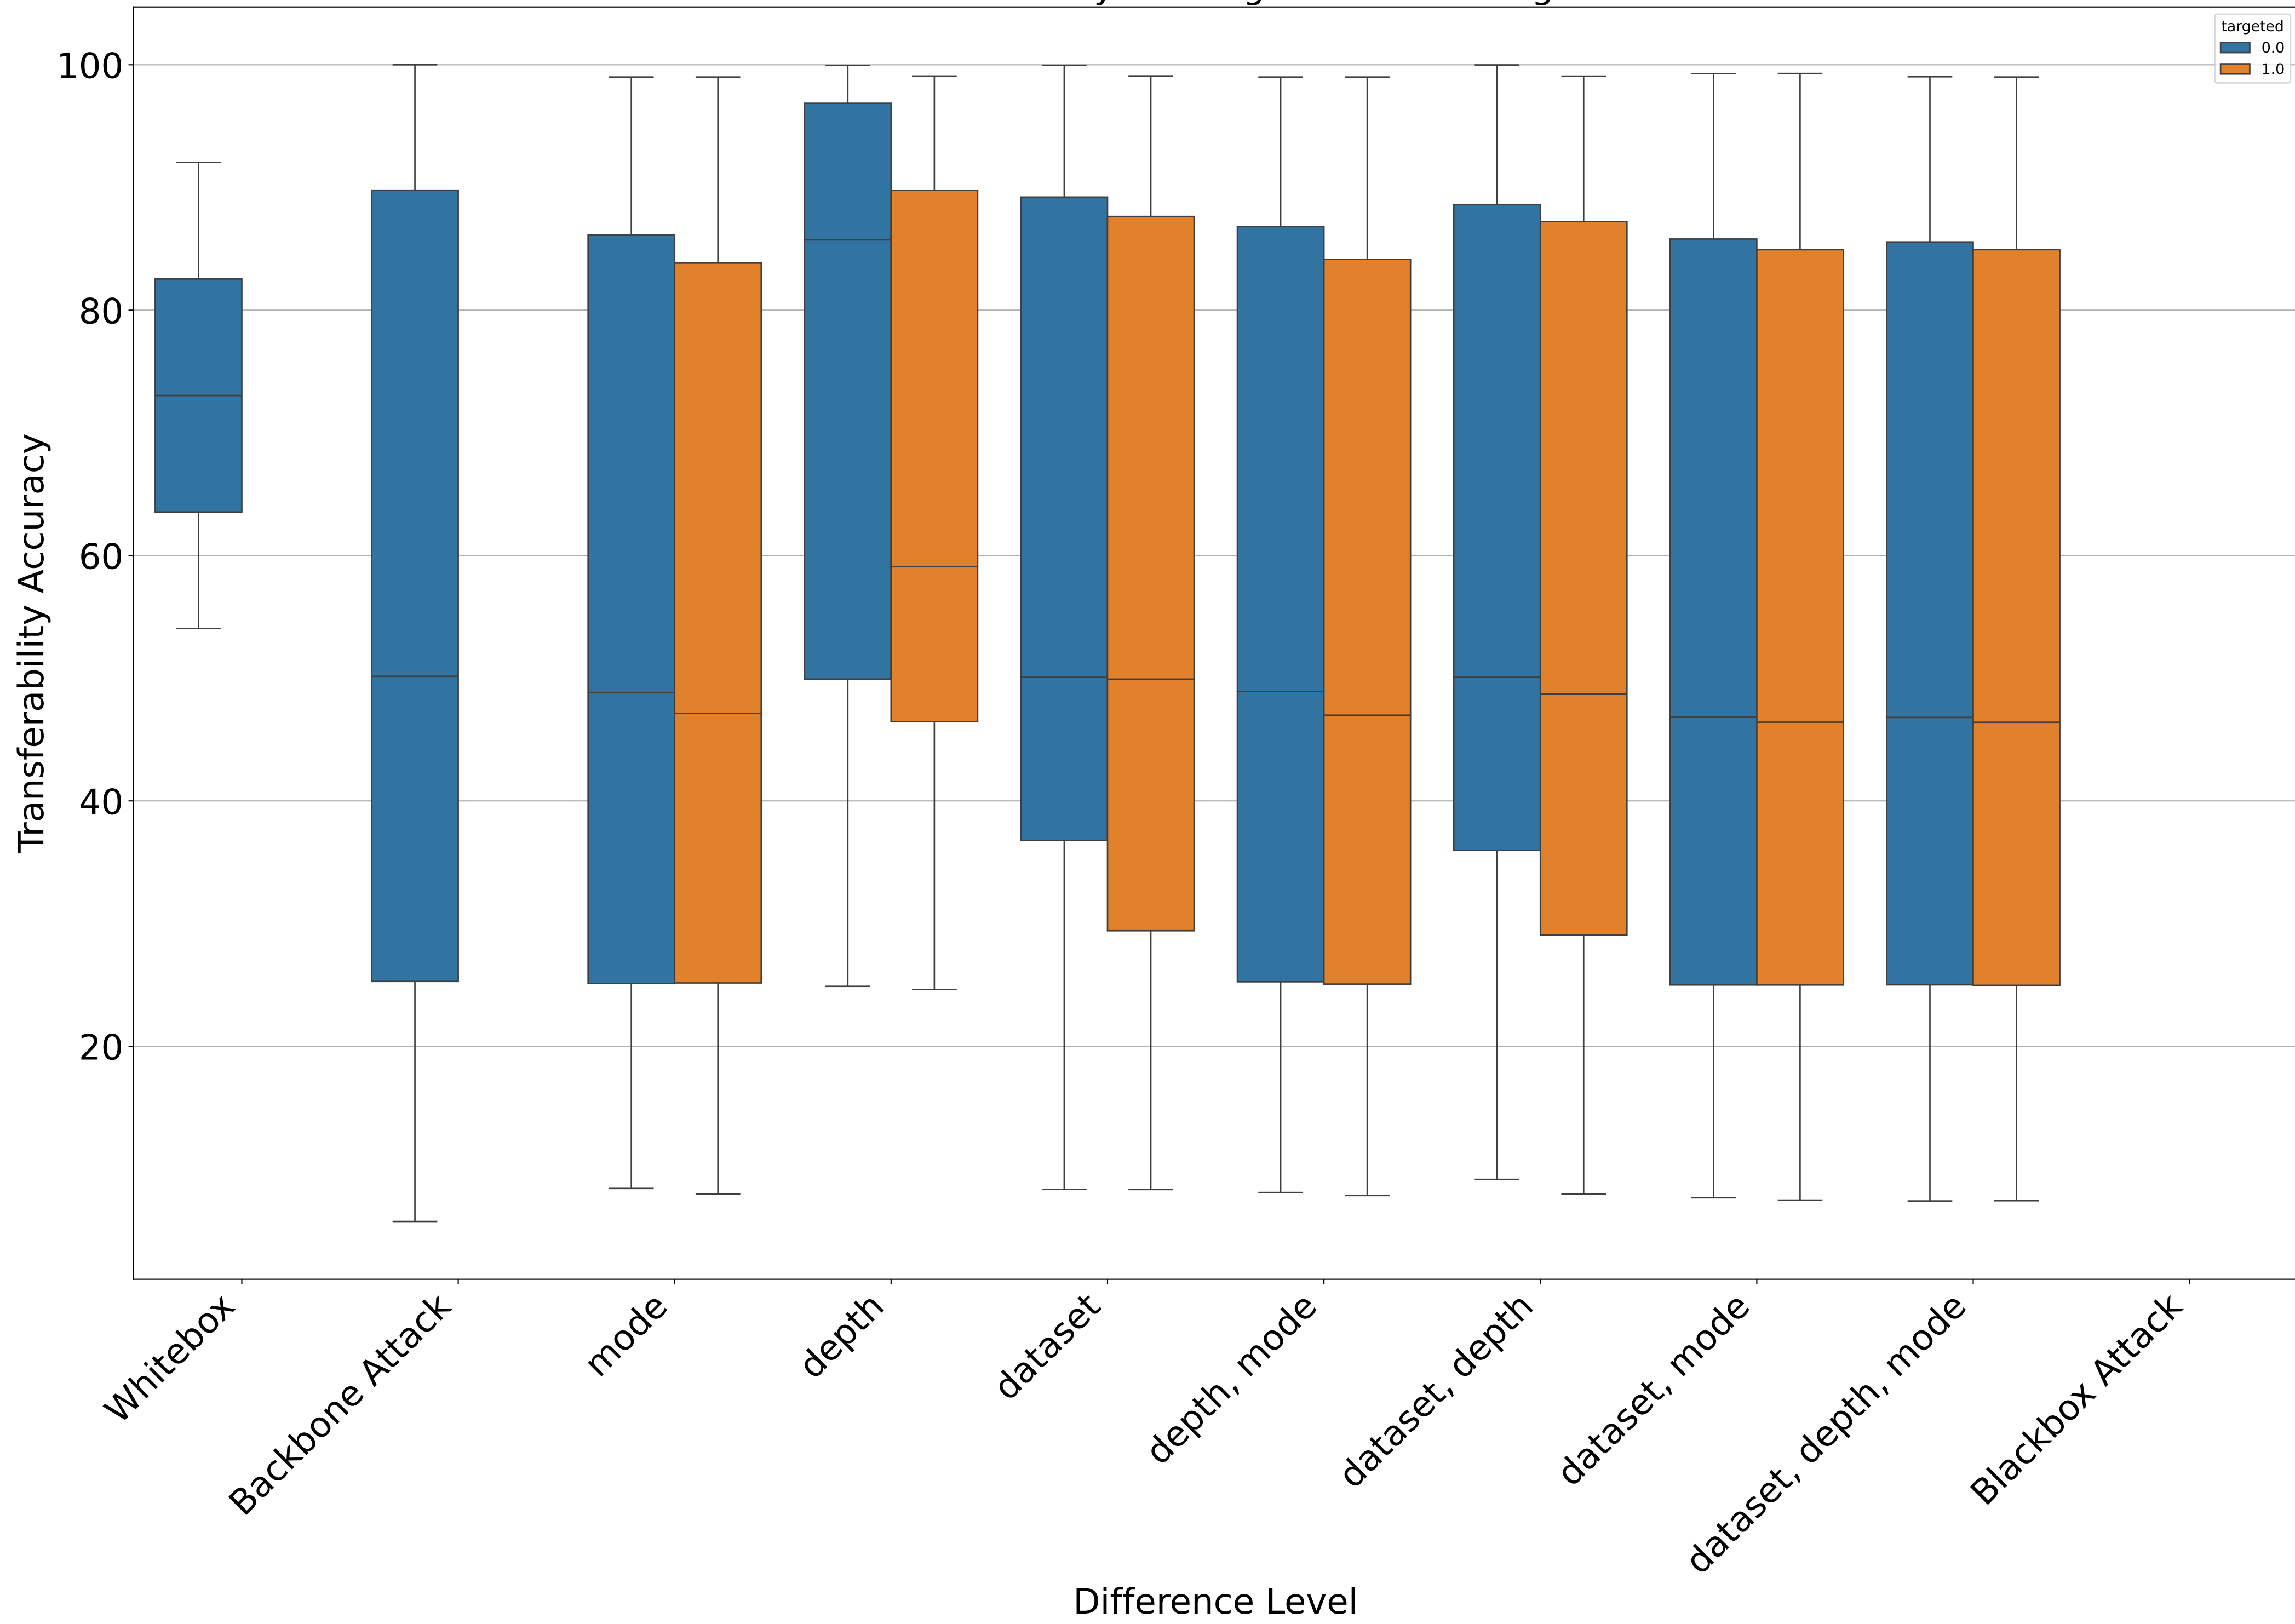

Supplement: supplementary_material [file transferability_targeted_untargeted_with_longerPGD.pdf › adversarial_for_icml/figures/transferability_targeted_untargeted_with_longerPGD.pdf]

# Adversarial Transferability For Different Attacks w.r.t. Target Tune Mode

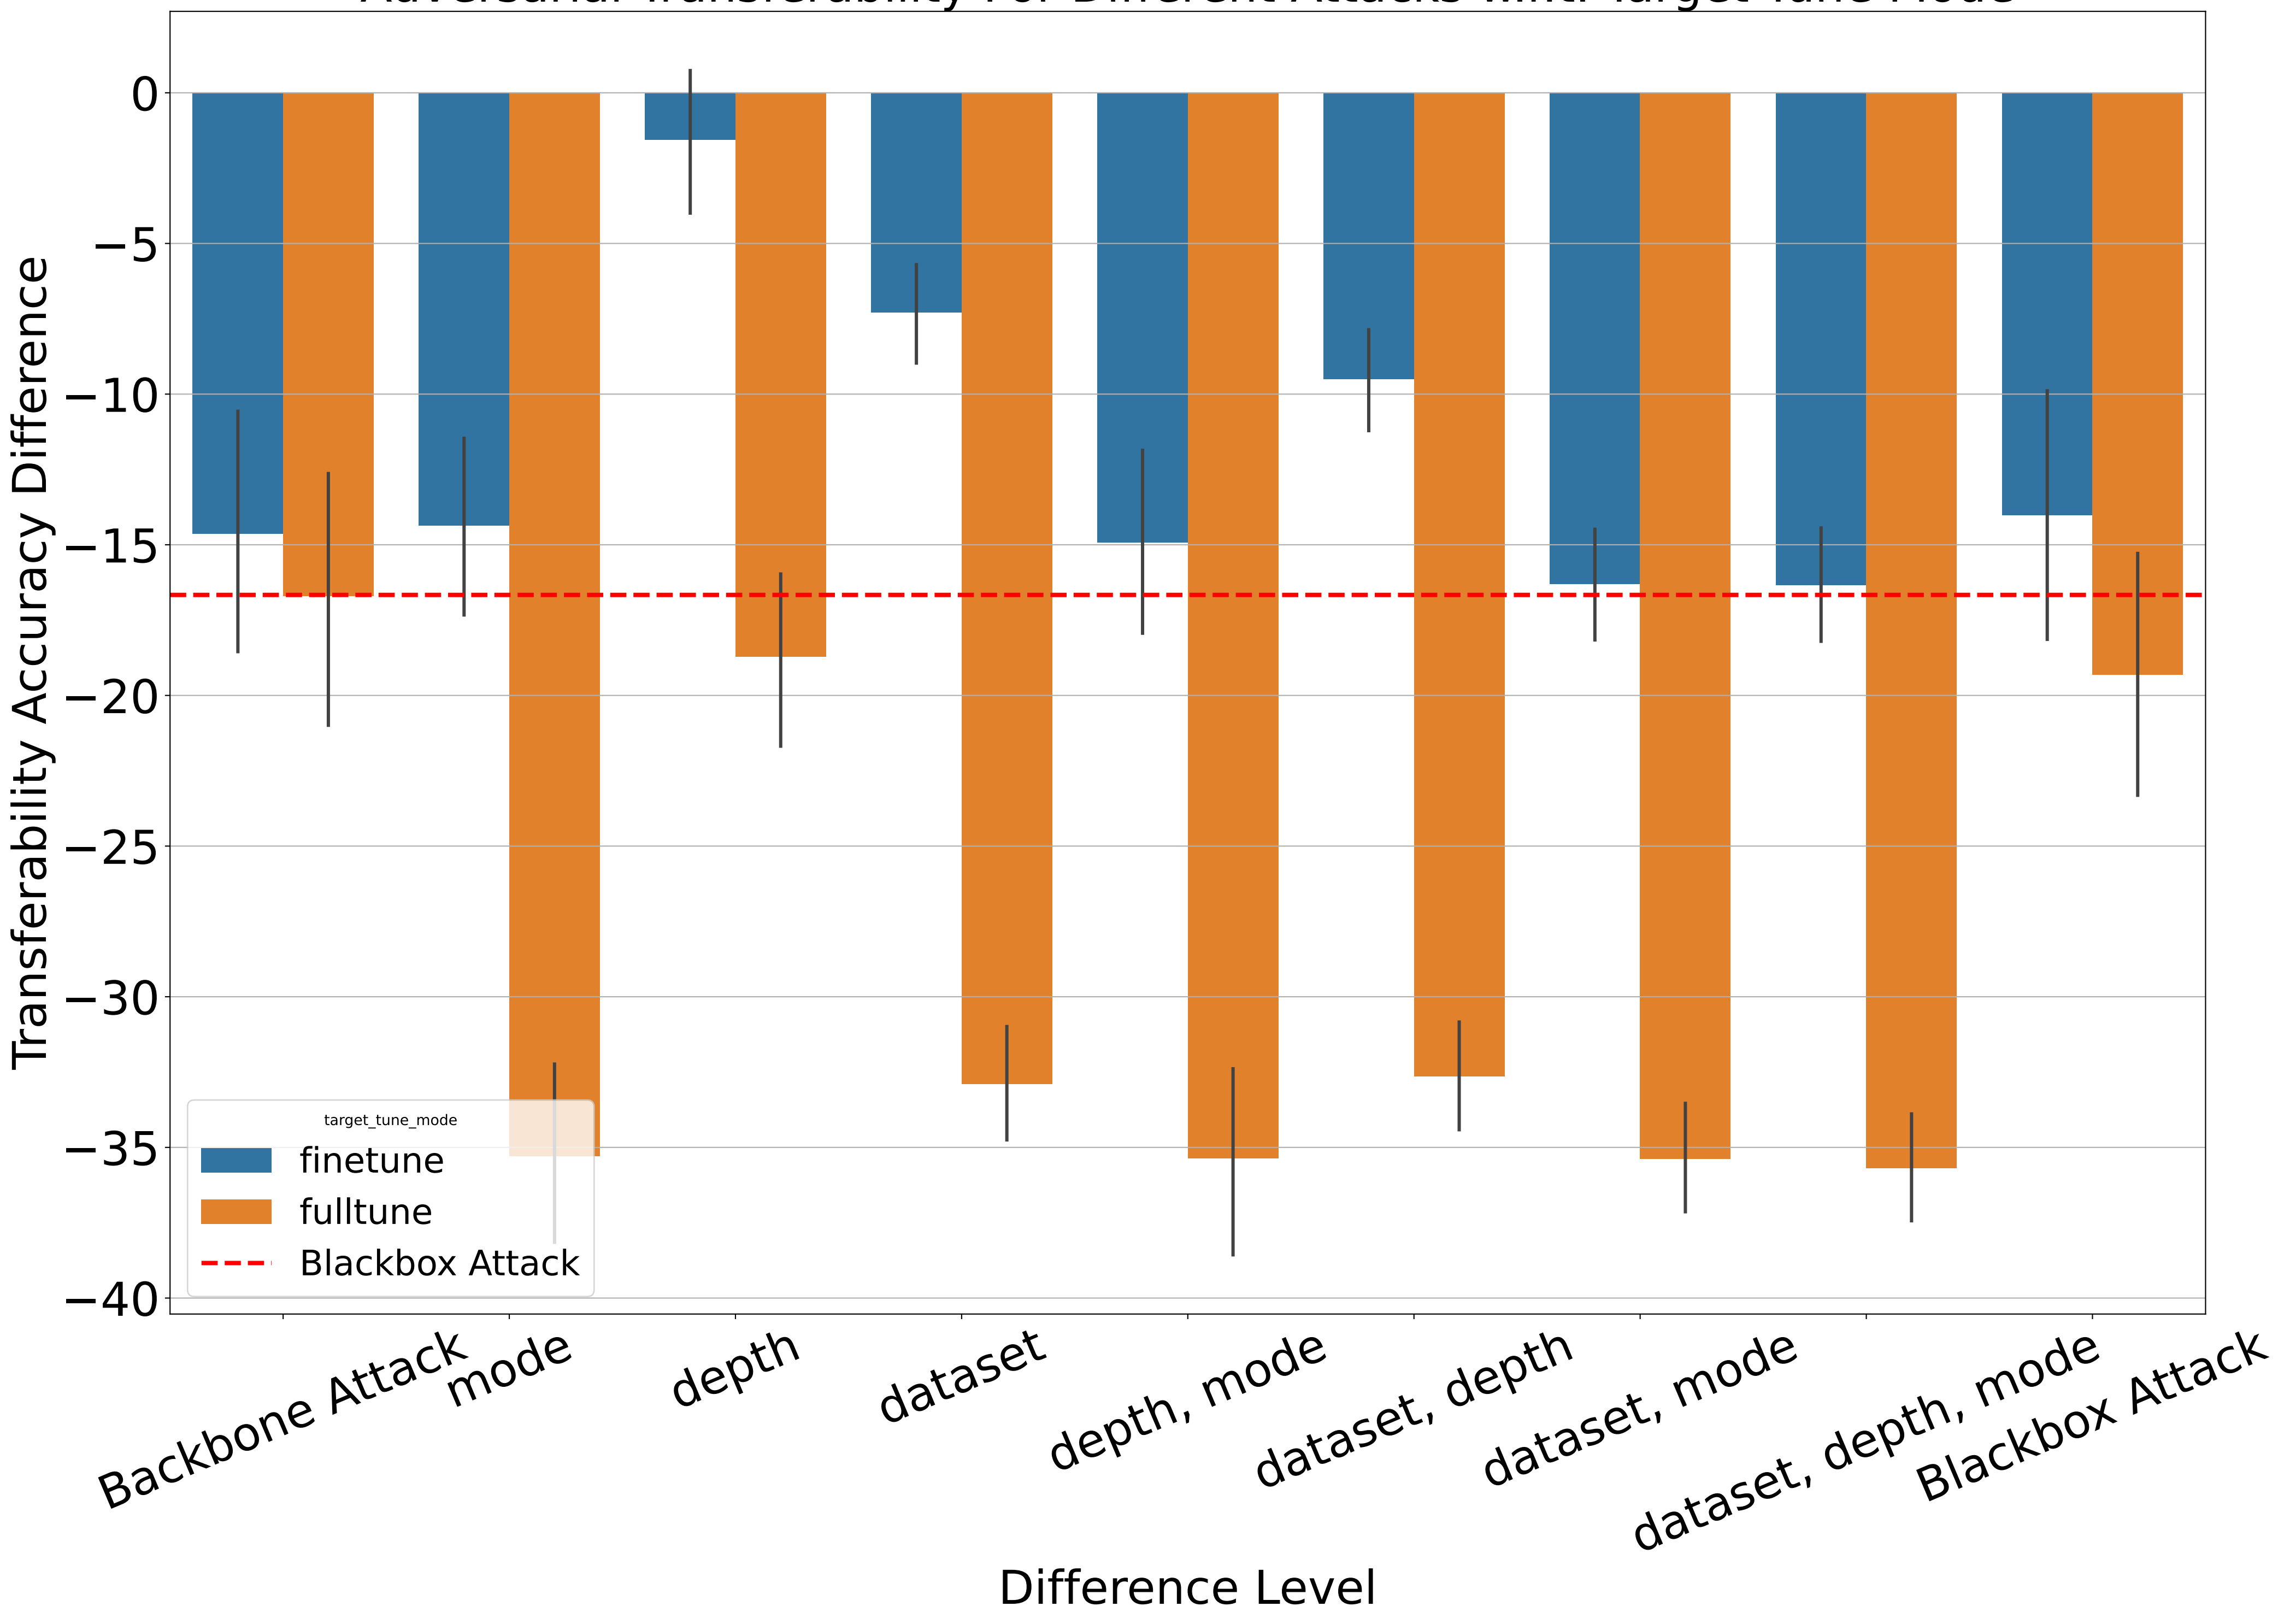

Supplement: supplementary_material [file transferability_tuning_techniques_whitebox_diff_with_longerPGD.pdf › adversarial_for_icml/figures/transferability_tuning_techniques_whitebox_diff_with_longerPGD.pdf]
